# Supplementary material
Source: Frontiers journal article supplement (https://www.frontiersin.org/articles/433407)
Supplement: Table_2.XLSX [file Table_2.XLSX]

## Sheet: Sheet1
Sample Name	Type	Microbial Species	Lifestyle
A.BG-1	sample	Armillaria luteobubalina	pathogen
A.BG-2	sample	Armillaria luteobubalina	pathogen
A.BG-3	sample	Armillaria luteobubalina	pathogen
A.BG-4	sample	Armillaria luteobubalina	pathogen
A.HWK2-1	sample	Armillaria luteobubalina	pathogen
A.HWK2-2	sample	Armillaria luteobubalina	pathogen
A.HWK2-3	sample	Armillaria luteobubalina	pathogen
A.HWK2-4	sample	Armillaria luteobubalina	pathogen
Ctrl-1	sample	Untreated_control	Untreated_control
Ctrl-2	sample	Untreated_control	Untreated_control
Ctrl-3	sample	Untreated_control	Untreated_control
Ctrl-4	sample	Untreated_control	Untreated_control
Phyt-1	sample	Phytophthora cinnamomi	pathogen
Phyt-2	sample	Phytophthora cinnamomi	pathogen
Phyt-3	sample	Phytophthora cinnamomi	pathogen
Phyt-4	sample	Phytophthora cinnamomi	pathogen
R10-1	sample	Pisolithus microcarpus	mutualist
R10-2	sample	Pisolithus microcarpus	mutualist
R10-3	sample	Pisolithus microcarpus	mutualist
R10-4	sample	Pisolithus microcarpus	mutualist
R4-1	sample	Pisolithus microcarpus	mutualist
R4-2	sample	Pisolithus microcarpus	mutualist
R4-3	sample	Pisolithus microcarpus	mutualist
R4-4	sample	Pisolithus microcarpus	mutualist
S.HWK6A-1	sample	Suillus granulatus	commensalist
S.HWK6A-2	sample	Suillus granulatus	commensalist
S.HWK6A-3	sample	Suillus granulatus	commensalist
S.HWK6A-4	sample	Suillus granulatus	commensalist
S.HWK6B-1	sample	Suillus granulatus	commensalist
S.HWK6B-2	sample	Suillus granulatus	commensalist
S.HWK6B-3	sample	Suillus granulatus	commensalist
S.HWK6B-4	sample	Suillus granulatus	commensalist
Sl14-1	sample	Pisolithus microcarpus	mutualist
Sl14-2	sample	Pisolithus microcarpus	mutualist
Sl14-3	sample	Pisolithus microcarpus	mutualist
Sl14-4	sample	Pisolithus microcarpus	mutualist
Sl9-1	sample	Pisolithus microcarpus	mutualist
Sl9-2	sample	Pisolithus microcarpus	mutualist
Sl9-3	sample	Pisolithus microcarpus	mutualist
Sl9-4	sample	Pisolithus microcarpus	mutualist
Wil3-1	sample	Pisolithus microcarpus	mutualist
Wil3-2	sample	Pisolithus microcarpus	mutualist
Wil3-3	sample	Pisolithus microcarpus	mutualist
Wil3-4	sample	Pisolithus microcarpus	mutualist
Wil4-1	sample	Pisolithus microcarpus	mutualist
Wil4-2	sample	Pisolithus microcarpus	mutualist
Wil4-3	sample	Pisolithus microcarpus	mutualist
Wil4-4	sample	Pisolithus microcarpus	mutualist
PBQC1	pooled_biological_quality_control	n.a.	n.a.
PBQC2	pooled_biological_quality_control	n.a.	n.a.
PBQC3	pooled_biological_quality_control	n.a.	n.a.
PBQC4	pooled_biological_quality_control	n.a.	n.a.
PBQC5	pooled_biological_quality_control	n.a.	n.a.
PBQC6	pooled_biological_quality_control	n.a.	n.a.
PBQC7	pooled_biological_quality_control	n.a.	n.a.
