# Supplementary material
Source: Frontiers journal article supplement (https://www.frontiersin.org/articles/433407)
Supplement: Table_3.XLSX [file Table_3.XLSX]

## Sheet: Specific Metabolites
Cp_#	ESI Mode	neutral_mass	retention_time(min)	armi_FC	armi_pval	piso_FC	piso_pval	suil_FC	suil_pval	phyt_FC	phyt_pval
Cp1	Positive	402.225	11.25	0.67255	0.3163	0.8807	0.56889	0.5627	0.16859	0.46954	0.10219
Cp10	Positive	222.056	8.643	0.42742	0.044794	0.60508	0.083314	0.49092	0.028875	0.92652	0.68116
Cp100	Positive	588.405	13.127	2.0301	0.51594	1.3569	0.50174	1.3325	0.97034	3.0117	0.2654
Cp1000	Positive	342.191	4.057	1.4285	0.15813	1.4254	0.0089526	1.0103	0.56709	1.3065	0.35427
Cp1001	Positive	504.345	12.832	1.8096	0.090296	1.0454	0.24223	0.87879	0.087649	1.7534	0.8652
Cp1002	Positive	687.507	10.821	2.7816	0.0004965	1.7008	0.32168	1.7715	0.047493	1.2973	0.22206
Cp1003	Positive	594.335	11.579	0.6939	0.069349	0.56031	0.0092316	0.80027	0.26504	0.78754	0.32599
Cp1004	Positive	419.179	4.10695	0.92087	0.67092	1.2096	0.6813	1.4151	0.67046	1.3094	0.89673
Cp1005	Positive	522.269	11.25	0.89224	0.82623	0.89206	0.65584	0.51933	0.12098	0.4669	0.10282
Cp1006	Positive	340.056	7.298	0.37238	0.094127	0.61422	0.21113	0.58639	0.34838	1.0749	0.90607
Cp1007	Positive	535.366	10.544	1.609	0.030756	1.8159	0.025912	1.5541	0.16467	1.6837	0.057906
Cp1008	Positive	336.139	4.402	2.102	0.12101	1.7895	0.25216	1.6322	0.28662	1.3166	0.40943
Cp1009	Positive	244.025	4.234	0.71425	0.13363	0.92689	0.49851	0.79959	0.23683	0.99466	0.9767
Cp101	Positive	438.303	10.658	2.2833	0.017836	2.1816	0.023213	1.8909	0.21923	1.59	0.18049
Cp1010	Positive	568.373	10.521	2.4896	0.07546	2.9162	0.0024413	2.2855	0.1041	2.1693	0.26244
Cp1011	Positive	522.319	10.908	1.4261	0.1015	1.1522	0.7427	1.0598	0.98067	0.65	0.26249
Cp1012	Positive	628.423	10.853	1.7938	0.17502	2.4143	0.23406	1.5092	0.93147	1.8158	0.4059
Cp1013	Positive	170.057	1.944	1.9764	0.010017	1.0949	0.70859	1.2072	0.50545	1.0847	0.82132
Cp1014	Positive	482.842	11.533	2.3834	0.024534	2.7565	0.0035594	2.6297	0.15867	2.5598	0.11925
Cp1015	Positive	526.868	10.988	2.0085	0.028345	2.3653	0.0044471	2.1022	0.082972	1.7831	0.071737
Cp1016	Positive	348.063	6.091	1.2038	0.45902	1.4578	0.058137	1.1247	0.85056	1.1421	0.47965
Cp1017	Positive	152.084	9.387	1.4679	0.0692	1.4364	0.12537	1.4529	0.073838	1.3742	0.35489
Cp1018	Positive	725.245	5.051	0.9647	0.61349	1.1739	0.64011	1.2416	0.81243	1.1428	0.63333
Cp1019	Positive	600.905	10.473	2.2891	0.0060379	2.8666	0.0038374	2.0739	0.14244	1.9681	0.048864
Cp102	Positive	320.147	5.729	1.7397	0.46665	1.7948	0.34471	1.5439	0.47295	0.8598	0.59004
Cp1020	Positive	158.085	2.814	0.75884	0.3121	0.8553	0.58332	0.83614	0.46898	0.52631	0.27874
Cp1021	Positive	513.278	6.092	1.2567	0.41112	1.8043	0.034591	1.176	0.67188	1.2198	0.48316
Cp1022	Positive	138.031	3.397	0.73646	0.32984	1.2109	0.49806	1.3347	0.64591	2.5831	0.20871
Cp1023	Positive	328.295	11.571	1.192	0.82564	1.3492	0.4969	0.8418	0.19303	0.40069	0.30327
Cp1024	Positive	441.201	2.313	4.0289	0.72897	4.2687	0.44134	7.7932	0.036931	5.038	0.17178
Cp1025	Positive	629.299	9.038	1.845	0.0023617	0.82946	0.42674	0.87757	0.67244	1.7092	0.11313
Cp1026	Positive	557.27	7.082	11.426	0.0063509	9.1218	0.00092425	5.2797	0.57096	7.2347	0.56385
Cp1027	Positive	72.0582	2.835	1.2287	0.41576	1.2223	0.46706	1.1567	0.51469	0.91259	0.98817
Cp1028	Positive	372.093	12.246	0.95061	0.77519	0.89275	0.59614	0.64965	0.27374	1.0012	0.9125
Cp1029	Positive	336.015	6.56	0.44743	0.64847	1.9436	0.00017663	0.88576	0.51749	1.7553	0.20826
Cp103	Positive	280.24	12.039	1.5855	0.35825	1.1324	0.84108	1.0625	0.78077	1.1334	0.82378
Cp1030	Positive	470.087	4.344	0.6583	0.1693	1.2268	0.66512	0.85044	0.5042	0.90778	0.41869
Cp1031	Positive	330.143	5.889	1.1652	0.59644	1.0582	0.79299	1.1335	0.92924	0.95409	0.80535
Cp1032	Positive	541.418	9.165	2.3731	0.011716	1.8973	0.8209	1.9565	0.87305	1.518	0.16181
Cp1033	Positive	159.979	5.905	0.42499	0.20104	1.1535	0.39427	1.0003	0.85905	1.1749	0.72852
Cp1034	Positive	356.041	8.626	0.34838	0.16899	0.62428	0.34631	0.45071	0.069376	1.0418	0.99753
Cp1035	Positive	479.342	10.462	0.26708	0.10488	0.80395	0.23555	0.70625	0.33882	1.6344	0.88631
Cp1036	Positive	300.034	7.713	0.67772	0.7882	0.72345	0.52413	0.56197	0.90443	1.5703	0.45884
Cp1037	Positive	504.856	11.175	1.6689	0.1085	2.2635	0.0076911	1.8754	0.10991	2.4434	0.079507
Cp1038	Positive	643.485	10.855	1.3975	0.46216	1.0324	0.96579	1.0222	0.79409	0.90934	0.85523
Cp1039	Positive	80.0629	9.51901	0.92005	0.80046	0.91206	0.65583	0.87274	0.49807	0.89655	0.61847
Cp104	Positive	521.347	10.145	3.7718	0.00097525	2.0789	0.030794	2.009	0.10761	5.437	0.0059296
Cp1040	Positive	237.979	5.727	0.58945	0.058467	0.77235	0.15233	0.71831	0.066053	0.87054	0.33623
Cp1041	Positive	316.06	4.82	2.4691	0.0013084	2.1903	0.0035406	2.5306	0.12413	2.8156	0.014077
Cp1042	Positive	294.096	3.638	1.7442	0.8439	1.0779	0.51755	1.0041	0.71284	0.88302	0.18658
Cp1043	Positive	475.27	9.235	7.5737	0.0058188	1.931	0.62086	2.0478	0.87294	5.3362	0.070599
Cp1044	Positive	302.171	10.783	1.2607	0.61923	1.4485	0.13308	1.0838	0.9882	1.0256	0.99649
Cp1045	Positive	441.256	6.946	1.1199	0.64936	2.6613	0.066601	1.4198	0.57633	2.2907	0.83865
Cp1046	Positive	325.024	7.066	2.3646	0.080223	2.7926	0.0032989	2.463	0.092785	1.8571	0.30329
Cp1047	Positive	546.324	5.278	0.84219	0.93625	0.85387	0.92785	0.74095	0.62342	0.81686	0.83047
Cp1048	Positive	353.024	8.637	0.38759	0.17606	0.53362	0.1685	0.44936	0.26423	0.76838	0.36388
Cp1049	Positive	136.051	4.526	1.6188	0.58139	1.106	0.57931	1.2452	0.49961	0.16366	0.17654
Cp105	Positive	455.237	6.421	1.387	0.37579	1.8083	0.2164	1.791	0.42706	1.5804	0.21289
Cp1050	Positive	722.461	10.035	4.3408	0.00018094	2.2231	0.005019	2.9657	0.030273	2.8576	0.071988
Cp1051	Positive	504.339	10.573	2.7278	0.79107	3.1139	0.78554	2.4972	0.82731	3.0823	0.22571
Cp1052	Positive	546.361	10.549	2.8049	0.59143	5.2389	1.16e-05	4.2404	0.014237	3.7942	0.093567
Cp1053	Positive	304.259	10.971	0.49523	0.006926	0.59842	0.32237	0.74631	0.15495	0.72725	0.14293
Cp1054	Positive	629.47	10.817	2.2474	0.020204	1.7954	0.20189	1.6839	0.3205	1.2042	0.43274
Cp1055	Positive	247.066	6.421	1.3711	0.92697	1.8554	0.67509	1.761	0.45982	1.7378	0.11386
Cp1056	Positive	122.036	5.973	1.0817	0.87471	1.0787	0.87311	0.99822	0.77219	0.96289	0.67514
Cp1057	Positive	457.805	10.658	2.4821	0.0063003	2.4139	0.010555	2.06	0.89566	1.7581	0.060101
Cp1058	Positive	484.352	12.848	0.56249	0.82259	0.5328	0.69714	0.87899	0.94236	0.4462	0.68687
Cp1059	Positive	416.788	10.686	2.237	0.019571	2.1171	0.036867	1.8649	0.2312	1.3882	0.34116
Cp106	Positive	460.313	10.629	2.498	0.0084085	2.4683	0.005579	2.1199	0.1067	1.8218	0.12383
Cp1060	Positive	284.124	4.858	0.68809	0.56332	1.6783	0.030296	0.90434	0.75094	3.8534	0.089811
Cp1061	Positive	414.204	9.59	0.92293	0.51788	0.97807	0.6586	0.9367	0.58293	1.1108	0.52836
Cp1062	Positive	690.196	8.279	0.67471	0.12367	0.87858	0.36871	1.1203	0.95754	1.3348	0.28128
Cp1063	Positive	438.357	12.149	1.1768	0.34526	0.93475	0.52213	0.90518	0.37521	1.1862	0.71297
Cp1064	Positive	242.043	3.559	0.9458	0.81577	1.1412	0.55831	0.82552	0.51611	0.79712	0.50676
Cp1065	Positive	316.154	8.71301	2.1407	0.084601	2.6051	0.067397	1.9744	0.27393	1.3085	0.25569
Cp1066	Positive	775.564	11.185	1.4115	0.67942	1.4688	0.065393	1.9272	0.50206	1.2882	0.55147
Cp1067	Positive	156.114	7.288	0.33419	0.019872	0.68205	0.36518	1.0859	0.6652	0.7154	0.48088
Cp1068	Positive	216.044	5.002	1.9751	0.48387	1.6576	0.46317	1.2665	0.77854	1.5591	0.32624
Cp1069	Positive	677.936	10.399	2.2675	0.083927	3.2262	0.0021521	2.1797	0.12115	1.8844	0.26846
Cp107	Positive	963.901	6.087	1.4999	0.36579	3.2161	0.043978	1.4578	0.68744	1.1862	0.41935
Cp1070	Positive	410.218	5.737	0.75729	0.7642	1.0577	0.75867	0.66292	0.87865	1.1208	0.4399
Cp1071	Positive	415.22	4.499	1.6238	0.22478	1.35	0.11421	1.1082	0.95737	1.2006	0.74683
Cp1072	Positive	419.178	3.831	2.7918	0.42403	8.425	0.19691	3.5701	0.41959	7.2072	0.16352
Cp1073	Positive	531.285	9.426	0.84446	0.38052	0.94936	0.70201	1.0034	0.86256	0.91371	0.68585
Cp1074	Positive	306.168	6.656	1.0125	0.8529	1.5019	0.35543	1.7498	0.52786	1.5585	0.20274
Cp1075	Positive	926.7	10.523	1.5061	0.18859	1.1132	0.81019	1.0197	0.82339	1.1054	0.57716
Cp1076	Positive	216.026	11.25	0.66442	0.41841	0.88994	0.6412	0.55914	0.37634	0.40435	0.26625
Cp1077	Positive	538.316	10.235	1.7608	0.019552	0.96328	0.44897	0.76723	0.31783	1.0585	0.9217
Cp1078	Positive	263.057	7.08	1.3065	0.054982	0.6597	0.65593	0.90315	0.82206	0.00057419	0.1345
Cp1079	Positive	240.199	6.37	1.0286	0.30497	0.30548	0.67612	0.19509	0.40128	0.12178	0.1648
Cp108	Positive	554.31	9.428	0.85692	0.30908	0.91527	0.41016	0.91682	0.5493	0.94282	0.73931
Cp1080	Positive	606.908	10.873	4.8928	0.0076297	7.2266	3.61e-06	4.6383	0.30169	6.2816	0.056115
Cp1081	Positive	481.216	6.633	1.3501	0.52992	1.3551	0.29033	0.92523	0.23091	0.57494	0.15684
Cp1082	Positive	590.384	10.494	2.1545	0.004933	2.5262	0.0058327	1.8363	0.85212	1.9151	0.069691
Cp1083	Positive	646.299	9.038	1.6793	0.0083882	0.82688	0.60609	0.94191	0.96124	1.654	0.10985
Cp1084	Positive	212.068	11.249	0.63208	0.26062	0.84147	0.58946	0.54723	0.36913	0.44564	0.093431
Cp1085	Positive	410.303	11.451	1.5399	0.11002	1.5434	0.038781	1.1028	0.72645	1.0779	0.93967
Cp1086	Positive	490.84	10.603	2.3475	0.015577	2.398	0.009577	2.0611	0.1489	1.8001	0.1094
Cp1087	Positive	298.054	8.45801	0.26422	0.058074	0.5039	0.093609	0.52618	0.101	0.7107	0.31756
Cp1088	Positive	600.932	13.177	1.396	0.93557	3.1205	0.11996	1.5618	0.82888	1.5109	0.53733
Cp1089	Positive	295.155	4.407	0.70742	0.23579	1.1779	0.42751	1.1391	0.95894	0.95318	0.74901
Cp109	Positive	704.47	10.898	0.93857	0.62817	1.0547	0.88756	0.91698	0.55185	1.1106	0.67061
Cp1090	Positive	495.333	9.92499	1.6861	0.31498	1.1191	0.3673	1.0164	0.47188	1.2946	0.56017
Cp1091	Positive	122.037	4.657	0.81823	0.42676	1.0155	0.99312	0.89882	0.57669	1.0609	0.97752
Cp1092	Positive	513.278	7.224	0.59027	0.19605	1.9188	0.46729	1.5915	0.28108	1.6567	0.96566
Cp1093	Positive	541.188	4.904	0.89588	0.48817	1.0785	0.9949	0.95997	0.52774	1.2021	0.5653
Cp1094	Positive	408.293	11.467	1.7838	0.38401	1.5892	0.93252	1.4176	0.71679	1.4508	0.4006
Cp1095	Positive	388.257	11.345	1.2505	0.32043	1.1296	0.89862	1.0952	0.88666	1.2025	0.48005
Cp1096	Positive	394.216	10.862	1.6077	0.069768	1.3868	0.13305	1.6433	0.10612	1.1777	0.64182
Cp1097	Positive	512.855	10.576	2.4012	0.0061797	2.5376	0.0081939	2.0865	0.10332	1.8838	0.079939
Cp1098	Positive	454.145	3.578	0.67368	0.28941	1.1522	0.14335	0.88325	0.82153	0.8039	0.7068
Cp1099	Positive	630.41	10.473	2.0261	0.018238	2.4297	0.0048312	1.8748	0.16185	1.8231	0.11317
Cp11	Positive	477.285	9.711	1.3961	0.50924	1.3445	0.78014	1.238	0.74681	2.0819	0.52581
Cp110	Positive	309.303	13.062	0.76781	0.3815	0.88336	0.44573	0.54008	0.10424	0.95574	0.71501
Cp1100	Positive	599.462	10.881	1.6103	0.038423	1.2919	0.89253	1.393	0.82333	1.0526	0.70166
Cp1101	Positive	272.188	7.84	0.16314	0.044778	0.572	0.31968	0.52474	0.090346	0.61263	0.22938
Cp1102	Positive	334.036	9.063	0.50726	0.15487	0.77523	0.27888	0.73395	0.30929	0.91842	0.47624
Cp1103	Positive	588.422	12.532	0.67108	0.31781	0.79871	0.20573	0.35268	0.048604	0.28085	0.12032
Cp1104	Positive	312.16	9.323	0.3059	0.097139	0.458	0.22846	0.32885	0.16632	0.50963	0.11752
Cp1105	Positive	482.842	11.203	2.2973	0.012279	2.429	0.0053082	2.5519	0.08788	2.9378	0.021098
Cp1106	Positive	405.271	10.767	1.0115	0.86873	1.2144	0.69799	0.87842	0.52513	0.74321	0.18511
Cp1107	Positive	318.278	10.983	0.55886	0.0052492	0.5718	0.081533	0.65063	0.15439	0.75928	0.30532
Cp1108	Positive	494.343	11.189	1.7134	0.43929	2.3907	0.78912	2.3569	0.96846	2.2497	0.089635
Cp1109	Positive	464.189	5.94	1.4606	0.55601	1.9123	0.11382	1.6375	0.87108	1.0537	0.99936
Cp111	Positive	267.256	11.543	0.60624	0.31578	0.70463	0.2972	0.44234	0.11217	0.56337	0.35652
Cp1110	Positive	338.97	5.123	0.96018	0.56633	1.0766	0.7736	0.99257	0.99691	1.4766	0.60054
Cp1111	Positive	290.12	11.363	0.33542	0.15464	0.497	0.21231	0.31319	0.17067	0.73078	0.51098
Cp1112	Positive	353.275	9.917	0.25363	0.57904	0.79821	0.90497	0.21785	0.57137	0.3481	0.93015
Cp1113	Positive	647.257	5.249	1635.1	1.8642e-09	7238.1	0.0010009	1307.7	0.0010621	902.36	0.027737
Cp1114	Positive	494.182	6.091	1.5841	0.11249	2.1934	0.0028809	1.6354	0.82749	1.3851	0.30629
Cp1115	Positive	326.119	9.382	1.243	0.12417	1.3082	0.065301	1.2988	0.1229	1.2282	0.43159
Cp1116	Positive	819.588	10.729	3.8183	0.0017346	3.6521	0.015464	3.326	0.012018	2.7345	0.0089305
Cp1117	Positive	559.872	11.11	1.6707	0.08188	2.218	0.0089514	1.9456	0.17599	1.8415	0.098565
Cp1118	Positive	579.252	6.136	1.8087	0.23319	1.7526	0.29401	1.3666	0.55229	0.98518	0.50627
Cp1119	Positive	338.016	6.094	1.0336	0.77708	1.4436	0.024245	1.0583	0.94449	1.1481	0.53404
Cp112	Positive	279.254	11.454	0.5927	0.26319	0.70205	0.42612	0.54771	0.16806	0.63087	0.42501
Cp1120	Positive	321.989	2.167	1.8165	0.13155	3.2775	0.0013649	2.9738	0.082713	3.1819	0.21132
Cp1121	Positive	552.181	6.976	1.3048	0.98104	1.1808	0.58367	0.54187	0.1676	0.23879	0.028459
Cp1122	Positive	424.103	10.225	0.51043	0.076563	0.68989	0.14843	0.4858	0.046544	1.137	0.92265
Cp1123	Positive	273.122	3.35	0.6305	0.69954	1.5125	0.057197	1.172	0.50714	1.4917	0.26471
Cp1124	Positive	452.806	11.395	2.4268	0.0048127	2.3797	0.00043757	2.1479	0.10016	2.6596	0.042861
Cp1125	Positive	926.698	10.448	3.2578	0.00079125	1.0568	0.49362	1.1419	0.69131	1.8106	0.17842
Cp1126	Positive	152.083	10.966	6.0664	0.012382	5.2921	0.04927	3.3333	0.38242	0.48153	0.55936
Cp1127	Positive	324.142	3.683	2.476	0.40054	5.1468	0.089164	5.8386	0.37695	9.6754	0.20755
Cp1128	Positive	322.142	8.27	0.66138	0.33075	0.2516	0.64112	0.16852	0.58885	0.06089	0.32949
Cp1129	Positive	746.531	13.126	1.8102	0.11961	0.96083	0.65685	1.27	0.6436	2.0081	0.90135
Cp113	Positive	171.125	5.01	3.1924	0.012218	2.6635	0.88345	1.5991	0.41903	0.99558	0.48128
Cp1130	Positive	470.338	10.038	3.6121	0.00039667	1.7048	0.11708	2.3045	0.085384	2.3857	0.21942
Cp1131	Positive	178.057	3.974	0.83467	0.24726	0.83009	0.38158	0.76873	0.43473	0.89584	0.40942
Cp1132	Positive	297.038	6.037	1.6837	0.61989	1.7653	0.89434	0.8624	0.32448	1.056	0.99028
Cp1133	Positive	216.17	9.672	0.18288	0.0279	0.3378	0.077711	0.38745	0.18073	0.59771	0.04374
Cp1134	Positive	785.485	12.229	2.0408	0.25822	2.0981	0.59587	2.7942	0.3998	3.3238	0.4569
Cp1135	Positive	581.393	13.226	2.7619	0.57091	5.65	0.0015923	3.1685	0.56223	3.5748	0.085818
Cp1136	Positive	622.917	10.446	2.1355	0.0074785	2.8147	0.0031735	1.9457	0.094754	1.8711	0.065801
Cp1137	Positive	246.109	6.987	1.0368	0.82928	1.1258	0.71387	0.73266	0.36443	0.55524	0.31567
Cp1138	Positive	509.17	4.987	0.94894	0.68885	0.97027	0.73805	1.0993	0.95192	0.92557	0.66701
Cp1139	Positive	134.022	9.063	0.61763	0.053351	0.80667	0.53974	0.77618	0.43665	0.9824	0.88287
Cp114	Positive	618.392	11.047	3.5411	0.00022398	1.9909	0.0051936	1.9143	0.088167	1.4956	0.30249
Cp1140	Positive	182.095	11.079	0.51209	0.22407	1.0264	0.91505	1.7038	0.040116	1.0599	0.92699
Cp1141	Positive	378.153	5.396	1.769	0.38844	1.355	0.59479	1.2459	0.85122	0.75226	0.40454
Cp1142	Positive	584.895	11.05	2.7612	0.00034411	3.9977	9.3e-05	2.9508	0.010119	3.722	0.0068506
Cp1143	Positive	472.256	9.426	2.0709	0.38415	1.7226	0.40184	2.1784	0.38575	2.3685	0.47614
Cp1144	Positive	416.207	10.087	1.2557	0.50644	1.3869	0.75959	1.1265	0.52291	0.43129	0.14698
Cp1145	Positive	634.41	10.446	2.1494	0.0024257	2.7201	0.0032014	1.9963	0.11317	1.8633	0.042087
Cp1146	Positive	386.195	4.327	1.8248	0.014927	1.6322	0.13056	1.6274	0.17508	2.0707	0.12548
Cp1147	Positive	247.069	3.964	0.76112	0.32817	1.3734	0.21865	1.3232	0.55182	0.98884	0.67754
Cp1148	Positive	436.335	11.042	1.7536	0.32844	1.7431	0.11867	1.6047	0.7148	0.9761	0.56144
Cp1149	Positive	396.034	3.574	0.76296	0.32365	1.2561	0.1874	0.91728	0.64574	0.80755	0.48083
Cp115	Positive	206.151	6.397	4.1497	0.0018758	3.0732	0.023887	2.4873	0.17253	2.768	0.34319
Cp1150	Positive	556.907	13.273	18.456	0.50585	1562.9	0.40974	12.656	0.50585	n.d.	n.d.
Cp1151	Positive	176.047	9.053	0.6345	0.096821	0.79904	0.23048	0.84306	0.4532	0.69073	0.1485
Cp1152	Positive	157.146	3.496	0.64763	0.045654	0.96726	0.58817	0.97405	0.65023	0.92746	0.47065
Cp1153	Positive	399.126	10.359	1.1564	0.7146	1.2646	0.29177	1.1726	0.86529	1.2725	0.038658
Cp1154	Positive	368.096	9.022	0.71194	0.15714	0.84171	0.29514	0.75127	0.21166	1.169	0.73155
Cp1155	Positive	356.206	5.229	0.86475	0.42232	0.97113	0.83993	0.98996	0.6536	0.78842	0.56875
Cp1156	Positive	524.346	10.574	2.3177	0.0064006	2.4567	0.0079422	1.8911	0.58662	1.9514	0.080693
Cp1157	Positive	476.153	3.625	0.66217	0.069501	1.0519	0.71064	1.1722	0.86528	1.0411	0.62471
Cp1158	Positive	315.231	3.145	1.0939	0.9255	1.2707	0.60812	1.1007	0.9078	1.2778	0.23543
Cp1159	Positive	487.354	11.397	1.1796	0.54764	1.5603	0.076785	1.3468	0.95929	1.5097	0.32205
Cp116	Positive	248.062	3.962	0.82387	0.55212	1.4929	0.16221	1.5971	0.38314	1.1658	0.96688
Cp1160	Positive	553.177	5.106	1.424	0.17724	2.0927	0.0039163	1.8279	0.1308	1.9188	0.29281
Cp1161	Positive	581.886	11.078	1.9128	0.0012454	2.9427	0.0041962	2.6129	0.010569	2.0835	0.024398
Cp1162	Positive	560.222	8.144	1.3702	0.59973	2.8445	0.079238	2.2925	0.13818	0.82351	0.96218
Cp1163	Positive	395.979	5.993	0.63475	0.057655	0.73327	0.25789	0.8932	0.64612	0.88937	0.71607
Cp1164	Positive	440.262	10.043	1.2	0.59696	1.6248	0.68254	1.2679	0.77876	1.4188	0.17146
Cp1165	Positive	258.148	9.651	1.2764	0.9996	1.6432	0.67158	1.3623	0.74527	0.5219	0.82095
Cp1166	Positive	454.342	11.049	2.3241	0.0024305	1.3203	0.38816	1.2104	0.54339	0.86032	0.74644
Cp1167	Positive	438.349	12.515	1.5095	0.92655	0.89685	0.39603	1.4656	0.67745	1.4391	0.21891
Cp1168	Positive	441.202	2.957	11.046	0.060672	8.5922	0.1841	10.252	0.23173	5.1121	0.38031
Cp1169	Positive	183.162	4.561	0.6827	0.037224	0.93087	0.47704	0.89858	0.45375	1.0306	0.79045
Cp117	Positive	372.142	3.651	3.8753	0.00033327	2.9734	0.0062062	3.1985	0.0084441	2.7724	0.057516
Cp1170	Positive	558.327	9.826	1.1169	0.57907	1.6514	0.38276	0.8081	0.40966	0.5308	0.033561
Cp1171	Positive	310.199	9.697	0.39077	0.18496	0.67934	0.4164	0.72719	0.21603	0.99172	0.86962
Cp1172	Positive	375.307	9.645	1.787	0.52263	1.7286	0.81652	0.90097	0.46772	2.8123	0.29198
Cp1173	Positive	520.829	10.448	1.9331	0.006536	0.95079	0.98383	0.88254	0.80679	1.4692	0.37784
Cp1174	Positive	333.3	12.473	0.47957	0.28662	0.72521	0.36505	0.35624	0.092572	0.33644	0.22847
Cp1175	Positive	496.843	11.332	2.244	0.034531	3.6916	0.0047203	3.4836	0.025513	5.0484	0.010537
Cp1176	Positive	426.026	4.657	0.82986	0.37291	1.0131	0.94985	1.0535	0.57993	1.0776	0.86183
Cp1177	Positive	326.18	10.446	1.544	8.0562e-05	1.0683	0.88742	1.0783	0.79731	1.1291	0.60671
Cp1178	Positive	376.211	9.256	0.92482	0.71627	0.94345	0.67642	0.89682	0.77472	0.68113	0.36417
Cp1179	Positive	270.071	6.086	1.4775	0.2354	2.4631	0.024811	1.521	0.44349	1.7722	0.14827
Cp118	Positive	462.181	11.643	1974.4	0.042519	n.d.	n.d.	n.d.	n.d.	n.d.	n.d.
Cp1180	Positive	314.063	5.11	1.3649	0.66087	1.5861	0.66877	1.5928	0.47645	4.25	0.14659
Cp1181	Positive	208.109	7.598	0.75521	0.19076	0.95442	0.67434	0.9843	0.7556	0.83693	0.36133
Cp1182	Positive	396.211	12.649	0.68535	0.28949	1.0178	0.9909	0.92752	0.5818	1.4732	0.097774
Cp1183	Positive	557.392	11.423	0.93696	0.70755	1.1182	0.87921	1.1594	0.50505	1.3398	0.21518
Cp1184	Positive	487.349	12.201	0.68631	0.16844	0.81142	0.41284	0.42852	0.089257	0.62426	0.30766
Cp1185	Positive	566.173	2.794	1.7709	0.79286	1.3921	0.85634	1.9075	0.77661	1.0029	0.40738
Cp1186	Positive	148.054	1.547	0.7532	0.65928	0.97018	0.87204	0.43947	0.56196	0.49479	0.50325
Cp1187	Positive	198.029	3.937	1.2758	0.16708	2.0757	0.00026598	1.7323	0.080001	1.9632	0.15669
Cp1188	Positive	217.097	1.327	1.1693	0.4478	1.119	0.9548	1.467	0.38764	1.4464	0.44089
Cp1189	Positive	449.807	11.276	2.4107	0.0040858	2.4736	0.0016837	2.9859	0.046953	2.9132	0.067526
Cp119	Positive	297.338	9.795	1.8746	0.52544	6.2947	0.34827	5.6687	0.28307	2.3638	0.83374
Cp1190	Positive	263.025	8.007	0.63638	0.034028	0.89686	0.45632	0.94528	0.62833	0.92171	0.63463
Cp1191	Positive	182.057	8.995	0.89217	0.83429	0.97106	0.83168	0.68444	0.23092	0.91279	0.84514
Cp1192	Positive	541.415	10.871	1.5173	0.20211	1.364	0.34855	1.1863	0.63179	0.86083	0.74359
Cp1193	Positive	360.062	2.958	0.5651	0.21861	0.91524	0.89421	0.69267	0.37114	1.139	0.9748
Cp1194	Positive	499.224	5.934	1.2137	0.98019	1.3366	0.81251	0.97516	0.56979	0.47991	0.24506
Cp1195	Positive	320.148	5.926	3.3212	0.071987	2.9722	0.13518	1.8753	0.2456	0.76235	0.28824
Cp1196	Positive	150.089	6.398	32.859	0.00014679	22.346	0.0019866	15.668	0.080882	19.94	0.13974
Cp1197	Positive	189.03	3.684	1.6065	0.017283	1.7237	0.021695	1.6573	0.0722	1.7331	0.16608
Cp1198	Positive	292.188	6.56	0.46101	0.45691	1.7347	0.097814	1.0272	0.94134	2.0039	0.8087
Cp1199	Positive	145.052	2.812	0.96085	0.97004	1.0135	0.39471	0.91936	0.7563	0.27708	0.19901
Cp12	Positive	301.189	2.323	0.86008	0.33957	1.0142	0.86297	1.0091	0.7403	1.0897	0.71732
Cp120	Positive	482.326	10.604	2.4534	0.008393	2.48	0.0096881	2.1252	0.11702	1.8713	0.064595
Cp1200	Positive	266.08	6.857	0.44062	0.59173	0.47844	0.47717	0.55273	0.93917	0.47389	0.68408
Cp1201	Positive	276.172	8.99799	0.76249	0.24531	0.93231	0.6823	0.7139	0.18131	0.96891	0.93264
Cp1202	Positive	451.29	12.507	1.2719	0.70521	0.79411	0.59499	0.80134	0.7067	1.1382	0.6096
Cp1203	Positive	518.857	11.299	2.5838	0.0029883	3.5371	0.00053591	3.8013	0.00092118	4.0902	0.037203
Cp1204	Positive	244.177	3.47	2.9981	0.38412	2.4202	0.49351	2.5725	0.16062	1.2542	0.66707
Cp1205	Positive	503.312	11.249	0.60927	0.28302	0.79572	0.43281	0.53542	0.31018	0.25847	0.11656
Cp1206	Positive	531.383	11.174	1.7644	0.0030641	2.2993	0.00036013	1.9023	0.053496	2.0503	0.036726
Cp1207	Positive	347.201	5.642	0.39398	0.00055366	0.51502	0.21984	0.73758	0.36086	0.82635	0.37764
Cp1208	Positive	112.089	9.391	1.4667	0.033208	1.4705	0.065073	1.524	0.022208	1.4108	0.29903
Cp1209	Positive	534.894	13.311	13.343	0.50585	1283.6	0.57616	20.625	0.50585	n.d.	n.d.
Cp121	Positive	152.12	9.392	1.4663	0.061522	1.4605	0.052148	1.5178	0.034474	1.376	0.30722
Cp1210	Positive	286.141	9.566	0.87387	0.90355	1.2747	0.29869	1.1336	0.67819	0.9918	0.63167
Cp1211	Positive	209.08	6.024	0.95909	0.25743	0.77525	0.71541	1.0805	0.64556	0.6305	0.90252
Cp1212	Positive	358.044	8.72601	0.61838	0.1837	0.63058	0.13584	0.48274	0.076051	0.93296	0.73907
Cp1213	Positive	660.348	10.782	0.61529	0.15826	1.0619	0.81586	0.75696	0.23439	0.59486	0.04832
Cp1214	Positive	558.172	7.086	1.2351	0.80391	1.5217	0.23328	1.0209	0.90426	0.95726	0.94328
Cp1215	Positive	290.12	11.314	0.29935	0.11895	0.48266	0.16765	0.34041	0.16011	1.0768	0.96185
Cp1216	Positive	581.271	7.311	4.9599	0.1081	4.5534	0.0031511	1.1941	0.76097	1.7337	0.93333
Cp1217	Positive	284.126	6.859	0.77769	0.66048	0.96461	0.91425	0.93086	0.94841	0.86755	0.97745
Cp1218	Positive	206.165	10.531	0.76535	0.22123	0.70302	0.2968	0.66345	0.28888	1.0427	0.78118
Cp1219	Positive	144.114	8.9	0.31132	0.014507	0.6371	0.2211	0.60996	0.22383	0.6881	0.46579
Cp122	Positive	218.167	10.521	1.0915	0.5148	0.91513	0.55993	0.82925	0.32551	0.99672	0.95024
Cp1220	Positive	238.07	5.973	1.0778	0.88271	1.2789	0.86788	1.1022	0.96859	1.0176	0.84762
Cp1221	Positive	468.828	10.629	2.4496	0.011526	2.371	0.015065	2.0242	0.15886	1.7017	0.12721
Cp1222	Positive	603.897	10.9	1.868	0.0071425	2.2593	0.025207	1.7844	0.49286	2.0393	0.048561
Cp1223	Positive	395.192	5.058	0.14416	0.0028157	0.57483	0.082992	0.59195	0.17659	0.56458	0.14701
Cp1224	Positive	166.027	10.032	n.d.	n.d.	n.d.	n.d.	343.92	0.50585	n.d.	n.d.
Cp1225	Positive	386.122	4.563	6.6182	0.0144	4.5117	0.00092098	5.8254	0.030266	4.4523	0.15384
Cp1226	Positive	429.223	4.447	0.85366	0.46587	1.0193	0.43623	1.9745	0.84811	0.94144	0.17093
Cp1227	Positive	294.094	6.65034	1.4815	0.25538	1.9016	0.27581	2.2519	0.9339	3.1286	0.017064
Cp1228	Positive	636.457	12.868	0.56165	0.31212	0.66384	0.19284	0.44115	0.20676	0.54127	0.27247
Cp1229	Positive	340.15	7.165	3.1983	0.023469	1.6886	0.3642	2.8584	0.32788	0.39444	0.81724
Cp123	Positive	354.272	11.571	1.7319	0.89014	1.5013	0.68838	1.328	0.48556	2.6903	0.54253
Cp1230	Positive	502.332	10.604	4.4862	0.011329	4.7115	1.52e-05	3.9878	0.017152	3.5989	0.091975
Cp1231	Positive	590.161	5.613	1.085	0.69432	1.5425	0.8572	1.105	0.96691	1.3698	0.41702
Cp1232	Positive	610.429	10.421	2.0433	0.17092	2.1097	0.025848	1.7273	0.19982	1.9136	0.13653
Cp1233	Positive	516.352	11.014	6.6711	0.0091834	6.1614	0.043161	6.2482	0.28407	5.4197	0.80801
Cp1234	Positive	448.064	5.633	1.3301	0.083611	1.197	0.44295	1.5007	0.21691	1.5016	0.16449
Cp1235	Positive	262.229	11.453	0.60933	0.29439	0.93086	0.63018	0.49444	0.13595	0.76215	0.72462
Cp1236	Positive	190.171	9.553	1.762	0.0037881	1.493	0.33405	1.0513	0.15016	1.8397	0.55177
Cp1237	Positive	200.117	8.091	1.231	0.72065	1.5389	0.52133	1.6306	0.42447	0.00051569	0.13403
Cp1238	Positive	210.047	6.532	1.9146	0.064031	1.6914	0.13239	1.6685	0.84428	1.7046	0.29028
Cp1239	Positive	459.157	11.25	0.78961	0.39402	0.99028	0.67694	0.75974	0.35104	0.6742	0.21792
Cp124	Positive	1198.01	6.09	1.4934	0.73428	4.5739	0.12946	1.5626	0.9451	1.0817	0.77499
Cp1240	Positive	593.231	7.251	3.1096	0.38975	3.1292	0.19499	2.0457	0.1243	0.70176	0.56955
Cp1241	Positive	296.075	11.444	0.95336	0.39898	0.86943	0.39882	0.58271	0.19435	0.76349	0.39748
Cp1242	Positive	261.075	9.062	0.43099	0.14864	0.83179	0.30836	0.80995	0.42813	0.92632	0.64013
Cp1243	Positive	472.067	3.652	3.1465	0.00032807	2.4417	0.0047023	2.6136	0.0077146	2.5202	0.060203
Cp1244	Positive	414.206	10.023	1.8681	0.16242	1.6425	0.062718	1.4478	0.68709	1.5483	0.69544
Cp1245	Positive	199.193	9.978	1.1379	0.34844	0.96828	0.88991	0.90245	0.71243	0.69392	0.23941
Cp1246	Positive	251.206	11.804	0.92556	0.96988	1.1657	0.3161	1.1565	0.56646	0.97488	0.78231
Cp1247	Positive	395.084	3.91	1.3657	0.15748	2.5194	0.00012044	2.594	0.03947	2.8294	0.089987
Cp1248	Positive	582.391	10.932	1.6176	0.23482	2.554	0.10968	2.6178	0.04696	2.0316	0.07503
Cp1249	Positive	515.847	11.331	1.2731	0.18209	1.9393	0.15643	1.62	0.45803	2.5465	0.11391
Cp125	Positive	496.343	11.022	1.6379	0.21615	2.2363	0.0063477	2.3211	0.12166	2.0216	0.076166
Cp1250	Positive	162.067	7.999	0.85177	0.52826	1.0032	0.91761	0.98174	0.88556	0.67286	0.20625
Cp1251	Positive	559.356	10.525	0.61928	0.11627	1.1669	0.65698	1.2114	0.58517	1.1589	0.96328
Cp1252	Positive	270.216	10.318	2.7492	0.010012	3.0029	0.00015147	3.1092	0.014427	2.6778	0.046472
Cp1253	Positive	206.058	6.24	9.5203	0.054916	6.5567	0.11579	10.619	0.002593	6.2674	0.048375
Cp1254	Positive	430.805	11.272	1.7319	0.10644	2.4694	0.010429	2.1231	0.10351	2.4788	0.14405
Cp1255	Positive	396.196	10.851	0.92225	0.50651	0.97398	0.72159	0.95041	0.62893	0.97711	0.77009
Cp1256	Positive	311.316	13.241	0.77433	0.60031	0.92706	0.82083	0.67581	0.40143	0.80711	0.78454
Cp1257	Positive	470.149	11.451	567.22	0.098117	n.d.	n.d.	n.d.	n.d.	n.d.	n.d.
Cp1258	Positive	430.377	11.796	4.4454	0.54958	4.5871	0.0019649	3.8389	0.14282	6.7149	0.081087
Cp1259	Positive	241.24	11.355	1.0324	0.78894	0.99929	0.87813	0.67822	0.38968	0.73087	0.39666
Cp126	Positive	283.287	12.955	0.83298	0.68808	1.0124	0.84939	0.70619	0.32716	0.5619	0.24533
Cp1260	Positive	256.177	3.062	1.1714	0.64282	1.2404	0.28897	1.2408	0.69493	1.2673	0.77068
Cp1261	Positive	346.163	7.768	1.9699	0.18567	2.4523	0.8344	1.706	0.78144	0.68111	0.32535
Cp1262	Positive	371.341	10.531	1.233	0.2776	1.019	0.98525	0.88586	0.60032	1.1157	0.66577
Cp1263	Positive	667.429	7.724	4.018	0.00095926	1.4552	0.11985	1.9441	0.10751	2.2887	0.11792
Cp1264	Positive	225.173	12.343	1.91	0.1157	1.714	0.18534	1.0302	0.53452	2.504	0.5627
Cp1265	Positive	152.117	9.549	4.2776	0.009893	4.5182	0.044942	4.5273	0.11468	4.2946	0.41625
Cp1266	Positive	160.088	8.995	0.70581	0.1408	0.93744	0.56758	0.70139	0.17072	0.88516	0.62331
Cp1267	Positive	172.073	4.763	0.74118	0.51858	1.2932	0.34924	1.2635	0.3806	0.98904	0.91455
Cp1268	Positive	212.14	9.756	4.3779	0.29756	4.8139	0.20908	6.2566	0.01824	5.832	0.10644
Cp1269	Positive	371.963	7.299	0.54533	0.28541	0.75299	0.20783	0.68426	0.14572	1.1018	0.85255
Cp127	Positive	729.791	6.092	1.353	0.46573	2.3112	0.05636	1.26	0.9429	1.182	0.45368
Cp1270	Positive	372.051	5.179	1.2508	0.5273	1.1345	0.65925	1.3266	0.63835	1.0399	0.73013
Cp1271	Positive	369.165	4.612	1.3108	0.58138	2.2669	0.50696	1.5935	0.88645	1.3429	0.93225
Cp1272	Positive	766.512	10.759	1.579	0.049215	1.5621	0.03781	1.3669	0.25055	1.198	0.47852
Cp1273	Positive	256.133	6.952	4.6114	0.28577	5.9064	0.089901	4.27	0.30991	1.4779	0.98474
Cp1274	Positive	699.95	10.374	2.5282	0.073208	3.7099	0.0016371	2.476	0.11293	2.0163	0.25261
Cp1275	Positive	275.104	7.907	0.66535	0.47999	1.2988	0.52278	1.2489	0.29704	0.75752	0.63159
Cp1276	Positive	656.421	10.428	2.6191	0.074403	3.6876	0.0012993	2.4348	0.10046	2.4732	0.22533
Cp1277	Positive	324.131	4.303	1.4948	0.045497	1.2961	0.28899	1.416	0.46398	1.6004	0.20285
Cp1278	Positive	266.078	3.655	0.83988	0.77776	1.0081	0.19326	0.55379	0.69002	0.25311	0.50522
Cp1279	Positive	331.321	9.635	4.3944	0.11904	3.4294	0.1998	1.0108	0.68513	2.7687	0.18679
Cp128	Positive	438.315	12.207	1.5567	0.71405	2.6322	0.22988	2.9844	0.041623	1.8377	0.40114
Cp1280	Positive	152.047	4.874	0.74121	0.28819	0.8527	0.59643	0.9723	0.85735	0.96053	0.96624
Cp1281	Positive	369.233	4.999	1.777	0.12281	1.562	0.19887	1.4259	0.48257	1.6179	0.18655
Cp1282	Positive	390.103	10.693	0.72318	0.25725	0.75153	0.25928	0.50073	0.2086	0.83741	0.4784
Cp1283	Positive	343.035	6.26	1.7443	0.85952	2.3044	0.75707	1.8059	0.83805	1.358	0.63866
Cp1284	Positive	282.256	11.492	0.45078	0.012065	0.59782	0.036744	0.43053	0.0094428	0.42032	0.0063217
Cp1285	Positive	553.237	6.23	2.1505	0.090732	2.3012	0.63629	2.7961	0.12796	2.4159	0.73167
Cp1286	Positive	628.417	10.999	1.6834	0.016992	2.0637	0.0022736	1.5806	0.095639	1.9241	0.044328
Cp1287	Positive	463.148	4.979	2.3364	0.0080583	2.9749	1.77e-06	3.615	0.014095	5.0369	0.0096234
Cp1288	Positive	296.148	3.634	1.2968	0.30193	1.7118	0.065889	1.6349	0.3683	1.4738	0.39577
Cp1289	Positive	344.056	8.342	0.26751	0.081509	0.36365	0.16764	0.36793	0.16287	0.37345	0.20142
Cp129	Positive	454.344	10.21	2.7363	0.037994	0.80049	0.55997	0.56096	0.21537	1.9017	0.41303
Cp1290	Positive	440.356	11.785	1.2884	0.36645	0.88601	0.65375	0.9088	0.83617	0.97854	0.80151
Cp1291	Positive	222.092	9.051	0.57126	0.11929	0.81118	0.33922	0.79507	0.40569	0.68439	0.2544
Cp1292	Positive	432.17	10.474	1.1213	0.70001	1.0575	0.71334	0.94064	0.58948	1.1173	0.72453
Cp1293	Positive	562.224	7.09	4.3344	0.035365	3.6587	0.18877	1.6121	0.61496	1.5201	0.66343
Cp1294	Positive	514.329	10.558	1.5563	0.035624	1.2364	0.83315	1.5759	0.20361	1.4672	0.4498
Cp1295	Positive	244.104	8.718	0.84742	0.5824	0.84619	0.45614	0.67361	0.20041	0.79657	0.53517
Cp1296	Positive	280.044	9.844	0.31531	0.090317	0.56156	0.19395	0.34391	0.18704	0.81868	0.66778
Cp1297	Positive	178.098	6.835	1.6319	0.59533	0.72071	0.26422	1.0063	0.19348	0.39701	0.10651
Cp1298	Positive	336.014	2.04	1.0047	0.26922	1.6013	0.0089727	1.5802	0.56459	1.0783	0.97832
Cp1299	Positive	588.266	6.093	3.4939	0.39193	3.5695	0.59526	3.8949	0.42545	3.6432	0.17526
Cp13	Positive	162.053	6.094	1.3061	0.45411	2.0538	0.046331	1.2219	0.87302	1.3037	0.38557
Cp130	Positive	227.224	10.906	1.0665	0.61048	1.0409	0.93844	0.71304	0.3107	0.7629	0.53386
Cp1300	Positive	433.269	11.251	0.69637	0.17085	0.87724	0.63111	0.70299	0.22399	0.63853	0.1133
Cp1301	Positive	427.794	11.15	1.7665	0.0070314	2.0023	0.0038988	1.9714	0.88538	1.8157	0.23064
Cp1302	Positive	567.158	5.047	1.5239	0.30007	2.3867	0.74288	1.2511	0.96053	0.92134	0.77956
Cp1303	Positive	258.181	8.622	1.6778	0.086079	1.5807	0.073679	1.6331	0.88963	1.6458	0.62004
Cp1304	Positive	487.694	6.095	1.4239	0.21262	2.5001	7.03e-05	1.4859	0.23469	1.5513	0.15488
Cp1305	Positive	286.143	11.248	0.76797	0.58305	0.85475	0.60896	0.57068	0.18237	0.46444	0.14396
Cp1306	Positive	481.216	7.239	1.2342	0.62187	1.6936	0.19344	1.5387	0.20379	1.2364	0.66302
Cp1307	Positive	493.833	11.364	1.7431	0.0093609	1.9127	0.12807	1.4774	0.78005	2.18	0.11808
Cp1308	Positive	389.217	9.519	0.94399	0.91008	0.94067	0.76044	0.81657	0.40417	0.90815	0.59381
Cp1309	Positive	374.193	7.455	2.1656	0.08508	2.3511	0.0092812	2.2061	0.055497	1.6627	0.39929
Cp131	Positive	498.339	11.168	0.43268	0.57392	0.56966	0.79539	0.29716	0.48101	0.11297	0.16817
Cp1310	Positive	519.826	10.448	2.0939	0.0049931	1.0345	0.87937	1.114	0.89409	1.508	0.33006
Cp1311	Positive	284.092	4.075	0.43327	0.88215	0.53398	0.96714	0.17692	0.35106	0.41654	0.50153
Cp1312	Positive	224.035	6.284	0.25769	0.039782	0.64688	0.35505	0.72409	0.20305	0.7722	0.10119
Cp1313	Positive	877.634	11.272	2.01	0.0078944	2.2651	0.00363	2.1927	0.1228	2.1249	0.046995
Cp1314	Positive	236.106	9.16601	2.4758	0.0048698	2.5709	0.0033191	3.2921	0.069298	2.9183	0.042427
Cp1315	Positive	393.213	5.545	117.47	0.50585	884.97	0.69107	751.74	0.18816	n.d.	n.d.
Cp1316	Positive	288.02	3.976	0.96065	0.8315	1.5982	0.048331	1.2672	0.60255	1.3451	0.32564
Cp1317	Positive	114.068	9.826	0.97804	0.60023	1.5979	0.95297	0.64928	0.38741	0.53123	0.29083
Cp1318	Positive	553.161	4.841	0.89854	0.50902	1.2156	0.48804	1.483	0.50867	1.1708	0.72028
Cp1319	Positive	535.147	6.095	1.1351	0.67274	1.5157	0.023423	1.099	0.97728	1.4246	0.25092
Cp132	Positive	745.552	11.216	2.4732	0.0099631	2.7075	0.00539	2.1728	0.1301	1.6779	0.12389
Cp1320	Positive	606.906	11.02	2.0446	0.068946	3.5645	0.00061827	2.2582	0.072355	2.364	0.20345
Cp1321	Positive	300.122	4.641	2.8635	0.020077	2.206	0.21006	2.3192	0.16056	1.8908	0.15038
Cp1322	Positive	202.085	5.127	1.5446	0.54435	1.686	0.86423	1.1458	0.99513	0.52407	0.24368
Cp1323	Positive	475.222	4.64	3.0833	0.0035625	2.2723	0.0050588	2.1315	0.15578	2.1173	0.062799
Cp1324	Positive	309.303	13.231	1.3445	0.91541	1.0211	0.50832	0.9617	0.51982	1.259	0.96113
Cp1325	Positive	166.135	9.395	1.5454	0.021005	1.6155	0.01465	1.6013	0.04393	1.5328	0.18341
Cp1326	Positive	204.089	3.185	0.50823	0.2254	0.66848	0.3406	0.65809	0.28044	0.38161	0.1194
Cp1327	Positive	218.173	10.125	1.1576	0.63421	1.1237	0.8317	0.88842	0.70656	1.3319	0.94129
Cp1328	Positive	473.166	2.952	1.8383	0.0070656	1.7322	0.045136	2.0003	0.11584	1.9041	0.10922
Cp1329	Positive	325.21	4.406	0.73656	0.33165	1.2247	0.35771	1.4038	0.54554	1.2544	0.63439
Cp133	Positive	430.303	11.434	1.5901	0.27742	1.9565	0.036226	2.6452	0.23189	2.5855	0.049432
Cp1330	Positive	335.048	8.357	2.6686	0.04055	2.8784	0.0083793	2.4625	0.64333	6.5908	0.050567
Cp1331	Positive	226.083	8.928	0.96689	0.294	1.7299	0.41682	1.1743	0.1699	0.49033	0.28863
Cp1332	Positive	582.354	10.319	2.1812	0.094929	1.4471	0.32832	2.3133	0.48861	1.1698	0.3734
Cp1333	Positive	333.96	5.729	0.56802	0.037763	0.76032	0.14929	0.72551	0.099917	0.86844	0.33424
Cp1334	Positive	511.408	10.932	0.95376	0.93154	0.86029	0.52024	0.65807	0.22953	1.1712	0.58259
Cp1335	Positive	454.345	10.286	1.3652	0.25592	0.37517	0.22565	0.40632	0.066127	1.3086	0.41909
Cp1336	Positive	596.203	4.833	2.0978	0.0011758	1.5793	0.095128	2.1517	0.039171	1.906	0.056496
Cp1337	Positive	418.162	4.073	2.4621	0.0010966	1.7363	0.90791	1.3471	0.47979	1.576	0.27185
Cp1338	Positive	555.433	10.913	0.79317	0.2639	0.99739	0.65433	0.7937	0.31651	1.0792	0.64335
Cp1339	Positive	128.12	9.5	0.24632	0.070569	0.51467	0.22279	0.61912	0.32188	0.50247	0.0025308
Cp134	Positive	268.059	5.735	1.5697	0.45177	1.6378	0.36377	1.4274	0.47233	0.82987	0.47181
Cp1340	Positive	536.137	6.095	1.102	0.4936	1.2266	0.076605	0.97251	0.78129	1.0988	0.59288
Cp1341	Positive	304.151	6.356	1.3354	0.53943	1.7069	0.16776	1.5693	0.29343	1.1201	0.66208
Cp1342	Positive	272.089	4.09	0.77605	0.30414	1.1903	0.80247	1.1763	0.98889	1.2671	0.8316
Cp1343	Positive	828.472	12.957	0.9142	0.74627	1.7281	0.012725	1.5113	0.24059	1.8091	0.097082
Cp1344	Positive	515.288	9.426	0.79899	0.27378	0.82789	0.59168	0.86865	0.46192	0.84091	0.44675
Cp1345	Positive	471.821	11.396	2.0634	0.42507	2.5979	0.027981	2.368	0.59743	3.0211	0.20927
Cp1346	Positive	280.057	6.09	1.1282	0.46548	1.2733	0.084033	0.96133	0.81747	1.1292	0.53515
Cp1347	Positive	575.325	11.884	0.98221	0.85383	1.0315	0.78593	0.86932	0.24629	1.1334	0.39328
Cp1348	Positive	291.167	8.537	0.96166	0.90644	1.3535	0.84038	2.1417	0.78295	0.83027	0.9719
Cp1349	Positive	230.079	7.928	1.0206	0.54295	1.7673	0.6874	1.6366	0.49457	0.79761	0.36993
Cp135	Positive	474.329	11.209	1.3307	0.30957	1.9739	0.02331	1.5985	0.16261	1.6043	0.11725
Cp1350	Positive	562.385	11.233	2.4699	0.042294	3.1392	0.0094677	2.2054	0.37555	2.0712	0.382
Cp1351	Positive	619.419	10.465	4.9927	0.0010605	3.5109	0.044873	1.8593	0.10753	1.7119	0.18865
Cp1352	Positive	413.059	7.388	0.94761	0.53883	0.71896	0.15284	0.8969	0.41311	0.8888	0.43981
Cp1353	Positive	632.433	11.806	1.6374	0.81754	2.0108	0.00085302	1.4048	0.70344	1.6826	0.55137
Cp1354	Positive	88.0529	2.837	1.3992	0.58716	1.887	0.09648	1.2579	0.94174	0.80566	0.57292
Cp1355	Positive	408.335	9.036	2.319	0.0020531	0.50766	0.10457	0.69413	0.44141	2.3476	0.076278
Cp1356	Positive	530.148	6.091	1.2849	0.25599	1.5768	0.034374	1.0657	0.59118	1.2773	0.2931
Cp1357	Positive	275.993	6.56	0.90583	0.65167	1.812	0.040947	0.99815	0.81007	1.4448	0.84694
Cp1358	Positive	106.078	9.394	1.2256	0.34199	1.2455	0.30285	1.0487	0.58658	1.1567	0.69427
Cp1359	Positive	379.09	4.113	2.3573	0.012054	3.0051	0.0017912	2.733	0.8893	3.347	0.11241
Cp136	Positive	162.053	3.572	0.78464	0.37652	1.0983	0.91275	0.76558	0.36169	1.2394	0.98995
Cp1360	Positive	218.168	10.301	1.4056	0.82503	0.4445	0.32472	0.46333	0.24808	1.1621	0.4059
Cp1361	Positive	518.356	11.463	1.2587	0.45742	1.4899	0.5298	1.3107	0.67527	1.4332	0.46868
Cp1362	Positive	198.046	3.987	1.1791	0.64821	0.75791	0.97203	0.61781	0.4213	0.96151	0.97556
Cp1363	Positive	572.276	10.476	1.0044	0.87839	1.0915	0.4766	0.95144	0.65103	1.1132	0.55823
Cp1364	Positive	572.335	11.449	3.9404	0.045262	2.4255	0.35889	2.3401	0.76322	2.5778	0.77771
Cp1365	Positive	369.105	1.793	1.5029	0.80544	1.545	0.05469	1.6305	0.32195	2.0028	0.29078
Cp1366	Positive	358.052	5.73	0.99394	0.73721	1.1338	0.9466	1.052	0.81118	0.69194	0.20875
Cp1367	Positive	451.291	12.342	1.8515	0.46282	2.4888	0.055456	1.8405	0.29839	2.2442	0.57484
Cp1368	Positive	308.11	5.739	0.88812	0.86683	1.4473	0.75892	0.88523	0.50675	1.5764	0.86202
Cp1369	Positive	836.542	10.811	0.95613	0.35009	1.1141	0.38225	0.92286	0.24759	0.86219	0.39502
Cp137	Positive	504.339	10.577	2.284	0.010103	2.423	0.010624	2.022	0.11116	1.8582	0.10627
Cp1370	Positive	416.275	12.442	1.1425	0.47284	1.9284	0.070946	1.2749	0.70854	1.7323	0.15433
Cp1371	Positive	388.192	9.05499	1.8134	0.19107	1.1994	0.65391	1.0591	0.58708	1.5876	0.095109
Cp1372	Positive	366.026	6.659	1.4654	0.81013	1.8638	0.88503	1.6618	0.82202	1.7934	0.33452
Cp1373	Positive	706.387	13.586	1.6084	0.044945	2.3997	0.06703	2.5865	0.022856	3.9943	0.095476
Cp1374	Positive	212.174	9.268	0.82849	0.44347	1.1184	0.60306	1.1566	0.57493	0.94115	0.96213
Cp1375	Positive	493.144	4.513	0.4069	0.1614	0.66131	0.28013	0.65688	0.35715	0.4224	0.23443
Cp1376	Positive	219.138	2.338	0.66961	0.36231	0.99377	0.6677	1.0105	0.53195	0.77483	0.37091
Cp1377	Positive	518.355	11.141	1.7826	0.018224	2.2383	0.005142	1.9129	0.11304	2.0511	0.0424
Cp1378	Positive	373.137	5.425	1.5488	0.25794	1.9158	0.849	1.3042	0.47317	1.0165	0.45658
Cp1379	Positive	459.318	8.39899	1.5838	0.36328	1.1481	0.87719	0.89777	0.57951	0.97185	0.9732
Cp138	Positive	106.063	5.908	0.4983	0.052207	1.1538	0.93654	0.98221	0.84698	1.1256	0.71762
Cp1380	Positive	150.14	9.387	1.4342	0.045664	1.5343	0.02549	1.5887	0.015229	1.5488	0.13041
Cp1381	Positive	579.393	10.495	1.7832	0.83705	2.6481	0.20308	2.2999	0.094505	2.1454	0.25404
Cp1382	Positive	518.255	12.647	0.77004	0.20941	0.89506	0.42611	0.69123	0.13063	0.97034	0.71518
Cp1383	Positive	219.182	1.867	0.81899	0.46345	0.93501	0.69914	0.91182	0.57557	1.0659	0.76138
Cp1384	Positive	481.176	4.75	0.61986	0.06564	0.76281	0.1952	0.80337	0.31511	0.85948	0.49631
Cp1385	Positive	428.11	6.312	0.69227	0.39705	1.1957	0.38647	1.0909	0.68626	1.5245	0.3529
Cp1386	Positive	150.017	2.848	0.47741	0.24604	0.75982	0.34804	0.7148	0.27903	0.84337	0.47491
Cp1387	Positive	607.379	5.467	1.0209	0.65692	0.95156	0.88372	0.82897	0.74387	1.4325	0.26422
Cp1388	Positive	370	6.311	0.5429	0.25573	1.1193	0.56844	1.1184	0.43521	1.3759	0.55966
Cp1389	Positive	601.428	11.361	1.9478	0.28201	2.5745	0.030002	2.3525	0.13048	3.7049	0.02622
Cp139	Positive	811.035	3.292	0.309	0.74619	0.24124	0.62387	0.62334	0.65847	0.80974	0.98437
Cp1390	Positive	516.093	4.345	0.69041	0.20028	1.2061	0.66833	0.82671	0.47904	0.90814	0.42137
Cp1391	Positive	477.184	4.017	2.803	0.084463	3.6338	0.16694	2.124	0.18452	2.6982	0.37059
Cp1392	Positive	275.1	2.832	1.4561	0.58829	2.3395	0.078498	1.9909	0.81581	2.8472	0.24657
Cp1393	Positive	337.138	3.843	0.97591	0.50655	1.483	0.47811	1.6278	0.93786	0.74152	0.44754
Cp1394	Positive	130.043	4.892	1.3449	0.65568	1.0171	0.49432	1.1445	0.39438	0.94549	0.20982
Cp1395	Positive	155.006	3.353	0.659	0.94118	1.8766	0.078361	1.2916	0.91215	1.8242	0.26556
Cp1396	Positive	400.212	10.998	1.6235	0.43731	1.8449	0.89064	0.63474	0.37091	0.58521	0.43276
Cp1397	Positive	234.995	5.973	1.1277	0.78097	1.0771	0.70601	1.3717	0.038475	0.91666	0.77652
Cp1398	Positive	258.172	7.342	0.22729	0.040976	0.64875	0.20658	0.77797	0.34548	0.7853	0.40666
Cp1399	Positive	279.003	5.727	0.63449	0.044774	0.82829	0.19713	0.75544	0.084929	0.9504	0.62078
Cp14	Positive	281.271	12.14	0.53244	0.14198	0.68106	0.24525	0.54456	0.15473	0.66484	0.43452
Cp140	Positive	102.047	1.544	0.7892	0.17829	0.81949	0.18747	0.66878	0.077034	0.69925	0.15163
Cp1400	Positive	185.016	5.722	0.32386	0.053299	0.47736	0.084289	0.52427	0.21093	0.84499	0.39103
Cp1401	Positive	320.019	4.345	0.76215	0.26488	1.2045	0.41644	0.6483	0.12092	0.82491	0.38901
Cp1402	Positive	228.012	4.238	0.726	0.38377	0.96393	0.55413	0.93145	0.58953	1.1822	0.43467
Cp1403	Positive	330.274	10.737	1.595	0.13894	0.85729	0.64017	0.66812	0.66491	0.71584	0.55197
Cp1404	Positive	488.222	7.447	0.58027	0.2748	0.97223	0.96169	1.0336	0.67641	1.4525	0.33572
Cp1405	Positive	638.437	11.166	0.4909	0.55231	0.62287	0.33814	0.34605	0.2334	0.46215	0.40791
Cp1406	Positive	349.188	4.178	0.59456	0.26521	1.1208	0.61793	0.90189	0.49703	1.2509	0.40137
Cp1407	Positive	360.063	3.227	0.6045	0.39425	0.84874	0.64662	0.72611	0.42267	1.0674	0.97197
Cp1408	Positive	964.676	10.436	2.1861	0.010971	1.0675	0.90539	1.2058	0.78704	1.4975	0.44394
Cp1409	Positive	210.088	3.651	3.8437	0.00019109	2.8602	0.0047354	3.0577	0.0089138	2.9918	0.027947
Cp141	Positive	536.142	12.246	1.2921	0.81908	1.1598	0.80772	0.95141	0.46743	1.3309	0.61044
Cp1410	Positive	515.333	10.558	1.7388	0.019911	1.6629	0.11248	1.8097	0.0862	1.6399	0.063203
Cp1411	Positive	259.142	6.814	1.5954	0.048635	2.0664	0.00018052	1.2906	0.26	2.0322	0.13218
Cp1412	Positive	322	4.656	0.83526	0.36891	1.0003	0.8947	0.91058	0.53694	1.033	0.99089
Cp1413	Positive	437.096	3.741	2.318	0.7951	1.8326	0.3115	2.0818	0.87222	3.1967	0.75828
Cp1414	Positive	314.102	3.046	1.9036	0.033988	2.4219	0.0021906	2.5288	0.043451	2.5005	0.081004
Cp1415	Positive	244.105	8.609	0.93378	0.24818	0.76006	0.65099	0.58317	0.86391	0.86566	0.46232
Cp1416	Positive	418.283	12.506	1.5236	0.19119	1.8326	0.030669	0.94615	0.54578	1.2338	0.29036
Cp1417	Positive	750.395	11.236	0.65255	0.033946	0.85018	0.34684	0.93575	0.62318	0.99352	0.99355
Cp1418	Positive	251.205	11.801	0.74693	0.22152	0.97565	0.29195	1.0576	0.41565	1.1695	0.41415
Cp1419	Positive	344.056	6.663	0.45685	0.024369	0.64769	0.13705	0.55306	0.077383	0.59886	0.24294
Cp142	Positive	193.007	5.725	0.42834	0.041949	0.68113	0.12946	0.61729	0.11024	0.87222	0.43161
Cp1420	Positive	208.02	8.638	0.48214	0.046925	0.5295	0.1888	0.44581	0.1998	0.78691	0.31223
Cp1421	Positive	565.273	7.761	1.7084	0.54383	1.4762	0.11266	1.4284	0.66835	1.2213	0.55014
Cp1422	Positive	480.32	10.631	2.2695	0.088648	2.2801	0.081936	2.0997	0.4704	1.6788	0.2991
Cp1423	Positive	261.051	5.125	1.5248	0.26853	1.3592	0.36593	1.1544	0.75894	1.9939	0.25776
Cp1424	Positive	374.119	4.763	0.79784	0.95604	1.2089	0.25543	1.2568	0.40288	0.99562	0.72721
Cp1425	Positive	424.103	9.922	0.45095	0.056636	0.67037	0.14899	0.65207	0.23904	1.082	0.96372
Cp1426	Positive	603.899	11.048	1.6175	0.035019	2.5986	0.0025957	1.855	0.12523	1.9832	0.049446
Cp1427	Positive	190.167	11.808	0.93586	0.81237	0.85126	0.47394	0.8041	0.48483	0.72289	0.19634
Cp1428	Positive	377.335	11.591	0.82177	0.22053	0.99096	0.80054	0.74569	0.14893	0.77114	0.1641
Cp1429	Positive	338.16	12.037	8.1102	0.0039153	4.0603	0.59801	3.255	0.96683	6.7024	0.042591
Cp143	Positive	441.201	2.318	3.4825	0.72233	3.2903	0.0027268	5.0752	0.023524	3.3641	0.04625
Cp1430	Positive	690.206	8.957	0.39572	0.011213	0.79345	0.51348	0.84601	0.46313	0.90106	0.69192
Cp1431	Positive	491.357	11.528	1.857	0.65488	2.1042	0.84307	2.2944	0.96177	1.4861	0.25949
Cp1432	Positive	306.005	6.664	1.3192	0.59119	1.7281	0.61415	1.7395	0.87499	1.8382	0.85122
Cp1433	Positive	528.408	11.673	2.0854	0.63807	1.9251	0.49746	1.8489	0.40724	3.1691	0.10751
Cp1434	Positive	623.42	10.446	1.9453	0.63974	3.0821	0.1158	2.0611	0.65073	1.2039	0.98495
Cp1435	Positive	432.286	11.333	3.1159	0.015497	2.1404	0.58352	2.2945	0.162	0.9869	0.99405
Cp1436	Positive	340.173	4.038	1.1511	0.68848	1.5825	0.11188	1.3645	0.67953	1.4201	0.50679
Cp1437	Positive	416.244	11.568	0.54628	0.33639	0.87653	0.53584	0.54273	0.27237	0.72858	0.61927
Cp1438	Positive	254.153	8.727	1.5984	0.023524	0.84447	0.32331	2.1582	0.0033666	2.1197	0.0052363
Cp1439	Positive	636.378	12.651	0.7163	0.11855	0.84047	0.31979	0.60893	0.04494	0.80633	0.37301
Cp144	Positive	539.418	10.119	0.80788	0.42319	0.83765	0.42209	0.69024	0.20332	1.0859	0.74977
Cp1440	Positive	445.254	4.671	1.4916	0.12769	1.9171	0.53967	1.4407	0.85541	1.3544	0.91127
Cp1441	Positive	194.058	6.788	0.79008	0.40674	0.98454	0.93712	1.0005	0.96893	0.95292	0.93611
Cp1442	Positive	513.356	10.577	2.0746	0.018883	2.2619	0.012937	1.815	0.857	1.7468	0.1259
Cp1443	Positive	538.367	11.305	2.2957	0.42381	2.5603	0.48721	2.6034	0.096858	2.7927	0.22417
Cp1444	Positive	340.242	9.043	2.3992	0.065484	0.59106	0.64624	0.69429	0.8124	2.4908	0.23425
Cp1445	Positive	375.078	4.408	0.7489	0.20499	1.1493	0.53956	1.5427	0.40254	1.0767	0.97884
Cp1446	Positive	359.125	1.33	0.94272	0.84682	1.4795	0.040774	1.0982	0.62163	1.7704	0.27745
Cp1447	Positive	590.365	10.764	1.9099	0.035108	1.4495	0.98255	1.3991	0.50177	1.1771	0.73506
Cp1448	Positive	614.378	12.642	3.5868	0.13173	2.146	0.068856	2.019	0.40924	3.1077	0.11905
Cp1449	Positive	847.62	12.174	1.1205	0.74095	0.94193	0.57035	0.78059	0.55732	0.63237	0.33968
Cp145	Positive	602.4	10.466	13.486	0.011228	6.7821	0.20913	2.0833	0.90206	1.8033	0.28085
Cp1450	Positive	794.496	10.551	0.81299	0.46035	1.1422	0.55548	0.9902	0.76366	0.54065	0.30017
Cp1451	Positive	356.111	4.86	1.012	0.48881	1.4291	0.21625	1.5942	0.2731	1.2814	0.45458
Cp1452	Positive	224.034	6.789	0.25255	0.054501	0.51534	0.097354	0.6019	0.25076	0.83499	0.061494
Cp1453	Positive	205.074	4.947	1.8883	0.10331	2.2168	0.0030836	1.9911	0.49242	2.0574	0.84543
Cp1454	Positive	220.182	10.531	0.95542	0.68277	0.9144	0.48588	0.85051	0.40509	1.0188	0.96064
Cp1455	Positive	284.088	12.651	1.5348	0.19307	1.2116	0.68265	1.166	0.33878	1.054	0.92784
Cp1456	Positive	360.183	12.1	0.27752	0.084951	0.78662	0.5169	0.35531	0.1559	1.1181	0.96648
Cp1457	Positive	407.139	8.995	0.74976	0.21715	1.0165	0.93518	0.72136	0.21913	0.76845	0.44351
Cp1458	Positive	475.268	9.338	0.86891	0.39201	1.0676	0.32207	0.51112	0.1181	2.0718	0.63548
Cp1459	Positive	140.048	4.864	0.69032	0.18174	1.3276	0.49825	1.806	0.25101	1.0017	0.73678
Cp146	Positive	521.348	10.276	1.7151	0.19115	1.3386	0.58781	1.2777	0.44983	2.9748	0.2917
Cp1460	Positive	168.113	8.475	0.19458	0.07726	0.53431	0.25355	0.41309	0.22196	0.66265	0.51538
Cp1461	Positive	537.22	5.72	1.4745	0.088554	1.2553	0.21154	1.4626	0.70976	1.8345	0.29331
Cp1462	Positive	246.047	6.209	0.66441	0.97781	1.3406	0.87618	1.3853	0.85716	1.424	0.89055
Cp1463	Positive	446.813	10.656	2.2951	0.015031	2.1818	0.026992	1.8958	0.18847	1.6549	0.15264
Cp1464	Positive	356.018	3.352	0.60944	0.41527	1.4038	0.04238	1.0836	0.69183	1.2714	0.44852
Cp1465	Positive	563.257	7.178	1.7553	0.8437	2.1466	0.24126	1.9394	0.88668	1.5089	0.91031
Cp1466	Positive	736.281	6.089	2.1094	0.033442	2.8391	0.021587	1.9273	0.40513	1.4398	0.51515
Cp1467	Positive	94.0793	9.383	1.0787	0.74571	1.2005	0.42438	1.206	0.41999	1.0016	0.73508
Cp1468	Positive	334.02	6.09	849.61	0.010674	4824.8	0.22752	1011	0.099782	651.55	0.35592
Cp1469	Positive	304.113	4.408	0.86196	0.95317	1.4002	0.15244	1.8308	0.092449	1.3733	0.55537
Cp147	Positive	386.279	11.338	1.8042	0.49719	2.1574	0.23184	2.0842	0.47923	2.2875	0.8637
Cp1470	Positive	334.179	9.039	1.913	0.63768	0.71037	0.84254	0.41133	0.4193	0.39266	0.52418
Cp1471	Positive	246.122	1.406	1.8036	0.70494	1.6915	0.55421	1.0047	0.73751	0.0023985	0.35592
Cp1472	Positive	224.069	3.687	2.6452	0.0016725	2.2312	0.0366	2.606	0.010819	1.8978	0.18173
Cp1473	Positive	442.056	3.384	1.8209	0.0066703	1.4961	0.18462	2.015	0.042271	1.81	0.028699
Cp1474	Positive	549.389	11.255	0.49118	0.28756	0.76165	0.49641	0.43449	0.00334	0.62828	0.021913
Cp1475	Positive	300.219	8.606	0.17532	0.054427	0.46747	0.17146	0.38517	0.20672	0.43242	0.27795
Cp1476	Positive	489.298	11.249	1.0689	0.55467	1.0217	0.78776	0.79095	0.56563	0.70727	0.46382
Cp1477	Positive	456.123	3.576	0.85551	0.58956	1.3616	0.1236	0.94465	0.56056	0.8292	0.40142
Cp1478	Positive	218.105	4.297	2.1556	0.081712	1.4315	0.89849	1.4224	0.8953	0.9218	0.99898
Cp1479	Positive	497.391	10.899	1.0883	0.7583	1.0535	0.93037	0.8698	0.51688	0.86367	0.71611
Cp148	Positive	526.352	10.549	2.2458	0.014435	2.4603	0.0092562	2.0064	0.12555	1.8015	0.087655
Cp1480	Positive	148.016	9.053	0.73536	0.17597	0.84268	0.31378	0.86921	0.47083	0.76811	0.28016
Cp1481	Positive	435.792	10.685	3.6033	0.12571	3.6088	0.0026164	3.0536	0.3418	2.1823	0.49125
Cp1482	Positive	457.211	4.178	1.5882	0.060677	1.6244	0.00137	1.1936	0.68229	1.4593	0.52389
Cp1483	Positive	619.271	9.04199	1.4565	0.029355	0.79368	0.3672	0.82553	0.53123	1.478	0.16333
Cp1484	Positive	358.161	4.424	0.70433	0.14361	0.97782	0.74945	0.87533	0.49363	1.2128	0.66488
Cp1485	Positive	493.431	12.181	1.2364	0.41527	1.0792	0.47427	1.0022	0.83109	0.65621	0.3468
Cp1486	Positive	258.147	10.768	0.63073	0.36788	0.98685	0.56759	0.50513	0.23065	0.20912	0.07847
Cp1487	Positive	539.237	5.868	1.2415	0.56911	1.1435	0.96146	1.0562	0.56316	1.0124	0.9629
Cp1488	Positive	235.156	8.47	0.56582	0.24625	0.74869	0.30698	0.75708	0.21543	0.43165	0.12424
Cp1489	Positive	330.038	5.907	0.38397	0.17144	1.1311	0.73254	0.86335	0.57307	1.1013	0.80872
Cp149	Positive	628.395	13.126	1.8718	0.11704	1.3222	0.31769	1.3578	0.52392	2.7234	0.13565
Cp1490	Positive	619.263	4.992	3.0962	0.011717	1.8322	0.89037	2.0036	0.66255	2.1753	0.27871
Cp1491	Positive	226.085	10.039	0.78836	0.48723	1.4903	0.7579	1.2881	0.57799	0.14165	0.17404
Cp1492	Positive	437.129	4.24	8.3311	0.19659	3.4185	0.96284	5.5287	0.39323	4.7728	0.47252
Cp1493	Positive	290.236	9.395	3.373	0.24683	2.4526	0.43933	2.9321	0.4293	4.1409	0.19403
Cp1494	Positive	346.09	3.209	5.6698	0.0081436	4.7283	0.01416	3.9878	0.12458	4.1522	0.42559
Cp1495	Positive	715.296	9.03699	1.626	0.0080369	0.86051	0.50037	0.93223	0.88003	1.5849	0.12647
Cp1496	Positive	454.347	10.957	1.9688	0.034548	1.0984	0.38639	0.92452	0.7841	0.49609	0.90949
Cp1497	Positive	428.397	9.202	1.4245	0.59011	2.1259	0.25199	1.3729	0.93873	3.9957	0.18064
Cp1498	Positive	405.163	3.527	1.4962	0.15896	2.1525	0.090932	1.4671	0.18672	2.4813	0.24006
Cp1499	Positive	435.174	2.941	1.9479	0.43007	3.218	0.048461	2.0621	0.47375	2.3014	0.26571
Cp15	Positive	253.24	11.117	0.64773	0.432	0.62394	0.24302	0.3752	0.086867	0.51523	0.35163
Cp150	Positive	129.151	3.43	0.52701	0.0272	0.9572	0.54057	0.97459	0.62022	0.93851	0.65014
Cp1500	Positive	294.216	8.036	1.8075	0.48901	2.2371	0.62394	2.6779	0.26319	4.6309	0.49755
Cp1501	Positive	257.102	1.3	1.8771	0.40462	1.4197	0.74509	1.5295	0.44533	3.496	0.099666
Cp1502	Positive	148.063	5.33	0.76294	0.11187	0.82938	0.2339	0.82185	0.38635	0.86674	0.53103
Cp1503	Positive	331.225	4.82	0.28257	0.1179	0.68586	0.29262	0.68821	0.35203	0.91465	0.9853
Cp1504	Positive	191.058	3.946	3.7452	0.30771	4.2621	0.30959	3.971	0.55122	3.0969	0.86965
Cp1505	Positive	286.143	9.469	0.8047	0.36757	0.94473	0.46035	0.64575	0.41385	1.0616	0.68928
Cp1506	Positive	222.057	11.445	0.84294	0.26829	0.61089	0.10999	0.54746	0.19923	0.9061	0.42971
Cp1507	Positive	287.137	3.971	0.67417	0.38154	0.9319	0.90049	0.68158	0.39752	1.2146	0.48222
Cp1508	Positive	646.388	11.29	1.3434	0.23396	1.2142	0.97595	1.3593	0.83093	1.0738	0.91137
Cp1509	Positive	396.197	9.424	1.0732	0.63457	0.85501	0.48778	0.74174	0.32992	0.65128	0.34692
Cp151	Positive	166.048	5.727	0.61597	0.071992	0.79688	0.20067	0.76218	0.15778	1.0109	0.89561
Cp1510	Positive	281.112	2.443	1.0308	0.52588	1.546	0.29991	0.97673	0.72588	2.6625	0.22889
Cp1511	Positive	304.051	8.007	0.53921	0.018119	0.7595	0.16592	0.89413	0.49895	0.7518	0.20451
Cp1512	Positive	118.041	6.102	0.73702	0.10694	0.90394	0.62907	0.78408	0.43535	0.83551	0.38212
Cp1513	Positive	731.539	10.907	45.255	0.049095	39.291	0.029003	35.456	0.14522	20.586	0.11175
Cp1514	Positive	298.251	11.549	0.11596	0.071985	0.53874	0.48715	0.48628	0.38205	0.39649	0.49782
Cp1515	Positive	345.214	2.931	1.7092	0.064385	1.5085	0.022818	1.1009	0.83403	1.497	0.39369
Cp1516	Positive	387.257	11.013	0.38841	0.20938	0.53224	0.28837	0.36318	0.123	0.46604	0.038593
Cp1517	Positive	164.047	3.704	2.0002	0.029175	1.3688	0.34266	1.5891	0.21222	1.5487	0.18378
Cp1518	Positive	537.861	11.3	1.878	0.22269	2.2102	0.042861	2.2621	0.012895	2.9295	0.0068573
Cp1519	Positive	250.133	4.01	0.83925	0.97253	0.74455	0.80819	0.53925	0.85713	0.8583	0.63504
Cp152	Positive	481.179	3.552	0.7714	0.74654	0.95438	0.8794	0.40159	0.59313	0.46111	0.86017
Cp1520	Positive	449.807	11.436	5.163	0.22578	6.1802	0.017786	7.0444	0.031746	9.3305	0.052398
Cp1521	Positive	300.123	4.904	2.9424	0.11265	1.8939	0.20696	1.5836	0.22537	2.373	0.42274
Cp1522	Positive	240.076	3.963	0.72887	0.38471	1.3576	0.36988	1.454	0.53344	1.0425	0.89582
Cp1523	Positive	288.063	5.865	0.99805	0.99719	1.0234	0.43931	1.0235	0.55296	1.0403	0.43879
Cp1524	Positive	819.591	11.153	3.5514	0.017336	2.9085	0.28816	2.6241	0.11425	1.3899	0.90514
Cp1525	Positive	306.004	7.456	0.39775	0.28337	0.807	0.53965	0.89846	0.8488	1.0687	0.6483
Cp1526	Positive	582.39	11.086	1.5324	0.027717	1.5702	0.96544	1.507	0.16291	1.8545	0.040435
Cp1527	Positive	324.104	5.007	1.1709	0.25238	1.4638	0.012851	0.98535	0.91208	2.2256	0.092679
Cp1528	Positive	281.111	2.747	1.1038	0.99587	1.2406	0.68321	0.92135	0.95754	2.1784	0.2665
Cp1529	Positive	1014.67	11.306	1.92	0.018542	2.0969	0.0057597	2.0778	0.15756	1.7944	0.10757
Cp153	Positive	242.175	2.979	2.8253	0.10555	2.0451	0.0067814	1.7126	0.16316	1.3108	0.35113
Cp1530	Positive	397.258	11.431	0.99022	0.69593	0.81374	0.34747	0.885	0.59823	1.2308	0.34327
Cp1531	Positive	388.259	11.463	1.0582	0.30088	1.2015	0.8341	1.3807	0.57641	0.85411	0.49647
Cp1532	Positive	222.058	10.694	1.14	0.77591	0.99621	0.67558	0.59205	0.42089	1.1709	0.9139
Cp1533	Positive	424.102	9.79	0.56613	0.10556	0.74953	0.22795	0.67868	0.22508	1.1829	0.78819
Cp1534	Positive	306.056	7.79	0.76548	0.2993	1.023	0.5744	0.77003	0.21074	1.0748	0.84129
Cp1535	Positive	227.189	12.344	29.18	7.3558e-05	19.77	0.0020243	6.5231	0.10545	18.839	0.0081862
Cp1536	Positive	330.139	5.889	1.2474	0.40804	1.09	0.92917	1.1857	0.95154	1.1468	0.68606
Cp1537	Positive	288.159	7.604	0.78136	0.80907	1.3784	0.35883	0.92705	0.79753	2.3723	0.27347
Cp1538	Positive	385.137	4.218	3.569	0.0018737	2.4168	0.81576	3.0518	0.042652	2.29	0.16834
Cp1539	Positive	778.378	6.093	1.0861	0.65978	1.327	0.053428	0.94034	0.77175	1.0667	0.73111
Cp154	Positive	952.08	3.102	1.5923	0.51254	1.047	0.56347	1.9151	0.74175	2.2514	0.52343
Cp1540	Positive	370.315	9.158	0.15702	0.50388	0.35324	0.48945	0.29261	0.37522	0.090759	0.17792
Cp1541	Positive	429.222	3.871	0.86424	0.74985	1.4144	0.49219	0.68268	0.64587	0.80569	0.93837
Cp1542	Positive	475.22	4.268	8.0019	1.378e-05	3.609	0.30125	5.153	0.0012518	3.0134	0.14274
Cp1543	Positive	301.238	11.349	0.058333	0.00022947	0.066948	5.7e-07	0.2057	0.0014849	0.0020793	1.41e-07
Cp1544	Positive	579.907	12.527	3.7208	0.035214	2.9782	0.0011738	3.4465	0.061838	3.8334	0.17232
Cp1545	Positive	442.075	4.329	2.3545	0.076893	2.5682	0.50587	2.4288	0.4351	2.3589	0.26894
Cp1546	Positive	224.056	9.844	0.36217	0.075057	0.49097	0.10816	0.37556	0.16983	0.77342	0.36078
Cp1547	Positive	182.128	9.025	0.25474	0.13101	0.59523	0.41878	0.46165	0.12154	0.55814	0.42174
Cp1548	Positive	236.014	5.724	0.67685	0.13052	0.86165	0.35786	0.95427	0.63885	0.94051	0.61986
Cp1549	Positive	297.944	5.123	0.9383	0.50989	1.0707	0.6522	1.0164	0.97636	1.481	0.58602
Cp155	Positive	567.195	7.052	1.5957	0.23883	0.86409	0.22661	0.40565	0.93639	0.38301	0.62037
Cp1550	Positive	192.079	4.093	1.1716	0.97662	0.32688	0.27164	0.49801	0.63521	0.78854	0.63526
Cp1551	Positive	236.212	11.118	0.67926	0.46137	0.79782	0.42077	0.53885	0.11611	0.57722	0.38997
Cp1552	Positive	579.404	11.385	6.8877	0.00062437	7.9916	0.0028657	2.6441	0.32172	8.4483	0.015439
Cp1553	Positive	476.207	5.729	0.58797	0.039658	0.79518	0.18287	0.69705	0.029618	0.92671	0.52075
Cp1554	Positive	458.307	10.656	2.3496	0.077404	2.1689	0.0050494	2.1178	0.11451	1.6294	0.32108
Cp1555	Positive	391.126	5.966	0.64695	0.35703	0.91804	0.75113	0.75738	0.48481	2.702	0.078886
Cp1556	Positive	306.982	5.728	0.53802	0.27888	0.68028	0.3613	0.76987	0.13163	0.59931	0.30504
Cp1557	Positive	344.163	5.867	1.2424	0.54733	1.1767	0.78381	0.92662	0.35986	1.047	0.78548
Cp1558	Positive	548.881	11.107	1.9925	0.0022302	2.0867	0.035715	1.6684	0.43182	1.9605	0.26386
Cp1559	Positive	509.171	4.868	0.78944	0.32334	0.80297	0.27475	0.88359	0.53765	0.75107	0.35216
Cp156	Positive	426.296	10.56	1.3544	0.32732	1.1569	0.32704	0.08574	0.060746	0.21466	0.39001
Cp1560	Positive	424.332	10.529	0.90295	0.57901	0.89486	0.49665	0.91171	0.53288	0.91397	0.69213
Cp1561	Positive	550.113	8.28	0.64411	0.078049	0.82464	0.20209	1.0665	0.89531	1.2235	0.34243
Cp1562	Positive	491.345	10.604	2.0069	0.028167	1.867	0.85136	1.4514	0.4996	1.6157	0.2405
Cp1563	Positive	227.057	4.345	0.64806	0.30385	1.1158	0.58445	0.68954	0.37175	0.84008	0.73105
Cp1564	Positive	290.082	8.008	0.97874	0.33884	1.0825	0.37394	1.2531	0.27314	1.3647	0.34751
Cp1565	Positive	186.976	5.727	0.54249	0.22823	0.77827	0.49116	0.71608	0.20532	0.86016	0.49692
Cp1566	Positive	1008.11	1.325	0.66408	0.49397	1.3829	0.007853	0.83991	0.61159	1.4454	0.34464
Cp1567	Positive	427.794	11.309	1.5848	0.14997	2.0356	0.0016197	2.2736	0.088751	2.5114	0.067545
Cp1568	Positive	608.12	3.562	0.88391	0.72484	1.6386	0.015499	0.73606	0.87722	0.64131	0.72113
Cp1569	Positive	364.273	12.651	0.78571	0.55511	0.73874	0.29186	0.77166	0.47285	0.79999	0.65757
Cp157	Positive	118.099	4.405	0.78616	0.70074	1.5516	0.28682	1.9904	0.53511	1.3356	0.94398
Cp1570	Positive	305.198	5.077	0.28287	0.069251	0.61094	0.2912	0.60014	0.31787	0.7529	0.068904
Cp1571	Positive	395.978	5.865	1.3975	0.15921	1.3367	0.15138	1.5876	0.54613	1.1218	0.43522
Cp1572	Positive	290.045	3.887	0.55953	0.28147	0.61953	0.19047	0.53138	0.23016	0.38446	0.1171
Cp1573	Positive	344.22	11.225	1.3227	0.50471	1.0753	0.73019	2.0652	0.07508	3.0069	0.0019281
Cp1574	Positive	151.008	4.244	2.0863	0.93156	1.7639	0.9612	2.2071	0.92564	0.0052042	0.35592
Cp1575	Positive	475.22	4.187	3.9822	8.6802e-05	1.6149	0.87145	2.786	0.017358	1.852	0.23377
Cp1576	Positive	197.178	9.553	0.53919	0.56901	0.89099	0.82749	0.73635	0.89509	1.3151	0.36194
Cp1577	Positive	148.109	4.042	1.2563	0.88901	1.3958	0.048599	1.0141	0.81229	0.77748	0.58772
Cp1578	Positive	594.334	11.796	1.2221	0.29505	0.58244	0.2692	0.46193	0.20868	1.0305	0.98269
Cp1579	Positive	468.16	4.222	1.1207	0.40151	1.3234	0.063039	1.1306	0.77487	1.2985	0.3904
Cp158	Positive	748.497	10.868	0.8636	0.39181	1.0399	0.96515	0.93757	0.59923	1.0161	0.95552
Cp1580	Positive	396.021	1.322	0.88469	0.91746	1.3377	0.93822	1.0536	0.80079	1.5695	0.27764
Cp1581	Positive	511.185	4.657	0.60704	0.11431	0.71347	0.1771	0.76523	0.364	0.7983	0.53785
Cp1582	Positive	298.062	4.108	1.7625	0.20575	1.5832	0.57805	1.0026	0.39527	0.67608	0.29668
Cp1583	Positive	426.079	3.393	1.7359	0.52608	1.7253	0.87334	1.8604	0.86389	2.9444	0.26732
Cp1584	Positive	481.174	4.639	0.57147	0.28999	0.57396	0.27287	0.72207	0.32025	0.5978	0.29277
Cp1585	Positive	331.235	4.128	0.9737	0.70594	1.042	0.97054	0.99171	0.68045	1.2077	0.70511
Cp1586	Positive	414.205	9.893	1.233	0.21232	1.1907	0.79888	0.89261	0.38251	1.573	0.09589
Cp1587	Positive	298.114	6.804	0.54917	0.017042	0.44509	0.20559	0.38865	0.12666	0.5525	0.0065633
Cp1588	Positive	188.013	8.248	0.28646	0.028464	0.37721	0.037007	0.65216	0.19299	0.41477	0.12146
Cp1589	Positive	366.132	12.211	0.86045	0.35397	0.99112	0.032473	0.9605	0.24948	1.3051	0.37156
Cp159	Positive	167.035	4.407	0.73209	0.2638	1.3372	0.28661	1.6775	0.35309	1.2466	0.69585
Cp1590	Positive	198.051	2.646	1.1354	0.74783	1.1646	0.78906	1.2585	0.84179	1.3987	0.79301
Cp1591	Positive	554.31	9.157	0.87463	0.3566	0.94835	0.57678	0.89744	0.44864	1.115	0.42244
Cp1592	Positive	284.126	4.204	1.0349	0.69533	1.2882	0.16125	1.2358	0.9335	1.2203	0.39934
Cp1593	Positive	366.025	7.483	0.64429	0.083093	0.96579	0.79713	1.0415	0.99719	1.1116	0.83307
Cp1594	Positive	401.132	4.302	1.7302	0.021801	2.3986	0.00054327	2.3069	0.061652	3.2294	0.044283
Cp1595	Positive	164.041	5.64684	0.61607	0.0267	0.61258	0.32961	0.57315	0.064071	0.37744	0.0352
Cp1596	Positive	443.2	3.327	0.91854	0.53071	1.9344	0.027481	0.95939	0.49654	1.0561	0.56411
Cp1597	Positive	421.101	4.783	1.2179	0.28895	1.4716	0.29765	1.4768	0.49356	1.9516	0.40311
Cp1598	Positive	536.299	10.853	0.83108	0.23873	0.9693	0.68488	0.91007	0.47775	1.0525	0.91312
Cp1599	Positive	170.021	10.035	0.69114	0.45915	1.6359	0.84957	1.4896	0.80965	0.0021002	0.13451
Cp16	Positive	318.168	9.65	1.1501	0.53251	1.6237	0.92204	1.3621	0.68357	0.30947	0.023198
Cp160	Positive	288.157	8.09699	0.78864	0.74582	1.2269	0.5375	0.84472	0.64013	0.81088	0.96431
Cp1600	Positive	482.109	3.886	0.56502	0.048896	0.68152	0.33671	0.53882	0.28995	0.49627	0.23057
Cp1601	Positive	349.188	4.04	1.7353	0.12356	1.6134	0.0087239	1.5687	0.14908	1.5519	0.94854
Cp1602	Positive	124.015	10.592	1.9	0.46346	2.911	0.29457	2.4369	0.65837	0.0033086	0.35592
Cp1603	Positive	597.365	8.398	0.77148	0.23516	0.92153	0.50982	0.94542	0.61754	0.96582	0.80861
Cp1604	Positive	343.206	10.789	0.63631	0.053856	0.7928	0.13196	0.98578	0.78284	0.78126	0.054748
Cp1605	Positive	453.173	11.248	0.57582	0.29944	0.88025	0.33519	0.45016	0.28734	0.34927	0.24527
Cp1606	Positive	338.014	3.57	0.58425	0.25544	0.9421	0.67014	0.68779	0.15011	0.7098	0.24249
Cp1607	Positive	268.132	10.652	0.83542	0.4777	1.3642	0.84762	1.5017	0.9977	0.26514	0.20929
Cp1608	Positive	201.172	4.07	0.31426	0.021339	0.66166	0.12238	0.75205	0.19951	1.0376	0.81533
Cp1609	Positive	596.33	11.581	0.76572	0.12015	0.68147	0.42	0.92163	0.59778	0.95319	0.73239
Cp161	Positive	144.042	6.094	1.2013	0.52577	1.8433	0.050923	1.1676	0.85573	1.2504	0.434
Cp1610	Positive	1042.09	2.076	0.99475	0.99044	1.3751	0.059133	0.91409	0.55234	1.4709	0.54242
Cp1611	Positive	256.057	5.2	1.9366	0.07726	1.6762	0.55972	1.6835	0.86972	1.8562	0.3006
Cp1612	Positive	554.31	9.592	0.78449	0.26744	0.9249	0.54536	0.9425	0.63593	0.96536	0.90928
Cp1613	Positive	342.205	10.792	5.2441	0.025483	3.0766	0.28433	3.9939	0.10738	6.2454	0.017915
Cp1614	Positive	343.95	4.237	0.65443	0.085023	0.92706	0.51506	0.8299	0.27536	0.9448	0.74189
Cp1615	Positive	582.247	8.668	0.48335	0.25382	0.54377	0.32353	0.87196	0.64812	0.73976	0.49851
Cp1616	Positive	254.223	10.421	0.81963	0.66834	3.4104	0.6846	0.50014	0.84985	0.0089131	0.35592
Cp1617	Positive	518.235	7.107	0.78438	0.21588	1.9638	0.2924	1.412	0.71441	2.1646	0.323
Cp1618	Positive	504.15	11.25	0.67459	0.26994	0.89719	0.61207	0.62382	0.37978	0.59093	0.16227
Cp1619	Positive	484.318	8.44	1.5217	0.32288	1.6849	0.98249	1.9025	0.86674	0.81647	0.44117
Cp162	Positive	518.356	10.994	2.9005	0.018665	2.8515	0.010426	2.1133	0.31919	2.8658	0.0011818
Cp1620	Positive	322	4.943	1.0015	0.69956	1.4327	0.069466	1.3202	0.3723	1.6285	0.3514
Cp1621	Positive	731.536	10.788	1.2415	0.54696	1.5196	0.072814	1.2943	0.39245	1.251	0.51204
Cp1622	Positive	409.102	4.382	2.0926	0.019943	2.0179	0.010184	2.3467	0.091514	2.4416	0.059249
Cp1623	Positive	218.094	5.63	1.4256	0.16927	0.86231	0.94568	1.0318	0.99718	0.88246	0.96209
Cp1624	Positive	114.068	8.669	2.6642	0.6804	2.1912	0.945	1.2494	0.9744	0.1412	0.17302
Cp1625	Positive	413.224	5.611	1.1688	0.59806	1.3006	0.80651	0.9158	0.25726	1.3714	0.54714
Cp1626	Positive	514.127	9.422	0.91412	0.63433	0.90166	0.55277	0.99413	0.89459	0.89495	0.69561
Cp1627	Positive	412.133	3.464	1.5842	0.041475	1.4024	0.11928	1.6201	0.32012	1.5972	0.21293
Cp1628	Positive	438.817	11.274	2.2275	0.0020228	2.2301	0.021505	2.8888	0.0073193	1.7384	0.038749
Cp1629	Positive	685.252	8.954	0.39808	0.21953	0.7878	0.50043	0.81365	0.43925	0.84471	0.61743
Cp163	Positive	789.581	11.503	2.268	0.17219	4.2921	0.17724	4.7262	0.3296	6.7596	0.084586
Cp1630	Positive	406.266	10.183	0.29011	0.082025	0.65745	0.078455	0.51227	0.04372	0.46209	0.25314
Cp1631	Positive	216.045	5.906	0.2298	0.091516	1.2322	0.98077	1.0456	0.67006	1.1184	0.97898
Cp1632	Positive	341.991	8.63599	0.3934	0.11764	0.62182	0.30877	0.53807	0.026118	0.99415	0.80563
Cp1633	Positive	306.006	6.092	1.2202	0.42214	1.4839	0.033364	0.93188	0.39142	1.2644	0.38165
Cp1634	Positive	520.829	10.522	0.18629	0.0011547	0.87734	0.40662	1.0262	0.87799	0.40763	0.11985
Cp1635	Positive	143.076	2.815	1.2668	0.72407	0.4435	0.66401	1.1372	0.99252	0.67255	0.97088
Cp1636	Positive	720.218	9.06	0.3855	0.0035804	0.62257	0.36309	0.70534	0.19383	0.78864	0.46095
Cp1637	Positive	165.029	9.068	0.56424	0.5854	1.067	0.86777	0.98626	0.98655	0.95957	0.98824
Cp1638	Positive	504.856	11.171	1.9216	0.013806	2.4254	0.001524	2.1672	0.080211	2.2695	0.020725
Cp1639	Positive	429.223	4.001	1.0732	0.96589	1.2044	0.63964	1.0478	0.78531	0.88879	0.99283
Cp164	Positive	317.292	8.79101	0.23399	0.67839	0.22327	0.53837	0.11255	0.089583	0.5651	0.53184
Cp1640	Positive	672.197	9.467	0.45017	0.26038	0.98553	0.69172	0.96301	0.95027	0.96899	0.91293
Cp1641	Positive	342.079	4.407	0.6237	0.38033	1.2277	0.3743	1.6077	0.31149	1.1822	0.67127
Cp1642	Positive	496.842	11.172	2.0212	0.0097137	2.4448	0.00046744	2.064	0.078	2.2492	0.041517
Cp1643	Positive	401.226	4.378	298.21	0.31737	3423.3	0.33245	536.13	0.31674	435.89	0.35592
Cp1644	Positive	651.403	5.642	1.1205	0.43976	1.0228	0.58543	0.90102	0.92878	0.94221	0.96754
Cp1645	Positive	348.302	9.427	0.93087	0.54044	1.2406	0.85998	1.2379	0.21681	1.0557	0.44174
Cp1646	Positive	338.045	8.251	0.19286	0.016888	0.47256	0.11504	0.75383	0.28703	0.51425	0.27577
Cp1647	Positive	480.304	12.021	0.84516	0.4123	0.99725	0.83314	0.78237	0.44824	1.0532	0.90779
Cp1648	Positive	303.042	3.676	0.39236	0.59119	0.71986	0.8716	0.41421	0.59364	1.1273	0.89129
Cp1649	Positive	423.116	4.255	1.581	0.13255	2.9036	0.0011969	2.6076	0.085297	3.4966	0.17003
Cp165	Positive	170.021	10.567	0.93845	0.55387	1.6161	0.53708	1.2798	0.96191	0.63409	0.21977
Cp1650	Positive	540.869	11.267	1.9253	0.057417	1.9352	0.069295	1.8195	0.99908	3.123	0.043922
Cp1651	Positive	371.246	11.19	0.77897	0.23526	1.0907	0.66809	1.1471	0.68694	1.1762	0.52523
Cp1652	Positive	863.616	11.123	1.6047	0.068737	1.7725	0.023301	1.6482	0.059377	1.8864	0.1707
Cp1653	Positive	504.856	11.17	1.4796	0.18948	1.5327	0.27593	1.3121	0.3683	1.2584	0.23027
Cp1654	Positive	367.974	5.429	0.92947	0.35089	1.0272	0.68193	1.0059	0.99168	0.99396	0.91927
Cp1655	Positive	581.201	12.246	0.97	0.94442	0.78173	0.52194	0.60818	0.27249	0.60468	0.32962
Cp1656	Positive	268.134	11.012	0.14056	0.031505	0.274	0.030148	0.10103	0.021532	0.19888	0.1426
Cp1657	Positive	487.261	3.964	0.94686	0.98965	2.0756	0.22349	2.2261	0.48292	1.5731	0.40099
Cp1658	Positive	642.339	11.589	0.61279	0.015409	0.68112	0.027641	0.62781	0.017707	0.60084	0.016356
Cp1659	Positive	273.19	2.699	0.48289	0.97488	0.78765	0.8095	0.80351	0.73642	0.84486	0.46832
Cp166	Positive	496.343	11.174	2.0306	0.01275	2.3726	0.0099055	1.848	0.13738	2.4268	0.032603
Cp1660	Positive	436.302	11.653	0.81976	0.44471	1.031	0.44236	0.96498	0.53447	0.8518	0.38777
Cp1661	Positive	228.062	5.175	1.297	0.3239	1.7482	0.90919	1.4794	0.55686	1.4005	0.28456
Cp1662	Positive	393.287	6.927	0.66495	0.058767	0.98429	0.61139	1.0286	0.88083	1.0386	0.69387
Cp1663	Positive	293.093	3.341	1.0963	0.93397	1.9737	0.076087	2.1177	0.098891	1.8856	0.27968
Cp1664	Positive	424.332	10.443	1.6634	0.50873	0.88894	0.97116	0.81176	0.70549	1.3372	0.34563
Cp1665	Positive	585.136	6.094	1.0697	0.77988	1.2511	0.068608	0.89019	0.58939	1.1434	0.4606
Cp1666	Positive	206.058	6.549	9.8332	0.079388	11.093	0.0023268	10.211	0.023786	10.255	0.023833
Cp1667	Positive	146.071	8.798	1.089	0.4965	1.5899	0.23401	1.3492	0.70393	1.4794	0.54383
Cp1668	Positive	426.097	9.385	1.2798	0.26203	1.3124	0.093477	1.2934	0.15352	1.3228	0.23046
Cp1669	Positive	210.046	6.207	0.37688	0.15336	0.62918	0.35151	0.55977	0.071207	0.64816	0.32069
Cp167	Positive	226.084	10.572	0.9507	0.56956	1.6493	0.49573	1.3145	0.94925	0.64612	0.20308
Cp1670	Positive	208.145	9.784	0.93411	0.97109	1.1325	0.49476	1.2132	0.40891	0.55736	0.31834
Cp1671	Positive	297.303	13.347	0.75644	0.44952	0.76567	0.38583	0.65312	0.23269	0.91696	0.90317
Cp1672	Positive	294.101	8.58801	0.94889	0.62047	0.96751	0.69189	1.1779	0.18648	1.0679	0.71844
Cp1673	Positive	270.169	3.68	1.6654	0.056986	1.5328	0.015791	1.2302	0.70707	1.4183	0.41191
Cp1674	Positive	541.197	4.999	1.1266	0.95002	1.086	0.99015	1.3696	0.60071	0.89297	0.51389
Cp1675	Positive	319.053	6.918	0.82458	0.44999	1.029	0.84925	1.1401	0.6276	0.92917	0.91598
Cp1676	Positive	427.794	11.471	2.8113	0.0011993	2.0653	0.019728	1.6476	0.93987	2.032	0.093656
Cp1677	Positive	414.275	12.653	0.58395	0.59769	0.92542	0.88911	0.67555	0.66102	0.57244	0.85724
Cp1678	Positive	428.362	8.751	1.3422	0.14975	1.8967	0.0005011	1.4309	0.83199	2.5247	0.090558
Cp1679	Positive	605.283	11.422	0.54802	0.0023181	0.76598	0.18238	0.77012	0.19833	0.66694	0.10813
Cp168	Positive	386.279	11.187	1.188	0.323	1.3194	0.24087	1.5829	0.21747	0.84715	0.5511
Cp1680	Positive	588.236	7.769	1.3629	0.80467	1.2412	0.95536	1.1574	0.75827	0.89258	0.98833
Cp1681	Positive	162.066	4.895	1.4701	0.19931	1.176	0.18267	1.1117	0.99485	1.2971	0.42388
Cp1682	Positive	448.065	5.722	0.9166	0.69708	0.8152	0.94868	0.78527	0.69559	1.1876	0.40347
Cp1683	Positive	306.169	9.067	0.87336	0.30991	0.85352	0.93753	0.80165	0.93096	0.95896	0.98954
Cp1684	Positive	548.149	6.05	1.1839	0.58164	1.4726	0.15843	1.1979	0.69359	0.98134	0.88618
Cp1685	Positive	254.187	9.20001	1.056	0.86822	1.1174	0.95534	1.2808	0.25391	1.3362	0.24695
Cp1686	Positive	372.322	11.164	1.8482	0.1136	1.2385	0.65764	1.2415	0.58611	1.3072	0.92952
Cp1687	Positive	326.029	4.344	0.74512	0.80753	1.9209	0.2172	1.3134	0.45952	1.6513	0.17084
Cp1688	Positive	329.115	7.754	1.2688	0.24284	1.0709	0.71932	1.3999	0.10905	1.0226	0.98694
Cp1689	Positive	271.249	9.385	1.5582	0.033926	1.5963	0.0038348	1.5127	0.050287	1.4847	0.16413
Cp169	Positive	183.162	1.758	0.79943	0.32902	1.0369	0.97752	1.0842	0.93699	1.0531	0.66209
Cp1690	Positive	266.164	10.194	0.82622	0.27799	0.8888	0.49827	0.55613	0.82741	0.31222	0.51032
Cp1691	Positive	370.957	1.94	0.85654	0.77814	1.7551	0.075518	1.3463	0.69988	2.2733	0.13631
Cp1692	Positive	216.101	9.063	0.41731	0.11408	0.77031	0.16673	0.90351	0.36031	1.1101	0.49748
Cp1693	Positive	445.245	9.42899	0.83193	0.34494	0.85804	0.30058	0.83045	0.34119	0.82942	0.4276
Cp1694	Positive	101.084	11.251	0.65981	0.31069	0.82336	0.45212	0.60161	0.38382	0.41803	0.24406
Cp1695	Positive	224.086	9.672	0.25849	0.042203	0.33861	0.10501	0.32299	0.091456	0.23334	0.083613
Cp1696	Positive	248.104	5.067	3.6554	0.5837	2.568	0.67766	3.4135	0.61674	2.2046	0.77113
Cp1697	Positive	256.057	4.72	1.7347	0.49181	2.1441	0.68787	2.0739	0.46945	1.5989	0.97219
Cp1698	Positive	574.279	10.476	0.63476	0.013215	0.65879	0.0011425	0.46992	0.060474	0.68179	0.085498
Cp1699	Positive	256.13	3.891	0.7506	0.43191	1.0056	0.70426	1.265	0.43555	1.0957	0.6618
Cp17	Positive	470.339	9.038	2.3581	0.0021631	0.73452	0.34995	0.80519	0.64635	2.3404	0.089718
Cp170	Positive	342.204	11.013	0.33796	0.026812	0.42926	0.025599	0.33511	0.033512	0.28209	0.010533
Cp1700	Positive	306.003	3.559	1.0497	0.63309	1.3136	0.13973	0.87608	0.70919	0.56768	0.52902
Cp1701	Positive	438.38	9.645	1.2286	0.88464	2.1033	0.20213	1.698	0.49826	3.203	0.16381
Cp1702	Positive	164.083	11.071	1.7995	0.072863	1.8024	0.048633	1.3842	0.31148	2.304	0.080648
Cp1703	Positive	471.82	11.232	1.6759	0.010015	1.9612	0.001326	1.9167	0.091111	2.2737	0.041771
Cp1704	Positive	236.213	10.874	0.77343	0.33733	0.96767	0.8426	0.93182	0.71416	1.1209	0.64443
Cp1705	Positive	559.873	11.269	0.94474	0.64938	1.7911	0.038681	1.1247	0.85912	1.8589	0.070864
Cp1706	Positive	558.326	9.895	0.69436	0.31302	0.88379	0.60392	0.52761	0.32259	0.28018	0.17321
Cp1707	Positive	522.059	3.576	0.71936	0.20007	1.2404	0.12923	0.90747	0.67848	0.87615	0.66277
Cp1708	Positive	227.223	11.394	1.4953	0.42131	2.267	0.020392	1.6647	0.03213	2.6173	0.099326
Cp1709	Positive	554.31	10.02	1.6753	0.036609	1.0135	0.79494	0.91137	0.82854	1.0254	0.93636
Cp171	Positive	548.365	10.523	2.226	0.008094	2.4311	0.0085522	1.9638	0.13376	1.8409	0.083779
Cp1710	Positive	363.24	6.306	0.31246	0.1132	0.71221	0.20398	0.86186	0.42323	0.71079	0.082229
Cp1711	Positive	240.088	11.591	0.54683	0.30208	0.63182	0.38472	0.49195	0.019736	0.56416	0.099635
Cp1712	Positive	447.186	3.254	1.8102	0.0049856	1.7225	0.021501	1.9198	0.076675	2.0576	0.059344
Cp1713	Positive	148.124	9.392	1.175	0.30592	1.2569	0.2196	1.2809	0.29631	1.3548	0.36309
Cp1714	Positive	290.089	5.38	1.124	0.63354	1.0933	0.64314	1.1285	0.99789	1.1156	0.80983
Cp1715	Positive	493.833	11.53	1.5461	0.54574	2.0931	0.99891	1.5274	0.3646	1.3318	0.24584
Cp1716	Positive	411.371	9.355	0.475	0.046092	0.59486	0.40647	0.51069	0.061442	0.92534	0.94942
Cp1717	Positive	582.25	8.863	0.74522	0.5146	0.87186	0.67558	0.79774	0.55371	1.1966	0.7176
Cp1718	Positive	339.239	5.231	1.4772	0.10037	2.1168	0.0028652	2.2139	0.037872	2.4477	0.052694
Cp1719	Positive	315.204	3.39	0.88958	0.48129	0.85157	0.3842	0.83696	0.47193	1.0599	0.93595
Cp172	Positive	227.042	2.164	2.1003	0.08115	3.0929	0.0010269	3.1607	0.06894	3.4575	0.19341
Cp1720	Positive	215.188	7.543	0.83039	0.34968	0.99502	0.8831	0.7577	0.20724	0.78237	0.31968
Cp1721	Positive	500.062	7.082	0.9716	0.92351	1.211	0.023569	0.73536	0.90214	0.65649	0.91329
Cp1722	Positive	208.146	10.375	1.4571	0.15319	1.4946	0.10022	1.3065	0.21558	0.80494	0.48464
Cp1723	Positive	628.391	13.527	1.8951	0.10739	1.3966	0.31167	1.2399	0.62071	1.2424	0.96584
Cp1724	Positive	188.013	8.013	0.99238	0.90609	1.1879	0.6176	1.3801	0.12269	1.1723	0.50125
Cp1725	Positive	342.146	5.864	0.90417	0.51318	0.89611	0.39243	0.66085	0.27022	0.72775	0.35003
Cp1726	Positive	471.821	11.565	1.8271	0.42121	2.8611	9.48e-05	1.8656	0.76712	3.3549	0.098043
Cp1727	Positive	182.056	5.16	3.5097	0.11686	2.8623	0.05378	2.7032	0.26158	1.3629	0.58397
Cp1728	Positive	278.086	8.587	1.2812	0.3139	1.328	0.14679	1.2076	0.6496	1.0013	0.95979
Cp1729	Positive	537.859	11.462	2.2166	0.079703	2.6039	0.0022563	2.1237	0.80057	2.9471	0.19709
Cp173	Positive	288.266	11.477	0.94062	0.5054	1.278	0.75959	1.1212	0.74188	0.90749	0.47885
Cp1730	Positive	204.073	8.41199	0.72701	0.058233	0.86373	0.39961	0.76023	0.26046	0.97542	0.91299
Cp1731	Positive	702.359	11.25	0.79202	0.46258	1.0811	0.4646	0.85792	0.1661	0.97591	0.90693
Cp1732	Positive	210.104	10.182	0.30164	0.058614	0.55072	0.12593	0.18416	0.0077287	0.10181	0.012649
Cp1733	Positive	297.945	4.234	0.66697	0.34592	0.90798	0.59827	0.84661	0.39724	0.97493	0.95388
Cp1734	Positive	466.297	10.838	0.57008	0.023865	0.81707	0.29971	0.83581	0.37509	0.79452	0.24204
Cp1735	Positive	358.067	8.01401	1.1791	0.79433	1.998	0.30202	1.6763	0.22183	1.9967	0.27905
Cp1736	Positive	535.883	11.462	6.2506	0.090901	10.859	1.11e-05	9.0258	0.019517	8.9348	0.16432
Cp1737	Positive	335.282	5.954	0.89487	0.080918	1.5325	0.00025022	1.2028	0.062121	1.5121	0.17597
Cp1738	Positive	434.169	10.475	1.0951	0.83357	1.0158	0.97656	0.96531	0.68127	1.0649	0.99342
Cp1739	Positive	280.089	8.904	0.46719	0.0087033	0.70749	0.14639	0.65075	0.14091	1.2003	0.36681
Cp174	Positive	314.086	9.845	0.39552	0.11136	0.54105	0.087919	0.32941	0.037476	0.83247	0.65411
Cp1740	Positive	362.142	9.94299	1.7246	0.16384	1.6753	0.011391	1.4634	0.63053	1.7811	0.31599
Cp1741	Positive	347.067	9.06699	0.64246	0.035959	0.88718	0.38788	0.83055	0.28501	0.87504	0.26739
Cp1742	Positive	250.121	9.995	0.9292	0.37235	1.6121	0.9218	1.5525	0.5703	1.3482	0.73897
Cp1743	Positive	338.97	4.236	0.69396	0.12262	0.98411	0.69142	0.87732	0.44118	1.0333	0.86537
Cp1744	Positive	396.197	10.514	1.5284	0.14924	1.1829	0.67409	1.0386	0.9673	1.4511	0.3325
Cp1745	Positive	359.284	12.042	1.9535	0.030417	1.8512	0.1384	1.872	0.18656	0.29769	0.4956
Cp1746	Positive	238.153	8.82501	0.74423	0.45022	1.003	0.60399	1.0264	0.86528	0.90665	0.93036
Cp1747	Positive	235.056	3.576	0.90448	0.67886	1.381	0.74304	1.196	0.59844	0.91107	0.97138
Cp1748	Positive	199.157	4.063	0.53336	0.21262	0.9235	0.52599	0.81604	0.47083	1.0236	0.95085
Cp1749	Positive	270.149	11.061	0.93589	0.73338	0.81212	0.82879	0.62606	0.63409	0.81669	0.956
Cp175	Positive	471.268	6.56	0.47777	0.24854	1.6147	0.21204	0.94363	0.9182	1.5206	0.69496
Cp1750	Positive	325.371	9.876	1.6363	0.93805	0.46982	0.72277	1.0442	0.54683	0.39171	0.85513
Cp1751	Positive	509.172	4.524	1.1007	0.86283	0.95869	0.8195	1.1087	0.94508	1.0046	0.96189
Cp1752	Positive	340.056	7.296	0.42962	0.11695	0.51907	0.11438	0.62233	0.37051	0.94812	0.7771
Cp1753	Positive	355.035	3.942	1.3669	0.15984	2.149	0.0029794	1.8264	0.13393	2.1009	0.25191
Cp1754	Positive	204.151	10.525	0.9497	0.58699	0.72011	0.20314	0.51923	0.16447	0.92779	0.98132
Cp1755	Positive	309.193	10.816	n.d.	n.d.	82.86	0.69107	n.d.	n.d.	n.d.	n.d.
Cp1756	Positive	532.086	3.576	0.72025	0.22161	1.25	0.097752	0.96942	0.8478	0.92118	0.75918
Cp1757	Positive	511.388	9.586	0.76681	0.22982	0.84619	0.33671	0.69504	0.10039	0.96468	0.9121
Cp1758	Positive	223.063	8.392	1.1729	0.5296	1.3935	0.084354	0.96647	0.77813	1.0113	0.99011
Cp1759	Positive	403.148	3.687	3.9655	0.0098056	3.385	0.0025517	4.3072	0.0097616	3.8153	0.08519
Cp176	Positive	246.219	10.489	1.141	0.82976	3.0113	0.19471	2.2672	0.03975	1.5612	0.095042
Cp1760	Positive	271.085	9.435	0.67098	0.04988	0.81302	0.2803	0.85786	0.44927	0.74532	0.29914
Cp1761	Positive	227.223	11.049	0.73993	0.83439	1.0587	0.42395	1.4186	0.074714	1.1921	0.9647
Cp1762	Positive	230.152	9.741	0.2013	0.08943	0.45368	0.25246	0.4852	0.40047	0.39323	0.46597
Cp1763	Positive	208.109	7.868	0.69122	0.10907	0.97791	0.39838	1.4484	0.22974	1.5008	0.079841
Cp1764	Positive	198.16	9.119	0.8532	0.91025	1.0104	0.89561	1.216	0.23911	1.2425	0.41963
Cp1765	Positive	278.097	10.202	0.29531	0.11686	0.39481	0.078501	0.55252	0.17106	0.63749	0.31693
Cp1766	Positive	318.116	10.804	0.73624	0.41892	0.79581	0.33013	0.98251	0.79341	0.82444	0.3756
Cp1767	Positive	559.872	11.43	1.7923	0.12668	2.0937	0.01034	2.0563	0.1343	1.9771	0.26326
Cp1768	Positive	260.972	3.846	0.73691	0.40712	1.0513	0.78543	0.79517	0.33708	0.98487	0.94306
Cp1769	Positive	328.149	10.376	1.7954	0.40708	2.2707	0.024281	1.3614	0.70703	1.6663	0.52784
Cp177	Positive	439.402	9.85999	0.67488	0.63835	0.6905	0.50078	0.60096	0.41214	1.1915	0.58069
Cp1770	Positive	557.896	11.429	3.1879	0.31216	4.7395	0.037151	4.2699	0.10914	5.5585	0.06285
Cp1771	Positive	227.223	10.795	0.66095	0.64783	1.063	0.84904	0.77496	0.75766	0.97521	0.99971
Cp1772	Positive	261.084	5.973	1.3801	0.5905	1.0898	0.60352	1.142	0.98445	0.91637	0.56082
Cp1773	Positive	227.223	11.282	0.52046	0.35698	0.28702	0.11388	0.48303	0.34855	0.25492	0.17209
Cp1774	Positive	336.038	9.06799	0.66742	0.026885	0.82995	0.49437	0.82054	0.26414	0.9748	0.74321
Cp1775	Positive	280.135	10.046	1.1396	0.64052	1.0025	0.60564	0.92534	0.53384	1.208	0.53539
Cp1776	Positive	235.213	8.009	0.70351	0.30031	0.95142	0.50401	0.78458	0.33558	1.0703	0.74137
Cp1777	Positive	341.256	6.882	0.86343	0.75047	0.99193	0.40605	0.9788	0.6973	1.1566	0.39893
Cp1778	Positive	255.018	3.902	0.94301	0.56994	0.72684	0.7501	0.27721	0.56809	0.98999	0.60425
Cp1779	Positive	383.984	5.43	0.96019	0.59918	1.0357	0.55593	1.0345	0.64157	1.0077	0.99641
Cp178	Positive	426.21	4.623	0.76375	0.87059	1.7781	0.94056	1.4193	0.28742	1.1155	0.58407
Cp1780	Positive	232.107	7.295	0.96087	0.2557	0.99614	0.72885	0.65024	0.63344	0.92075	0.97833
Cp1781	Positive	296.104	9.436	0.6724	0.057629	0.86905	0.3792	0.7347	0.43862	0.8665	0.54464
Cp1782	Positive	296.076	7.754	1.0495	0.9964	1.2195	0.82043	1.4293	0.89932	1.2323	0.94446
Cp1783	Positive	239.059	8.905	0.47358	0.56367	0.6628	0.57739	0.65561	0.66056	0.34782	0.21503
Cp1784	Positive	247.215	4.091	1.7618	0.20194	2.0686	0.20617	2.1867	0.16674	1.6735	0.52565
Cp1785	Positive	184.074	10.766	0.62339	0.2973	1.0865	0.5542	0.51558	0.17302	0.25333	0.089285
Cp1786	Positive	206.094	10.954	0.17233	0.0040569	0.56954	0.13079	0.56318	0.15413	0.44959	0.12207
Cp1787	Positive	207.093	1.805	6.7109	0.55549	362.48	0.24543	2.9914	0.43359	3.7093	0.88665
Cp1788	Positive	193.09	8.579	0.63518	0.41633	0.84833	0.37729	1.0972	0.3344	0.79429	0.68481
Cp1789	Positive	609.387	4.665	n.d.	n.d.	n.d.	n.d.	n.d.	n.d.	27189	1.35e-09
Cp179	Positive	568.308	8.148	1.1265	0.43491	1.5173	0.18642	1.3337	0.51696	1.2967	0.42018
Cp1790	Positive	618.412	9.77	2.3413	0.64532	2.1263	0.56056	1.0305	0.74728	3.3462	0.45874
Cp1791	Positive	322.124	9.461	0.09824	0.024851	0.97798	0.87459	0.91153	0.98243	0.81615	0.56227
Cp1792	Positive	352.21	3.565	59.181	0.0079559	38.229	0.20274	20.981	0.75779	40.839	0.7557
Cp1793	Positive	246.136	3.512	58.121	0.50585	52827	4.69e-24	n.d.	n.d.	247.45	0.13402
Cp1794	Positive	541.281	4.665	n.d.	n.d.	n.d.	n.d.	n.d.	n.d.	15635	1.74e-10
Cp1795	Positive	418.222	9.894	0.3397	0.10197	0.60596	0.10908	0.37557	0.24397	0.072865	0.032394
Cp1796	Positive	610.445	11.062	0.53831	0.41909	0.76021	0.30486	1.8135	0.55994	2.1037	0.63978
Cp1797	Positive	336.228	9.564	336.86	0.051932	19919	0.0019601	1773.9	0.001286	1563	0.1361
Cp1798	Positive	267.215	9.398	1.5186	0.56491	1.6303	0.45603	1.5959	0.55149	1.0965	0.59521
Cp1799	Positive	308.131	10.425	0.28474	0.15534	0.59023	0.35508	0.40074	0.25754	0.76961	0.35941
Cp18	Positive	434.289	10.462	0.16879	0.0035407	0.94567	0.22381	0.66275	0.22058	2.1962	0.70672
Cp180	Positive	292.184	3.586	1.332	0.38396	1.2652	0.1818	1.0364	0.97151	1.1207	0.53924
Cp1800	Positive	412.361	11.797	1.504	0.46915	0.66518	0.042591	0.97922	0.2334	2.2187	0.076768
Cp1801	Positive	288.265	11.971	2.2808	0.84411	4.4736	0.91319	3.6383	0.93712	3.7396	0.71508
Cp1802	Positive	469.252	6.255	32.814	0.10951	12751	7.61e-09	45.838	0.31958	28.35	0.35592
Cp1803	Positive	334.071	4.623	0.64653	0.77876	1.6328	0.58612	1.4383	0.16448	1.1573	0.91605
Cp1804	Positive	482.31	11.006	0.020905	0.00010425	0.12248	0.00014447	0.081244	0.00051649	0.00012599	2.54e-08
Cp1805	Positive	286.213	9.719	2.2488	0.99653	1.2365	0.74304	1.3162	0.59087	0.68158	0.48892
Cp1806	Positive	300.276	8.257	2.4496	0.88685	14.839	0.25604	8.5457	0.34982	0.026528	0.35592
Cp1807	Positive	702.457	10.351	5.5295	0.10157	8.6267	0.0089925	4.784	0.40805	4.1407	0.1935
Cp1808	Positive	310.282	11.665	0.40271	0.082318	0.39935	0.027958	0.82808	0.22301	1.0497	0.45661
Cp1809	Positive	394.213	9.55701	9.3488	0.08428	37.702	0.030626	31.473	0.01244	21.145	0.11963
Cp181	Positive	417.163	5.144	0.47675	0.10584	1.3397	0.89843	0.77101	0.58696	0.65853	0.43675
Cp1810	Positive	483.233	6.521	n.d.	n.d.	12289	2.87e-20	593.56	0.010577	727.25	9.3e-07
Cp1811	Positive	360.223	10.569	43.752	0.21505	2182.2	0.076117	n.d.	n.d.	16.394	0.35592
Cp1812	Positive	249.204	9.395	2.1423	0.17422	2.1523	0.20538	1.7436	0.66934	1.5271	0.95567
Cp1813	Positive	163.033	5.24	0.63436	0.28696	0.62134	0.2095	0.57105	0.32687	0.62637	0.32293
Cp1814	Positive	654.492	12.327	1.7682	0.39789	1.1013	0.9931	0.87848	0.82106	1.8743	0.22019
Cp1815	Positive	171.162	8.75201	0.79577	0.93897	1.1412	0.6955	1.2563	0.19468	0.9673	0.9967
Cp1816	Positive	412.199	2.873	32.251	0.0091598	23.737	0.15816	16.201	0.18632	21.781	0.42178
Cp1817	Positive	284.233	11.192	0.00068491	7.3139e-08	0.42253	0.11567	0.37557	0.20943	0.46824	0.42618
Cp1818	Positive	294.095	6.567	1.1534	0.38271	2.0717	0.56126	1.926	0.6248	2.111	0.65131
Cp1819	Positive	374.122	4.861	0.87548	0.67961	1.7985	0.1051	1.3191	0.80382	0.89469	0.58758
Cp182	Positive	268.131	11.591	0.45623	0.04954	0.55839	0.083979	0.43383	0.052765	0.38971	0.042618
Cp1820	Positive	302.174	10.211	1.5143	0.52062	1.8642	0.14539	2.3081	0.40726	1.1055	0.95996
Cp1821	Positive	441.164	9.424	0.46259	0.13336	0.74324	0.71572	0.99145	0.74055	0.33493	0.44846
Cp1822	Positive	336.015	7.228	0.69723	0.8721	1.7163	0.86854	1.3626	0.59715	1.3346	0.63835
Cp1823	Positive	334.163	12.043	0.89727	0.81121	0.53136	0.88464	0.90376	0.98757	1.3947	0.95552
Cp1824	Positive	179.093	3.336	2.3377	0.86888	2.6384	0.77457	1.9487	0.90485	2.4664	0.47408
Cp1825	Positive	213.043	4.409	0.38751	0.12362	1.0639	0.54625	1.2504	0.60982	0.75379	0.34723
Cp1826	Positive	302.136	8.072	0.43574	0.067965	1.1838	0.55617	1.0167	0.80335	0.69981	0.27184
Cp1827	Positive	246.123	2.057	1.4816	0.67845	1.8426	0.22015	0.85053	0.95809	0.975	0.62643
Cp1828	Positive	370.166	11.591	0.14079	0.15471	0.22597	0.11663	0.25749	0.63002	0.21785	0.71334
Cp1829	Positive	514.386	12.188	8.0798	0.029217	17.73	0.083602	7.8651	0.087835	7.743	0.19177
Cp183	Positive	300.157	10.04	0.88927	0.46078	1.5526	0.69363	1.3289	0.93695	0.54266	0.25985
Cp1830	Positive	419.178	4.028	0.0018166	0.0013392	1.2419	0.94135	0.58283	0.28079	0.71602	0.57225
Cp1831	Positive	563.141	6.08	0.85024	0.37333	1.2968	0.64395	1.0586	0.94071	1.0895	0.68042
Cp1832	Positive	90.0471	4.345	0.26871	0.10628	1.0484	0.51051	0.91511	0.71228	0.94223	0.57953
Cp1833	Positive	204.003	4.246	2.8779	0.89316	4.3111	0.88591	1.6729	0.72023	2.6756	0.51232
Cp1834	Positive	585.207	7.578	1.0289	0.20829	2.6002	0.61578	2.2602	0.14443	2.0002	0.11783
Cp1835	Positive	500.287	10.29	0.82956	0.44957	1.2598	0.49939	1.4365	0.51562	0.0012686	0.026778
Cp1836	Positive	128.048	4.628	1.783	0.9988	2.1825	0.11671	1.9011	0.044101	1.1605	0.91433
Cp1837	Positive	232.978	3.396	1.9744	0.67743	4.9704	0.20632	4.0743	0.40487	9.2816	0.43184
Cp1838	Positive	376.014	5.728	0.0032417	0.16689	1.0129	0.86567	0.10502	0.50791	0.99259	0.99947
Cp1839	Positive	523.361	10.99	2.0012	0.44744	1.1141	0.92461	1.1729	0.92804	0.80003	0.58283
Cp184	Positive	472.353	10.287	1.4535	0.23661	0.42393	0.032577	0.44542	0.13628	1.2734	0.38719
Cp1840	Positive	128.011	9.651	1.9639	0.70528	2.9029	0.51707	2.7588	0.65516	0.003326	0.35592
Cp1841	Positive	251.209	6.395	17.265	0.012853	10.572	0.23487	6.6055	0.82514	8.228	0.83427
Cp1842	Positive	212.133	5.405	1.0542	0.42696	1.5647	0.71238	1.5024	0.20118	1.4868	0.26133
Cp1843	Positive	322.122	8.958	0.27135	0.056339	0.73179	0.26058	0.95751	0.69116	1.0001	0.98219
Cp1844	Positive	696.391	11.282	0.77979	0.69379	0.82277	0.61383	0.97502	0.52777	0.90653	0.60577
Cp1845	Positive	536.302	10.511	0.0014509	0.0011954	0.70705	0.31321	0.53169	0.40803	0.35816	0.21105
Cp1846	Positive	244.183	11.023	0.86316	0.73131	2.0809	0.80929	2.8854	0.34689	1.6834	0.93715
Cp1847	Positive	208.073	3.325	0.40495	0.51159	1.0732	0.97756	0.77287	0.77268	1.389	0.63535
Cp1848	Positive	491.122	3.962	0.39247	0.24556	1.7604	0.26604	1.9107	0.14894	1.5178	0.38783
Cp1849	Positive	430.372	12.342	8.6208	0.023037	6.5033	0.11222	5.6699	0.21594	10.407	0.043994
Cp185	Positive	336.014	6.094	1.1284	0.56179	1.4908	0.029768	1.0665	0.97436	1.1646	0.48819
Cp1850	Positive	238.048	4.724	1.6592	0.19393	2.0768	0.20371	2.1131	0.17622	2.8371	0.50221
Cp1851	Positive	648.301	9.039	1.8683	0.80261	0.98541	0.88317	0.71766	0.67639	2.2653	0.23704
Cp1852	Positive	164.043	5.58	0.27685	0.030113	0.5433	0.18672	0.48181	0.1494	0.5669	0.29459
Cp1853	Positive	166.05	11.444	0.67346	0.29497	0.73824	0.50903	0.8407	0.79371	0.77411	0.92944
Cp1854	Positive	558.373	10.495	4992.5	0.041057	25277	0.28114	104.25	0.50585	954.12	0.13401
Cp1855	Positive	145.111	1.779	n.d.	n.d.	n.d.	n.d.	6452.6	0.0009209	n.d.	n.d.
Cp1856	Positive	308.111	4.965	0.23261	0.10892	1.8027	0.89899	0.75434	0.58572	5.5174	0.17796
Cp1857	Positive	287.13	9.66	2.0696	0.91601	1.0109	0.40737	0.013331	0.16689	0.0123	0.35592
Cp1858	Positive	193.11	9.387	0.06468	0.32608	0.58549	0.34369	1.2868	0.56388	0.0011866	0.13414
Cp1859	Positive	148.052	9.795	0.27449	0.059523	0.87146	0.14137	0.88085	0.30772	0.14379	0.01761
Cp186	Positive	513.278	7.106	0.89621	0.6215	2.0729	0.54555	1.605	0.4169	1.651	0.37587
Cp1860	Positive	260.138	3.117	71.952	0.50585	687.83	0.47286	n.d.	n.d.	595.07	0.13398
Cp1861	Positive	423.077	10.816	256.69	0.19028	830.46	0.56786	558.62	0.18915	1629.9	0.13409
Cp1862	Positive	209.16	10.613	1.5376	0.81812	1.5087	0.64265	0.271	0.19198	0.9342	0.5923
Cp1863	Positive	584.207	7.637	1296.2	0.18886	4082.4	0.69107	n.d.	n.d.	n.d.	n.d.
Cp1864	Positive	385.182	10.015	0.91823	0.66882	0.67029	0.82856	0.6022	0.95099	0.0025066	0.35592
Cp1865	Positive	84.0215	6.56	0.11787	0.75065	1.6653	0.84687	0.0020145	0.16689	3.7403	0.19739
Cp1866	Positive	283.289	12.491	0.32216	0.39281	0.46567	0.31897	0.77898	0.72207	0.50964	0.54185
Cp1867	Positive	461.307	11.248	193.87	0.50585	11987	0.11549	302.28	0.50585	1693.8	0.13397
Cp1868	Positive	244.177	3.733	393.01	0.50585	2410.6	0.4763	485.25	0.31668	n.d.	n.d.
Cp1869	Positive	308.081	7.298	n.d.	n.d.	n.d.	n.d.	n.d.	n.d.	16067	2.26e-08
Cp187	Positive	468.323	8.79	1.9779	0.030242	0.37362	0.13745	0.28085	0.14338	2.8071	0.20602
Cp188	Positive	953.607	13.887	0.89726	0.76138	0.8359	0.62828	0.83023	0.5874	1.7259	0.28507
Cp189	Positive	486.168	9.462	0.42449	0.011949	0.94218	0.68121	0.92409	0.84219	1.0031	0.99079
Cp19	Positive	488.349	9.038	2.9927	0.0011435	0.7203	0.33043	0.78656	0.61225	3.1309	0.087528
Cp190	Positive	408.29	11.308	1.5074	0.078707	2.1907	0.075645	2.1488	0.50338	1.9824	0.18855
Cp191	Positive	225.208	10.267	0.76451	0.72219	0.66279	0.30968	0.43369	0.29101	0.57361	0.42721
Cp192	Positive	266.08	7.063	1.3716	0.70597	0.83628	0.67428	0.45521	0.38898	0.35052	0.54477
Cp193	Positive	447.285	11.25	0.72254	0.44983	0.85839	0.43867	0.6686	0.11159	0.62744	0.084263
Cp194	Positive	282.023	7.301	0.63869	0.14914	0.8244	0.32088	0.71571	0.24178	1.2204	0.8099
Cp195	Positive	816.579	11.469	1.2524	0.97484	1.9553	0.71965	1.5425	0.86416	1.0878	0.4278
Cp196	Positive	335.317	13.264	0.59511	0.24748	0.77594	0.43683	0.51543	0.13223	0.56437	0.30077
Cp197	Positive	570.379	10.496	2.1841	0.0090302	2.5606	0.0062657	1.964	0.13406	1.8458	0.059607
Cp198	Positive	759.488	9.046	13.387	0.00036951	0.76479	0.81028	0.61631	0.94745	13.833	0.16389
Cp199	Positive	306.094	6.093	1.1826	0.5852	1.8167	0.077634	1.1101	0.98793	1.1637	0.52012
Cp2	Positive	281.272	12.009	0.58448	0.26616	0.74436	0.33965	0.49142	0.13209	0.55722	0.33479
Cp20	Positive	352.261	11.071	0.79084	0.20948	0.97875	0.73852	0.93502	0.58661	1.0709	0.70735
Cp200	Positive	162.125	5.002	2.0365	0.082509	1.792	0.10758	1.6293	0.38285	1.6881	0.18957
Cp201	Positive	360.215	11.25	0.65569	0.31091	0.86879	0.5935	0.56383	0.18599	0.47134	0.12386
Cp202	Positive	499.226	5.735	1.6515	0.50299	1.7384	0.40048	1.4584	0.58382	0.80673	0.4921
Cp203	Positive	376.318	11.436	0.76468	0.1045	0.75337	0.12192	0.7039	0.15304	0.74832	0.27251
Cp204	Positive	454.346	10.522	1.076	0.52781	0.97432	0.76528	0.9604	0.73525	1.0436	0.76318
Cp205	Positive	398.245	10.587	0.15315	0.09762	0.9495	0.15933	0.10292	0.047857	0.10857	0.087922
Cp206	Positive	788.549	10.713	2.6302	0.0085999	2.3867	0.017736	2.1223	0.1451	1.7408	0.085192
Cp207	Positive	226.015	5.124	1.0392	0.92741	1.0868	0.93783	1.0048	0.9062	1.6972	0.51138
Cp208	Positive	426.349	10.448	2.4345	0.0012073	1.1107	0.61513	1.2531	0.60273	1.4398	0.23824
Cp209	Positive	462.122	11.444	1.2394	0.83709	0.93625	0.44628	0.65642	0.22165	0.96592	0.41878
Cp21	Positive	472.355	10.522	1.1047	0.50265	0.97711	0.79314	0.99926	0.91558	1.0396	0.75378
Cp210	Positive	302.137	7.064	1.1446	0.99293	1.4197	0.55936	1.5303	0.46609	1.0101	0.89061
Cp211	Positive	454.345	12.114	0.65523	0.17465	0.55367	0.032712	0.63902	0.17492	1.0271	0.61575
Cp212	Positive	254.08	6.56	0.49514	0.17911	1.5192	0.22906	0.87177	0.73988	1.2511	0.81759
Cp213	Positive	456.392	9.263	1.352	0.20763	1.9182	0.0006535	1.4898	0.25123	3.0091	0.016775
Cp214	Positive	189.048	5.002	2.0573	0.081742	1.792	0.13415	1.6105	0.35839	1.5846	0.21778
Cp215	Positive	464.37	11.402	0.87173	0.52725	0.85081	0.37839	0.76816	0.28754	0.80933	0.43798
Cp216	Positive	458.085	3.748	1.1339	0.94724	0.77154	0.94699	1.6158	0.99132	3.2926	0.28165
Cp217	Positive	596.431	12.206	1.4234	0.49845	2.0831	0.93407	2.3821	0.059303	1.6839	0.42772
Cp218	Positive	257.162	2.611	1.0315	0.98654	1.1001	0.49768	1.0595	0.95434	1.1076	0.78676
Cp219	Positive	265.973	5.726	0.60554	0.044312	0.73438	0.087491	0.74774	0.098388	0.8624	0.21537
Cp22	Positive	438.35	11.579	0.79866	0.14225	0.64454	0.048347	0.90791	0.4261	0.90806	0.53326
Cp220	Positive	627.274	7.738	10.092	0.13803	10.614	0.1123	8.5059	0.31794	6.3597	0.40505
Cp221	Positive	438.353	11.79	1.1813	0.23733	0.75455	0.26666	0.85373	0.40418	0.79385	0.37988
Cp222	Positive	482.071	3.137	0.81256	0.97625	0.50188	0.69191	0.97783	0.73373	1.108	0.92115
Cp223	Positive	243.183	7.911	2.214	0.025912	2.1478	0.13727	1.5417	0.63971	0.90246	0.84517
Cp224	Positive	567.449	10.661	0.85603	0.73621	0.81454	0.58128	0.71704	0.43674	1.2199	0.55485
Cp225	Positive	627.274	7.931	1.9643	0.22573	3.1352	0.19057	2.1984	0.3394	1.4056	0.66601
Cp226	Positive	811.536	3.299	0.30179	0.57381	0.23608	0.47933	0.58613	0.65344	0.7683	0.98893
Cp227	Positive	290.245	10.487	2.2198	0.055776	4.6337	0.57418	2.6157	0.14303	2.3304	0.051688
Cp228	Positive	269.272	12.166	0.81897	0.58646	0.93197	0.7427	0.70416	0.28323	0.67875	0.35855
Cp229	Positive	424.366	11.915	0.89069	0.6528	0.79336	0.32747	1.2732	0.82422	1.1418	0.81539
Cp23	Positive	472.355	10.448	2.0836	0.0011581	1.0599	0.71304	1.0956	0.7505	1.4777	0.25367
Cp230	Positive	264.09	5.461	232.19	0.0027407	1.975	0.4942	0.10924	0.16689	3026.2	6.05e-05
Cp231	Positive	306.168	6.092	1.3362	0.33993	1.796	0.036202	1.148	0.94779	1.2933	0.3507
Cp232	Positive	283.323	9.697	31.987	0.025349	0.94431	0.75249	0.61764	0.92195	0.0028854	0.27228
Cp233	Positive	572.15	7.05	1.3102	0.27673	0.81352	0.059117	0.36579	0.98507	0.22925	0.80127
Cp234	Positive	612.474	13.881	0.88599	0.53323	0.6395	0.25804	0.771	0.46705	1.6318	0.5135
Cp235	Positive	592.391	10.481	1.9003	0.017168	2.3368	0.014523	1.8046	0.1795	1.8675	0.058374
Cp236	Positive	452.328	10.562	1.3309	0.19478	0.86047	0.65299	0.90339	0.7387	1.0876	0.95746
Cp237	Positive	539.182	4.823	1.1063	0.94099	1.151	0.74399	1.3057	0.66398	0.80074	0.44077
Cp238	Positive	518.355	11.142	1.8997	0.023729	2.3462	0.016375	2.2696	0.16252	2.8795	0.024215
Cp239	Positive	256.239	12.65	0.7734	0.15659	0.93059	0.52558	0.8208	0.24435	1.0615	0.75605
Cp24	Positive	249.111	9.518	0.95288	0.96741	0.97309	0.85373	0.87588	0.48779	0.89673	0.56844
Cp240	Positive	450.352	11.396	1.2594	0.61875	1.0028	0.73161	0.83479	0.38603	1.1347	0.46143
Cp241	Positive	227.024	5.142	0.43135	0.091667	1.2224	0.84747	0.75333	0.61371	0.53216	0.32732
Cp242	Positive	318.044	7.299	0.65972	0.14814	0.85186	0.33918	0.72008	0.20955	1.2496	0.78478
Cp243	Positive	444.319	11.046	2.1641	0.010508	1.6964	0.033377	2.0123	0.34324	2.5115	0.025206
Cp244	Positive	286.141	7.739	4.5383	0.67206	4.7847	0.84869	4.0096	0.88054	3.461	0.2048
Cp245	Positive	124.016	1.94	0.88244	0.94496	1.6706	0.0070782	1.4729	0.36894	1.7926	0.31591
Cp246	Positive	240.067	8.641	0.45447	0.074933	0.61967	0.12196	0.50539	0.058426	1.0578	0.99264
Cp247	Positive	420.346	11.383	0.73757	0.93151	0.57343	0.34888	0.26224	0.073625	0.97092	0.60477
Cp248	Positive	590.417	12.419	2.3234	0.020091	1.3749	0.12957	1.3548	0.42799	1.5907	0.43208
Cp249	Positive	612.159	13.204	0.91573	0.64709	0.82726	0.56366	0.82964	0.44251	1.0787	0.55528
Cp25	Positive	324.178	5.002	1.8972	0.090852	1.672	0.12376	1.5062	0.42987	1.6018	0.20196
Cp250	Positive	218.168	10.288	1.4075	0.31457	0.3669	0.010168	0.39029	0.070178	1.3393	0.39349
Cp251	Positive	226.084	10.572	0.95725	0.57463	1.6706	0.47952	1.3188	0.96262	0.66661	0.25538
Cp252	Positive	418.221	9.82834	1.1823	0.8346	1.7709	0.40049	0.69897	0.25695	0.4856	0.063258
Cp253	Positive	226.014	4.234	0.71805	0.17115	0.95609	0.56563	0.87375	0.45938	1.0382	0.91579
Cp254	Positive	452.328	10.038	4.1806	0.00027432	1.9133	0.045172	2.6285	0.056641	2.5892	0.16109
Cp255	Positive	666.254	6.092	1.239	0.536	1.8659	0.056276	1.158	0.93999	1.2162	0.46602
Cp256	Positive	670.372	11.885	1.0206	0.97925	1.0493	0.76361	0.89218	0.21694	1.1524	0.22995
Cp257	Positive	312.161	9.039	1.9088	0.0036803	0.80598	0.43865	0.86739	0.74187	1.8327	0.11178
Cp258	Positive	184.036	3.601	0.49749	0.82869	0.67607	0.81024	0.76446	0.94237	2.4368	0.32791
Cp259	Positive	316.152	8.832	0.88355	0.55549	1.4197	0.78972	1.1325	0.66921	0.42978	0.14284
Cp26	Positive	592.376	10.56	1.3491	0.18521	0.83603	0.59526	0.86957	0.68374	1.1469	0.83262
Cp260	Positive	474.33	11.365	1.4339	0.27107	2.5285	0.21003	2.2936	0.29512	2.6196	0.10044
Cp261	Positive	152.119	9.388	1.4817	0.048327	1.507	0.03327	1.5627	0.030089	1.4316	0.25688
Cp262	Positive	761.55	10.744	2.5515	0.0072744	2.0898	0.033075	1.8895	0.17052	1.4645	0.28212
Cp263	Positive	301.116	3.938	1.3959	0.10008	2.2834	0.00045378	1.942	0.10541	2.3614	0.079261
Cp264	Positive	792.524	10.84	0.73954	0.16455	1.013	0.72957	0.9221	0.52917	0.98078	0.86386
Cp265	Positive	389.168	3.651	3.6647	0.00042434	2.8825	0.0090022	2.9427	0.010826	2.5146	0.053073
Cp266	Positive	582.356	10.035	4.7247	0.00032658	2.2446	0.010782	3.0562	0.03353	3.0398	0.1043
Cp267	Positive	539.182	4.912	1.2346	0.55309	1.2588	0.58996	1.4291	0.53352	1.0854	0.91975
Cp268	Positive	540.369	10.963	1.8653	0.0060798	2.2272	0.001817	1.8981	0.097374	2.0115	0.045079
Cp269	Positive	614.403	10.449	2.0721	0.012937	2.7551	0.0043284	1.9604	0.14865	1.7838	0.083245
Cp27	Positive	165.079	1.544	0.78577	0.18458	0.81908	0.18791	0.65869	0.067447	0.6807	0.12948
Cp270	Positive	170.021	10.567	0.93976	0.5525	1.6116	0.54079	1.2738	0.95896	0.63264	0.21762
Cp271	Positive	452.327	11.414	0.71853	0.10405	1.0204	0.84739	1.0711	0.94973	1.1904	0.6661
Cp272	Positive	575.293	8.096	0.94263	0.93542	1.568	0.1469	0.95576	0.96664	1.0699	0.52535
Cp273	Positive	700.498	10.771	2.4996	0.029449	1.9495	0.18207	1.9653	0.12566	1.2101	0.45769
Cp274	Positive	406.147	3.325	0.47144	0.020575	0.94854	0.53989	0.68255	0.28892	1.0832	0.82249
Cp275	Positive	1431.62	6.094	1.9238	0.29932	7.8145	0.035673	2.0189	0.50025	1.2576	0.268
Cp276	Positive	284.126	6.523	1.4924	0.26929	1.9882	0.052404	1.8533	0.095863	1.2062	0.46261
Cp277	Positive	374.053	8.415	0.47317	0.066293	0.67697	0.14194	0.5419	0.067982	1.1122	0.97554
Cp278	Positive	302.044	7.049	1.452	0.63872	0.72143	0.47746	0.33514	0.54447	0.183	0.6629
Cp279	Positive	288.265	11.35	0.81082	0.33662	0.91772	0.52783	1.2734	0.27638	1.1457	0.62256
Cp28	Positive	442.205	3.962	0.90838	0.79654	1.7151	0.12745	1.8365	0.33305	1.3119	0.82472
Cp280	Positive	306.094	5.145	0.42013	0.053744	1.255	0.97526	0.6923	0.42209	0.60215	0.36187
Cp281	Positive	290.079	3.621	2.5978	0.073064	1.426	0.71965	1.9373	0.51708	2.5187	0.094691
Cp282	Positive	162.068	8.251	0.20636	0.022195	0.44789	0.16688	0.6035	0.1896	0.45938	0.092127
Cp283	Positive	648.213	6.093	1.4894	0.82213	3.5541	0.47501	1.3558	0.64566	1.2828	0.84712
Cp284	Positive	342.149	10.586	0.19823	0.10555	0.91566	0.34389	1.6132	0.56568	0.11323	0.17281
Cp285	Positive	430.371	11.79	4.8788	0.00011778	1.994	0.28131	3.4377	0.031811	4.6431	0.036637
Cp286	Positive	133.008	5.727	0.59641	0.070619	0.74253	0.14528	0.71788	0.10838	1.0028	0.83776
Cp287	Positive	508.397	11.38	1.1369	0.31587	0.95761	0.43145	0.95557	0.51	0.68063	0.34739
Cp288	Positive	503.257	4.489	2.6886	0.051894	2.1928	0.13656	1.4879	0.41392	1.5991	0.46789
Cp289	Positive	266.126	11.226	1.0041	0.94041	1.0359	0.47056	1.0437	0.76775	1.0447	0.67274
Cp29	Positive	440.314	11.054	1.5437	0.086712	1.3077	0.074022	1.0484	0.954	1.3687	0.49295
Cp290	Positive	430.183	4.968	0.48074	0.17574	1.1659	0.61366	0.74123	0.77182	2.8337	0.11955
Cp291	Positive	632.229	7.932	1.8416	0.31873	3.0027	0.20254	2.1463	0.32592	1.3285	0.71473
Cp292	Positive	331.272	9.57101	2.6078	0.013181	6.2954	0.61349	4.8158	0.094419	4.3355	0.23292
Cp293	Positive	246.065	6.423	1.38	0.45154	1.8878	0.12726	1.4818	0.49984	1.4913	0.30525
Cp294	Positive	288.266	11.787	2.2541	0.077815	2.4422	0.049006	1.4513	0.69947	1.5673	0.35196
Cp295	Positive	201.118	6.914	0.78163	0.35727	1.0507	0.84799	1.0524	0.94338	0.96825	0.94387
Cp296	Positive	243.22	9.393	1.446	0.05359	1.4192	0.039109	1.4538	0.043242	1.3406	0.22559
Cp297	Positive	201.172	3.583	0.70055	0.076157	0.92287	0.48158	0.91158	0.49415	0.95742	0.66694
Cp298	Positive	460.829	11.399	1.342	0.26946	1.6628	0.13408	1.636	0.25874	1.6941	0.1951
Cp299	Positive	430.361	11.97	2.669	0.12929	1.7436	0.2047	1.6774	0.26767	1.791	0.26825
Cp3	Positive	485.247	6.094	1.2375	0.46767	1.7928	0.062514	1.1303	0.96797	1.2321	0.43827
Cp30	Positive	162.125	5.908	0.54647	0.069455	1.1755	0.93893	0.99674	0.89271	1.2187	0.65304
Cp300	Positive	222.057	9.844	0.39578	0.19874	0.58525	0.10409	0.36769	0.034311	0.79999	0.54084
Cp301	Positive	237.19	11.397	0.99929	0.78882	1.2459	0.22366	1.2695	0.39917	1.0067	0.68731
Cp302	Positive	618.085	5.01	0.58309	0.708	0.64068	0.48752	1.0132	0.75678	5.1376	0.66224
Cp303	Positive	438.249	7.116	0.25253	0.10559	0.86842	0.23932	0.42204	0.1887	1.7139	0.70642
Cp304	Positive	370.094	12.246	0.89053	0.78274	0.80908	0.49438	0.68213	0.34548	0.93295	0.94527
Cp305	Positive	134.094	2.837	1.3489	0.24824	1.6738	0.014922	1.5102	0.1758	1.6295	0.2825
Cp306	Positive	250.03	3.546	0.84909	0.97207	1.0168	0.61373	0.53227	0.35996	0.49337	0.44197
Cp307	Positive	190.172	9.384	1.4335	0.060443	1.4284	0.049932	1.4625	0.05718	1.3622	0.28844
Cp308	Positive	596.449	11.476	1.9381	0.094196	1.9063	0.10659	1.8912	0.16098	1.4194	0.37419
Cp309	Positive	308.111	4.345	0.6743	0.19642	1.3808	0.80024	0.94947	0.70347	1.0979	0.81207
Cp31	Positive	484.34	11.037	1.6868	0.0481	1.4113	0.026745	1.1136	0.85239	1.4729	0.36628
Cp310	Positive	166.026	8.358	0.67398	0.48499	0.88185	0.98636	0.66345	0.48696	1.5835	0.58132
Cp311	Positive	334.163	7.812	1.3515	0.49739	2.2112	0.88213	1.387	0.56843	0.12006	0.054506
Cp312	Positive	420.345	11.421	0.88705	0.99043	0.93685	0.58303	1.0807	0.22553	1.1712	0.37357
Cp313	Positive	958.422	6.094	1.3002	0.38716	1.9231	0.030226	1.1275	0.65209	1.2929	0.41183
Cp314	Positive	467.433	10.35	0.97472	0.56911	0.86768	0.79977	0.76409	0.80826	1.4862	0.42503
Cp315	Positive	299.191	4.17	1.9415	0.31087	1.539	0.12598	1.4661	0.48715	1.0977	0.47384
Cp316	Positive	745.555	11.371	1.8862	0.036187	1.8717	0.014137	1.9514	0.27025	1.4452	0.23047
Cp317	Positive	656.47	10.798	2.5823	0.030348	2.0484	0.011659	1.6758	0.47931	1.0915	0.72413
Cp318	Positive	567.42	13.437	0.75032	0.77843	0.78797	0.78798	0.89929	0.95604	1.9737	0.20171
Cp319	Positive	478.306	12.206	1.5345	0.5209	2.4992	0.22527	2.7384	0.040475	1.783	0.41147
Cp32	Positive	396.287	11.063	1.0793	0.9301	1.1039	0.69174	1.0315	0.87382	1.2119	0.56257
Cp320	Positive	189.012	6.093	1.1284	0.57583	1.4275	0.045884	1.0311	0.96253	1.1387	0.51044
Cp321	Positive	452.818	11.086	1.689	0.48786	1.8305	0.096	2.082	0.10524	1.4463	0.41169
Cp322	Positive	473.337	11.373	2.6762	8.7845e-05	2.3914	1.76e-05	2.3408	0.022975	2.3438	0.056165
Cp323	Positive	766.064	3.29	0.3499	0.62258	0.25984	0.44699	0.64613	0.66111	0.89177	0.95767
Cp324	Positive	287.246	9.548	1.9696	0.0033392	1.9707	0.031828	1.9874	0.037808	2.0146	0.50052
Cp325	Positive	1432.12	6.092	1.6426	0.4156	6.5586	0.15301	1.6268	0.95087	1.0738	0.48124
Cp326	Positive	438.21	6.658	1.2984	0.50949	1.5745	0.46863	1.8661	0.48092	1.9747	0.26302
Cp327	Positive	156.005	11.59	0.4489	0.050782	0.53985	0.071506	0.4414	0.056911	0.3954	0.043945
Cp328	Positive	612.239	8.074	1.4258	0.42588	1.6112	0.28431	1.0117	0.90193	0.64262	0.87526
Cp329	Positive	365.973	5.43	0.93565	0.36056	1.0287	0.58314	1.0017	0.98988	0.97047	0.73283
Cp33	Positive	408.29	11.152	2.1568	0.031461	2.2663	0.023047	1.9827	0.256	1.4584	0.21495
Cp330	Positive	360.179	10.293	1.0714	0.49562	1.4649	0.99904	1.4498	0.53091	0.30784	0.13428
Cp331	Positive	414.205	9.702	1.2483	0.72854	1.3994	0.44896	1.2161	0.97035	2.0059	0.13742
Cp332	Positive	318.282	11.315	2.4881	0.075409	2.3296	0.76373	1.6085	0.93915	1.7853	0.97554
Cp333	Positive	208.182	9.549	1.6075	0.014302	1.7905	0.34311	1.9408	0.03488	1.8818	0.32667
Cp334	Positive	306.168	7.067	0.48932	0.15903	1.1687	0.45151	0.58025	0.30582	1.398	0.31859
Cp335	Positive	362.303	11.441	3.0914	0.81359	1.2319	0.1065	0.44713	0.1171	2.1607	0.72488
Cp336	Positive	596.268	7.537	4.4972	0.015746	1.6915	0.30858	1.3499	0.24307	0.22371	0.83404
Cp337	Positive	228.208	11.666	0.78191	0.26542	1.0431	0.93609	0.92107	0.50897	1.2541	0.35667
Cp338	Positive	190.171	9.561	5.2074	0.10793	9.2031	0.0032941	11.908	0.00044176	4.7108	0.48655
Cp339	Positive	636.417	10.424	1.9776	0.011434	2.6496	0.008695	1.8666	0.17772	1.5935	0.11419
Cp34	Positive	279.147	3.846	4.1188	2.1388e-05	2.4252	0.00044568	3.6522	0.016094	2.5695	0.086202
Cp340	Positive	710.349	12.957	1.1058	0.64149	2.0321	0.0018806	1.6975	0.23128	2.0341	0.067641
Cp341	Positive	469.252	6.621	0.73136	0.7874	1.7977	0.94283	0.79491	0.5034	2.2531	0.7507
Cp342	Positive	318.154	11.422	0.50422	0.0010656	0.72939	0.15911	0.76794	0.28703	0.79485	0.3238
Cp343	Positive	187.119	4.673	2.6596	0.16516	2.4248	0.18098	1.4724	0.51483	0.92915	0.78467
Cp344	Positive	298.249	10.37	1.6126	0.71786	1.0325	0.81484	0.91645	0.49742	0.51679	0.48142
Cp345	Positive	470.337	10.438	0.90888	0.66712	0.69585	0.42959	0.55162	0.26944	0.70486	0.3568
Cp346	Positive	540.369	11.109	2.096	0.0015883	2.4729	0.00034874	2.155	0.044155	2.4036	0.015807
Cp347	Positive	104.062	2.074	1.1136	0.4636	1.6148	0.0039786	1.0279	0.79151	1.5156	0.35503
Cp348	Positive	332.292	11.957	1.6855	0.76525	0.74649	0.46525	0.47581	0.95077	0.97541	0.52396
Cp349	Positive	259.055	7.063	1.0064	0.76634	1.2965	0.62122	1.4283	0.45798	1.1091	0.77346
Cp35	Positive	528.366	11.012	1.555	0.0589	1.3506	0.037636	1.1017	0.89469	1.3376	0.40819
Cp350	Positive	388.104	10.693	0.81177	0.36777	0.79521	0.38138	0.53608	0.11509	0.96301	0.64057
Cp351	Positive	332.083	7.92899	1.5182	0.46589	2.4022	0.2341	1.7493	0.60498	1.1787	0.89528
Cp352	Positive	283.288	13.257	0.88347	0.40108	1.0374	0.90236	0.97854	0.79476	1.1355	0.46607
Cp353	Positive	412.359	11.7934	3.7147	0.00010958	3.4345	1.14e-06	2.8945	0.066943	3.614	0.0505
Cp354	Positive	488.223	7.448	0.7085	0.42089	1.584	0.038396	1.171	0.24578	1.889	0.19098
Cp355	Positive	483.267	7.452	0.53287	0.68422	1.4529	0.09217	1.6161	0.041266	1.691	0.3822
Cp356	Positive	358.184	12.098	0.5499	0.055202	0.74668	0.18121	0.57139	0.067318	1.0055	0.90804
Cp357	Positive	356.042	8.733	0.43818	0.076603	0.62307	0.11668	0.43914	0.043209	1.1335	0.97764
Cp358	Positive	430.2	10.321	4881.1	0.0024932	n.d.	n.d.	n.d.	n.d.	n.d.	n.d.
Cp359	Positive	301.188	1.611	1.3023	0.2277	1.2532	0.154	1.1451	0.87866	1.3717	0.44668
Cp36	Positive	227.188	8.508	3.1231	0.011231	3.1326	0.81161	2.7392	0.59406	0.67262	0.33993
Cp360	Positive	217.095	4.44	1.4486	0.13063	1.3502	0.14082	1.1748	0.746	1.1533	0.66156
Cp361	Positive	286.142	7.931	2.4394	0.18173	3.697	0.15179	2.7135	0.39174	2.0173	0.28007
Cp362	Positive	152.119	9.39001	1.4665	0.057961	1.4836	0.037039	1.481	0.063767	1.3616	0.3116
Cp363	Positive	429.221	4.33	0.73432	0.73583	1.298	0.4113	1.3113	0.67879	1.1	0.60733
Cp364	Positive	438.21	6.504	1.5388	0.77105	4.8168	0.39404	2.2506	0.48066	4.4185	0.14183
Cp365	Positive	514.331	10.245	0.51697	0.72016	0.91123	0.98623	0.5455	0.38437	0.3184	0.64534
Cp366	Positive	382.184	3.886	0.5886	0.093896	0.73511	0.41517	0.52786	0.32089	0.57098	0.18348
Cp367	Positive	162.053	6.557	0.35792	0.20809	1.7835	0.036598	0.99846	0.88884	1.7204	0.44947
Cp368	Positive	562.379	10.93	2.1003	0.079539	2.2373	0.014378	1.8216	0.25685	2.1619	0.085884
Cp369	Positive	606.416	13.366	1.4539	0.013971	1.1285	0.65855	1.0996	0.85854	1.8111	0.075295
Cp37	Positive	454.344	10.448	1.7967	0.0025086	1.0214	0.90813	1.0062	0.9439	1.3625	0.30204
Cp370	Positive	503	3.1	1.4194	0.71885	0.9818	0.82634	1.5277	0.99005	1.9573	0.53322
Cp371	Positive	498.338	11.641	0.44721	0.80585	0.32164	0.99887	0.38419	0.91376	0.33208	0.39154
Cp372	Positive	206.024	8.643	0.42374	0.22464	0.6108	0.081818	0.51126	0.031497	0.91007	0.68362
Cp373	Positive	162.125	6.085	0.89107	0.69026	1.3482	0.22031	1.113	0.75095	1.2036	0.33789
Cp374	Positive	439.169	2.04	0.86049	0.62021	1.3835	0.11795	1.4305	0.66542	1.0921	0.84199
Cp375	Positive	518.233	7.107	0.57849	0.1057	1.8009	0.37825	1.2957	0.6792	2.0335	0.14051
Cp376	Positive	227.042	1.937	0.91446	0.95684	1.6308	0.010764	1.4719	0.34909	1.843	0.27187
Cp377	Positive	578.385	12.374	1.4068	0.051147	1.3622	0.029084	1.2678	0.15047	1.3144	0.17233
Cp378	Positive	164.046	4.848	0.59742	0.13047	0.87447	0.54056	0.86552	0.38949	0.65902	0.19334
Cp379	Positive	621.254	6.772	1.7633	0.031633	2.0404	0.093895	2.6162	0.020464	1.6983	0.37848
Cp38	Positive	328.152	11.25	0.65277	0.3109	0.87478	0.588	0.55828	0.18527	0.43967	0.09719
Cp380	Positive	458.273	9.649	0.84109	0.19337	1.2892	0.5627	1.0858	0.34802	0.20811	0.0812
Cp381	Positive	488.349	9.313	0.40739	0.017147	0.48706	0.05343	0.34164	0.052104	0.58215	0.18993
Cp382	Positive	530.268	11.886	0.96711	0.69639	1.0157	0.97326	0.85664	0.18753	1.0879	0.4473
Cp383	Positive	396.036	6.093	1.1155	0.57681	1.508	0.023741	1.0769	0.87172	1.1742	0.455
Cp384	Positive	313.083	8.06799	1.4609	0.20258	1.6413	0.12559	1.1776	0.28527	0.73524	0.46502
Cp385	Positive	406.147	4.541	4.0001	0.068385	2.192	0.58658	1.4199	0.62398	0.91541	0.98033
Cp386	Positive	790.582	11.339	2.463	0.011039	2.5433	0.0024882	2.5321	0.039055	2.1062	0.081121
Cp387	Positive	430.301	11.6	1.5958	0.36597	1.4432	0.93898	0.86478	0.27537	1.1916	0.51936
Cp388	Positive	294.217	10.525	2.4199	0.11415	0.91548	0.21231	0.70419	0.19827	1.0396	0.19737
Cp389	Positive	84.0216	6.093	1.3873	0.17694	2.0341	0.097201	1.1842	0.96821	1.3677	0.34139
Cp39	Positive	204.072	5.238	0.78968	0.18275	0.78798	0.29525	0.6963	0.16132	0.74311	0.17099
Cp390	Positive	483.267	7.352	0.49373	0.018654	1.1775	0.90993	1.266	0.94097	1.4383	0.42271
Cp391	Positive	351.157	4.761	1.065	0.33427	1.809	0.030527	1.6668	0.44227	1.2734	0.41833
Cp392	Positive	481.216	7.063	1.1762	0.86757	1.5173	0.37063	1.5604	0.43883	1.0455	0.98778
Cp393	Positive	320.033	5.727	0.4705	0.047479	0.75746	0.18638	0.71378	0.1886	0.95981	0.65219
Cp394	Positive	538.141	12.246	0.94582	0.79769	0.81545	0.45095	0.65429	0.29891	0.96924	0.90988
Cp395	Positive	658.43	10.399	1.833	0.055076	2.4678	0.014557	1.7001	0.28842	1.4257	0.21108
Cp396	Positive	187.12	1.361	0.79357	0.26565	1.0127	0.7386	1.0187	0.88636	1.1604	0.32508
Cp397	Positive	495.682	6.092	1.2131	0.60525	1.7667	0.08327	1.0896	0.84038	1.1614	0.5532
Cp398	Positive	632.23	7.739	10.077	0.14201	9.8879	0.41309	8.1231	0.3533	7.0089	0.38178
Cp399	Positive	603.247	7.519	1.4387	0.23555	2.1845	0.051082	2.5839	0.018403	2.1824	0.30394
Cp4	Positive	342.204	11.591	0.43975	0.043538	0.54266	0.069137	0.41629	0.039461	0.37812	0.035729
Cp40	Positive	208.182	9.394	1.4429	0.058029	1.4362	0.053132	1.479	0.048074	1.3653	0.30118
Cp400	Positive	423.124	6.092	1.2521	0.46869	1.8891	0.047873	1.1484	0.46361	1.2056	0.44824
Cp401	Positive	162.053	3.96	1.1078	0.86262	2.0177	0.016672	1.9769	0.18796	1.8465	0.13929
Cp402	Positive	312.227	9.827	1.1478	0.96994	0.025225	0.0024912	0.14211	0.16264	0.68118	0.57277
Cp403	Positive	484.318	9.67999	0.62666	0.11432	0.87098	0.49369	0.91929	0.73246	0.69723	0.23718
Cp404	Positive	486.333	9.453	1.5493	0.15392	0.93906	0.889	0.95551	0.86462	1.0479	0.92713
Cp405	Positive	555.434	11.34	0.92481	0.83301	0.79254	0.39884	0.81736	0.62509	0.61268	0.29302
Cp406	Positive	275.083	7.059	1.3556	0.73901	1.1612	0.54249	0.66854	0.62012	0.61649	0.46991
Cp407	Positive	241.24	11.213	0.96866	0.84309	0.88133	0.65287	0.61852	0.21826	0.63912	0.39289
Cp408	Positive	464.179	11.642	875.21	0.012151	n.d.	n.d.	n.d.	n.d.	n.d.	n.d.
Cp409	Positive	296.235	10.245	2.3649	0.23898	1.2185	0.61598	1.69	0.58288	1.3563	0.44593
Cp41	Positive	572.392	10.982	1.4053	0.15262	1.2884	0.068796	1.0864	0.92074	1.3202	0.38513
Cp410	Positive	259.055	6.523	1.3915	0.31742	1.685	0.10229	1.803	0.12978	1.4847	0.37683
Cp411	Positive	500.325	10.765	0.54054	0.30628	1.0227	0.59545	0.44601	0.15005	0.26412	0.099407
Cp412	Positive	614.381	7.721	4.3326	0.00050768	1.5613	0.098494	2.0486	0.11701	2.3956	0.12185
Cp413	Positive	570.881	10.497	2.1339	0.010182	2.5409	0.0061999	1.9701	0.14066	1.8483	0.070861
Cp414	Positive	745.554	11.704	2.8575	0.78412	2.5862	0.005057	1.4598	0.9614	1.6058	0.35823
Cp415	Positive	271.178	3.897	2.1235	0.057043	1.673	0.32114	1.1679	0.83471	2.1848	0.80377
Cp416	Positive	315.204	3.258	1.0766	0.73041	1.1703	0.31016	1.0247	0.85383	1.3794	0.50043
Cp417	Positive	482.311	11.593	0.59125	0.037202	0.68695	0.070531	0.55298	0.02655	0.59168	0.044971
Cp418	Positive	526.855	10.551	2.2364	0.012606	2.4589	0.0073276	1.9848	0.14896	1.8948	0.076738
Cp419	Positive	272.234	10.874	0.73268	0.1836	0.97573	0.61719	0.95934	0.58958	1.0479	0.96322
Cp42	Positive	430.303	11.118	1.7005	0.072268	2.1267	0.052178	1.772	0.10334	2.1856	0.033136
Cp420	Positive	199.12	3.502	0.76428	0.75153	1.3022	0.029376	1.0755	0.71475	1.3919	0.30192
Cp421	Positive	770.097	5.416	0.55515	0.89603	0.7546	0.90362	1.3932	0.79825	5.183	0.42955
Cp422	Positive	189.012	3.55	0.85766	0.96381	1.0384	0.67665	0.58053	0.39565	0.52682	0.41359
Cp423	Positive	631.299	11.248	0.45979	0.36643	0.82244	0.35443	0.23162	0.18569	0.1051	0.074106
Cp424	Positive	260.08	7.457	0.53832	0.11342	0.94445	0.78542	1.0235	0.75447	1.0227	0.62849
Cp425	Positive	222.09	8.359	0.63894	0.2777	0.87216	0.73726	0.58113	0.2436	1.5219	0.69011
Cp426	Positive	464.16	10.51	4031.3	1.3813e-06	n.d.	n.d.	n.d.	n.d.	n.d.	n.d.
Cp427	Positive	266.163	10.186	0.39135	0.19605	0.54451	0.26706	0.4154	0.21262	0.68076	0.17082
Cp428	Positive	156.003	10.551	0.7488	0.077198	1.6485	0.43289	1.136	0.16319	0.25957	0.1039
Cp429	Positive	302.006	2.057	0.7491	0.84034	0.48848	0.82968	0.89427	0.70954	1.1502	0.59661
Cp43	Positive	300.157	10.582	0.9594	0.56723	1.6737	0.49724	1.2913	0.97782	0.65035	0.25443
Cp430	Positive	548.868	10.523	2.2022	0.0088125	2.5537	0.0055259	2.0371	0.10795	1.9116	0.058839
Cp431	Positive	469.252	6.118	0.90961	0.45655	10.745	1.25e-08	6.1774	0.0006821	3.3893	0.0039453
Cp432	Positive	226.12	11.07	0.80359	0.26385	1.0298	0.94251	0.93792	0.60684	1.1019	0.56836
Cp433	Positive	128.12	6.201	0.67842	0.44686	1.0107	0.76661	0.82629	0.79712	0.88863	0.85539
Cp434	Positive	460.83	11.235	1.6705	0.1193	1.6362	0.0092142	1.9888	0.2154	1.906	0.11668
Cp435	Positive	540.869	10.96	1.9195	0.038726	2.3197	0.011445	2.2388	0.091183	1.9996	0.32639
Cp436	Positive	306.074	2.091	1.2019	0.96359	0.66063	0.40143	1.1564	0.95182	1.3543	0.35147
Cp437	Positive	592.894	10.474	2.0333	0.018001	2.5936	0.0070471	1.9472	0.13799	1.7757	0.085346
Cp438	Positive	284.163	10.791	0.98654	0.77724	1.1293	0.50321	1.0355	0.92024	1.1752	0.39068
Cp439	Positive	466.294	11.198	0.58526	0.083342	0.84493	0.45826	1.0088	0.91683	1.2088	0.51134
Cp44	Positive	280.152	4.405	0.7596	0.47467	1.3657	0.24592	1.6832	0.38559	1.2697	0.60746
Cp440	Positive	352.253	9.795	4.0848	0.020012	0.84894	0.29421	0.48984	0.078472	2.6093	0.040435
Cp441	Positive	600.364	12.197	2.2517	0.074276	1.7045	0.11259	1.6179	0.47302	1.2502	0.47866
Cp442	Positive	208.002	2.767	1.5536	0.083449	1.5261	0.10256	1.7702	0.17758	1.5997	0.32746
Cp443	Positive	474.83	11.053	2.5114	0.019829	2.4958	0.041747	2.2221	0.2628	2.2977	0.011464
Cp444	Positive	317.158	11.42	0.22787	0.14023	0.31049	0.18184	0.26739	0.13463	0.48589	0.33574
Cp445	Positive	310.163	3.519	2.5731	0.12503	3.0229	0.65343	3.3607	0.1321	1.462	0.45476
Cp446	Positive	376.319	11.436	0.76586	0.23412	0.72392	0.11789	0.66949	0.15885	0.70426	0.28026
Cp447	Positive	418.998	3.146	0.72554	0.73182	0.47389	0.5041	0.82303	0.70938	1.1635	0.91658
Cp448	Positive	302.137	6.95901	0.83635	0.37375	1.3545	0.77516	1.1123	0.95289	0.66878	0.16683
Cp449	Positive	496.345	11.331	1.4737	0.19579	1.865	0.043247	2.2023	0.058043	1.9967	0.1726
Cp45	Positive	456.365	11.802	1.0394	0.97813	0.85081	0.37705	0.86862	0.49929	0.98564	0.97634
Cp450	Positive	315.077	3.719	1.6922	0.16207	1.9842	0.012749	2.6277	0.1036	2.1398	0.053217
Cp451	Positive	376.318	11.436	0.75704	0.066937	0.73803	0.089749	0.69119	0.11945	0.74528	0.2471
Cp452	Positive	287.245	9.553	1.7983	0.0040183	1.8064	0.037789	1.8264	0.034118	1.8132	0.43754
Cp453	Positive	514.314	9.798	3.8123	0.012765	0.76311	0.29835	0.60228	0.18818	2.5631	0.068803
Cp454	Positive	152.011	10.593	0.95044	0.61148	1.6479	0.45863	1.3039	0.98703	0.63666	0.26854
Cp455	Positive	351.061	6.092	1.065	0.71926	1.4279	0.072809	1.0482	0.93577	1.0974	0.57723
Cp456	Positive	272.089	11.25	0.65047	0.29788	0.8672	0.57081	0.56758	0.16901	0.46007	0.097939
Cp457	Positive	584.395	10.901	2.8788	0.017327	3.5039	0.00029912	3.0256	0.0069272	2.3708	0.19409
Cp458	Positive	146.994	8.63901	0.4295	0.035395	0.59339	0.071093	0.50537	0.015376	0.85115	0.49983
Cp459	Positive	452.817	11.236	1.8696	0.042877	1.8495	0.01271	2.0206	0.20231	2.3423	0.038165
Cp46	Positive	255.256	11.829	0.94937	0.9833	1.0452	0.99322	0.73882	0.32108	0.73251	0.42739
Cp460	Positive	464.189	6.633	1.5047	0.35345	1.9649	0.33326	1.3863	0.48932	1.0436	0.70161
Cp461	Positive	374.052	8.626	0.35371	0.17982	0.59806	0.29987	0.43245	0.033885	1.0059	0.8587
Cp462	Positive	496.844	11.024	1.7019	0.15976	2.0653	0.068065	1.6845	0.10606	2.121	0.048262
Cp463	Positive	226.193	9.628	0.85111	0.52812	1.0197	0.8755	1.0706	0.89601	1.0161	0.82105
Cp464	Positive	251.079	4.946	1.6652	0.047762	1.8115	0.0033356	1.6516	0.24091	1.9268	0.11846
Cp465	Positive	457.211	5.558	6.0634	1.8251e-05	2.7448	0.0023897	4.3721	0.0055775	2.863	0.073476
Cp466	Positive	408.793	11.151	2.4925	0.00030159	2.2454	0.027921	1.8542	0.14014	1.3109	0.28835
Cp467	Positive	632.392	7.721	4.3297	0.00025815	1.5709	0.10952	2.0662	0.086049	2.4011	0.10361
Cp468	Positive	439.355	11.792	1.2999	0.10276	0.85645	0.36485	0.85056	0.39938	0.77612	0.35496
Cp469	Positive	504.84	10.576	2.3443	0.0083919	2.4513	0.0067317	2.0874	0.11417	1.8742	0.096445
Cp47	Positive	430.303	11.274	2.0169	0.050049	2.7439	0.0027263	2.5835	0.19192	2.8242	0.13945
Cp470	Positive	454.344	11.159	1.3472	0.21437	1.0528	0.87936	1.4644	0.57949	0.83383	0.71512
Cp471	Positive	275.993	6.094	1.1054	0.61895	1.492	0.032576	1.066	0.94331	1.1458	0.52546
Cp472	Positive	414.204	9.59	0.90128	0.44326	0.97745	0.68123	0.92461	0.52413	0.98422	0.80938
Cp473	Positive	443.132	4.349	0.80952	0.87229	2.1159	0.98993	1.078	0.87438	1.2833	0.5292
Cp474	Positive	379.137	12.022	0.98221	0.93271	1.001	0.91653	1.0471	0.8341	1.3759	0.21491
Cp475	Positive	614.906	10.448	2.1892	0.0085838	2.831	0.0033214	2.0467	0.11744	1.9168	0.060921
Cp476	Positive	308.111	3.886	0.66705	0.12727	0.85041	0.48591	0.6631	0.18946	0.71034	0.28324
Cp477	Positive	314.115	9.788	0.31594	0.11295	0.98115	0.34133	1.1129	0.49849	0.3503	0.18734
Cp478	Positive	680.444	10.377	2.1549	0.093391	3.0137	0.0025632	2.0882	0.12478	1.5055	0.31036
Cp479	Positive	768.08	4.83	0.42332	0.81249	0.49376	0.44437	1.1783	0.76018	2.5293	0.76188
Cp48	Positive	360.215	10.768	0.6362	0.25272	1.0866	0.86918	0.55462	0.14968	0.42452	0.031256
Cp480	Positive	313.062	4.245	1.7484	0.13818	2.1661	0.39774	1.3682	0.97414	1.3782	0.93374
Cp481	Positive	126.104	6.092	1.234	0.50583	1.5237	0.12626	1.0177	0.54857	1.2006	0.4386
Cp482	Positive	150.068	8.007	0.70196	0.10096	0.95078	0.57811	0.97671	0.68204	0.98423	0.956
Cp483	Positive	307.126	1.501	3.5609	0.0017575	1.2882	0.83644	1.5053	0.72277	1.2582	0.4662
Cp484	Positive	448.285	11.262	1.0349	0.94721	0.98896	0.8386	0.8255	0.42736	0.68021	0.11939
Cp485	Positive	393.344	11.429	0.74651	0.15174	0.75859	0.17006	0.67717	0.16025	0.72006	0.30342
Cp486	Positive	278.223	11.5	1.4729	0.40408	1.1455	0.91425	0.90241	0.57978	1.3206	0.58136
Cp487	Positive	518.857	10.992	1.808	0.0085961	2.0232	0.045588	1.6645	0.063644	1.6074	0.052945
Cp488	Positive	562.38	11.078	1.5442	0.054247	2.0899	0.0050711	1.7524	0.20214	1.9276	0.2041
Cp489	Positive	477.183	4.529	2.6638	0.47795	1.7166	0.81728	1.7887	0.32356	0.24536	0.42107
Cp49	Positive	728.528	11.371	1.6917	0.044352	1.8197	0.0323	2.1739	0.10345	1.575	0.19629
Cp490	Positive	156.003	7.065	2.0021	0.10436	2.3445	0.77267	2.0728	0.80409	1.3991	0.51317
Cp491	Positive	535.823	9.038	3.2371	0.002821	0.67888	0.48533	0.76575	0.57797	3.006	0.083926
Cp492	Positive	514.326	10.726	0.73505	0.56009	1.0653	0.96226	1.4649	0.52719	1.942	0.82049
Cp493	Positive	468.324	10.761	0.4291	0.016429	0.5728	0.052987	0.44667	0.022909	0.52632	0.15497
Cp494	Positive	352.209	3.324	4.9607	0.0016269	4.2173	0.079018	2.4345	0.83551	4.3325	0.1264
Cp495	Positive	499.162	4.781	0.47346	0.00042999	0.46629	0.010054	0.5446	0.043713	0.66468	0.12076
Cp496	Positive	430.183	7.883	1.8254	0.22248	2.8695	0.067808	2.0062	0.085012	1.6854	0.148
Cp497	Positive	303.292	9.13599	3.3538	0.023874	3.4525	0.00038452	1.4796	0.15038	2.2353	0.19363
Cp498	Positive	252.208	9.544	1.7448	0.006835	1.78	0.059984	1.7803	0.066061	1.7303	0.61407
Cp499	Positive	243.184	12.344	2.1886	0.26323	1.9327	0.34095	1.2518	0.78479	2.9983	0.89682
Cp5	Positive	414.204	9.424	0.86678	0.44334	0.90656	0.51635	0.94978	0.66474	0.88146	0.5763
Cp50	Positive	648.404	11.184	2.1659	0.0016202	1.2991	0.62198	1.5617	0.31692	1.2367	0.40173
Cp500	Positive	166.026	3.845	0.84834	0.4742	0.96402	0.87295	0.85019	0.57625	1.0046	0.97549
Cp501	Positive	244.176	4.088	2.0256	0.2077	1.5895	0.6586	1.1089	0.73976	0.68735	0.25746
Cp502	Positive	246.065	6.658	1.4568	0.22317	1.4776	0.3214	1.8322	0.36757	1.501	0.7965
Cp503	Positive	183.162	3.055	0.63521	0.039685	0.89464	0.41524	0.89559	0.47259	0.91638	0.50212
Cp504	Positive	736.493	10.447	3.6843	0.044708	1.2123	0.5329	1.1638	0.6072	2.3516	0.25768
Cp505	Positive	320.148	6.653	1.0626	0.83721	1.4568	0.57768	1.0052	0.76264	0.68336	0.23481
Cp506	Positive	345.216	10.579	0.8095	0.44322	1.1905	0.79402	0.96943	0.76458	0.72788	0.43438
Cp507	Positive	272.233	10.012	1.5616	0.99448	1.0735	0.80285	1.0891	0.99626	1.0117	0.79128
Cp508	Positive	307.112	4.351	0.60089	0.39844	1.3103	0.68064	1.2678	0.89061	1.103	0.45747
Cp509	Positive	357.269	11.419	0.51029	0.023794	0.74688	0.19191	1.0466	0.89271	0.67952	0.18351
Cp51	Positive	616.418	10.955	1.2588	0.37327	1.261	0.11916	1.0811	0.92993	1.2691	0.413
Cp510	Positive	429.236	5.413	0.85192	0.30104	0.93939	0.52033	0.92059	0.51345	0.98352	0.85583
Cp511	Positive	358.199	8.218	1.5097	0.89409	1.5173	0.61392	1.3538	0.77505	0.65243	0.2879
Cp512	Positive	207.076	5.727	0.59647	0.078871	0.77188	0.19393	0.73049	0.13	1.0252	0.98568
Cp513	Positive	418.163	5.192	1.5866	0.035333	1.0975	0.9159	1.158	0.866	0.94711	0.83543
Cp514	Positive	452.329	9.326	0.28033	0.037172	0.44432	0.073884	0.31663	0.066394	0.48064	0.22318
Cp515	Positive	401.349	9.535	12.725	0.28267	5.9526	0.045835	3.5454	0.13252	4.143	0.1108
Cp516	Positive	513.278	7.226	0.88633	0.36912	3.5501	0.94757	3.0112	0.024023	2.7722	0.69807
Cp517	Positive	220.02	4.943	1.1176	0.39415	1.4977	0.048547	1.3595	0.33496	1.7652	0.21992
Cp518	Positive	318.132	5.179	1.3187	0.55686	1.3499	0.56535	1.4936	0.42474	1.1621	0.89213
Cp519	Positive	853.574	10.809	0.8157	0.34709	0.97815	0.65761	0.91291	0.59379	1.0625	0.77401
Cp52	Positive	356.329	12.505	1.4021	0.33671	1.6118	0.087976	0.76216	0.36928	0.98264	0.78931
Cp520	Positive	421.1	4.436	1.4693	0.066954	1.331	0.71997	1.814	0.5393	1.618	0.53798
Cp521	Positive	772.559	11.504	3.4112	0.11638	6.1761	0.076475	5.63	0.039173	5.5297	0.1918
Cp522	Positive	372.106	4.657	0.85389	0.45739	1.0587	0.93181	0.93287	0.62351	1.0899	0.88024
Cp523	Positive	278.009	4.405	0.69071	0.30188	1.2913	0.32435	1.5492	0.37382	1.1299	0.84128
Cp524	Positive	332.146	6.846	1.9362	0.51662	1.5488	0.57991	1.3005	0.92798	0.64072	0.55898
Cp525	Positive	234.062	9.426	0.82167	0.31318	0.89494	0.44489	0.91037	0.54886	0.81538	0.33065
Cp526	Positive	324.029	4.344	0.66669	0.16234	1.2438	0.65366	0.84984	0.47273	0.94328	0.6032
Cp527	Positive	368.11	4.944	1.2426	0.24869	1.663	0.028241	1.4857	0.29105	2.0864	0.1667
Cp528	Positive	560.243	8.217	1.375	0.90227	1.5375	0.74297	1.5853	0.67866	0.52907	0.26017
Cp529	Positive	268.241	10.71	0.78678	0.28395	1.0031	0.98242	0.97851	0.77366	0.96804	0.97958
Cp53	Positive	452.317	11.086	1.4923	0.1657	2.0362	0.046944	1.6893	0.068579	1.3965	0.21783
Cp530	Positive	146.058	4.345	0.65446	0.18171	1.5309	0.74213	0.99579	0.56783	1.127	0.85676
Cp531	Positive	350.23	8.672	1.5343	0.58764	2.885	0.25637	2.468	0.42858	2.6528	0.25809
Cp532	Positive	302.137	6.091	1.6338	0.48723	1.6176	0.96615	1.4107	0.6005	0.82795	0.42808
Cp533	Positive	1086.71	10.538	1.1372	0.24991	0.81231	0.47461	0.82033	0.5035	1.036	0.82116
Cp534	Positive	172.1	4.359	0.66391	0.06849	0.95026	0.57227	0.82664	0.47797	0.95371	0.70394
Cp535	Positive	148.109	3.527	2.2288	0.66246	3.2798	0.22778	3.2572	0.89687	1.7303	0.5459
Cp536	Positive	453.288	9.98901	1.3131	0.29694	1.1564	0.66814	1.1605	0.65585	1.4198	0.16562
Cp537	Positive	468.124	3.554	0.86454	0.96172	1.0063	0.66746	0.66299	0.47201	0.62798	0.50201
Cp538	Positive	430.061	9.436	0.32954	0.17442	0.54285	0.26472	0.36975	0.030778	1.041	0.98399
Cp539	Positive	302.136	7.245	1.131	0.96654	1.4324	0.64609	1.154	0.8822	0.97915	0.67328
Cp54	Positive	640.476	11.29	1.8939	0.45416	1.1288	0.37934	1.8861	0.66535	0.58051	0.31047
Cp540	Positive	590.36	10.323	0.44489	0.46994	0.12411	0.46545	0.12401	0.70236	0.36135	0.62947
Cp541	Positive	387.261	11.591	0.56819	0.033621	0.63103	0.032767	0.56048	0.032925	0.5667	0.04049
Cp542	Positive	362.084	2.767	1.6847	0.078457	1.6133	0.11257	1.9515	0.12477	1.7913	0.34363
Cp543	Positive	482.828	10.603	2.2043	0.013815	2.3194	0.010885	1.95	0.18124	1.7192	0.14266
Cp544	Positive	430.293	12.459	1.1781	0.63066	1.3173	0.22728	1.3659	0.36194	0.93531	0.89662
Cp545	Positive	645.283	7.272	3.9708	0.41812	4.7501	0.45969	2.6811	0.46618	1.5163	0.93984
Cp546	Positive	464.172	3.553	0.8876	0.97197	1.0731	0.61871	0.55555	0.37922	0.50126	0.39633
Cp547	Positive	194.112	1.94	0.68165	0.091033	0.94235	0.71357	0.80611	0.34376	0.68984	0.13287
Cp548	Positive	602.255	8.668	1.7851	0.77111	1.2639	0.74201	0.98012	0.82139	0.39976	0.065878
Cp549	Positive	260.233	10.982	0.30426	0.055425	0.81066	0.33198	1.0927	0.56033	0.53468	0.19879
Cp55	Positive	234.111	9.062	0.63099	0.055789	0.88639	0.37961	0.86367	0.38532	1.0245	0.95301
Cp550	Positive	302.03	7.298	0.62903	0.11937	0.82583	0.28966	0.6959	0.16438	1.1787	0.91482
Cp551	Positive	294.132	3.709	1.99	0.070444	3.3438	0.32709	1.7279	0.7985	2.3361	0.21917
Cp552	Positive	366.154	9.505	19.278	0.00014629	8.0702	0.02054	7.1987	0.021904	10.534	0.14935
Cp553	Positive	434.318	9.038	2.3345	0.0027844	0.78119	0.47438	0.8444	0.78981	2.2693	0.098672
Cp554	Positive	401.205	3.585	1.21	0.50228	1.1832	0.30058	1.017	0.78904	1.1857	0.54066
Cp555	Positive	238.121	8.16699	0.19644	0.0017081	0.43401	0.024821	0.42445	0.082478	0.49226	0.047672
Cp556	Positive	537.184	5.179	1.5657	0.44002	1.5326	0.36479	1.3767	0.53877	1.1383	0.93238
Cp557	Positive	126.031	5.145	0.6131	0.4729	1.5098	0.48955	1.0066	0.86892	0.64883	0.61032
Cp558	Positive	636.918	10.423	2.0154	0.023229	2.7354	0.0040832	1.9119	0.16416	1.7594	0.095824
Cp559	Positive	936.085	3.638	0.75463	0.79981	0.55424	0.88617	0.78819	0.81366	0.74001	0.60068
Cp56	Positive	288.157	6.093	1.2694	0.44981	1.8385	0.05737	1.1549	0.95501	1.265	0.41353
Cp560	Positive	132.006	5.727	0.45809	0.25053	0.71802	0.43432	0.73013	0.1215	0.94176	0.62271
Cp561	Positive	360.087	6.625	1.0418	0.73962	1.762	0.4631	1.2255	0.66012	2.0149	0.66123
Cp562	Positive	169.048	9.519	0.95752	0.93404	0.97438	0.90765	0.88284	0.53012	0.86497	0.57786
Cp563	Positive	488.349	9.58801	3.1196	0.023591	1.6651	0.22897	1.6108	0.65382	0.8937	0.87905
Cp564	Positive	156.005	11.249	0.63311	0.31116	0.84941	0.59814	0.55115	0.19261	0.44574	0.11416
Cp565	Positive	114.032	6.093	1.2742	0.5215	1.9284	0.05395	1.2169	0.84454	1.2123	0.47576
Cp566	Positive	557.396	10.963	1.9337	0.18105	3.2316	4.41e-05	2.8725	0.011646	2.382	0.039142
Cp567	Positive	650.239	7.277	4.0496	0.11059	4.906	0.59911	2.7903	0.48117	1.6608	0.93564
Cp568	Positive	664.398	10.29	0.2802	0.039278	0.4271	0.088955	0.3143	0.059375	0.50409	0.24351
Cp569	Positive	717.524	10.77	2.6049	0.0029512	1.774	0.30117	1.6538	0.40507	1.064	0.68221
Cp57	Positive	596.298	10.658	11.168	0.0034458	2.819	0.68582	2.182	0.77345	7.8333	0.50049
Cp570	Positive	346.307	12.518	2.0931	0.49427	1.1388	0.58204	0.72605	0.839	0.00082338	0.1349
Cp571	Positive	114.105	8.01501	0.79197	0.55736	1.0045	0.91736	1.1345	0.72032	1.1009	0.5844
Cp572	Positive	459.262	9.428	0.81837	0.26693	0.86778	0.26119	0.86741	0.42369	0.89602	0.57002
Cp573	Positive	227.024	5.135	0.789	0.30029	1.1093	0.90307	0.88972	0.53161	1.1103	0.81327
Cp574	Positive	188.119	7.795	0.81834	0.2506	0.99686	0.77821	0.99748	0.79122	0.97227	0.8171
Cp575	Positive	907.105	5.523	1.4891	0.68566	1.6562	0.63078	3.1891	0.65922	5.5226	0.416
Cp576	Positive	126.031	1.605	1.3444	0.19394	1.3248	0.29213	1.357	0.43466	1.982	0.063079
Cp577	Positive	190.171	9.556	2.0637	0.0074214	2.2543	0.0054452	2.2259	0.016749	2.0813	0.25636
Cp578	Positive	195.144	10.098	1.9439	0.029974	1.9189	0.0050331	1.6279	0.42626	1.37	0.16447
Cp579	Positive	448.194	7.925	1.9748	0.21033	3.2294	0.70866	2.126	0.48905	1.598	0.19972
Cp58	Positive	684.501	11.405	1.9935	0.026646	2.0112	0.043764	1.9564	0.22514	1.6079	0.16779
Cp580	Positive	493.833	11.057	1.6872	0.13536	1.9037	0.14873	1.9471	0.21812	1.7238	0.11517
Cp581	Positive	423.156	5.531	0.88017	0.66005	1.6379	0.16689	1.3067	0.88632	1.0145	0.98487
Cp582	Positive	370.219	4.292	0.66972	0.28995	0.82606	0.64345	0.70352	0.39534	0.71256	0.5287
Cp583	Positive	219.111	1.971	1.4253	0.13356	1.752	0.0057826	1.6467	0.22741	2.0593	0.10548
Cp584	Positive	517.317	9.28	4.274	0.0009472	1.6813	0.93832	1.3929	0.7314	4.38	0.011689
Cp585	Positive	515.846	11.02	1.5165	0.10596	1.8138	0.1297	1.9288	0.21883	2.0141	0.060821
Cp586	Positive	454.341	11.579	0.9494	0.75436	0.82444	0.41299	1.0267	0.98709	1.1937	0.84532
Cp587	Positive	414.245	4.583	0.72594	0.48932	0.88904	0.89372	0.73831	0.49358	0.75797	0.62899
Cp588	Positive	415.205	3.005	1.2036	0.91009	1.1067	0.97765	1.3323	0.76629	0.91396	0.6522
Cp589	Positive	318.132	5.688	1.404	0.5165	1.5441	0.43498	1.5891	0.28588	1.2398	0.73539
Cp59	Positive	262.229	11.359	0.4938	0.16742	0.64898	0.22199	0.47852	0.12318	0.61352	0.40251
Cp590	Positive	246.071	9.561	0.87837	0.72807	1.0289	0.83584	1.1025	0.79478	0.96355	0.84198
Cp591	Positive	487.193	6.099	1.0408	0.18449	2.4227	0.0020436	1.5635	0.53412	0.88149	0.40036
Cp592	Positive	288.263	11.632	8.2442	0.22796	13.188	0.039842	11.035	0.094726	3.803	0.51406
Cp593	Positive	832.514	11.596	1.4941	0.64914	1.8109	0.42884	1.3393	0.23753	0.90601	0.59806
Cp594	Positive	294.141	9.044	1.658	0.0033415	1.0999	0.54363	1.2954	0.11902	1.6087	0.098631
Cp595	Positive	325.263	11.086	0.75888	0.15166	0.9412	0.56479	0.93531	0.56509	1.0686	0.68297
Cp596	Positive	262.07	6.091	1.2035	0.44461	1.4944	0.028513	1.1193	0.88655	1.2181	0.40495
Cp597	Positive	422.155	6.953	1.7251	0.18343	2.5771	0.062764	1.8792	0.56026	1.6714	0.24329
Cp598	Positive	454.239	6.554	0.47103	0.6588	1.6053	0.089479	0.90257	0.77689	1.6055	0.59257
Cp599	Positive	259.055	6.632	1.2536	0.55862	1.6394	0.2307	1.4307	0.31138	1.2501	0.52131
Cp6	Positive	187.063	2.81	0.98075	0.70834	0.90481	0.44917	0.87394	0.43912	0.70639	0.12808
Cp60	Positive	542.332	11.251	0.76758	0.20772	0.9297	0.62133	0.74696	0.14364	0.74715	0.16781
Cp600	Positive	336.015	3.572	0.77216	0.29554	1.2272	0.16721	0.89828	0.61419	0.84978	0.5507
Cp601	Positive	914.515	10.578	1.0731	0.83419	1.2601	0.82673	1.1212	0.83863	0.76804	0.48768
Cp602	Positive	331.272	9.573	4.0714	0.011352	11.692	0.020595	9.0149	0.0062009	7.7121	0.046875
Cp603	Positive	308.111	6.617	1.0199	0.55055	1.7982	0.69689	0.85035	0.63118	2.0609	0.64738
Cp604	Positive	377.11	5.563	0.9106	0.65157	1.9174	0.0023372	1.7016	0.20096	2.4242	0.088187
Cp605	Positive	469.152	4.767	0.5253	0.011833	0.71276	0.11258	0.61524	0.018813	0.98797	0.76049
Cp606	Positive	243.219	9.393	1.4993	0.041769	1.4521	0.032027	1.482	0.0453	1.4127	0.17935
Cp607	Positive	194.006	5.727	0.45055	0.040098	0.6592	0.1172	0.62246	0.13137	0.85679	0.45366
Cp608	Positive	403.148	4.944	1.2466	0.24317	1.6069	0.047545	1.4275	0.30271	2.0689	0.1579
Cp609	Positive	184.073	11.249	0.63425	0.27505	0.88105	0.60535	0.58763	0.20793	0.47827	0.12516
Cp61	Positive	261.07	6.093	1.1227	0.57458	1.4381	0.056025	1.0513	0.9742	1.1627	0.49026
Cp610	Positive	258.146	11.249	0.68636	0.34538	0.87396	0.61956	0.57543	0.18839	0.46538	0.097511
Cp611	Positive	585.151	4.402	0.71901	0.77124	2.2655	0.030395	3.0293	0.38054	3.2823	0.12184
Cp612	Positive	498.349	11.162	0.40034	0.48988	0.63252	0.57624	0.32975	0.2388	0.35177	0.49644
Cp613	Positive	199.084	1.328	1.1691	0.51611	1.1291	0.9279	1.4608	0.41486	1.4697	0.41559
Cp614	Positive	300.033	6.702	0.60583	0.078805	0.84424	0.30561	0.8067	0.25281	1.0281	0.9441
Cp615	Positive	554.31	9.705	1.3452	0.24066	1.2819	0.12292	1.1017	0.92426	1.4571	0.19363
Cp616	Positive	243.184	12.508	1.1501	0.68823	1.246	0.65232	0.90417	0.16367	1.3307	0.85158
Cp617	Positive	537.86	10.989	2.1927	0.00093653	2.7386	0.00058762	2.3795	0.051854	2.5814	0.0064364
Cp618	Positive	415.221	4.495	1.619	0.23375	1.3407	0.12972	1.0947	0.96839	1.1891	0.76834
Cp619	Positive	296.075	10.693	0.81325	0.26917	0.80396	0.2471	0.46425	0.13045	0.8405	0.39802
Cp62	Positive	729.29	6.091	1.3962	0.44585	2.4314	0.046129	1.3207	0.93767	1.2537	0.4421
Cp620	Positive	426.349	10.522	1.0441	0.74674	0.93011	0.62763	0.93126	0.66946	0.97332	0.94098
Cp621	Positive	504.855	11.021	2.3944	0.019222	2.2335	0.0015889	1.9661	0.13864	1.8018	0.12465
Cp622	Positive	294.216	10.433	1.6838	0.22463	1.1036	0.99123	1.5189	0.92549	1.0219	0.80073
Cp623	Positive	311.154	8.789	2.1538	0.063351	0.34388	0.31565	0.28298	0.71878	2.9131	0.22369
Cp624	Positive	562.882	10.931	2.3947	0.0012186	2.9442	0.00012656	2.4552	0.049336	2.6559	0.015863
Cp625	Positive	144.044	3.554	2.1354	0.18106	1.8518	0.41635	2.1061	0.19267	2.8539	0.15306
Cp626	Positive	264.243	12.01	0.6349	0.28519	0.75519	0.35818	0.54666	0.1551	0.6514	0.41279
Cp627	Positive	488.223	7.355	0.54237	0.45976	0.94321	0.68768	1.0407	0.9685	1.1788	0.56167
Cp628	Positive	176.12	7.44601	0.69722	0.092984	0.90165	0.41865	0.90128	0.47635	0.9314	0.52851
Cp629	Positive	466.075	4.183	1.2541	0.73961	0.61848	0.90198	1.2203	0.79991	3.9511	0.44912
Cp63	Positive	237.063	3.973	0.94757	0.85018	1.7014	0.049332	1.3956	0.64616	1.5926	0.28353
Cp630	Positive	658.933	10.399	1.9443	0.041688	2.8406	0.0056295	1.8983	0.2146	1.617	0.16411
Cp631	Positive	580.249	8.099	0.9642	0.8995	1.476	0.16001	0.90769	0.79736	1.12	0.47576
Cp632	Positive	447.153	5.092	7.7937	0.00021309	2.7313	0.0055097	5.589	0.017862	3.6689	0.049578
Cp633	Positive	816.582	11.638	1.7084	0.077498	1.3903	0.65962	1.2546	0.99577	1.4857	0.18987
Cp634	Positive	518.856	11.142	1.5565	0.083021	2.0507	0.0061909	1.7217	0.12328	1.7198	0.51924
Cp635	Positive	484.352	12.374	0.27624	0.45865	0.41281	0.41258	0.23169	0.15187	0.1369	0.64147
Cp636	Positive	557.178	6.037	1.6078	0.38436	1.7992	0.91783	0.82735	0.21362	0.29318	0.036253
Cp637	Positive	589.236	6.981	2.6906	0.085828	2.841	0.030566	1.9918	0.8451	1.91	0.066355
Cp638	Positive	463.205	4.245	1.3971	0.3053	2.1864	0.00064849	1.8244	0.23116	2.9359	0.057586
Cp639	Positive	499.231	6.091	3.7992	0.68086	3.3736	0.69833	3.451	0.39651	0.00092052	0.024029
Cp64	Positive	728.528	11.216	1.5282	0.23716	1.3937	0.56131	1.2739	0.93086	0.82701	0.43691
Cp640	Positive	162.067	3.384	1.7343	0.0077373	1.47	0.94173	2.1338	0.062686	1.8123	0.032748
Cp641	Positive	98.1098	6.092	1.1432	0.59787	1.4931	0.043139	0.97883	0.54324	1.1433	0.55531
Cp642	Positive	471.821	11.091	1.6037	0.30345	2.2057	0.0077822	1.9598	0.55722	1.406	0.72437
Cp643	Positive	326.193	3.961	0.55109	0.15742	0.72881	0.45637	0.62285	0.31592	0.59358	0.39671
Cp644	Positive	578.415	13.224	1.6666	0.48274	2.3021	0.97414	1.5703	0.54733	0.84783	0.59567
Cp645	Positive	656.469	9.157	3.0269	0.00086475	2.5568	0.0044616	2.5922	0.13489	2.0069	0.089239
Cp646	Positive	496.844	11.172	1.7074	0.065657	2.1015	0.011176	1.7441	0.1783	2.0769	0.1415
Cp647	Positive	830.595	10.71	3.1564	5.7405e-05	2.3405	0.00013029	3.0376	0.047641	2.6423	0.040019
Cp648	Positive	330.216	11.086	0.83844	0.22359	0.90991	0.4174	0.83174	0.22842	0.96685	0.68668
Cp649	Positive	567.871	10.524	2.0527	0.0062199	2.4042	0.0072395	1.9185	0.16903	1.7168	0.12106
Cp65	Positive	784.075	2.056	0.85248	0.98514	0.48949	0.69252	1.054	0.74283	1.268	0.89416
Cp650	Positive	311.115	8.148	1.0142	0.59058	1.3996	0.012325	1.3748	0.18687	1.4023	0.31847
Cp651	Positive	242.175	2.5	1.8693	0.20841	1.5974	0.97452	1.2286	0.62868	1.3019	0.66636
Cp652	Positive	528.351	12.026	0.51368	0.47952	0.61875	0.091649	0.69353	0.40448	0.52142	0.62687
Cp653	Positive	504.177	8.957	0.34565	0.0014993	0.7648	0.27564	0.78744	0.35101	0.88121	0.64824
Cp654	Positive	265.095	4.769	0.99177	0.85379	1.7057	0.0081985	1.3979	0.56514	2.1823	0.081638
Cp655	Positive	230.161	3.037	1.8116	0.95686	1.1077	0.66197	0.49903	0.39297	0.62193	0.55396
Cp656	Positive	156.042	4.064	1.9533	0.10274	1.1108	0.89709	1.4974	0.45287	0.89168	0.68378
Cp657	Positive	418.222	10.084	4.594	0.1076	3.4314	0.092167	5.5312	0.0010547	2.4736	0.22983
Cp658	Positive	459.123	3.576	0.61402	0.38232	1.531	0.079631	0.97268	0.60588	0.86886	0.81254
Cp659	Positive	342.292	8.471	0.27014	0.012917	0.36508	0.016444	0.29159	0.035183	0.19816	0.034537
Cp66	Positive	684.501	11.251	2.3193	0.021109	2.2085	0.01629	1.8659	0.26389	1.5621	0.22356
Cp660	Positive	458.27	4.838	0.69893	0.58542	0.85235	0.88499	0.70278	0.57419	0.76495	0.71894
Cp661	Positive	377.113	4.028	1.2115	0.4145	2.2694	0.069978	1.7249	0.31149	1.5804	0.52112
Cp662	Positive	287.246	9.544	1.382	0.79662	1.8222	0.75173	1.2524	0.53021	2.4814	0.31194
Cp663	Positive	721.301	6.099	0.86781	0.7892	4.3107	0.00054391	2.0314	0.72726	1.7644	0.23385
Cp664	Positive	594.449	11.584	1.3706	0.2019	1.0109	0.86535	0.86491	0.65646	0.93696	0.91775
Cp665	Positive	631.799	11.248	0.48642	0.32791	0.92013	0.42447	0.25287	0.19466	0.1565	0.16628
Cp666	Positive	955.406	6.095	1.5374	0.42847	4.4163	0.015114	1.5567	0.84742	1.5921	0.4921
Cp667	Positive	230.079	7.066	1.5668	0.12377	1.9188	0.22507	1.7968	0.27201	1.2606	0.77279
Cp668	Positive	1103.63	11.422	0.099783	0.020157	0.46146	0.20231	0.42873	0.19367	0.43979	0.24612
Cp669	Positive	518.355	11.298	1.9653	0.03139	2.2562	0.026813	2.1053	0.34873	3.0964	0.043963
Cp67	Positive	789.58	11.338	1.6592	0.050169	1.8854	0.013758	2.2909	0.19258	1.9456	0.12845
Cp670	Positive	553.216	7.083	1.1568	0.99203	1.4135	0.43365	0.89811	0.69189	0.78871	0.7446
Cp671	Positive	148.088	5.498	0.70354	0.081344	0.92291	0.49059	0.93073	0.5573	0.9683	0.78646
Cp672	Positive	405.163	3.636	0.9853	0.97949	1.3003	0.58296	1.5424	0.37043	1.7497	0.77194
Cp673	Positive	470.339	8.897	3.2045	0.015452	0.46096	0.93703	0.48925	0.66485	6.9774	0.10073
Cp674	Positive	545.858	10.552	2.0441	0.019401	2.3708	0.0082559	1.9027	0.16201	1.7439	0.1033
Cp675	Positive	300.267	11.717	0.49277	0.23591	0.61173	0.33347	0.54976	0.30651	0.49431	0.39233
Cp676	Positive	523.844	10.578	2.3465	0.010755	2.5442	0.0075567	2.1091	0.11734	1.979	0.051966
Cp677	Positive	629.47	9.16	2.621	0.0024405	2.1445	0.032885	2.1115	0.27306	1.815	0.174
Cp678	Positive	584.395	11.047	1.6804	0.016406	2.6536	0.00088558	1.6559	0.10118	2.0753	0.01432
Cp679	Positive	589.884	10.496	2.0531	0.017346	2.5058	0.0077745	1.8826	0.13529	1.8171	0.06932
Cp68	Positive	208.182	9.394	1.4441	0.065482	1.4397	0.061097	1.4798	0.046058	1.36	0.3159
Cp680	Positive	252.208	9.55399	1.8383	0.0057158	1.8774	0.060862	1.8818	0.063025	1.9107	0.60183
Cp681	Positive	210.088	4.947	1.1181	0.44421	1.3662	0.13587	1.2296	0.70413	1.7369	0.28114
Cp682	Positive	551.164	5.095	3.2577	0.11587	1.7739	0.81361	1.0747	0.75635	0.68809	0.42984
Cp683	Positive	579.252	7.643	3.4127	0.027355	3.0204	0.66733	2.0257	0.42274	1.341	0.56188
Cp684	Positive	298.251	10.491	1.9559	0.49341	1.2343	0.97095	1.2493	0.9494	1.1881	0.60395
Cp685	Positive	298.142	9.42499	1.0627	0.76578	0.94224	0.65058	0.82238	0.47037	0.95784	0.91261
Cp686	Positive	464.119	11.444	0.86104	0.56289	0.69062	0.47049	0.41761	0.13429	0.72322	0.9892
Cp687	Positive	288.084	1.592	1.369	0.1689	1.3438	0.24856	1.4367	0.40138	1.4651	0.2417
Cp688	Positive	441.255	7.099	2.7069	0.46396	3.9657	0.59811	4.8967	0.75945	3.9621	0.80595
Cp689	Positive	142.082	6.915	0.73481	0.27857	0.89449	0.42349	0.99565	0.80119	0.91503	0.90982
Cp69	Positive	251.079	4.396	0.87847	0.85449	1.7726	0.006823	1.4868	0.4317	2.8531	0.074473
Cp690	Positive	430.804	11.118	1.9452	0.14418	2.449	0.023284	2.3966	0.040817	2.4451	0.069363
Cp691	Positive	460.829	11.567	2.247	0.088673	2.3883	0.0035113	2.0848	0.13057	2.3292	0.27461
Cp692	Positive	376.211	8.039	1.2894	0.97293	1.1654	0.57878	1.7629	0.065582	0.88117	0.79529
Cp693	Positive	342.148	10.589	0.23316	0.049541	0.89307	0.31697	1.5713	0.61864	0.10903	0.02821
Cp694	Positive	552.403	13.31	n.d.	n.d.	2024	0.69107	n.d.	n.d.	n.d.	n.d.
Cp695	Positive	717.523	9.15301	2.9361	0.012905	2.8304	0.00096113	3.4639	0.0031634	2.4021	0.070474
Cp696	Positive	486.168	8.267	0.59423	0.17526	0.96093	0.81063	1.1879	0.61043	1.0301	0.95418
Cp697	Positive	454.205	9.067	0.61075	0.039349	0.88182	0.36639	0.8394	0.33225	0.94241	0.61292
Cp698	Positive	200.177	10.82	0.61233	0.20721	0.75389	0.3838	0.74085	0.43479	0.70781	0.50718
Cp699	Positive	122.037	3.978	0.83245	0.61239	1.5742	0.097346	1.1868	0.93767	1.524	0.27232
Cp7	Positive	148.037	5.727	0.55895	0.053858	0.74966	0.15761	0.72153	0.12864	0.94215	0.61949
Cp70	Positive	452.316	11.235	1.9722	0.04627	2.052	0.017168	1.7443	0.14369	1.7639	0.2334
Cp700	Positive	1072.61	11.259	1.0507	0.76344	1.0861	0.87956	1.0503	0.84782	0.8548	0.36312
Cp701	Positive	403.344	8.927	1.941	0.80991	1.1695	0.41348	1.0575	0.93553	2.0603	0.042985
Cp702	Positive	152.118	9.549	3.5051	0.013829	3.837	0.049519	3.8287	0.12871	3.6936	0.43472
Cp703	Positive	611.897	10.474	2.0054	0.010165	2.6196	0.0063657	1.9024	0.17114	1.8298	0.059682
Cp704	Positive	312.089	7.756	0.87608	0.42707	1.0863	0.82083	1.002	0.86995	1.153	0.51661
Cp705	Positive	670.483	11.241	2.6165	0.042722	2.4486	0.00066044	2.086	0.052056	0.84242	0.65992
Cp706	Positive	368.074	4.721	1.9766	0.036035	2.19	0.023263	1.9114	0.14238	1.9359	0.35626
Cp707	Positive	555.291	8.20899	1.2142	0.98307	1.1077	0.92262	1.0702	0.61243	0.50483	0.092132
Cp708	Positive	732.482	10.566	1.1926	0.21488	0.89584	0.64824	0.90223	0.71486	1.1194	0.78599
Cp709	Positive	593.48	10.28	0.46444	0.02865	0.74811	0.22681	0.7184	0.26153	1.0981	0.93395
Cp71	Positive	208.182	9.393	1.4418	0.062414	1.418	0.07722	1.4142	0.093476	1.3694	0.30259
Cp710	Positive	196.073	4.657	0.9506	0.71223	1.1655	0.7041	1.0231	0.74851	1.2238	0.57401
Cp711	Positive	363.225	9.651	0.9717	0.45714	1.3008	0.64276	1.1784	0.6468	0.353	0.023811
Cp712	Positive	502.175	6.091	1.4508	0.23926	1.7765	0.047681	1.3026	0.6985	1.1167	0.65367
Cp713	Positive	501.831	10.604	2.5754	0.0053761	2.7176	0.0039617	2.3081	0.034933	2.0231	0.082114
Cp714	Positive	398.084	3.936	4.1688	0.00018245	3.0322	0.0065599	3.2932	0.027343	2.1049	0.22929
Cp715	Positive	248.09	5.13	1.2248	0.95153	2.0246	0.26185	1.0354	0.75463	1.1058	0.42242
Cp716	Positive	282.166	3.568	0.57583	0.088028	0.67928	0.1268	0.56389	0.1329	0.54684	0.19742
Cp717	Positive	559.872	10.963	1.7597	0.080557	1.8828	0.14017	1.5656	0.46696	2.119	0.055369
Cp718	Positive	543.194	6.054	1.5975	0.38533	1.8107	0.15659	1.2886	0.84297	1.1618	0.89371
Cp719	Positive	180.078	8.16	0.114	0.010101	0.32544	0.10368	0.38362	0.15915	0.42253	0.24635
Cp72	Positive	660.444	10.925	1.1197	0.69292	1.1889	0.32001	1.0491	0.99452	1.1791	0.50574
Cp720	Positive	216.099	9.65	1.2287	0.70492	1.6984	0.77672	1.3606	0.38015	0.36248	0.079614
Cp721	Positive	531.38	12.097	2.3431	0.012291	2.0529	0.00025365	2.4623	0.043927	2.5499	0.0509
Cp722	Positive	460.815	10.629	2.2724	0.015852	2.2618	0.017202	1.9534	0.18382	1.6468	0.17248
Cp723	Positive	349.319	11.579	2.8977	0.27859	3.939	0.61804	3.2323	0.76834	3.9284	0.074449
Cp724	Positive	616.307	8.91601	1.1718	0.64788	1.3669	0.52715	0.67012	0.48215	1.1546	0.38627
Cp725	Positive	292.201	9.548	1.6194	0.011691	1.661	0.052198	1.6665	0.070901	1.5588	0.62177
Cp726	Positive	482.844	11.365	1.5062	0.23995	2.1699	0.07625	2.3491	0.057838	2.3739	0.91859
Cp727	Positive	474.33	11.212	1.6488	0.10642	1.2008	0.35471	0.71005	0.20598	0.55316	0.14323
Cp728	Positive	266.08	8.09699	1.5335	0.59015	1.6549	0.3339	0.94758	0.70435	0.54753	0.538
Cp729	Positive	474.83	11.202	1.8085	0.07085	2.2424	0.11037	1.8262	0.078247	2.5099	0.11026
Cp73	Positive	634.386	10.017	4.3616	6.0588e-05	1.2228	0.60653	1.5109	0.37466	1.6269	0.38882
Cp730	Positive	468.218	6.096	0.98269	0.9526	1.1002	0.22101	0.74595	0.1414	1.3119	0.41081
Cp731	Positive	226.048	3.005	1.0153	0.55414	1.0376	0.78869	1.2542	0.87168	0.80159	0.20571
Cp732	Positive	680.945	10.378	2.9208	0.021478	4.1637	3.85e-05	2.7399	0.030295	2.3079	0.12695
Cp733	Positive	548.366	10.523	2.2598	0.0071784	2.4592	0.008505	1.9739	0.14032	1.8483	0.083487
Cp734	Positive	540.869	11.11	2.1879	0.013277	2.9033	0.00019441	2.9033	0.02596	3.2177	0.033969
Cp735	Positive	622.442	13.132	3.5762	0.62656	6.4607	0.14268	3.7453	0.62512	2.7173	0.16563
Cp736	Positive	705.393	12.957	1.0312	0.70163	1.8215	0.0066244	1.5356	0.26767	1.8952	0.074321
Cp737	Positive	475.172	11.25	0.73406	0.34844	0.93887	0.68016	0.65844	0.22554	0.63984	0.21481
Cp738	Positive	597.3	8.664	1.7647	0.79363	1.2387	0.66998	0.92445	0.59789	0.39824	0.085947
Cp739	Positive	560.242	8.039	2.0477	0.96597	1.3259	0.66948	1.2132	0.73954	0.33033	0.21196
Cp74	Positive	784.074	3.146	0.86949	0.98924	0.46969	0.70058	1.0261	0.75236	1.2725	0.89486
Cp740	Positive	148.11	3.92	1.6664	0.078674	1.5002	0.011185	1.3759	0.19809	1.4113	0.41874
Cp741	Positive	607.284	8.076	1.5359	0.18151	1.7118	0.60729	1.0518	0.9898	0.76423	0.46078
Cp742	Positive	568.418	9.163	2.604	0.0054691	2.0178	0.22051	2.0414	0.40331	1.5872	0.23424
Cp743	Positive	550.352	11.579	1.4607	0.053406	1.2288	0.36897	1.1802	0.70266	0.94875	0.91701
Cp744	Positive	731.537	10.79	2.2276	0.061618	2.7053	0.00046461	2.9088	0.0049782	1.9936	0.094779
Cp745	Positive	580.895	13.221	3.5885	0.47056	8.8592	0.034111	4.5676	0.2653	1.0128	0.66327
Cp746	Positive	555.194	5.849	1.2587	0.52296	1.1758	0.41622	1.4492	0.91518	1.287	0.46613
Cp747	Positive	294.077	8.323	1.0753	0.98684	1.207	0.61616	1.0911	0.98738	1.5432	0.4691
Cp748	Positive	502.183	5.859	0.77214	0.23345	0.81922	0.25601	0.65104	0.27045	0.98249	0.8608
Cp749	Positive	302.006	5.186	0.59687	0.54665	0.478	0.48637	0.62967	0.88908	1.3668	0.50912
Cp75	Positive	474.328	11.054	1.9276	0.037976	2.1747	0.073198	1.5414	0.66363	2.6318	0.0083672
Cp750	Positive	152.01	3.603	0.43279	0.87248	0.69186	0.98139	0.71342	0.81001	1.9874	0.51922
Cp751	Positive	368.097	9.16699	0.73124	0.22002	0.90462	0.52481	0.82403	0.422	1.2472	0.59791
Cp752	Positive	530.364	9.921	15.959	0.0017483	3.9244	0.24311	5.2492	0.11188	16.543	0.038398
Cp753	Positive	733.187	3.967	0.78054	0.57901	2.6384	0.065835	2.7151	0.96463	1.7512	0.64281
Cp754	Positive	449.807	11.12	1.348	0.41781	1.8153	0.21231	1.3318	0.57769	1.1422	0.76235
Cp755	Positive	336.015	7.114	0.56815	0.4214	1.2433	0.75469	0.74692	0.63626	1.3263	0.43446
Cp756	Positive	379.09	3.805	3.0206	0.0026289	2.5347	0.02504	3.0611	0.054653	2.5569	0.31941
Cp757	Positive	484.354	11.829	664.43	0.098467	5914.8	0.23318	2728.2	0.10209	1896	0.35592
Cp758	Positive	468.322	8.559	4.8679	0.010641	1.3349	0.58646	2.1327	0.85965	4.4462	0.018587
Cp759	Positive	606.405	10.873	1.9577	0.0048106	2.3436	0.017751	2.1014	0.16098	1.5755	0.39225
Cp76	Positive	448.1	3.608	1.4814	0.9702	1.6725	0.98775	2.3553	0.72913	3.0702	0.24516
Cp760	Positive	338.045	4.969	0.26896	0.0691	1.0606	0.37468	0.71045	0.51286	2.3652	0.15707
Cp761	Positive	128.011	11.25	0.66314	0.35043	0.84271	0.61464	0.57428	0.2175	0.4515	0.12279
Cp762	Positive	486.083	3.576	0.75905	0.36557	1.2919	0.08173	0.99368	0.90494	0.95876	0.81934
Cp763	Positive	334.071	3.963	0.81229	0.57083	1.4118	0.22335	1.5791	0.34394	1.108	0.92995
Cp764	Positive	438.36	12.399	3.4015	0.0001053	1.8338	0.042614	1.8829	0.0031293	1.9076	0.0089794
Cp765	Positive	373.195	1.866	2.0286	0.12349	1.7287	0.29522	1.3155	0.90123	0.84852	0.78323
Cp766	Positive	160.051	3.652	3.0308	0.00055466	2.3791	0.014559	2.6052	0.021776	2.5659	0.053834
Cp767	Positive	534.248	9.426	0.85891	0.42478	0.90334	0.49566	0.93227	0.64159	0.87476	0.55896
Cp768	Positive	240.064	5.015	0.78099	0.59745	1.1239	0.28182	0.80261	0.58418	0.85948	0.78263
Cp769	Positive	358.2	10.061	0.75026	0.34848	0.87122	0.59158	0.98412	0.98424	0.60625	0.24055
Cp77	Positive	963.399	6.092	1.5264	0.85773	3.2634	0.039972	1.4799	0.70338	1.2149	0.40123
Cp770	Positive	602.909	13.177	37.771	0.042908	148.68	0.021041	71.825	0.11071	4.566	0.4024
Cp771	Positive	880.575	10.783	1.0671	0.98209	1.0695	0.99924	1.0339	0.88903	0.92227	0.71579
Cp772	Positive	162.053	7.085	0.5699	0.067792	1.2011	0.6578	1.0831	0.80244	1.1561	0.81772
Cp773	Positive	295.286	12.521	0.54747	0.31461	0.8232	0.50685	0.57352	0.31494	0.55241	0.34539
Cp774	Positive	592.385	10.977	0.96254	0.57135	0.50291	0.19499	0.5322	0.057905	0.49558	0.26319
Cp775	Positive	502.137	9.145	371.6	0.04585	n.d.	n.d.	n.d.	n.d.	n.d.	n.d.
Cp776	Positive	356.053	5.726	0.51611	0.062633	0.72002	0.14749	0.71467	0.17517	0.90596	0.51125
Cp777	Positive	406.327	10.977	0.89535	0.74298	0.89962	0.70499	0.91508	0.82968	0.99045	0.67152
Cp778	Positive	508.213	4.489	2.9836	0.43085	2.3447	0.56132	1.3464	0.51762	1.1877	0.98778
Cp779	Positive	847.617	11.446	1.6971	0.023343	1.9524	0.0025422	1.7948	0.10288	1.9753	0.072289
Cp78	Positive	315.204	3.716	1.2214	0.76179	1.1851	0.52343	0.99102	0.69256	1.2837	0.89954
Cp780	Positive	304.164	10.449	1.4256	0.033984	1.0447	0.54107	1.0196	0.84894	1.1354	0.53545
Cp781	Positive	334.199	7.112	1.0816	0.25004	1.8913	0.69929	1.1552	0.4894	2.1705	0.28318
Cp782	Positive	212.068	11.591	0.44801	0.041536	0.57147	0.06571	0.46035	0.042806	0.40577	0.027522
Cp783	Positive	345.215	3.217	1.22	0.41177	1.2636	0.17293	1.1507	0.60647	1.3146	0.29366
Cp784	Positive	526.352	10.555	2.2381	0.011898	2.4064	0.008753	2.0058	0.11744	1.8356	0.08252
Cp785	Positive	872.313	7.762	2.8737	0.057642	3.334	0.69975	2.3652	0.23615	0.96617	0.71516
Cp786	Positive	532.342	11.45	4.3652	0.055531	2.634	0.084685	2.5416	0.13259	2.7269	0.30239
Cp787	Positive	302.136	7.759	2.5188	0.49487	3.0534	0.22843	1.7115	0.19121	1.274	0.41063
Cp788	Positive	408.338	10.522	0.39675	0.042138	0.85862	0.56428	0.66294	0.28506	0.66734	0.33366
Cp789	Positive	417.202	6.944	1.5142	0.80018	2.4217	0.10961	1.8059	0.83308	1.6571	0.32492
Cp79	Positive	640.475	11.44	1.9408	0.027039	2.0574	0.035637	2.1328	0.10427	1.492	0.24759
Cp790	Positive	429.38	10.032	12.379	0.45843	5.472	0.093181	4.7422	0.31985	5.0433	0.10528
Cp791	Positive	310.249	11.789	3.0291	0.12646	6.1176	0.026922	3.5225	0.26208	2.9435	0.25025
Cp792	Positive	190.157	7.884	1.7061	0.50598	1.54	0.74569	2.3629	0.096918	0.75889	0.97568
Cp793	Positive	130.043	3.381	2.3881	0.0076286	1.8604	0.87935	3.075	0.94722	2.6551	0.032893
Cp794	Positive	313.174	2.667	1.6865	0.1729	1.4049	0.60717	0.96041	0.52039	0.82725	0.48935
Cp795	Positive	515.847	11.173	2.1063	0.0015059	2.5071	0.021382	2.3783	0.03014	1.7366	0.1353
Cp796	Positive	252.208	9.547	1.6648	0.79394	1.4254	0.52491	1.2449	0.42628	1.808	0.65288
Cp797	Positive	221.026	3.633	0.91404	0.96887	1.3798	0.35689	1.6282	0.55709	1.9773	0.88876
Cp798	Positive	633.908	10.448	2.0204	0.011577	2.6996	0.0048999	1.9352	0.14159	1.8005	0.063758
Cp799	Positive	455.161	11.249	0.47792	0.33549	0.4982	0.48418	0.36887	0.16775	0.38286	0.30345
Cp8	Positive	300.157	10.582	0.97143	0.57775	1.7065	0.49474	1.3133	0.99203	0.65122	0.26437
Cp800	Positive	761.547	9.148	9.5481	0.00048732	9.166	0.0082597	9.13	0.021167	6.4712	0.020764
Cp801	Positive	335.069	7.296	0.66916	0.81968	0.92235	0.95575	0.52661	0.59315	1.3884	0.39788
Cp802	Positive	540.375	11.266	1.8964	0.0061231	2.4436	0.00021886	1.9736	0.056235	2.3514	0.022694
Cp803	Positive	784.074	2.056	0.85336	0.96991	0.48417	0.69489	1.07	0.75695	1.3233	0.87356
Cp804	Positive	385.194	3.583	0.50319	0.033407	0.57048	0.29249	0.75048	0.27437	0.54451	0.11051
Cp805	Positive	519.229	6.83	1.8777	0.28335	0.70258	0.21164	0.97834	0.32114	0.14762	0.062854
Cp806	Positive	267.257	11.664	0.8475	0.97293	1.042	0.87164	0.56549	0.81282	1.0054	0.47332
Cp807	Positive	497.181	9.142	174.24	0.50585	n.d.	n.d.	n.d.	n.d.	n.d.	n.d.
Cp808	Positive	257.05	1.624	2.8898	0.00042865	1.8314	0.91348	2.2866	0.89715	1.7656	0.38996
Cp809	Positive	603.288	8.194	2.0547	0.10707	2.6688	0.22291	1.0135	0.54314	1.7518	0.34205
Cp81	Positive	290.119	10.426	0.46865	0.035536	0.66525	0.10425	0.57064	0.056161	0.97935	0.84483
Cp810	Positive	443.236	5.012	0.80781	0.63912	1.1504	0.22178	0.82036	0.61513	0.86756	0.81934
Cp811	Positive	502.301	5.071	0.84964	0.77973	0.93189	0.76872	0.72433	0.6778	0.81305	0.86787
Cp812	Positive	380.041	4.341	0.73387	0.27767	1.2942	0.67559	0.84828	0.48713	0.96376	0.42286
Cp813	Positive	688.366	13.194	1.1153	0.53422	1.8392	0.014119	1.5038	0.15612	2.0738	0.048482
Cp814	Positive	338.173	6.651	0.64266	0.041952	0.9045	0.42984	0.88317	0.42375	0.95147	0.65101
Cp815	Positive	470.339	10.189	1.5407	0.064469	0.6214	0.087649	0.48358	0.019786	1.3282	0.15206
Cp816	Positive	352.257	9.151	354.62	0.18843	141.59	0.69107	n.d.	n.d.	291.22	0.35592
Cp817	Positive	249.172	3.905	5.7355	0.007225	6.5756	4.03e-06	6.2473	0.28135	7.6024	0.058064
Cp818	Positive	537.86	11.142	1.5537	0.12522	1.9056	0.022411	1.8799	0.14653	1.6406	0.35967
Cp819	Positive	585.443	10.84	2.0208	0.025582	1.6985	0.1179	1.5196	0.35205	1.3279	0.25386
Cp82	Positive	958.562	13.881	0.87161	0.53284	0.71074	0.32466	0.83064	0.60369	1.4763	0.48741
Cp820	Positive	558.197	7.526	3.3589	0.16099	5.0921	0.24954	7.0006	0.27653	4.7679	0.1207
Cp821	Positive	231.023	7.062	1.1236	0.67674	1.6105	0.17387	1.6591	0.21588	1.0779	0.74848
Cp822	Positive	172.11	7.746	0.4409	0.25107	0.76001	0.31404	0.48848	0.10413	0.72989	0.50729
Cp823	Positive	292.183	3.364	1.9845	0.0012597	1.7781	0.00022936	1.2759	0.55244	1.6842	0.2136
Cp824	Positive	150.14	9.393	1.4752	0.055438	1.4736	0.035171	1.4794	0.042187	1.4359	0.26289
Cp825	Positive	118.081	7.29	1576.1	0.31712	8454.3	0.39666	2043.7	0.31684	1403.9	0.35592
Cp826	Positive	319.154	11.421	0.48437	0.0036801	0.72601	0.13239	0.69712	0.20464	0.66913	0.19542
Cp827	Positive	313.097	4.095	0.91218	0.55398	0.48592	0.031225	0.72095	0.39664	0.73392	0.41223
Cp828	Positive	424.333	9.044	2.1572	0.0033284	0.71203	0.2958	0.84576	0.77382	1.9969	0.11161
Cp829	Positive	166.026	3.551	1.0119	0.7956	0.96627	0.91454	0.5866	0.21212	0.50426	0.19913
Cp83	Positive	238.12	8.25201	0.20611	0.004638	0.44538	0.03686	0.56388	0.15656	0.46932	0.078919
Cp830	Positive	407.162	7.47	0.56729	0.052632	1.3102	0.5559	1.1912	0.95377	0.76075	0.33948
Cp831	Positive	418.223	8.667	2.0529	0.53739	1.2269	0.42121	0.73879	0.67497	0.41567	0.79157
Cp832	Positive	172.144	9.919	0.50036	0.097515	0.92903	0.70277	0.87941	0.70878	0.96732	0.89482
Cp833	Positive	278.062	6.829	1.6411	0.54749	0.71563	0.28043	0.82162	0.28215	0.21051	0.13859
Cp834	Positive	238.142	3.024	0.53005	0.040835	0.69254	0.093045	0.57462	0.062165	0.44792	0.041356
Cp835	Positive	686.507	11.406	1.7971	0.015719	1.67	0.034993	1.769	0.2107	1.2978	0.35395
Cp836	Positive	562.13	6.068	1235.4	0.31693	7226.1	0.47303	n.d.	n.d.	n.d.	n.d.
Cp837	Positive	494.337	11.061	1.6257	0.93379	1.723	0.33688	1.629	0.59331	1.4051	0.37814
Cp838	Positive	489.22	7.078	1.1187	0.52577	0.55059	0.24728	0.79583	0.23727	0.10078	0.063314
Cp839	Positive	534.866	10.548	2.4463	0.0062055	2.6678	0.0038974	2.1752	0.094036	1.9695	0.069965
Cp84	Positive	288.266	11.623	2.0074	0.52094	2.9	0.11372	2.5738	0.072789	1.6093	0.53905
Cp840	Positive	517.315	9.387	1.6817	0.25316	1.344	0.85938	1.0946	0.88876	3.2045	0.2412
Cp841	Positive	547.225	6.976	1.7246	0.79201	2.1553	0.19662	0.81763	0.81173	0.6266	0.97245
Cp842	Positive	326.327	12.01	0.72126	0.44598	0.8368	0.33512	0.38388	0.1084	0.7054	0.36811
Cp843	Positive	469.164	3.962	0.7157	0.33711	2.0766	0.83572	2.7049	0.41223	1.4226	0.53886
Cp844	Positive	209.983	5.124	1.2043	0.23974	1.2722	0.028558	1.1679	0.25816	1.8795	0.29825
Cp845	Positive	380.076	4.407	0.74305	0.32057	1.2469	0.33132	1.4825	0.40774	1.1341	0.79411
Cp846	Positive	333.133	4.095	0.56243	0.23695	0.77124	0.21074	0.73438	0.41586	0.72884	0.32065
Cp847	Positive	452.349	11.789	19.465	0.0012619	6.1165	0.036323	8.3773	0.26804	12.682	0.31268
Cp848	Positive	146.073	7.799	0.77605	0.16358	0.98161	0.70313	0.96819	0.66168	1.0281	0.87863
Cp849	Positive	499.162	4.679	0.21439	0.065162	0.41513	0.16456	0.49975	0.17514	0.51124	0.29127
Cp85	Positive	132.068	2.604	0.72711	0.030224	0.79679	0.14021	0.71182	0.15202	0.83495	0.32706
Cp850	Positive	656.471	10.798	2.8093	0.02891	1.9327	0.8613	1.9134	0.23967	1.0179	0.90372
Cp851	Positive	306.004	6.422	1.404	0.3846	2.1308	0.071805	1.6993	0.46586	2.0051	0.076234
Cp852	Positive	240.028	5.732	1.6905	0.81942	1.6452	0.68934	1.4132	0.48516	0.50324	0.27483
Cp853	Positive	437.096	4.433	0.81394	0.83469	1.239	0.34631	1.5205	0.57297	2.4011	0.19003
Cp854	Positive	395.251	1.335	0.77711	0.14177	1.0181	0.77891	1.1232	0.83336	1.0454	0.75401
Cp855	Positive	573.24	7.128	4.6294	0.0074544	2.741	0.40354	1.7817	0.86517	1.0363	0.46375
Cp856	Positive	601.922	10.901	1.7326	0.53466	2.6483	0.0035621	2.0832	0.50834	2.416	0.24126
Cp857	Positive	431.185	11.249	0.64554	0.4249	0.91728	0.48626	0.48313	0.3517	0.34528	0.25398
Cp858	Positive	585.205	5.614	1.3062	0.20843	1.7107	0.2141	1.2785	0.7926	1.5794	0.34585
Cp859	Positive	282.155	3.37	1.719	0.03167	1.4613	0.10466	1.474	0.41122	1.5511	0.18671
Cp86	Positive	416.167	4.344	0.68238	0.28277	1.46	0.69783	0.89928	0.61714	1.16	0.94346
Cp860	Positive	560.378	12.368	2.2256	0.092916	1.8757	0.099305	2.1487	0.10653	1.9491	0.29209
Cp861	Positive	330.274	9.908	1.2876	0.1905	0.81547	0.81804	0.76562	0.92272	1.3172	0.99273
Cp862	Positive	286.204	8.243	0.22155	0.003118	0.54237	0.095182	0.42752	0.059063	0.56815	0.31828
Cp863	Positive	955.908	6.099	1.6754	0.41811	5.5851	0.012097	2.1508	0.83056	1.6695	0.47428
Cp864	Positive	479.818	10.629	2.0657	0.047155	2.1316	0.011918	1.7507	0.19854	1.5373	0.20966
Cp865	Positive	536.325	9.038	3.0482	0.0024172	0.67856	0.42859	0.76855	0.77642	2.8371	0.098891
Cp866	Positive	382.231	7.945	28.014	0.31794	20579	1.98e-06	114.59	0.044009	27.95	0.35592
Cp867	Positive	513.278	7.106	0.71837	0.31954	1.8321	0.39059	1.3787	0.60925	1.9576	0.14097
Cp868	Positive	288.158	8.914	1.2186	0.97743	1.2256	0.22482	0.63113	0.91232	1.2847	0.23629
Cp869	Positive	401.168	6.148	2.2391	0.016401	2.5073	0.0027616	4.2071	0.020291	4.0932	0.022909
Cp87	Positive	648.404	11.267	1.1169	0.97157	1.0859	0.94156	1.2517	0.67491	1.1422	0.19346
Cp870	Positive	526.295	11.42	0.27093	0.13329	0.59376	0.28684	0.62944	0.36965	0.61196	0.24406
Cp871	Positive	243.219	9.393	1.4769	0.036215	1.4375	0.040363	1.4658	0.049398	1.3973	0.20252
Cp872	Positive	410.351	11.819	1.3939	0.11903	0.85692	0.52351	0.98379	0.97531	1.1024	0.62601
Cp873	Positive	606.405	11.023	1.2407	0.37486	1.555	0.19837	1.25	0.79471	1.2946	0.45548
Cp874	Positive	339.991	8.63901	0.42854	0.026612	0.60417	0.060793	0.50964	0.0081517	0.8194	0.40923
Cp875	Positive	480.127	5.745	4.4762	0.00017974	4.2395	0.0015433	5.1992	0.0012516	3.5554	0.11705
Cp876	Positive	304.152	7.274	3.6422	0.40108	4.6391	0.71074	2.2491	0.81706	0.89662	0.28631
Cp877	Positive	220.111	8.994	0.67157	0.37274	0.93279	0.76701	0.6148	0.24361	0.6821	0.46881
Cp878	Positive	186.089	6.338	0.75115	0.32946	1.0434	0.52932	1.5114	0.46722	0.41057	0.24709
Cp879	Positive	297.137	2.9	0.3992	0.28561	0.62476	0.40873	0.50154	0.36755	0.46008	0.32096
Cp88	Positive	490.202	6.094	1.0728	0.65535	1.3552	0.057884	0.97949	0.87637	1.1458	0.49371
Cp880	Positive	317.096	8.664	1.7803	0.78504	1.1555	0.34588	0.91962	0.57485	0.16608	0.06418
Cp881	Positive	359.159	3.382	1.9891	0.0023685	1.6732	0.10478	2.2895	0.041795	1.9305	0.014359
Cp882	Positive	318.132	4.288	1.97	0.32186	1.3483	0.89581	1.4784	0.66933	1.0084	0.91577
Cp883	Positive	498.358	11.311	1.2634	0.43611	1.1879	0.42636	1.0932	0.56703	1.5796	0.30276
Cp884	Positive	433.285	11.311	1.0989	0.53523	1.1383	0.47741	1.0177	0.89156	0.92352	0.6358
Cp885	Positive	209.984	4.234	0.68487	0.082646	0.9188	0.46889	0.8507	0.33578	1.1114	0.68549
Cp886	Positive	318.132	5.325	1.0978	0.87912	1.2546	0.53995	1.2064	0.70085	0.99208	0.98365
Cp887	Positive	310.208	9.706	0.41967	0.13328	0.43742	0.1587	0.55058	0.15655	0.72425	0.33586
Cp888	Positive	322.142	10.04	0.90462	0.40187	1.5489	0.90151	1.6291	0.90034	0.78035	0.8181
Cp889	Positive	356.108	4.763	0.98719	0.5597	1.3835	0.13016	1.4332	0.32214	1.1931	0.54842
Cp89	Positive	416.287	10.686	2.3035	0.015974	2.24	0.016096	1.9584	0.17982	1.4221	0.33444
Cp890	Positive	361.29	9.198	1.9852	0.12206	1.4184	0.82598	0.90296	0.67071	2.1975	0.88748
Cp891	Positive	296.092	8.21	1.1035	0.85764	1.0621	0.92209	1.0297	0.87678	0.58071	0.12219
Cp892	Positive	110.037	1.509	2.614	0.0098649	1.1695	0.75946	1.3343	0.69382	1.0617	0.97588
Cp893	Positive	210.158	8.507	15.414	0.068634	16.321	0.061646	15.675	0.036274	3.6158	0.50076
Cp894	Positive	336.161	12.04	1.7165	0.34688	1.0118	0.6654	1.0406	0.58055	1.093	0.88001
Cp895	Positive	655.922	10.424	1.9373	0.022027	2.6704	0.005157	1.831	0.16782	1.6123	0.082884
Cp896	Positive	414.203	9.154	1.0722	0.96762	1.0891	0.85554	1.0566	0.88875	1.2666	0.15975
Cp897	Positive	611.351	8.91601	1.1479	0.63992	1.3828	0.52334	0.71097	0.89821	1.007	0.42454
Cp898	Positive	206.166	10.447	2.1366	0.0019372	0.97384	0.84403	0.98094	0.71505	1.5685	0.20005
Cp899	Positive	499.224	6.838	7.7967	0.010008	2.8496	0.6058	5.0878	0.29575	4.016	0.15411
Cp9	Positive	498.335	11.422	0.33457	0.00051456	0.61798	0.11986	0.64142	0.2153	0.6306	0.22495
Cp90	Positive	449.189	3.572	0.75593	0.42985	1.3496	0.10268	0.97991	0.86243	0.93473	0.82874
Cp900	Positive	493.834	11.202	1.9818	0.023681	2.5878	0.009467	2.0177	0.070429	1.963	0.081021
Cp901	Positive	731.539	11.216	1.7365	0.75958	1.4688	0.45253	1.0918	0.37546	0.74719	0.17899
Cp902	Positive	407.121	4.252	1.9859	0.029818	1.7534	0.19245	2.2655	0.16878	1.8345	0.35783
Cp903	Positive	556.879	10.522	2.2641	0.010242	2.5873	0.0055818	2.0184	0.122	1.9162	0.063678
Cp904	Positive	349.198	4.627	1.5193	0.34366	1.2939	0.23292	1.1592	0.78292	1.1345	0.74096
Cp905	Positive	302.136	7.933	0.85098	0.56791	1.0983	0.84582	1.0829	0.79064	0.66011	0.22029
Cp906	Positive	320.019	3.325	0.4926	0.011824	1.0448	0.61141	0.68333	0.21276	0.83157	0.57822
Cp907	Positive	326.191	11.192	0.59622	0.015796	0.84321	0.26674	0.93152	0.57213	1.0329	0.91152
Cp908	Positive	331.07	3.887	0.59094	0.083655	0.71713	0.24998	0.51146	0.22369	0.51219	0.25048
Cp909	Positive	158.13	9.436	0.54203	0.057091	0.72658	0.22237	0.76959	0.41274	0.72585	0.41792
Cp91	Positive	789.579	11.184	2.3611	0.030257	2.1121	0.10215	1.9128	0.27731	1.5179	0.41327
Cp910	Positive	304.165	10.523	0.78382	0.43857	0.70012	0.13312	0.63659	0.03992	0.61792	0.029794
Cp911	Positive	236.109	9.065	0.63795	0.063509	0.85397	0.29682	0.84328	0.32811	0.92756	0.48815
Cp912	Positive	350.019	3.976	0.83064	0.85709	1.531	0.073293	1.157	0.81355	1.496	0.25856
Cp913	Positive	464.161	8.518	437.46	0.19185	n.d.	n.d.	n.d.	n.d.	n.d.	n.d.
Cp914	Positive	430.309	11.433	1.2039	0.2377	1.7422	0.10731	2.172	0.032228	1.6976	0.16428
Cp915	Positive	184.073	9.65	0.98631	0.25684	1.412	0.74054	1.1287	0.26832	0.13124	0.019501
Cp916	Positive	562.882	11.078	1.7718	0.02613	2.4252	0.0022954	2.0234	0.11665	2.557	0.042306
Cp917	Positive	535.384	11.14	2.1089	0.0083994	2.7551	0.00041251	2.3418	0.025871	2.8164	0.037948
Cp918	Positive	288.266	11.782	2.4614	0.21267	2.9159	0.18307	2.3945	0.050026	1.7621	0.98193
Cp919	Positive	264.156	4.624	0.46111	0.87803	1.7549	0.40589	1.5893	0.20243	1.3587	0.52562
Cp92	Positive	495.18	6.093	1.2932	0.46383	1.893	0.051057	1.1354	0.94135	1.2681	0.42304
Cp920	Positive	504.185	5.731	4.0055	0.12531	4.4657	0.018599	3.203	0.34556	1.3332	0.55677
Cp921	Positive	284.09	3.55	0.69388	0.24869	0.85992	0.44261	0.65438	0.20488	0.63362	0.22951
Cp922	Positive	292.211	9.55701	1.655	0.01222	1.841	0.036932	1.8432	0.059895	1.677	0.76841
Cp923	Positive	1078.58	11.422	0.28578	0.00063372	0.63271	0.32476	0.61341	0.35332	0.64496	0.22845
Cp924	Positive	133.04	4.396	0.73839	0.76821	1.9644	0.0052666	1.6075	0.87924	3.4639	0.20437
Cp925	Positive	288.264	11.119	1.5692	0.44289	1.4213	0.95541	1.5189	0.50895	1.4909	0.28932
Cp926	Positive	471.821	11.235	1.4669	0.27027	1.7847	0.017531	1.4753	0.12586	1.9538	0.29091
Cp927	Positive	775.562	10.755	1.9001	0.31075	1.7051	0.27035	1.5835	0.40338	1.0215	0.9003
Cp928	Positive	475.315	11.249	0.73457	0.1685	0.78931	0.43857	0.68909	0.42584	0.47274	0.27218
Cp929	Positive	280.241	11.556	0.1713	0.019834	0.81014	0.44064	1.025	0.8457	1.0401	0.41983
Cp93	Positive	664.397	10.112	2.4816	0.000835	1.3489	0.28599	1.6725	0.23564	1.771	0.11705
Cp930	Positive	304.152	8.759	1.0087	0.62097	1.3976	0.70463	0.98284	0.69862	0.62872	0.11074
Cp931	Positive	299.191	3.938	1.3289	0.47496	1.3078	0.17133	1.0757	0.84118	1.1843	0.51762
Cp932	Positive	423.156	5.435	1.2374	0.81315	2.0414	0.017964	1.7538	0.64834	1.1347	0.97978
Cp933	Positive	184.073	3.838	0.78779	0.2685	0.95095	0.63514	1.2567	0.83935	0.80936	0.43323
Cp934	Positive	333.229	6.685	0.34364	0.0022089	0.67803	0.11917	0.66294	0.12133	0.82166	0.26904
Cp935	Positive	452.329	9.582	3.5311	0.041694	1.395	0.88279	1.7899	0.82329	1.8612	0.11522
Cp936	Positive	254.224	10.655	0.7723	0.25959	1.0509	0.77119	1.0584	0.6775	1.2111	0.88922
Cp937	Positive	356.11	6.141	0.857	0.60418	1.1866	0.60666	1.3207	0.71797	1.4161	0.66038
Cp938	Positive	346.023	4.396	0.90503	0.7114	1.8183	0.0017126	1.3337	0.2712	2.575	0.082853
Cp939	Positive	532.373	13.889	1.9497	0.015814	1.539	0.024283	0.98668	0.75516	1.7596	0.21883
Cp94	Positive	684.478	11.253	2.5131	0.029025	3.0501	0.0063904	1.6689	0.54358	1.5829	0.2725
Cp940	Positive	430.291	12.365	1.0449	0.99897	1.0261	0.55635	0.61805	0.6467	0.68426	0.92484
Cp941	Positive	438.802	10.658	2.408	0.010323	2.345	0.015849	1.9793	0.19125	1.6459	0.17405
Cp942	Positive	394.276	10.716	1.9133	0.029443	1.6808	0.047675	1.7408	0.15663	1.3553	0.24641
Cp943	Positive	270.214	10.319	2.8366	0.00046966	2.3964	0.006204	2.5394	0.0027291	1.387	0.30205
Cp944	Positive	708.466	11.52	2.4093	0.0030557	1.6426	0.95388	1.5988	0.76014	2.2079	0.54886
Cp945	Positive	687.293	7.76401	2.7813	0.12228	3.125	0.71416	2.1899	0.37054	0.8608	0.63701
Cp946	Positive	256.058	6.047	1.901	0.21412	1.9917	0.18974	1.5351	0.79556	1.4418	0.67429
Cp947	Positive	434.049	4.826	1.0999	0.5961	0.90712	0.43791	1.1261	0.38251	1.8101	0.4799
Cp948	Positive	435.204	5.891	50.31	0.0064379	148.51	3.84e-12	100.6	9.8376e-06	19.196	0.113
Cp949	Positive	482.339	12.117	1.8927	0.029109	1.7573	0.31331	2.0019	0.4244	1.0459	0.5792
Cp95	Positive	610.161	13.204	0.9264	0.78689	0.77493	0.50685	0.81152	0.39382	1.0685	0.60407
Cp950	Positive	358.182	12.001	0.69752	0.077835	0.74126	0.48149	0.70376	0.14629	1.0508	0.86995
Cp951	Positive	324.946	5.428	0.91745	0.30336	1.0078	0.8438	1.0085	0.93188	0.98346	0.86521
Cp952	Positive	292.209	9.55701	1.5739	0.54306	1.7688	0.54044	1.3068	0.31709	1.9562	0.60164
Cp953	Positive	296.11	1.303	1.1189	0.41598	1.2332	0.1375	1.2142	0.52968	2.2368	0.21485
Cp954	Positive	301.297	9.11099	0.61076	0.70556	0.57256	0.54711	0.5056	0.48989	1.2975	0.48254
Cp955	Positive	486.333	9.453	1.5885	0.1395	0.97581	0.96793	0.95556	0.90966	1.0336	0.9247
Cp956	Positive	259.056	7.238	1.3345	0.38233	1.4265	0.4715	1.4543	0.34956	1.1726	0.73559
Cp957	Positive	581.886	10.926	1.9289	0.014372	2.3728	0.0235	2.2723	0.054676	2.088	0.07539
Cp958	Positive	100.089	5.907	0.56434	0.069115	1.1365	0.87714	1.0015	0.80116	1.2089	0.54147
Cp959	Positive	316.084	9.844	0.39717	0.21864	0.5733	0.10255	0.38841	0.060579	0.89491	0.7684
Cp96	Positive	1197.51	6.087	1.5935	0.77691	4.8192	0.14594	1.6061	0.91744	1.1232	0.80045
Cp960	Positive	504.309	10.8	3.3849	0.03563	1.7761	0.56867	2.0616	0.62797	1.6234	0.60779
Cp961	Positive	331.272	9.57101	3.2926	0.0043561	8.2209	0.68488	6.5213	0.006272	5.2925	0.13437
Cp962	Positive	357.274	11.289	3.555	0.40199	5.2373	0.58429	4.9731	0.32656	2.634	0.9296
Cp963	Positive	496.346	11.497	1.2615	0.31767	1.5624	0.037922	1.9744	0.054891	1.9824	0.06275
Cp964	Positive	442.091	5.301	2.0139	0.83264	1.3947	0.95751	2.243	0.66505	2.9646	0.77464
Cp965	Positive	200.123	6.917	0.72141	0.25001	0.98685	0.95883	0.96719	0.8361	0.86733	0.75709
Cp966	Positive	260.016	6.912	0.75678	0.27078	0.92859	0.71437	0.93711	0.72596	0.89787	0.79895
Cp967	Positive	721.803	6.101	4.9346	0.5911	23.251	2.09e-09	10.53	0.083404	8.3057	0.01645
Cp968	Positive	440.382	12.801	2231.6	0.040308	4925.2	0.39677	1201.2	0.3168	4230	0.13431
Cp969	Positive	701.527	11.406	2.0144	0.015193	1.8794	0.034998	1.9384	0.14692	1.6013	0.15257
Cp97	Positive	833.606	11.305	1.6893	0.069701	1.8408	0.02031	1.9934	0.18964	1.9592	0.21966
Cp970	Positive	250.047	4.242	1.7702	0.034359	2.4013	5.82e-05	1.6464	0.44565	2.528	0.47471
Cp971	Positive	440.263	10.59	0.74883	0.20622	1.1233	0.99401	1.0101	0.71948	0.72128	0.089033
Cp972	Positive	488.348	7.727	3.5226	0.00086745	1.3405	0.29931	1.517	0.87408	1.7552	0.2034
Cp973	Positive	275.136	9.069	0.66952	0.083074	0.85337	0.31033	0.84375	0.38607	1.0407	0.88202
Cp974	Positive	275.993	3.575	0.80691	0.41336	1.289	0.15209	0.95389	0.74666	0.89144	0.66513
Cp975	Positive	308.074	7.646	3.2134	0.074916	1.7672	0.46941	1.0997	0.19203	0.50851	0.15175
Cp976	Positive	230.079	6.262	2.1602	0.026559	2.4385	0.73121	1.7595	0.78128	1.4722	0.53768
Cp977	Positive	436.157	3.871	13.166	0.0045685	3.7436	0.24733	2.3456	0.41079	0.50993	0.89217
Cp978	Positive	380.041	3.325	0.48108	0.017459	0.90435	0.51739	0.67879	0.41874	1.0278	0.79115
Cp979	Positive	382.149	11.308	0.26069	0.023208	0.48796	0.22813	0.32499	0.028588	0.79628	0.61547
Cp98	Positive	172.1	4.443	0.46207	0.0046305	0.76535	0.16425	0.76776	0.24006	0.71828	0.19624
Cp980	Positive	320.09	8.193	1.4496	0.4023	2.0447	0.79741	1.2343	0.45648	1.2423	0.50081
Cp981	Positive	225.208	10.373	0.72247	0.46064	0.57636	0.23551	0.44683	0.22991	0.50374	0.14914
Cp982	Positive	548.882	10.962	1.8264	0.18529	2.4857	0.018913	2.3611	0.054061	2.5153	0.044694
Cp983	Positive	204.073	8.408	0.67314	0.017475	0.93244	0.59492	0.82417	0.34389	0.93424	0.6651
Cp984	Positive	370.096	11.444	1.097	0.56528	0.98073	0.52839	0.78323	0.32292	0.99567	0.7437
Cp985	Positive	224.068	4.132	12.106	0.0055864	5.2937	0.00061261	6.5436	0.01764	6.247	0.10711
Cp986	Positive	440.357	10.674	0.76532	0.24089	0.79023	0.25211	0.82451	0.36829	0.7065	0.24958
Cp987	Positive	608.244	8.194	1.6188	0.85853	2.1434	0.19946	1.1864	0.4638	1.3894	0.70026
Cp988	Positive	368.128	5.848	0.56545	0.044984	0.64532	0.074318	0.62915	0.17427	0.63472	0.20801
Cp989	Positive	376.053	8.41601	0.41345	0.14874	0.67264	0.10667	0.52377	0.014958	1.1502	0.9364
Cp99	Positive	300.157	10.582	0.96628	0.57184	1.6891	0.50033	1.301	0.98526	0.65297	0.26055
Cp990	Positive	474.83	11.364	1.7087	0.056227	2.3403	0.01791	2.2344	0.11917	3.0469	0.0095909
Cp991	Positive	154.026	1.835	0.87746	0.64075	1.1921	0.94915	1.2733	0.60278	1.4334	0.52181
Cp992	Positive	225.173	12.507	1.1506	0.58941	1.2404	0.53757	0.70709	0.1847	1.4581	0.53984
Cp993	Positive	648.406	11.037	1.2391	0.34831	0.65708	0.15012	0.97892	0.81928	1.4976	0.41104
Cp994	Positive	474.206	6.623	0.76125	0.95382	1.6564	0.83353	0.71803	0.63805	2.1266	0.92136
Cp995	Positive	262.049	5.907	0.45765	0.20906	1.1482	0.63136	1.0012	0.9748	1.1215	0.75004
Cp996	Positive	148.016	6.79099	0.74541	0.31863	0.94272	0.87992	0.94719	0.88165	0.91253	0.87671
Cp997	Positive	578.892	10.497	2.2532	0.0073694	2.6752	0.0044285	2.0454	0.095491	1.9772	0.057706
Cp998	Positive	292.201	9.54101	1.8152	0.0064954	1.8878	0.041929	1.8777	0.058261	1.778	0.59508
Cp999	Positive	294.121	3.521	0.68613	0.33931	0.70964	0.29485	0.41497	0.04317	0.81663	0.38291
Cp.1	Negative	468.221	6.053	1.3308	0.3787	1.9021	0.062884	1.2006	0.94793	1.2904	0.40711
Cp.10	Negative	438.21	6.381	1.5294	0.3783	1.7682	0.24699	1.8763	0.59399	1.8144	0.14668
Cp.100	Negative	426.21	4.98	0.83917	0.67628	1.0985	0.35728	0.7883	0.51674	0.78651	0.65762
Cp.1000	Negative	386.122	3.991	1.8938	0.83203	1.5764	0.53667	2.5827	0.066909	3.5762	0.021718
Cp.1001	Negative	530.359	9.876	16.5	0.0026765	3.1721	0.27556	5.63	0.099447	15.085	0.033808
Cp.1002	Negative	552.218	5.753	1.8761	0.028201	1.0763	0.93921	1.0685	0.56834	0.96382	0.73237
Cp.1003	Negative	514.005	4.214	1.0628	0.96139	0.6432	0.8856	0.81471	0.92945	0.57181	0.55689
Cp.1004	Negative	544.236	6.054	0.96815	0.38258	1.429	0.83072	1.0924	0.56757	1.0712	0.62715
Cp.1005	Negative	283.962	3.556	0.48841	0.86051	0.62185	0.7948	0.7815	0.815	2.0245	0.51744
Cp.1006	Negative	611.144	6.051	1.1616	0.63061	1.5231	0.0098357	0.83596	0.92958	1.4968	0.33524
Cp.1007	Negative	562.154	5.13	1.9293	0.18358	1.8756	0.030576	2.2033	0.22338	1.359	0.28209
Cp.1008	Negative	438.14	2.876	0.62976	0.13442	0.88556	0.50332	0.97978	0.60743	0.83613	0.51009
Cp.1009	Negative	444.199	3.414	2.0819	0.0039116	1.3428	0.26352	1.7226	0.15267	1.9168	0.069699
Cp.101	Negative	650.215	9.42001	0.57089	0.11339	0.92409	0.65293	0.97283	0.93136	1.0269	0.98875
Cp.1010	Negative	436.106	7.036	0.44786	0.204	0.56012	0.25004	0.97161	0.45143	1.7029	0.74154
Cp.1011	Negative	728.257	8.206	0.4203	0.58516	0.49874	0.52333	0.70581	0.75755	0.95276	0.45114
Cp.1012	Negative	544.177	4.932	0.63392	0.67331	1.3945	0.65365	0.72986	0.39795	2.3727	0.18363
Cp.1013	Negative	716.39	11.103	2.2871	0.00089795	1.4385	0.2121	1.628	0.26981	1.0648	0.83039
Cp.1014	Negative	658.267	7.589	2.8002	0.84977	2.2848	0.70816	3.2145	0.073887	1.1409	0.97062
Cp.1015	Negative	568.342	10.463	0.715	0.2044	0.91604	0.64367	0.5976	0.25872	0.71045	0.063827
Cp.1016	Negative	502.365	11.707	2.179	0.0066013	1.4482	0.96741	3.3349	0.95577	1.9222	0.26184
Cp.1017	Negative	432.037	6.661	0.71225	0.35697	1.0966	0.65358	0.80802	0.41869	1.4432	0.54047
Cp.1018	Negative	356.109	5.379	1.436	0.50117	1.9166	0.60552	1.3026	0.45305	0.82149	0.41662
Cp.1019	Negative	464.154	3.73	0.20327	0.10519	0.84055	0.30787	0.53019	0.32683	0.33036	0.15886
Cp.102	Negative	234.111	9.03299	0.6485	0.039544	0.87655	0.33838	0.88908	0.44372	0.96953	0.52959
Cp.1020	Negative	394.109	8.96	0.78827	0.57539	0.90609	0.71834	0.64775	0.22647	0.80536	0.72931
Cp.1021	Negative	592.336	11.692	1.052	0.6155	0.68513	0.073297	0.72582	0.30576	0.85305	0.27703
Cp.1022	Negative	138.031	3.352	1.0682	0.85331	1.2941	0.46562	1.3961	0.53895	2.064	0.11275
Cp.1023	Negative	408.149	8.48499	2.4216	0.10262	2.7862	0.44774	2.9966	0.42259	0.91776	0.96551
Cp.1024	Negative	562.335	10.304	1.6281	0.17253	0.84013	0.40079	0.79907	0.4171	1.1892	0.95387
Cp.1025	Negative	422.212	6.622	357.76	0.31696	9862.3	4.2808e-05	3119.3	0.00076025	364.84	0.13406
Cp.1026	Negative	286.051	3.655	1.2109	0.60483	0.90801	0.6402	1.0375	0.54887	0.86191	0.61736
Cp.1027	Negative	376.101	3.468	1.8438	0.10385	1.5802	0.5548	1.2234	0.71676	0.76301	0.5171
Cp.1028	Negative	666.246	11.332	0.5118	0.001252	0.64959	0.062851	0.69324	0.1691	0.75044	0.22021
Cp.1029	Negative	646.263	11.332	0.75857	0.078162	0.88195	0.4274	0.77228	0.24929	0.88661	0.50314
Cp.103	Negative	458.085	3.698	1.1455	0.65184	0.64604	0.90915	1.5156	0.99201	2.8217	0.28424
Cp.1030	Negative	690.073	3.921	1.6803	0.12768	1.8117	0.057911	2.4806	0.18801	1.8528	0.14707
Cp.1031	Negative	601.163	5.793	1.4011	0.93821	1.2971	0.86117	1.6831	0.22297	1.5844	0.93215
Cp.1032	Negative	368.204	6.044	1.2495	0.19846	1.0407	0.21886	1.0447	0.76283	1.2602	0.38662
Cp.1033	Negative	274.069	1.706	3.1329	0.076011	2.1504	0.096223	1.5348	0.57591	1.2698	0.95483
Cp.1034	Negative	424.159	4.662	0.4205	0.24155	0.77826	0.60525	0.75595	0.58356	0.85981	0.45045
Cp.1035	Negative	535.191	7.121	3.5576	0.1372	1.51	0.95072	2.1383	0.82897	0.53924	0.90278
Cp.1036	Negative	538.238	12.351	0.86582	0.45549	0.81766	0.51811	0.92635	0.69455	0.74169	0.29531
Cp.1037	Negative	1419.34	11.328	0.4461	0.00096568	0.63962	0.10743	0.79767	0.38543	0.59538	0.10084
Cp.1038	Negative	304.08	1.46	2.9802	3.8211e-06	1.7093	0.050875	2.1357	0.061683	1.4383	0.41792
Cp.1039	Negative	464.188	3.877	0.94859	0.6747	0.91148	0.53779	0.96271	0.65303	1.0144	0.86677
Cp.104	Negative	164.047	4.777	0.60351	0.10586	0.87233	0.34585	0.91608	0.39971	0.65894	0.08607
Cp.1040	Negative	300.085	2.235	1.8879	0.85105	2.7633	0.9149	2.0223	0.58287	6.2683	0.00056942
Cp.1041	Negative	574.151	4.492	4.6012	0.82799	2.5693	0.88089	2.7262	0.59671	0.0035183	0.13442
Cp.1042	Negative	467.536	4.068	1.1164	0.76776	0.42435	0.56334	1.3982	0.73309	0.95356	0.98107
Cp.1043	Negative	394.055	4.945	0.53604	0.84342	0.51282	0.79432	1.0396	0.64444	4.7996	0.17878
Cp.1044	Negative	648.383	8.021	1.4414	0.12583	1.5686	0.97387	1.5953	0.62089	1.0314	0.97527
Cp.1045	Negative	374.054	9.4	0.30621	0.064506	0.49302	0.2053	0.36376	0.087933	0.9508	0.89501
Cp.1046	Negative	272.163	7.329	0.62532	0.15552	0.95157	0.65304	1.0836	0.58084	0.84196	0.60749
Cp.1047	Negative	523.292	12.352	0.63834	0.35784	0.70089	0.23568	0.95668	0.71449	0.75373	0.313
Cp.1048	Negative	376.191	11.879	0.57183	0.022202	0.79209	0.23021	0.706	0.1734	0.95478	0.93076
Cp.1049	Negative	302.136	7.71	0.52338	0.26799	0.97213	0.47049	0.70104	0.27792	0.43013	0.20308
Cp.105	Negative	298.043	3.657	1.2732	0.28635	1.0192	0.63476	1.4279	0.79941	0.88773	0.55703
Cp.1050	Negative	602.395	12.244	4.9374	5.3326e-07	2.1258	0.0033651	1.8925	0.029957	2.0263	0.0079927
Cp.1051	Negative	202.156	8.987	0.10964	0.015009	0.54957	0.25652	0.44955	0.24415	0.63938	0.36693
Cp.1052	Negative	202.131	1.828	0.71461	0.47708	1.2806	0.067192	1.0191	0.91564	1.1654	0.46937
Cp.1053	Negative	370.958	2.108	1.793	0.8467	2.869	0.0016158	2.8771	0.03574	2.9107	0.035625
Cp.1054	Negative	324.178	4.524	1.3296	0.16529	2.3043	0.0043389	2.0588	0.51228	2.0924	0.26891
Cp.1055	Negative	302.008	4.873	0.68593	0.3586	0.78795	0.42549	1.1536	0.23921	1.4578	0.60328
Cp.1056	Negative	462.01	2.707	1.6286	0.072117	1.4464	0.11006	1.7866	0.14726	1.4723	0.32865
Cp.1057	Negative	446.138	3.986	1.312	0.62522	0.80282	0.66077	0.72987	0.77463	0.50977	0.586
Cp.1058	Negative	1432.97	5.363	0.96689	0.61991	0.92521	0.19191	0.92477	0.14688	0.99848	0.97254
Cp.1059	Negative	558.252	4.92	553.36	0.099862	6668.8	7.4975e-09	2515.5	1.3105e-09	411.15	2.5165e-07
Cp.106	Negative	356.329	12.336	1.6444	0.2576	1.6582	0.1527	0.79972	0.37016	0.99452	0.90105
Cp.1060	Negative	432.102	1.752	1.5207	0.51724	0.8774	0.4969	1.27	0.31676	1.2501	0.55075
Cp.1061	Negative	434.035	7.263	0.93309	0.68107	1.0922	0.71933	0.96658	0.91411	1.7392	0.50929
Cp.1062	Negative	332.111	3.232	1.127	0.38206	1.7193	0.021441	1.5485	0.29334	1.9021	0.13911
Cp.1063	Negative	502.328	8.23	3.3189	0.00050093	0.99033	0.77719	1.119	0.98966	2.8507	0.092389
Cp.1064	Negative	462.162	3.749	1.2483	0.38735	0.94067	0.56266	1.1901	0.83414	0.75904	0.35471
Cp.1065	Negative	610.245	7.54	2.4515	0.93452	4.7665	0.86783	4.158	0.69285	0.63545	0.25552
Cp.1066	Negative	500.371	12.566	2.754	0.98346	1.5215	0.23779	1.3446	0.41663	1.3919	0.64724
Cp.1067	Negative	600.209	8.49	1.2209	0.55242	1.428	0.87876	0.94561	0.69933	1.7269	0.38529
Cp.1068	Negative	725.244	5.006	0.9536	0.64516	1.1246	0.65567	1.2554	0.77573	1.0943	0.54169
Cp.1069	Negative	166.027	1.957	1.1127	0.71077	1.0985	0.74569	1.4526	0.47717	0.96214	0.73143
Cp.107	Negative	252.1	10.161	3.029	0.57016	1.762	0.89726	5.9803	0.074418	1.4553	0.39301
Cp.1070	Negative	246.073	3.254	2.3658	0.044886	1.7014	0.24597	1.5972	0.79066	1.0935	0.47852
Cp.1071	Negative	626.244	7.899	5.6896	0.044502	3.0727	0.3585	6.2366	0.058176	3.2164	0.26475
Cp.1072	Negative	264.084	2.727	1.776	0.91703	1.3048	0.69953	0.97398	0.71698	0.90077	0.97502
Cp.1073	Negative	155.021	2.807	1.8102	0.035478	1.8704	0.94064	2.5286	0.050278	1.5922	0.55104
Cp.1074	Negative	653.414	12.303	0.00043918	0.027722	0.00029587	7.2903e-05	0.25632	0.19401	0.0010661	0.1353
Cp.1075	Negative	323.1	4.403	1.7217	0.032211	2.9949	0.00022297	1.8989	0.19127	2.5755	0.030587
Cp.1076	Negative	316.022	5.889	0.7764	0.15591	0.80702	0.30178	1.0377	0.83341	0.79995	0.39569
Cp.1077	Negative	598.223	5.75	1.7821	0.057348	1.0153	0.78134	0.98782	0.54466	0.9433	0.67787
Cp.1078	Negative	472.101	5.45	1.3497	0.47665	0.70928	0.4593	1.1518	0.7553	1.9672	0.20881
Cp.1079	Negative	1103.62	11.324	0.14763	0.028707	0.32482	0.049967	0.37563	0.078756	0.357	0.1124
Cp.108	Negative	464.189	6.583	1.3427	0.55263	1.5626	0.41641	1.3943	0.7738	1.0252	0.88897
Cp.1080	Negative	316.065	8.428	0.22413	0.02547	0.46775	0.13335	0.48428	0.11851	0.72703	0.41788
Cp.1081	Negative	360.066	2.901	0.54244	0.041395	0.71724	0.14707	0.68046	0.1935	1.0441	0.96076
Cp.1082	Negative	562.166	6.488	2.9648	0.073648	2.0316	0.23618	1.9226	0.8681	1.9899	0.29887
Cp.1083	Negative	700.293	8.714	1.5348	0.53219	2.2172	0.080449	1.5468	0.57237	1.205	0.51095
Cp.1084	Negative	204.072	5.204	0.79886	0.21332	0.76851	0.21275	0.65756	0.10827	0.68553	0.11413
Cp.1085	Negative	174.016	5.077	1.7162	0.51736	1.6554	0.6027	1.3804	0.45595	1.0316	0.9939
Cp.1086	Negative	462.138	3.968	0.7796	0.92339	0.92533	0.70007	0.7136	0.73749	0.62902	0.85854
Cp.1087	Negative	498.23	6.92	1.126	0.77744	2.1467	0.018856	1.5535	0.40996	1.2003	0.6476
Cp.1088	Negative	573.327	9.012	2.6083	0.0014135	0.68622	0.38089	0.86336	0.72707	2.4337	0.079401
Cp.1089	Negative	578.093	4.695	1.8611	0.66734	2.0261	0.6901	2.0449	0.66766	2.822	0.4535
Cp.109	Negative	565.337	9.62299	6.1145	0.0042018	1.3518	0.63627	1.5408	0.52024	4.3058	0.0066103
Cp.1090	Negative	574.281	10.459	0.43262	0.043718	1.0771	0.85897	1.1516	0.60658	0.81569	0.37359
Cp.1091	Negative	689	7.262	0.63703	0.3995	0.90147	0.4881	0.67578	0.63345	1.6789	0.40692
Cp.1092	Negative	558.195	8.17899	1.1684	0.60514	1.5826	0.61783	0.87443	0.71435	0.75732	0.49734
Cp.1093	Negative	534.354	10.25	3.5198	0.00042326	1.2596	0.41924	1.4388	0.37021	1.5795	0.18323
Cp.1094	Negative	1019.67	11.483	0.68585	0.40596	0.30317	0.048325	0.94644	0.29372	0.57285	0.16307
Cp.1095	Negative	491.545	4.459	1.2342	0.52252	0.51015	0.91937	1.4319	0.79906	1.3827	0.57899
Cp.1096	Negative	388.277	9.934	3.432	0.62816	1.777	0.97819	1.3261	0.77092	0.33826	0.33231
Cp.1097	Negative	522.32	10.726	7.8796	0.019179	2.5694	0.22494	3.4873	0.24229	3.0222	0.56189
Cp.1098	Negative	386.122	4.106	5.9849	0.00064949	2.1801	0.19887	3.2667	0.083123	1.9335	0.084083
Cp.1099	Negative	376.051	8.703	0.47192	0.34058	0.80622	0.62267	0.49086	0.24979	1.0972	0.8659
Cp.11	Negative	456.36	11.48	0.70677	0.20093	0.5162	0.017194	0.91993	0.51879	0.76259	0.44777
Cp.110	Negative	302.006	5.113	0.56852	0.62918	0.40659	0.61066	0.6097	0.66211	1.1459	0.67817
Cp.1100	Negative	328.224	7.744	0.76147	0.22162	1.0723	0.68094	0.96432	0.74815	1.6676	0.42718
Cp.1101	Negative	596.278	11.691	1.3962	0.26711	0.8449	0.32784	0.7448	0.16988	0.88301	0.46162
Cp.1102	Negative	308.147	5.16	1.512	0.17652	1.6703	0.33589	1.4944	0.39849	1.3316	0.37984
Cp.1103	Negative	342.277	11.051	2.4256	0.20941	1.3424	0.8269	1.1025	0.45137	0.52441	0.18073
Cp.1104	Negative	798.314	4.606	0.5369	0.87863	1.7082	0.71914	1.507	0.90081	1.1073	0.92199
Cp.1105	Negative	752.49	7.071	1.5374	0.053013	3.4253	0.00034409	2.5578	0.02565	3.0135	0.046005
Cp.1106	Negative	370.087	3.321	0.72216	0.77584	1.6563	0.022753	1.1183	0.56481	1.4649	0.21299
Cp.1107	Negative	346.089	1.338	0.96905	0.87375	1.4705	0.1013	1.4694	0.41522	1.3279	0.32143
Cp.1108	Negative	556.2	5.502	1.5462	0.44371	5.0512	0.0028122	3.0163	0.16019	1.9318	0.92278
Cp.1109	Negative	234.109	5.825	0.23325	0.0033342	0.48781	0.25538	0.54468	0.19797	0.59783	0.35461
Cp.111	Negative	438.21	6.458	2.4451	0.81058	4.0005	0.30566	3.3111	0.80234	3.4722	0.76056
Cp.1110	Negative	764.309	8.293	2.0521	0.043746	2.6872	0.11715	1.6747	0.4579	1.1291	0.76598
Cp.1111	Negative	338.157	5.253	0.91271	0.71679	1.5289	0.037394	1.1406	0.80615	1.5496	0.25309
Cp.1112	Negative	504.122	3.309	0.45133	0.21965	0.84554	0.38886	0.76019	0.32211	1.8505	0.28722
Cp.1113	Negative	900.06	4.64	0.87307	0.79175	0.51237	0.95019	0.78681	0.87205	1.7891	0.56171
Cp.1114	Negative	322.163	6.03	1.5154	0.029841	1.6859	0.0034316	1.7823	0.1233	1.529	0.089215
Cp.1115	Negative	359.996	5.088	1.4488	0.48046	1.2304	0.86192	1.2196	0.66657	1.6397	0.44367
[truncated: 2,095 more rows]
