# Supplementary material
Source: Frontiers journal article supplement (https://www.frontiersin.org/articles/433407)
Supplement: Table_4.XLSX [file Table_4.XLSX]

## Sheet: DEG
Gene	Transcript Number	log2FC_24h direct contact vs. control	log2FC_24h presymbiotic interaction vs. control	GO	Best Hit (Arabidopsis)	Arabidopsis Name	Arabiopsis Putative Function
Eucgr.I01092	Eucgr.I01092.1	-0.14	0.014		AT4G34260.1	FUC95A	1,2-alpha-L-fucosidases
Eucgr.I01092	Eucgr.I01092.3	-0.14	0.014		AT4G34260.1	FUC95A	1,2-alpha-L-fucosidases
Eucgr.I01092	Eucgr.I01092.2	-0.14	0.014		AT4G34260.1	FUC95A	1,2-alpha-L-fucosidases
Eucgr.I01093	Eucgr.I01093.1	-0.6	-0.1		AT4G34260.1	FUC95A	1,2-alpha-L-fucosidases
Eucgr.I01091	Eucgr.I01091.1	-1.1	-0.048		AT4G34260.1	FUC95A	1,2-alpha-L-fucosidases
Eucgr.B02610	Eucgr.B02610.1	-0.38	-0.14	GO:0009396,GO:0005524,GO:0004329	AT1G50480.1	THFS	10-formyltetrahydrofolate synthetase
Eucgr.B02610	Eucgr.B02610.2	-0.38	-0.14	GO:0009396,GO:0005524,GO:0004329	AT1G50480.1	THFS	10-formyltetrahydrofolate synthetase
Eucgr.B02610	Eucgr.B02610.3	-0.38	-0.14	GO:0009396,GO:0005524,GO:0004329	AT1G50480.1	THFS	10-formyltetrahydrofolate synthetase
Eucgr.H04562	Eucgr.H04562.1	0.39	-0.73	GO:0055114,GO:0016491,GO:0010181	AT1G76680.2	ATOPR1,OPR1	12-oxophytodienoate reductase 1
Eucgr.I02783	Eucgr.I02783.1	-1.4	-0.24	GO:0055114,GO:0016491,GO:0010181	AT1G76680.1	ATOPR1,OPR1	12-oxophytodienoate reductase 1
Eucgr.F02955	Eucgr.F02955.1	-0.79	-0.28	GO:0055114,GO:0016491,GO:0010181	AT1G76690.1	ATOPR2,OPR2	12-oxophytodienoate reductase 2
Eucgr.C03850	Eucgr.C03850.1	0.26	0.21		AT1G10830.1	Z-ISO,Z-ISO1.1,Z-ISO1.2	15-cis-zeta-carotene isomerase
Eucgr.D00343	Eucgr.D00343.1	-0.27	-0.48	GO:0006364,GO:0070569,GO:0008152	AT5G46420.1		16S rRNA processing protein RimM family
Eucgr.L02860	Eucgr.L02860.1	3.6	-0.31		AT5G12020.1	HSP17.6II	17.6 kDa class II heat shock protein
Eucgr.C00678	Eucgr.C00678.1	3.3	-1.6		AT5G12020.1	HSP17.6II	17.6 kDa class II heat shock protein
Eucgr.C00690	Eucgr.C00690.1	2.6	-1.8		AT5G12020.1	HSP17.6II	17.6 kDa class II heat shock protein
Eucgr.C03071	Eucgr.C03071.1	2.1	-0.41		AT5G12020.1	HSP17.6II	17.6 kDa class II heat shock protein
Eucgr.C00684	Eucgr.C00684.1	2	-2.1		AT5G12020.1	HSP17.6II	17.6 kDa class II heat shock protein
Eucgr.G02421	Eucgr.G02421.1	0.45	-0.01		AT2G03810.2		18S pre-ribosomal assembly protein gar2-related
Eucgr.B03118	Eucgr.B03118.1	0.15	-0.11		AT2G03810.4		18S pre-ribosomal assembly protein gar2-related
Eucgr.K00141	Eucgr.K00141.1	0.094	0.62	GO:0030170,GO:0009058	AT5G51690.1	ACS12	1-amino-cyclopropane-1-carboxylate synthase 12
Eucgr.K00141	Eucgr.K00141.2	0.094	0.62	GO:0030170,GO:0009058	AT5G51690.1	ACS12	1-amino-cyclopropane-1-carboxylate synthase 12
Eucgr.K00141	Eucgr.K00141.3	0.094	0.62	GO:0030170,GO:0009058	AT5G51690.1	ACS12	1-amino-cyclopropane-1-carboxylate synthase 12
Eucgr.C00954	Eucgr.C00954.1	-0.91	-0.46	GO:0030170,GO:0009058	AT4G26200.1	ACS7,ATACS7	1-amino-cyclopropane-1-carboxylate synthase 7
Eucgr.F02211	Eucgr.F02211.1	2.4	-5.7	GO:0030170,GO:0009058	AT4G37770.1	ACS8	1-amino-cyclopropane-1-carboxylate synthase 8
Eucgr.G02036	Eucgr.G02036.1	2.9	-2.9	GO:0055114,GO:0051920,GO:0016491	AT1G48130.1	ATPER1,PER1	1-cysteine peroxiredoxin 1
Eucgr.B00316	Eucgr.B00316.1	0.13	-0.12	GO:0005515,GO:0070402,GO:0055114,GO:0046872,GO:0030604,GO:0008299	AT5G62790.1	DXR,PDE129	1-deoxy-D-xylulose 5-phosphate reductoisomerase
Eucgr.C01793	Eucgr.C01793.2	0.19	0.23	GO:0016114,GO:0008661	AT5G11380.1	DXPS3	1-deoxy-D-xylulose 5-phosphate synthase 3
Eucgr.C01793	Eucgr.C01793.1	0.19	0.23	GO:0008152,GO:0003824,GO:0016114,GO:0008661	AT5G11380.1	DXPS3	1-deoxy-D-xylulose 5-phosphate synthase 3
Eucgr.K00137	Eucgr.K00137.1	0.25	-0.33	GO:0051537,GO:0043231	AT5G51720.1		2 iron, 2 sulfur cluster binding
Eucgr.H04776	Eucgr.H04776.1	-0.022	-0.16	GO:0019773,GO:0006511,GO:0004175,GO:0051603,GO:0005839,GO:0004298	AT3G22110.1	PAC1	20S proteasome alpha subunit C1
Eucgr.H04776	Eucgr.H04776.2	-0.022	-0.16	GO:0019773,GO:0006511,GO:0004175,GO:0051603,GO:0005839,GO:0004298	AT3G22110.1	PAC1	20S proteasome alpha subunit C1
Eucgr.J02596	Eucgr.J02596.2	0.097	-0.041	GO:0019773,GO:0006511,GO:0004175,GO:0051603,GO:0005839,GO:0004298	AT3G14290.1	PAE2	20S proteasome alpha subunit E2
Eucgr.J02596	Eucgr.J02596.1	0.097	-0.041	GO:0019773,GO:0006511,GO:0004175,GO:0051603,GO:0005839,GO:0004298	AT3G14290.1	PAE2	20S proteasome alpha subunit E2
Eucgr.B03771	Eucgr.B03771.2	0.11	-0.058	GO:0019773,GO:0006511,GO:0004175,GO:0051603,GO:0005839,GO:0004298	AT2G27020.1	PAG1	20S proteasome alpha subunit G1
Eucgr.B03771	Eucgr.B03771.1	0.11	-0.058	GO:0019773,GO:0006511,GO:0004175,GO:0051603,GO:0005839,GO:0004298	AT2G27020.1	PAG1	20S proteasome alpha subunit G1
Eucgr.D00194	Eucgr.D00194.1	0.43	0.025	GO:0051603,GO:0005839,GO:0004298	AT3G22630.1	PBD1,PRCGB	20S proteasome beta subunit D1
Eucgr.D00194	Eucgr.D00194.2	0.43	0.025	GO:0051603,GO:0005839,GO:0004298	AT3G22630.1	PBD1,PRCGB	20S proteasome beta subunit D1
Eucgr.H03435	Eucgr.H03435.1	0.14	0.072	GO:0051603,GO:0005839,GO:0004298	AT3G22630.1	PBD1,PRCGB	20S proteasome beta subunit D1
Eucgr.H02300	Eucgr.H02300.1	1.2	-2	GO:0051603,GO:0005839,GO:0004298	AT1G56450.1	PBG1	20S proteasome beta subunit G1
Eucgr.L01661	Eucgr.L01661.1	0.42	-0.22	GO:0051603,GO:0005839,GO:0004298	AT1G56450.1	PBG1	20S proteasome beta subunit G1
Eucgr.H01253	Eucgr.H01253.1	0.26	-0.089	GO:0051603,GO:0005839,GO:0004298	AT1G56450.1	PBG1	20S proteasome beta subunit G1
Eucgr.H02302	Eucgr.H02302.1	0.16	-2.3	GO:0051603,GO:0005839,GO:0004298	AT1G56450.1	PBG1	20S proteasome beta subunit G1
Eucgr.I01719	Eucgr.I01719.2	0.59	-0.068	GO:0051603,GO:0005839,GO:0004298	AT5G40580.2	PBB2	20S proteasome beta subunit PBB2
Eucgr.I01719	Eucgr.I01719.1	0.59	-0.068	GO:0051603,GO:0005839,GO:0004298	AT5G40580.2	PBB2	20S proteasome beta subunit PBB2
Eucgr.J02263	Eucgr.J02263.1	-0.16	-0.25	GO:0051603,GO:0005839,GO:0004298	AT5G40580.1	PBB2	20S proteasome beta subunit PBB2
Eucgr.F04398	Eucgr.F04398.1	0.016	-0.16	GO:0019773,GO:0006511,GO:0004175,GO:0051603,GO:0005839,GO:0004298	AT2G05840.1	PAA2	20S proteasome subunit PAA2
Eucgr.H00058	Eucgr.H00058.1	-0.19	-0.26		AT2G32730.1		26S proteasome regulatory complex, non-ATPase subcomplex, Rpn2/Psmd1 subunit
Eucgr.K01053	Eucgr.K01053.1	0.21	-0.092		AT2G20580.1	ATRPN1A,RPN1A	26S proteasome regulatory subunit S2 1A
Eucgr.K01053	Eucgr.K01053.2	0.21	-0.092		AT2G20580.1	ATRPN1A,RPN1A	26S proteasome regulatory subunit S2 1A
Eucgr.C02542	Eucgr.C02542.2	0.35	-0.023	GO:0005515	AT5G57950.1		26S proteasome regulatory subunit, putative
Eucgr.C02542	Eucgr.C02542.1	0.35	-0.023	GO:0005515	AT5G57950.1		26S proteasome regulatory subunit, putative
Eucgr.C02492	Eucgr.C02492.1	-2.2	-2.2	GO:0005515	AT5G57950.1		26S proteasome regulatory subunit, putative
Eucgr.C02492	Eucgr.C02492.2	-2.2	-2.2	GO:0005515	AT5G57950.1		26S proteasome regulatory subunit, putative
Eucgr.C01311	Eucgr.C01311.1	1	0.95		AT5G09900.3	EMB2107,MSA,RPN5A	26S proteasome regulatory subunit, putative (RPN5)
Eucgr.C01328	Eucgr.C01328.1	0.43	0.097		AT5G09900.1	EMB2107,MSA,RPN5A	26S proteasome regulatory subunit, putative (RPN5)
Eucgr.C01514	Eucgr.C01514.1	-0.22	-0.12	GO:0005515	AT5G09900.1	EMB2107,MSA,RPN5A	26S proteasome regulatory subunit, putative (RPN5)
Eucgr.C01514	Eucgr.C01514.2	-0.22	-0.12	GO:0005515	AT5G09900.2	EMB2107,MSA,RPN5A	26S proteasome regulatory subunit, putative (RPN5)
Eucgr.E00211	Eucgr.E00211.1	0.44	-0.027	GO:0005515	AT3G61140.1	ATFUS6,ATSK31,COP11,CSN1,EMB78,FUS6,SK31	26S proteasome, regulatory subunit Rpn7;Proteasome component (PCI) domain
Eucgr.I00301	Eucgr.I00301.1	-0.084	-0.18	GO:0005515	AT4G24820.2		26S proteasome, regulatory subunit Rpn7;Proteasome component (PCI) domain
Eucgr.I00301	Eucgr.I00301.3	-0.084	-0.18	GO:0005515	AT4G24820.1		26S proteasome, regulatory subunit Rpn7;Proteasome component (PCI) domain
Eucgr.I00301	Eucgr.I00301.2	-0.084	-0.18	GO:0005515	AT4G24820.1		26S proteasome, regulatory subunit Rpn7;Proteasome component (PCI) domain
Eucgr.K02756	Eucgr.K02756.1	-0.87	-0.21	GO:0005515	AT4G24820.1		26S proteasome, regulatory subunit Rpn7;Proteasome component (PCI) domain
Eucgr.A01454	Eucgr.A01454.2	0.48	-0.11	GO:0009966	AT5G53000.1	TAP46	2A phosphatase associated protein of 46 kD
Eucgr.A01454	Eucgr.A01454.1	0.48	-0.11	GO:0009966	AT5G53000.1	TAP46	2A phosphatase associated protein of 46 kD
Eucgr.C02852	Eucgr.C02852.1	0.31	0.6	GO:0051536,GO:0009055	AT4G32590.1		2Fe-2S ferredoxin-like superfamily protein
Eucgr.C02856	Eucgr.C02856.1	0.29	0.049	GO:0051536,GO:0009055	AT4G32590.1		2Fe-2S ferredoxin-like superfamily protein
Eucgr.C02856	Eucgr.C02856.2	0.29	0.049		AT4G32590.2		2Fe-2S ferredoxin-like superfamily protein
Eucgr.C02841	Eucgr.C02841.2	0.085	-0.037	GO:0051536,GO:0009055	AT4G32590.1		2Fe-2S ferredoxin-like superfamily protein
Eucgr.C02841	Eucgr.C02841.1	0.085	-0.037	GO:0051536,GO:0009055	AT4G32590.1		2Fe-2S ferredoxin-like superfamily protein
Eucgr.E00291	Eucgr.E00291.1	-0.056	-0.16	GO:0051536,GO:0009055	AT1G32550.1		2Fe-2S ferredoxin-like superfamily protein
Eucgr.L02133	Eucgr.L02133.1	-0.22	0.018	GO:0051536,GO:0009055	AT4G32590.1		2Fe-2S ferredoxin-like superfamily protein
Eucgr.C02845	Eucgr.C02845.1	-0.25	3.1	GO:0051536,GO:0009055	AT4G32590.1		2Fe-2S ferredoxin-like superfamily protein
Eucgr.I02744	Eucgr.I02744.1	-0.98	-0.92	GO:0051536,GO:0009055	AT1G60950.1	ATFD2,FED A	2Fe-2S ferredoxin-like superfamily protein
Eucgr.A00248	Eucgr.A00248.1	2.8	1.7	GO:0009098,GO:0003852,GO:0003824	AT1G74040.1	IMS1,IPMS2,MAML-3	2-isopropylmalate synthase 1
Eucgr.A00246	Eucgr.A00246.1	1.1	-0.35	GO:0009098,GO:0003852,GO:0003824	AT1G74040.1	IMS1,IPMS2,MAML-3	2-isopropylmalate synthase 1
Eucgr.A00014	Eucgr.A00014.1	0.08	-0.47	GO:0009098,GO:0003852	AT1G74040.1	IMS1,IPMS2,MAML-3	2-isopropylmalate synthase 1
Eucgr.A00249	Eucgr.A00249.1	0.056	0.3	GO:0009098,GO:0003852,GO:0003824	AT1G74040.1	IMS1,IPMS2,MAML-3	2-isopropylmalate synthase 1
Eucgr.L01927	Eucgr.L01927.1	-0.81	-0.44	GO:0003824,GO:0009098,GO:0003852	AT1G74040.1	IMS1,IPMS2,MAML-3	2-isopropylmalate synthase 1
Eucgr.A00052	Eucgr.A00052.1	-1.3	-1	GO:0009098,GO:0003852,GO:0003824	AT1G74040.1	IMS1,IPMS2,MAML-3	2-isopropylmalate synthase 1
Eucgr.F04134	Eucgr.F04134.1	0.45	0.00065	GO:0016746,GO:0008152	AT1G34430.1	EMB3003	2-oxoacid dehydrogenases acyltransferase family protein
Eucgr.G02332	Eucgr.G02332.1	0.45	0.14	GO:0016746,GO:0008152	AT3G25860.1	LTA2,PLE2	2-oxoacid dehydrogenases acyltransferase family protein
Eucgr.H03953	Eucgr.H03953.1	0.045	-0.17	GO:0016746,GO:0008152	AT3G06850.1	BCE2,DIN3,LTA1	2-oxoacid dehydrogenases acyltransferase family protein
Eucgr.L03768	Eucgr.L03768.1	-0.14	-0.21	GO:0016746,GO:0008152	AT1G34430.1	EMB3003	2-oxoacid dehydrogenases acyltransferase family protein
Eucgr.I01194	Eucgr.I01194.1	10	0	GO:0055114,GO:0016491	AT3G19000.1		2-oxoglutarate (2OG) and Fe(II)-dependent oxygenase superfamily protein
Eucgr.C03724	Eucgr.C03724.1	7.6	0	GO:0055114,GO:0016491	AT1G52820.1		2-oxoglutarate (2OG) and Fe(II)-dependent oxygenase superfamily protein
Eucgr.C01023	Eucgr.C01023.1	7.4	0	GO:0055114,GO:0016491	AT4G25310.1		2-oxoglutarate (2OG) and Fe(II)-dependent oxygenase superfamily protein
Eucgr.G00923	Eucgr.G00923.1	0	7.9	GO:0055114,GO:0016491	AT4G10490.1		2-oxoglutarate (2OG) and Fe(II)-dependent oxygenase superfamily protein
Eucgr.H02028	Eucgr.H02028.1	6.3	4.3		AT1G52790.1		2-oxoglutarate (2OG) and Fe(II)-dependent oxygenase superfamily protein
Eucgr.L00783	Eucgr.L00783.1	5.7	0.89	GO:0055114,GO:0016491	AT4G10490.1		2-oxoglutarate (2OG) and Fe(II)-dependent oxygenase superfamily protein
Eucgr.D01645	Eucgr.D01645.1	5.4	2.5		AT4G10490.1		2-oxoglutarate (2OG) and Fe(II)-dependent oxygenase superfamily protein
Eucgr.C01089	Eucgr.C01089.1	4.7	2.1		AT1G52800.1		2-oxoglutarate (2OG) and Fe(II)-dependent oxygenase superfamily protein
Eucgr.J01036	Eucgr.J01036.2	4.7	1.1	GO:0055114,GO:0016491	AT2G36690.1		2-oxoglutarate (2OG) and Fe(II)-dependent oxygenase superfamily protein
Eucgr.J01036	Eucgr.J01036.1	4.7	1.1	GO:0055114,GO:0016491	AT2G36690.1		2-oxoglutarate (2OG) and Fe(II)-dependent oxygenase superfamily protein
Eucgr.L00786	Eucgr.L00786.1	4.7	0	GO:0055114,GO:0016491	AT4G10490.1		2-oxoglutarate (2OG) and Fe(II)-dependent oxygenase superfamily protein
Eucgr.K02978	Eucgr.K02978.1	4.3	0.53	GO:0055114,GO:0016491	AT3G11180.1		2-oxoglutarate (2OG) and Fe(II)-dependent oxygenase superfamily protein
Eucgr.L00353	Eucgr.L00353.1	4	0.5	GO:0055114,GO:0016491	AT4G10490.1		2-oxoglutarate (2OG) and Fe(II)-dependent oxygenase superfamily protein
Eucgr.H02600	Eucgr.H02600.1	3.9	0.67	GO:0055114,GO:0016491	AT5G20400.1		2-oxoglutarate (2OG) and Fe(II)-dependent oxygenase superfamily protein
Eucgr.L02991	Eucgr.L02991.1	3.8	-3.3	GO:0055114,GO:0016491	AT4G10490.1		2-oxoglutarate (2OG) and Fe(II)-dependent oxygenase superfamily protein
Eucgr.C01090	Eucgr.C01090.1	3.7	1.7	GO:0055114,GO:0016491	AT1G52820.1		2-oxoglutarate (2OG) and Fe(II)-dependent oxygenase superfamily protein
Eucgr.A00518	Eucgr.A00518.1	3.2	1.1	GO:0055114,GO:0016491	AT5G05600.1		2-oxoglutarate (2OG) and Fe(II)-dependent oxygenase superfamily protein
Eucgr.C01093	Eucgr.C01093.1	3.2	-2	GO:0055114,GO:0016491	AT1G52820.1		2-oxoglutarate (2OG) and Fe(II)-dependent oxygenase superfamily protein
Eucgr.J00951	Eucgr.J00951.1	3.2	1.1	GO:0055114,GO:0016491	AT1G52800.1		2-oxoglutarate (2OG) and Fe(II)-dependent oxygenase superfamily protein
Eucgr.F02563	Eucgr.F02563.1	2.8	3.1	GO:0055114,GO:0016491	AT1G52800.1		2-oxoglutarate (2OG) and Fe(II)-dependent oxygenase superfamily protein
Eucgr.L00350	Eucgr.L00350.2	2.8	-0.69	GO:0055114,GO:0016491	AT4G10490.1		2-oxoglutarate (2OG) and Fe(II)-dependent oxygenase superfamily protein
Eucgr.L00350	Eucgr.L00350.1	2.8	-0.69	GO:0055114,GO:0016491	AT4G10490.1		2-oxoglutarate (2OG) and Fe(II)-dependent oxygenase superfamily protein
Eucgr.G02952	Eucgr.G02952.1	2.7	0.21		AT1G17010.1		2-oxoglutarate (2OG) and Fe(II)-dependent oxygenase superfamily protein
Eucgr.A02644	Eucgr.A02644.1	2.6	2.9	GO:0055114,GO:0016491	AT1G06620.1		2-oxoglutarate (2OG) and Fe(II)-dependent oxygenase superfamily protein
Eucgr.F01241	Eucgr.F01241.1	2.5	-2.8	GO:0055114,GO:0016491	AT1G52820.1		2-oxoglutarate (2OG) and Fe(II)-dependent oxygenase superfamily protein
Eucgr.C04394	Eucgr.C04394.1	2.4	2.4	GO:0055114,GO:0016491	AT5G20400.1		2-oxoglutarate (2OG) and Fe(II)-dependent oxygenase superfamily protein
Eucgr.H03122	Eucgr.H03122.1	2.4	2.9	GO:0055114,GO:0016491	AT1G06650.2		2-oxoglutarate (2OG) and Fe(II)-dependent oxygenase superfamily protein
Eucgr.C04146	Eucgr.C04146.1	2.3	2.7	GO:0055114,GO:0016491	AT1G52820.1		2-oxoglutarate (2OG) and Fe(II)-dependent oxygenase superfamily protein
Eucgr.C01091	Eucgr.C01091.1	2.2	1.2		AT1G52800.1		2-oxoglutarate (2OG) and Fe(II)-dependent oxygenase superfamily protein
Eucgr.C01285	Eucgr.C01285.1	2.2	-4.6	GO:0055114,GO:0016491	AT4G25300.1		2-oxoglutarate (2OG) and Fe(II)-dependent oxygenase superfamily protein
Eucgr.C01027	Eucgr.C01027.1	2.1	-1.9	GO:0055114,GO:0016491	AT4G25300.1		2-oxoglutarate (2OG) and Fe(II)-dependent oxygenase superfamily protein
Eucgr.E02889	Eucgr.E02889.1	2.1	1.1		AT4G25310.1		2-oxoglutarate (2OG) and Fe(II)-dependent oxygenase superfamily protein
Eucgr.I02177	Eucgr.I02177.1	2.1	1.1	GO:0055114,GO:0016491	AT1G14130.1		2-oxoglutarate (2OG) and Fe(II)-dependent oxygenase superfamily protein
Eucgr.L00788	Eucgr.L00788.1	1.9	0.58	GO:0055114,GO:0016491	AT4G10490.1		2-oxoglutarate (2OG) and Fe(II)-dependent oxygenase superfamily protein
Eucgr.I01203	Eucgr.I01203.1	1.6	-1.1	GO:0055114,GO:0016491	AT3G19000.1		2-oxoglutarate (2OG) and Fe(II)-dependent oxygenase superfamily protein
Eucgr.A02646	Eucgr.A02646.1	1.4	1.3	GO:0055114,GO:0016491	AT1G06620.1		2-oxoglutarate (2OG) and Fe(II)-dependent oxygenase superfamily protein
Eucgr.B02667	Eucgr.B02667.1	1.3	-1.8	GO:0055114,GO:0016491	AT1G03410.1	2A6	2-oxoglutarate (2OG) and Fe(II)-dependent oxygenase superfamily protein
Eucgr.C01002	Eucgr.C01002.2	1.3	0.38	GO:0055114,GO:0016491	AT1G35190.1		2-oxoglutarate (2OG) and Fe(II)-dependent oxygenase superfamily protein
Eucgr.C01002	Eucgr.C01002.1	1.3	0.38	GO:0055114,GO:0016491	AT1G35190.1		2-oxoglutarate (2OG) and Fe(II)-dependent oxygenase superfamily protein
Eucgr.C01002	Eucgr.C01002.3	1.3	0.38	GO:0055114,GO:0016491	AT1G35190.1		2-oxoglutarate (2OG) and Fe(II)-dependent oxygenase superfamily protein
Eucgr.J00197	Eucgr.J00197.1	1.2	0.11		AT3G11150.1		2-oxoglutarate (2OG) and Fe(II)-dependent oxygenase superfamily protein
Eucgr.K00447	Eucgr.K00447.1	1.2	1.3	GO:0055114,GO:0016491	AT5G24530.1	DMR6	2-oxoglutarate (2OG) and Fe(II)-dependent oxygenase superfamily protein
Eucgr.J01257	Eucgr.J01257.1	1.1	-0.18		AT5G48020.1		2-oxoglutarate (2OG) and Fe(II)-dependent oxygenase superfamily protein
Eucgr.K03324	Eucgr.K03324.3	1.1	0.1		AT5G19840.1		2-oxoglutarate (2OG) and Fe(II)-dependent oxygenase superfamily protein
Eucgr.K03324	Eucgr.K03324.1	1.1	0.1		AT5G19840.1		2-oxoglutarate (2OG) and Fe(II)-dependent oxygenase superfamily protein
Eucgr.K03324	Eucgr.K03324.4	1.1	0.1		AT5G19840.1		2-oxoglutarate (2OG) and Fe(II)-dependent oxygenase superfamily protein
Eucgr.K03324	Eucgr.K03324.2	1.1	0.1		AT5G19840.1		2-oxoglutarate (2OG) and Fe(II)-dependent oxygenase superfamily protein
Eucgr.C03743	Eucgr.C03743.1	1	0.22		AT3G46490.1		2-oxoglutarate (2OG) and Fe(II)-dependent oxygenase superfamily protein
Eucgr.J00814	Eucgr.J00814.2	1	0.4		AT3G20810.1		2-oxoglutarate (2OG) and Fe(II)-dependent oxygenase superfamily protein
Eucgr.J00814	Eucgr.J00814.1	1	0.4		AT3G20810.1		2-oxoglutarate (2OG) and Fe(II)-dependent oxygenase superfamily protein
Eucgr.L01351	Eucgr.L01351.1	1	-4.2	GO:0055114,GO:0016491	AT1G52790.1		2-oxoglutarate (2OG) and Fe(II)-dependent oxygenase superfamily protein
Eucgr.I01197	Eucgr.I01197.1	0.9	-0.95	GO:0055114,GO:0016491	AT3G19000.1		2-oxoglutarate (2OG) and Fe(II)-dependent oxygenase superfamily protein
Eucgr.H03119	Eucgr.H03119.1	0.89	1	GO:0055114,GO:0016491	AT1G06650.2		2-oxoglutarate (2OG) and Fe(II)-dependent oxygenase superfamily protein
Eucgr.C03734	Eucgr.C03734.1	0.88	0.47	GO:0055114,GO:0016491	AT3G46500.1		2-oxoglutarate (2OG) and Fe(II)-dependent oxygenase superfamily protein
Eucgr.C03734	Eucgr.C03734.2	0.88	0.47	GO:0055114,GO:0016491	AT3G46500.1		2-oxoglutarate (2OG) and Fe(II)-dependent oxygenase superfamily protein
Eucgr.B02658	Eucgr.B02658.1	0.78	0.67		AT1G68080.1		2-oxoglutarate (2OG) and Fe(II)-dependent oxygenase superfamily protein
Eucgr.C04135	Eucgr.C04135.1	0.78	0.13		AT4G13400.1		2-oxoglutarate (2OG) and Fe(II)-dependent oxygenase superfamily protein
Eucgr.I00885	Eucgr.I00885.1	0.73	0.41	GO:0055114,GO:0016491	AT3G50210.1		2-oxoglutarate (2OG) and Fe(II)-dependent oxygenase superfamily protein
Eucgr.K00039	Eucgr.K00039.1	0.72	-2.4	GO:0055114,GO:0016491	AT5G24530.1	DMR6	2-oxoglutarate (2OG) and Fe(II)-dependent oxygenase superfamily protein
Eucgr.I00722	Eucgr.I00722.1	0.71	0.57	GO:0055114,GO:0016491	AT4G33910.1		2-oxoglutarate (2OG) and Fe(II)-dependent oxygenase superfamily protein
Eucgr.J02579	Eucgr.J02579.1	0.7	-0.46	GO:0055114,GO:0016491	AT1G14130.1		2-oxoglutarate (2OG) and Fe(II)-dependent oxygenase superfamily protein
Eucgr.G00952	Eucgr.G00952.1	0.66	0.27	GO:0055114,GO:0016491	AT2G36690.1		2-oxoglutarate (2OG) and Fe(II)-dependent oxygenase superfamily protein
Eucgr.C04393	Eucgr.C04393.1	0.59	0.41	GO:0055114,GO:0016491	AT1G49390.1		2-oxoglutarate (2OG) and Fe(II)-dependent oxygenase superfamily protein
Eucgr.H01159	Eucgr.H01159.1	0.58	0.13		AT4G02485.1		2-oxoglutarate (2OG) and Fe(II)-dependent oxygenase superfamily protein
Eucgr.A00890	Eucgr.A00890.2	0.57	0.78	GO:0055114,GO:0016491	AT1G06650.2		2-oxoglutarate (2OG) and Fe(II)-dependent oxygenase superfamily protein
Eucgr.A00890	Eucgr.A00890.1	0.57	0.78	GO:0055114,GO:0016491	AT1G06650.2		2-oxoglutarate (2OG) and Fe(II)-dependent oxygenase superfamily protein
Eucgr.C01029	Eucgr.C01029.1	0.55	-3.4	GO:0055114,GO:0016491	AT4G25300.1		2-oxoglutarate (2OG) and Fe(II)-dependent oxygenase superfamily protein
Eucgr.B02862	Eucgr.B02862.2	0.54	0.13		AT3G18210.2		2-oxoglutarate (2OG) and Fe(II)-dependent oxygenase superfamily protein
Eucgr.B02862	Eucgr.B02862.3	0.54	0.13		AT3G18210.1		2-oxoglutarate (2OG) and Fe(II)-dependent oxygenase superfamily protein
Eucgr.B02862	Eucgr.B02862.1	0.54	0.13		AT3G18210.2		2-oxoglutarate (2OG) and Fe(II)-dependent oxygenase superfamily protein
Eucgr.K00448	Eucgr.K00448.1	0.53	0.5	GO:0055114,GO:0016491	AT5G24530.1	DMR6	2-oxoglutarate (2OG) and Fe(II)-dependent oxygenase superfamily protein
Eucgr.C03757	Eucgr.C03757.1	0.48	0.46	GO:0055114,GO:0016491	AT1G35190.1		2-oxoglutarate (2OG) and Fe(II)-dependent oxygenase superfamily protein
Eucgr.C03757	Eucgr.C03757.2	0.48	0.46	GO:0055114,GO:0016491	AT1G35190.1		2-oxoglutarate (2OG) and Fe(II)-dependent oxygenase superfamily protein
Eucgr.C03757	Eucgr.C03757.4	0.48	0.46		AT1G35190.1		2-oxoglutarate (2OG) and Fe(II)-dependent oxygenase superfamily protein
Eucgr.C03757	Eucgr.C03757.3	0.48	0.46	GO:0055114,GO:0016491	AT1G35190.1		2-oxoglutarate (2OG) and Fe(II)-dependent oxygenase superfamily protein
Eucgr.A02845	Eucgr.A02845.1	0.45	0.22		AT5G51880.1		2-oxoglutarate (2OG) and Fe(II)-dependent oxygenase superfamily protein
Eucgr.A02845	Eucgr.A02845.2	0.45	0.22		AT5G51880.1		2-oxoglutarate (2OG) and Fe(II)-dependent oxygenase superfamily protein
Eucgr.H03101	Eucgr.H03101.1	0.45	0.14	GO:0055114,GO:0016491	AT1G06620.1		2-oxoglutarate (2OG) and Fe(II)-dependent oxygenase superfamily protein
Eucgr.L03759	Eucgr.L03759.1	0.45	0.4		AT1G35190.1		2-oxoglutarate (2OG) and Fe(II)-dependent oxygenase superfamily protein
Eucgr.F01696	Eucgr.F01696.4	0.44	-0.091		AT1G20270.1		2-oxoglutarate (2OG) and Fe(II)-dependent oxygenase superfamily protein
Eucgr.F01696	Eucgr.F01696.1	0.44	-0.091	GO:0055114,GO:0016491	AT1G20270.1		2-oxoglutarate (2OG) and Fe(II)-dependent oxygenase superfamily protein
Eucgr.F01696	Eucgr.F01696.3	0.44	-0.091	GO:0055114,GO:0016491	AT1G20270.1		2-oxoglutarate (2OG) and Fe(II)-dependent oxygenase superfamily protein
Eucgr.F01696	Eucgr.F01696.2	0.44	-0.091	GO:0055114,GO:0016491	AT1G20270.1		2-oxoglutarate (2OG) and Fe(II)-dependent oxygenase superfamily protein
Eucgr.K03274	Eucgr.K03274.3	0.44	0.19	GO:0055114,GO:0016491	AT1G06620.1		2-oxoglutarate (2OG) and Fe(II)-dependent oxygenase superfamily protein
Eucgr.K03274	Eucgr.K03274.4	0.44	0.19	GO:0055114,GO:0016491	AT1G06620.1		2-oxoglutarate (2OG) and Fe(II)-dependent oxygenase superfamily protein
Eucgr.K03274	Eucgr.K03274.7	0.44	0.19	GO:0055114,GO:0016491	AT1G06620.1		2-oxoglutarate (2OG) and Fe(II)-dependent oxygenase superfamily protein
Eucgr.K03274	Eucgr.K03274.2	0.44	0.19	GO:0055114,GO:0016491	AT1G06620.1		2-oxoglutarate (2OG) and Fe(II)-dependent oxygenase superfamily protein
Eucgr.K03274	Eucgr.K03274.1	0.44	0.19	GO:0055114,GO:0016491	AT1G06620.1		2-oxoglutarate (2OG) and Fe(II)-dependent oxygenase superfamily protein
Eucgr.K03274	Eucgr.K03274.5	0.44	0.19	GO:0055114,GO:0016491	AT1G06620.1		2-oxoglutarate (2OG) and Fe(II)-dependent oxygenase superfamily protein
Eucgr.K03274	Eucgr.K03274.6	0.44	0.19	GO:0055114,GO:0016491	AT1G06620.1		2-oxoglutarate (2OG) and Fe(II)-dependent oxygenase superfamily protein
Eucgr.K03273	Eucgr.K03273.1	0.42	-0.15	GO:0055114,GO:0016491	AT1G06620.1		2-oxoglutarate (2OG) and Fe(II)-dependent oxygenase superfamily protein
Eucgr.E02883	Eucgr.E02883.1	0.41	0.64	GO:0055114,GO:0016491	AT1G17010.1		2-oxoglutarate (2OG) and Fe(II)-dependent oxygenase superfamily protein
Eucgr.F01456	Eucgr.F01456.1	0.39	-0.1		AT3G12940.1		2-oxoglutarate (2OG) and Fe(II)-dependent oxygenase superfamily protein
Eucgr.B00243	Eucgr.B00243.1	0.38	0.31		AT5G63080.1		2-oxoglutarate (2OG) and Fe(II)-dependent oxygenase superfamily protein
Eucgr.B01527	Eucgr.B01527.1	0.38	0.064	GO:0055114,GO:0016491	AT4G16330.2		2-oxoglutarate (2OG) and Fe(II)-dependent oxygenase superfamily protein
Eucgr.I02306	Eucgr.I02306.1	0.38	0.0034	GO:0055114,GO:0016491	AT5G66060.1		2-oxoglutarate (2OG) and Fe(II)-dependent oxygenase superfamily protein
Eucgr.E02880	Eucgr.E02880.2	0.32	0.13	GO:0055114,GO:0016491	AT4G25300.1		2-oxoglutarate (2OG) and Fe(II)-dependent oxygenase superfamily protein
Eucgr.E02880	Eucgr.E02880.1	0.32	0.13	GO:0055114,GO:0016491	AT4G25300.1		2-oxoglutarate (2OG) and Fe(II)-dependent oxygenase superfamily protein
Eucgr.E02880	Eucgr.E02880.3	0.32	0.13	GO:0055114,GO:0016491	AT4G25310.1		2-oxoglutarate (2OG) and Fe(II)-dependent oxygenase superfamily protein
Eucgr.H03097	Eucgr.H03097.1	0.29	0.14	GO:0055114,GO:0016491	AT1G06620.1		2-oxoglutarate (2OG) and Fe(II)-dependent oxygenase superfamily protein
Eucgr.F02565	Eucgr.F02565.1	0.25	-5.8	GO:0055114,GO:0016491	AT1G52800.1		2-oxoglutarate (2OG) and Fe(II)-dependent oxygenase superfamily protein
Eucgr.H03885	Eucgr.H03885.1	0.25	0.12	GO:0055114,GO:0016491	AT3G21420.1		2-oxoglutarate (2OG) and Fe(II)-dependent oxygenase superfamily protein
Eucgr.J01254	Eucgr.J01254.1	0.22	-0.42		AT5G48020.1		2-oxoglutarate (2OG) and Fe(II)-dependent oxygenase superfamily protein
Eucgr.K03337	Eucgr.K03337.1	0.21	0.12		AT3G63290.1		2-oxoglutarate (2OG) and Fe(II)-dependent oxygenase superfamily protein
Eucgr.K02241	Eucgr.K02241.1	0.19	0.059		AT3G18210.2		2-oxoglutarate (2OG) and Fe(II)-dependent oxygenase superfamily protein
Eucgr.F03839	Eucgr.F03839.1	0.18	-0.26	GO:0055114,GO:0016491	AT1G77330.1		2-oxoglutarate (2OG) and Fe(II)-dependent oxygenase superfamily protein
Eucgr.E00403	Eucgr.E00403.1	0.15	-0.48	GO:0055114,GO:0016491	AT4G16770.1		2-oxoglutarate (2OG) and Fe(II)-dependent oxygenase superfamily protein
Eucgr.H03100	Eucgr.H03100.1	0.15	-0.19	GO:0055114,GO:0016491	AT1G06620.1		2-oxoglutarate (2OG) and Fe(II)-dependent oxygenase superfamily protein
Eucgr.H03653	Eucgr.H03653.2	0.1	-0.19	GO:0055114,GO:0016491	AT5G18900.1		2-oxoglutarate (2OG) and Fe(II)-dependent oxygenase superfamily protein
Eucgr.H03653	Eucgr.H03653.1	0.1	-0.19	GO:0055114,GO:0016491	AT5G18900.1		2-oxoglutarate (2OG) and Fe(II)-dependent oxygenase superfamily protein
Eucgr.L03705	Eucgr.L03705.1	0.078	-0.52		AT5G48020.1		2-oxoglutarate (2OG) and Fe(II)-dependent oxygenase superfamily protein
Eucgr.K00040	Eucgr.K00040.1	0.068	-0.34	GO:0055114,GO:0016491	AT5G24530.1	DMR6	2-oxoglutarate (2OG) and Fe(II)-dependent oxygenase superfamily protein
Eucgr.I01191	Eucgr.I01191.1	0.067	0.92	GO:0055114,GO:0016491	AT3G19000.1		2-oxoglutarate (2OG) and Fe(II)-dependent oxygenase superfamily protein
Eucgr.I01191	Eucgr.I01191.2	0.067	0.92	GO:0055114,GO:0016491	AT3G19000.1		2-oxoglutarate (2OG) and Fe(II)-dependent oxygenase superfamily protein
Eucgr.F02562	Eucgr.F02562.1	0.036	0.21	GO:0055114,GO:0016491	AT1G52800.1		2-oxoglutarate (2OG) and Fe(II)-dependent oxygenase superfamily protein
Eucgr.E01138	Eucgr.E01138.1	0.0022	0.036		AT3G45880.1		2-oxoglutarate (2OG) and Fe(II)-dependent oxygenase superfamily protein
Eucgr.I00887	Eucgr.I00887.1	0.0011	0.0061	GO:0055114,GO:0016491	AT3G50210.3		2-oxoglutarate (2OG) and Fe(II)-dependent oxygenase superfamily protein
Eucgr.I00887	Eucgr.I00887.2	0.0011	0.0061	GO:0055114,GO:0016491	AT3G50210.1		2-oxoglutarate (2OG) and Fe(II)-dependent oxygenase superfamily protein
Eucgr.I00887	Eucgr.I00887.3	0.0011	0.0061	GO:0055114,GO:0016491	AT3G50210.3		2-oxoglutarate (2OG) and Fe(II)-dependent oxygenase superfamily protein
Eucgr.I00887	Eucgr.I00887.4	0.0011	0.0061	GO:0055114,GO:0016491	AT3G50210.3		2-oxoglutarate (2OG) and Fe(II)-dependent oxygenase superfamily protein
Eucgr.I00887	Eucgr.I00887.5	0.0011	0.0061	GO:0055114,GO:0016491	AT3G50210.3		2-oxoglutarate (2OG) and Fe(II)-dependent oxygenase superfamily protein
Eucgr.B00474	Eucgr.B00474.1	0	0	GO:0055114,GO:0016491	AT1G77330.1		2-oxoglutarate (2OG) and Fe(II)-dependent oxygenase superfamily protein
Eucgr.G00917	Eucgr.G00917.1	0	7.5		AT2G36690.1		2-oxoglutarate (2OG) and Fe(II)-dependent oxygenase superfamily protein
Eucgr.G00930	Eucgr.G00930.1	-1.1	6.5	GO:0055114,GO:0016491	AT4G10490.1		2-oxoglutarate (2OG) and Fe(II)-dependent oxygenase superfamily protein
Eucgr.H03120	Eucgr.H03120.1	0	5.6	GO:0055114,GO:0016491	AT1G06620.1		2-oxoglutarate (2OG) and Fe(II)-dependent oxygenase superfamily protein
Eucgr.H03108	Eucgr.H03108.1	0	4.1	GO:0055114,GO:0016491	AT1G06620.1		2-oxoglutarate (2OG) and Fe(II)-dependent oxygenase superfamily protein
Eucgr.C00492	Eucgr.C00492.1	0	5.5	GO:0055114,GO:0016491	AT1G49390.1		2-oxoglutarate (2OG) and Fe(II)-dependent oxygenase superfamily protein
Eucgr.I01195	Eucgr.I01195.1	0	0	GO:0055114,GO:0016491	AT3G19000.1		2-oxoglutarate (2OG) and Fe(II)-dependent oxygenase superfamily protein
Eucgr.J03005	Eucgr.J03005.1	0	0	GO:0055114,GO:0016491	AT4G25300.1		2-oxoglutarate (2OG) and Fe(II)-dependent oxygenase superfamily protein
Eucgr.F03916	Eucgr.F03916.1	-0.0019	0.76	GO:0055114,GO:0016491	AT1G49390.1		2-oxoglutarate (2OG) and Fe(II)-dependent oxygenase superfamily protein
Eucgr.F03916	Eucgr.F03916.2	-0.0019	0.76	GO:0055114,GO:0016491	AT1G49390.1		2-oxoglutarate (2OG) and Fe(II)-dependent oxygenase superfamily protein
Eucgr.B00473	Eucgr.B00473.1	-0.024	0.55	GO:0055114,GO:0016491	AT3G19010.1		2-oxoglutarate (2OG) and Fe(II)-dependent oxygenase superfamily protein
Eucgr.C01317	Eucgr.C01317.1	-0.027	0.73	GO:0055114,GO:0016491	AT1G35190.1		2-oxoglutarate (2OG) and Fe(II)-dependent oxygenase superfamily protein
Eucgr.J02936	Eucgr.J02936.1	-0.029	-0.064	GO:0055114,GO:0016491	AT3G21360.1		2-oxoglutarate (2OG) and Fe(II)-dependent oxygenase superfamily protein
Eucgr.C03749	Eucgr.C03749.1	-0.036	2.3		AT1G35190.2		2-oxoglutarate (2OG) and Fe(II)-dependent oxygenase superfamily protein
Eucgr.B03062	Eucgr.B03062.1	-0.045	0.27	GO:0055114,GO:0016491	AT3G21360.1		2-oxoglutarate (2OG) and Fe(II)-dependent oxygenase superfamily protein
Eucgr.C03647	Eucgr.C03647.1	-0.06	0.32	GO:0055114,GO:0016491	AT1G35190.1		2-oxoglutarate (2OG) and Fe(II)-dependent oxygenase superfamily protein
Eucgr.I01192	Eucgr.I01192.1	-0.077	1.1	GO:0055114,GO:0016491	AT3G19000.1		2-oxoglutarate (2OG) and Fe(II)-dependent oxygenase superfamily protein
Eucgr.C01085	Eucgr.C01085.1	-0.081	-4.1		AT1G52800.1		2-oxoglutarate (2OG) and Fe(II)-dependent oxygenase superfamily protein
Eucgr.H03121	Eucgr.H03121.1	-0.088	0.19	GO:0055114,GO:0016491	AT1G06650.2		2-oxoglutarate (2OG) and Fe(II)-dependent oxygenase superfamily protein
Eucgr.E02892	Eucgr.E02892.1	-0.1	0.46	GO:0055114,GO:0016491	AT1G17010.1		2-oxoglutarate (2OG) and Fe(II)-dependent oxygenase superfamily protein
Eucgr.A02642	Eucgr.A02642.1	-0.14	-0.0016	GO:0055114,GO:0016491	AT1G04350.1		2-oxoglutarate (2OG) and Fe(II)-dependent oxygenase superfamily protein
Eucgr.J02428	Eucgr.J02428.2	-0.14	-0.19		AT2G17970.1		2-oxoglutarate (2OG) and Fe(II)-dependent oxygenase superfamily protein
Eucgr.J02428	Eucgr.J02428.1	-0.14	-0.19		AT2G17970.1		2-oxoglutarate (2OG) and Fe(II)-dependent oxygenase superfamily protein
Eucgr.J02428	Eucgr.J02428.3	-0.14	-0.19		AT2G17970.1		2-oxoglutarate (2OG) and Fe(II)-dependent oxygenase superfamily protein
Eucgr.J02489	Eucgr.J02489.2	-0.15	-0.25	GO:0055114,GO:0016491	AT5G66060.1		2-oxoglutarate (2OG) and Fe(II)-dependent oxygenase superfamily protein
Eucgr.J02489	Eucgr.J02489.1	-0.15	-0.25	GO:0055114,GO:0016491	AT5G66060.1		2-oxoglutarate (2OG) and Fe(II)-dependent oxygenase superfamily protein
Eucgr.K03271	Eucgr.K03271.1	-0.18	0.024	GO:0055114,GO:0016491	AT1G06620.1		2-oxoglutarate (2OG) and Fe(II)-dependent oxygenase superfamily protein
Eucgr.G00953	Eucgr.G00953.1	-0.2	0.16	GO:0055114,GO:0016491	AT2G36690.1		2-oxoglutarate (2OG) and Fe(II)-dependent oxygenase superfamily protein
Eucgr.G00955	Eucgr.G00955.1	-0.2	-2	GO:0055114,GO:0016491	AT4G10490.1		2-oxoglutarate (2OG) and Fe(II)-dependent oxygenase superfamily protein
Eucgr.F03837	Eucgr.F03837.1	-0.24	-0.48		AT1G77330.1		2-oxoglutarate (2OG) and Fe(II)-dependent oxygenase superfamily protein
Eucgr.E00625	Eucgr.E00625.1	-0.28	-0.58	GO:0055114,GO:0016491	AT4G23340.1		2-oxoglutarate (2OG) and Fe(II)-dependent oxygenase superfamily protein
Eucgr.H03109	Eucgr.H03109.1	-0.31	0.45	GO:0055114,GO:0016491	AT1G06650.2		2-oxoglutarate (2OG) and Fe(II)-dependent oxygenase superfamily protein
Eucgr.G00956	Eucgr.G00956.1	-0.34	-1.8		AT2G44800.1		2-oxoglutarate (2OG) and Fe(II)-dependent oxygenase superfamily protein
Eucgr.C01476	Eucgr.C01476.1	-0.35	1.1	GO:0055114,GO:0016491	AT1G35190.1		2-oxoglutarate (2OG) and Fe(II)-dependent oxygenase superfamily protein
Eucgr.C01086	Eucgr.C01086.1	-0.39	-2.2	GO:0055114,GO:0016491	AT1G52820.1		2-oxoglutarate (2OG) and Fe(II)-dependent oxygenase superfamily protein
Eucgr.C03738	Eucgr.C03738.1	-0.41	0.79		AT3G46490.1		2-oxoglutarate (2OG) and Fe(II)-dependent oxygenase superfamily protein
Eucgr.I01206	Eucgr.I01206.1	-0.43	-0.083	GO:0055114,GO:0016491	AT3G19000.1		2-oxoglutarate (2OG) and Fe(II)-dependent oxygenase superfamily protein
Eucgr.G03066	Eucgr.G03066.1	-0.51	-0.095	GO:0055114,GO:0016491	AT5G05600.1		2-oxoglutarate (2OG) and Fe(II)-dependent oxygenase superfamily protein
Eucgr.B02243	Eucgr.B02243.1	-0.52	0.51	GO:0055114,GO:0016491	AT5G58660.1		2-oxoglutarate (2OG) and Fe(II)-dependent oxygenase superfamily protein
Eucgr.H03103	Eucgr.H03103.1	-0.59	0.25	GO:0055114,GO:0016491	AT1G06620.1		2-oxoglutarate (2OG) and Fe(II)-dependent oxygenase superfamily protein
Eucgr.I01189	Eucgr.I01189.1	-0.6	0.28	GO:0055114,GO:0016491	AT3G19000.1		2-oxoglutarate (2OG) and Fe(II)-dependent oxygenase superfamily protein
Eucgr.K02429	Eucgr.K02429.1	-0.68	-0.26	GO:0055114,GO:0016491	AT2G36690.1		2-oxoglutarate (2OG) and Fe(II)-dependent oxygenase superfamily protein
Eucgr.B03063	Eucgr.B03063.1	-0.72	-4.5	GO:0055114,GO:0016491	AT3G21360.1		2-oxoglutarate (2OG) and Fe(II)-dependent oxygenase superfamily protein
Eucgr.K03278	Eucgr.K03278.1	-0.73	0.16	GO:0055114,GO:0016491	AT1G06620.1		2-oxoglutarate (2OG) and Fe(II)-dependent oxygenase superfamily protein
Eucgr.J03022	Eucgr.J03022.1	-0.92	0.14	GO:0055114,GO:0016491	AT1G52790.1		2-oxoglutarate (2OG) and Fe(II)-dependent oxygenase superfamily protein
Eucgr.K03277	Eucgr.K03277.2	-0.98	0.23	GO:0055114,GO:0016491	AT1G06620.1		2-oxoglutarate (2OG) and Fe(II)-dependent oxygenase superfamily protein
Eucgr.K03277	Eucgr.K03277.1	-0.98	0.23	GO:0055114,GO:0016491	AT1G06620.1		2-oxoglutarate (2OG) and Fe(II)-dependent oxygenase superfamily protein
Eucgr.C01096	Eucgr.C01096.1	-1	-0.07	GO:0055114,GO:0016491	AT1G52820.1		2-oxoglutarate (2OG) and Fe(II)-dependent oxygenase superfamily protein
Eucgr.C01319	Eucgr.C01319.1	-1	-1.8	GO:0055114,GO:0016491	AT1G35190.1		2-oxoglutarate (2OG) and Fe(II)-dependent oxygenase superfamily protein
Eucgr.K03272	Eucgr.K03272.1	-1	0.38	GO:0055114,GO:0016491	AT1G06620.1		2-oxoglutarate (2OG) and Fe(II)-dependent oxygenase superfamily protein
Eucgr.L03346	Eucgr.L03346.1	-1	-1.8	GO:0055114,GO:0016491	AT1G35190.1		2-oxoglutarate (2OG) and Fe(II)-dependent oxygenase superfamily protein
Eucgr.H03118	Eucgr.H03118.1	6.4	5.1	GO:0055114,GO:0016491	AT1G06620.1		2-oxoglutarate (2OG) and Fe(II)-dependent oxygenase superfamily protein
Eucgr.L01228	Eucgr.L01228.1	-1.1	-0.042	GO:0055114,GO:0016491	AT2G30840.1		2-oxoglutarate (2OG) and Fe(II)-dependent oxygenase superfamily protein
Eucgr.L02728	Eucgr.L02728.1	-1.1	2.1	GO:0055114,GO:0016491	AT1G14130.1		2-oxoglutarate (2OG) and Fe(II)-dependent oxygenase superfamily protein
Eucgr.C00321	Eucgr.C00321.1	-1.2	-0.43	GO:0055114,GO:0016491	AT5G20400.1		2-oxoglutarate (2OG) and Fe(II)-dependent oxygenase superfamily protein
Eucgr.C00321	Eucgr.C00321.4	-1.2	-0.43	GO:0055114,GO:0016491	AT1G49390.1		2-oxoglutarate (2OG) and Fe(II)-dependent oxygenase superfamily protein
Eucgr.C00321	Eucgr.C00321.3	-1.2	-0.43	GO:0055114,GO:0016491	AT5G54000.1		2-oxoglutarate (2OG) and Fe(II)-dependent oxygenase superfamily protein
Eucgr.C00321	Eucgr.C00321.2	-1.2	-0.43	GO:0055114,GO:0016491	AT5G54000.1		2-oxoglutarate (2OG) and Fe(II)-dependent oxygenase superfamily protein
Eucgr.H02034	Eucgr.H02034.1	-1.2	-1.8	GO:0055114,GO:0016491	AT1G52800.1		2-oxoglutarate (2OG) and Fe(II)-dependent oxygenase superfamily protein
Eucgr.L02027	Eucgr.L02027.1	-1.2	-0.4		AT1G52800.1		2-oxoglutarate (2OG) and Fe(II)-dependent oxygenase superfamily protein
Eucgr.C01505	Eucgr.C01505.1	-1.3	0.18	GO:0055114,GO:0016491	AT1G35190.1		2-oxoglutarate (2OG) and Fe(II)-dependent oxygenase superfamily protein
Eucgr.F03711	Eucgr.F03711.1	-1.3	-1.3	GO:0055114,GO:0016491	AT1G20270.1		2-oxoglutarate (2OG) and Fe(II)-dependent oxygenase superfamily protein
Eucgr.G00914	Eucgr.G00914.1	-1.3	0.47	GO:0055114,GO:0016491	AT2G36690.1		2-oxoglutarate (2OG) and Fe(II)-dependent oxygenase superfamily protein
Eucgr.H03102	Eucgr.H03102.1	-1.3	-0.55	GO:0055114,GO:0016491	AT1G06620.1		2-oxoglutarate (2OG) and Fe(II)-dependent oxygenase superfamily protein
Eucgr.A01598	Eucgr.A01598.1	-1.4	0.16	GO:0055114,GO:0016491	AT2G36690.1		2-oxoglutarate (2OG) and Fe(II)-dependent oxygenase superfamily protein
Eucgr.C00494	Eucgr.C00494.1	-1.4	-0.39	GO:0055114,GO:0016491	AT5G20400.1		2-oxoglutarate (2OG) and Fe(II)-dependent oxygenase superfamily protein
Eucgr.D02288	Eucgr.D02288.1	-1.4	-0.81	GO:0055114,GO:0016491	AT4G23340.1		2-oxoglutarate (2OG) and Fe(II)-dependent oxygenase superfamily protein
Eucgr.G00913	Eucgr.G00913.1	-1.5	1.8	GO:0055114,GO:0016491	AT4G10490.1		2-oxoglutarate (2OG) and Fe(II)-dependent oxygenase superfamily protein
Eucgr.K01277	Eucgr.K01277.1	-1.6	-0.78		AT2G38500.1		2-oxoglutarate (2OG) and Fe(II)-dependent oxygenase superfamily protein
Eucgr.J02578	Eucgr.J02578.1	-1.7	1.3		AT1G14130.1		2-oxoglutarate (2OG) and Fe(II)-dependent oxygenase superfamily protein
Eucgr.J02578	Eucgr.J02578.2	-1.7	1.3		AT1G14130.1		2-oxoglutarate (2OG) and Fe(II)-dependent oxygenase superfamily protein
Eucgr.H00175	Eucgr.H00175.1	-1.8	-1.5	GO:0055114,GO:0016491	AT5G59540.1		2-oxoglutarate (2OG) and Fe(II)-dependent oxygenase superfamily protein
Eucgr.L02834	Eucgr.L02834.1	-1.8	-1.4	GO:0055114,GO:0016491	AT1G49390.1		2-oxoglutarate (2OG) and Fe(II)-dependent oxygenase superfamily protein
Eucgr.L02796	Eucgr.L02796.1	-1.9	-1.9		AT1G49390.1		2-oxoglutarate (2OG) and Fe(II)-dependent oxygenase superfamily protein
Eucgr.C03753	Eucgr.C03753.1	-2	-2.8	GO:0055114,GO:0016491	AT1G35190.1		2-oxoglutarate (2OG) and Fe(II)-dependent oxygenase superfamily protein
Eucgr.C04147	Eucgr.C04147.1	-2	0.96	GO:0055114,GO:0016491	AT1G52820.1		2-oxoglutarate (2OG) and Fe(II)-dependent oxygenase superfamily protein
Eucgr.L00354	Eucgr.L00354.1	-2	-2.8		AT4G10490.1		2-oxoglutarate (2OG) and Fe(II)-dependent oxygenase superfamily protein
Eucgr.L02699	Eucgr.L02699.1	-2	0.42	GO:0055114,GO:0016491	AT1G06620.1		2-oxoglutarate (2OG) and Fe(II)-dependent oxygenase superfamily protein
Eucgr.H00179	Eucgr.H00179.1	-2.2	-1.5	GO:0055114,GO:0016491	AT1G04350.1		2-oxoglutarate (2OG) and Fe(II)-dependent oxygenase superfamily protein
Eucgr.H03111	Eucgr.H03111.1	-2.2	-0.46	GO:0055114,GO:0016491	AT1G06620.1		2-oxoglutarate (2OG) and Fe(II)-dependent oxygenase superfamily protein
Eucgr.H03123	Eucgr.H03123.1	-2.2	-2.5		AT1G06650.2		2-oxoglutarate (2OG) and Fe(II)-dependent oxygenase superfamily protein
Eucgr.I01187	Eucgr.I01187.1	-2.5	0.14	GO:0055114,GO:0016491	AT3G19000.1		2-oxoglutarate (2OG) and Fe(II)-dependent oxygenase superfamily protein
Eucgr.K03275	Eucgr.K03275.2	-2.9	-0.13	GO:0055114,GO:0016491	AT5G43440.1		2-oxoglutarate (2OG) and Fe(II)-dependent oxygenase superfamily protein
Eucgr.K03275	Eucgr.K03275.1	-2.9	-0.13	GO:0055114,GO:0016491	AT1G06620.1		2-oxoglutarate (2OG) and Fe(II)-dependent oxygenase superfamily protein
Eucgr.B00476	Eucgr.B00476.1	-3	-1.2	GO:0055114,GO:0016491	AT3G11180.2		2-oxoglutarate (2OG) and Fe(II)-dependent oxygenase superfamily protein
Eucgr.C03750	Eucgr.C03750.1	-3	2.8		AT1G35190.2		2-oxoglutarate (2OG) and Fe(II)-dependent oxygenase superfamily protein
Eucgr.E02895	Eucgr.E02895.1	-3	1.3		AT4G25300.1		2-oxoglutarate (2OG) and Fe(II)-dependent oxygenase superfamily protein
Eucgr.J01256	Eucgr.J01256.1	-3	-0.76		AT5G48020.1		2-oxoglutarate (2OG) and Fe(II)-dependent oxygenase superfamily protein
Eucgr.J01256	Eucgr.J01256.2	-3	-0.76		AT5G48020.1		2-oxoglutarate (2OG) and Fe(II)-dependent oxygenase superfamily protein
Eucgr.L02497	Eucgr.L02497.2	-3	1.2		AT1G14130.1		2-oxoglutarate (2OG) and Fe(II)-dependent oxygenase superfamily protein
Eucgr.L02497	Eucgr.L02497.1	-3	1.2		AT1G14130.1		2-oxoglutarate (2OG) and Fe(II)-dependent oxygenase superfamily protein
Eucgr.J01253	Eucgr.J01253.2	-3.1	2		AT5G48020.1		2-oxoglutarate (2OG) and Fe(II)-dependent oxygenase superfamily protein
Eucgr.J01253	Eucgr.J01253.1	-3.1	2		AT5G48020.1		2-oxoglutarate (2OG) and Fe(II)-dependent oxygenase superfamily protein
Eucgr.F03917	Eucgr.F03917.2	-3.2	0.027	GO:0055114,GO:0016491	AT1G49390.1		2-oxoglutarate (2OG) and Fe(II)-dependent oxygenase superfamily protein
Eucgr.F03917	Eucgr.F03917.1	-3.2	0.027	GO:0055114,GO:0016491	AT1G49390.1		2-oxoglutarate (2OG) and Fe(II)-dependent oxygenase superfamily protein
Eucgr.G00915	Eucgr.G00915.1	-3.2	0.66	GO:0055114,GO:0016491	AT2G36690.1		2-oxoglutarate (2OG) and Fe(II)-dependent oxygenase superfamily protein
Eucgr.H00181	Eucgr.H00181.1	-3.3	0.03	GO:0055114,GO:0016491	AT1G06620.1		2-oxoglutarate (2OG) and Fe(II)-dependent oxygenase superfamily protein
Eucgr.J03020	Eucgr.J03020.1	-3.4	0.044	GO:0055114,GO:0016491	AT1G52820.1		2-oxoglutarate (2OG) and Fe(II)-dependent oxygenase superfamily protein
Eucgr.H03124	Eucgr.H03124.1	-3.5	-1	GO:0055114,GO:0016491	AT1G06620.1		2-oxoglutarate (2OG) and Fe(II)-dependent oxygenase superfamily protein
Eucgr.I01200	Eucgr.I01200.1	-3.6	-0.94	GO:0055114,GO:0016491	AT3G19000.1		2-oxoglutarate (2OG) and Fe(II)-dependent oxygenase superfamily protein
Eucgr.L02835	Eucgr.L02835.1	-3.9	0.28	GO:0055114,GO:0016491	AT1G49390.1		2-oxoglutarate (2OG) and Fe(II)-dependent oxygenase superfamily protein
Eucgr.F02566	Eucgr.F02566.1	-4.5	-0.12	GO:0055114,GO:0016491	AT1G80320.1		2-oxoglutarate (2OG) and Fe(II)-dependent oxygenase superfamily protein
Eucgr.J03021	Eucgr.J03021.1	-4.5	-0.97	GO:0055114,GO:0016491	AT1G52820.1		2-oxoglutarate (2OG) and Fe(II)-dependent oxygenase superfamily protein
Eucgr.J03023	Eucgr.J03023.1	-4.5	-0.031	GO:0055114,GO:0016491	AT1G52790.1		2-oxoglutarate (2OG) and Fe(II)-dependent oxygenase superfamily protein
Eucgr.F02567	Eucgr.F02567.1	-4.7	0.48	GO:0055114,GO:0016491	AT1G52800.1		2-oxoglutarate (2OG) and Fe(II)-dependent oxygenase superfamily protein
Eucgr.C00493	Eucgr.C00493.1	-6.4	-7.2	GO:0055114,GO:0016491	AT5G54000.1		2-oxoglutarate (2OG) and Fe(II)-dependent oxygenase superfamily protein
Eucgr.B01535	Eucgr.B01535.1	-7.9	0.3	GO:0055114,GO:0016491	AT5G24530.1	DMR6	2-oxoglutarate (2OG) and Fe(II)-dependent oxygenase superfamily protein
Eucgr.C00322	Eucgr.C00322.1	-8	-1.4	GO:0055114,GO:0016491	AT5G54000.1		2-oxoglutarate (2OG) and Fe(II)-dependent oxygenase superfamily protein
Eucgr.L02028	Eucgr.L02028.1	-8.3	0.7	GO:0055114,GO:0016491	AT1G52820.1		2-oxoglutarate (2OG) and Fe(II)-dependent oxygenase superfamily protein
Eucgr.G01375	Eucgr.G01375.1	0.077	-0.21	GO:0016624,GO:0008152,GO:0055114,GO:0030976,GO:0006099,GO:0004591	AT3G55410.1		2-oxoglutarate dehydrogenase, E1 component
Eucgr.J02616	Eucgr.J02616.1	0.38	0.24		AT3G14160.1		2-oxoglutarate-dependent dioxygenase family protein
Eucgr.B01439	Eucgr.B01439.1	-0.4	-0.09		AT5G36700.1	ATPGLP1,PGLP1	2-phosphoglycolate phosphatase 1
Eucgr.B01439	Eucgr.B01439.2	-0.4	-0.09		AT5G36700.4	ATPGLP1,PGLP1	2-phosphoglycolate phosphatase 1
Eucgr.E03839	Eucgr.E03839.1	3.2	1.9		AT5G47760.1	ATPGLP2,ATPK5,PGLP2	2-phosphoglycolate phosphatase 2
Eucgr.E03837	Eucgr.E03837.1	1.6	1.2		AT5G47760.1	ATPGLP2,ATPK5,PGLP2	2-phosphoglycolate phosphatase 2
Eucgr.E03837	Eucgr.E03837.3	1.6	1.2		AT5G47760.1	ATPGLP2,ATPK5,PGLP2	2-phosphoglycolate phosphatase 2
Eucgr.E03837	Eucgr.E03837.2	1.6	1.2		AT5G47760.1	ATPGLP2,ATPK5,PGLP2	2-phosphoglycolate phosphatase 2
Eucgr.L02395	Eucgr.L02395.1	1.1	0.48		AT5G47760.1	ATPGLP2,ATPK5,PGLP2	2-phosphoglycolate phosphatase 2
Eucgr.E03838	Eucgr.E03838.1	0.82	0.15		AT5G47760.1	ATPGLP2,ATPK5,PGLP2	2-phosphoglycolate phosphatase 2
Eucgr.A01442	Eucgr.A01442.2	0.69	0.45	GO:0008408,GO:0006139,GO:0003676	AT5G24340.1		3\'-5\' exonuclease domain-containing protein
Eucgr.A01442	Eucgr.A01442.1	0.69	0.45	GO:0008408,GO:0006139,GO:0003676	AT5G24340.1		3\'-5\' exonuclease domain-containing protein
Eucgr.C00628	Eucgr.C00628.2	0.11	0.029	GO:0003723,GO:0008408,GO:0006139,GO:0003676	AT2G25910.1		3\'-5\' exonuclease domain-containing protein / K homology domain-containing protein / KH domain-containing protein
Eucgr.C00628	Eucgr.C00628.3	0.11	0.029	GO:0008408,GO:0006139,GO:0003676,GO:0003723	AT2G25910.1		3\'-5\' exonuclease domain-containing protein / K homology domain-containing protein / KH domain-containing protein
Eucgr.C00628	Eucgr.C00628.1	0.11	0.029	GO:0003723,GO:0008408,GO:0006139,GO:0003676	AT2G25910.1		3\'-5\' exonuclease domain-containing protein / K homology domain-containing protein / KH domain-containing protein
Eucgr.A00063	Eucgr.A00063.1	0.72	0.75		AT1G60080.1		3\'-5\'-exoribonuclease family protein
Eucgr.H02323	Eucgr.H02323.2	0.45	0.052		AT3G60500.1	CER7,G3	3\'-5\'-exoribonuclease family protein
Eucgr.H02323	Eucgr.H02323.1	0.45	0.052		AT3G60500.2	CER7,G3	3\'-5\'-exoribonuclease family protein
Eucgr.H02323	Eucgr.H02323.3	0.45	0.052		AT3G60500.3	CER7,G3	3\'-5\'-exoribonuclease family protein
Eucgr.J00908	Eucgr.J00908.1	0.45	0.27		AT4G27490.1		3\'-5\'-exoribonuclease family protein
Eucgr.G02573	Eucgr.G02573.1	0.097	0.15		AT3G07750.2		3\'-5\'-exoribonuclease family protein
Eucgr.G01770	Eucgr.G01770.1	0	6.4		AT3G07750.1		3\'-5\'-exoribonuclease family protein
Eucgr.A00266	Eucgr.A00266.1	-0.16	2		AT1G60080.1		3\'-5\'-exoribonuclease family protein
Eucgr.A00267	Eucgr.A00267.1	-0.23	0.48		AT1G60080.1		3\'-5\'-exoribonuclease family protein
Eucgr.F04376	Eucgr.F04376.1	-0.23	-0.26		AT3G61620.2	RRP41	3\'-5\'-exoribonuclease family protein
Eucgr.A00069	Eucgr.A00069.1	-1.2	0.64		AT1G60080.1		3\'-5\'-exoribonuclease family protein
Eucgr.A00263	Eucgr.A00263.1	-1.6	0.52		AT1G60080.1		3\'-5\'-exoribonuclease family protein
Eucgr.A00059	Eucgr.A00059.1	-2.2	-1.2		AT1G60080.1		3\'-5\'-exoribonuclease family protein
Eucgr.A00265	Eucgr.A00265.1	-2.8	0.29		AT1G60080.1		3\'-5\'-exoribonuclease family protein
Eucgr.J01029	Eucgr.J01029.1	-0.18	0.071		AT5G04510.1	ATPDK1,PDK1	3\'-phosphoinositide-dependent protein kinase 1
Eucgr.A01406	Eucgr.A01406.1	-0.03	-0.29	GO:0044238	AT5G24490.1		30S ribosomal protein, putative
Eucgr.B00177	Eucgr.B00177.1	-0.33	-0.026	GO:0003676	AT4G24770.1	ATRBP31,ATRBP33,CP31,RBP31	31-kDa RNA binding protein
Eucgr.C00745	Eucgr.C00745.1	-0.83	-0.33		AT2G26260.1	3BETAHSD/D2,AT3BETAHSD/D2	3beta-hydroxysteroid-dehydrogenase/decarboxylase isoform 2
Eucgr.J02467	Eucgr.J02467.1	-0.19	0.058		AT5G66120.2		3-dehydroquinate synthase, putative
Eucgr.H04748	Eucgr.H04748.2	0.2	-0.01	GO:0009073,GO:0003849	AT4G33510.1	DHS2	3-deoxy-d-arabino-heptulosonate 7-phosphate synthase
Eucgr.G00854	Eucgr.G00854.1	-0.52	-0.36	GO:0009073,GO:0003849	AT4G33510.1	DHS2	3-deoxy-d-arabino-heptulosonate 7-phosphate synthase
Eucgr.H04748	Eucgr.H04748.1	0.2	-0.01	GO:0009073,GO:0003849	AT4G39980.1	DHS1	3-deoxy-D-arabino-heptulosonate 7-phosphate synthase 1
Eucgr.I00519	Eucgr.I00519.1	-1.4	-0.56	GO:0009073,GO:0003849	AT4G39980.1	DHS1	3-deoxy-D-arabino-heptulosonate 7-phosphate synthase 1
Eucgr.F03304	Eucgr.F03304.2	-0.17	-0.27	GO:0055114,GO:0004616,GO:0016491,GO:0006631,GO:0003857	AT3G15290.1		3-hydroxyacyl-CoA dehydrogenase family protein
Eucgr.F03304	Eucgr.F03304.1	-0.17	-0.27	GO:0055114,GO:0004616,GO:0016491,GO:0006631,GO:0003857	AT3G15290.1		3-hydroxyacyl-CoA dehydrogenase family protein
Eucgr.D01763	Eucgr.D01763.1	0.96	0.4		AT5G46290.1	KAS I,KAS1	3-ketoacyl-acyl carrier protein synthase I
Eucgr.D00305	Eucgr.D00305.1	-0.14	-0.25		AT5G46290.1	KAS I,KAS1	3-ketoacyl-acyl carrier protein synthase I
Eucgr.D00305	Eucgr.D00305.2	-0.14	-0.25		AT5G46290.1	KAS I,KAS1	3-ketoacyl-acyl carrier protein synthase I
Eucgr.E00458	Eucgr.E00458.1	0.048	-0.079	GO:0006633,GO:0004315,GO:0016747,GO:0008610	AT1G62640.1	KAS III	3-ketoacyl-acyl carrier protein synthase III
Eucgr.E00458	Eucgr.E00458.3	0.048	-0.079	GO:0006633,GO:0004315	AT1G62640.1	KAS III	3-ketoacyl-acyl carrier protein synthase III
Eucgr.E00458	Eucgr.E00458.2	0.048	-0.079	GO:0006633,GO:0004315,GO:0016747,GO:0008610	AT1G62640.2	KAS III	3-ketoacyl-acyl carrier protein synthase III
Eucgr.D02646	Eucgr.D02646.1	0.96	-0.14	GO:0016747,GO:0008610,GO:0016020,GO:0006633	AT1G01120.1	KCS1	3-ketoacyl-CoA synthase 1
Eucgr.C03177	Eucgr.C03177.1	0	0	GO:0016747,GO:0008610,GO:0016020,GO:0006633	AT2G26250.1	FDH,KCS10	3-ketoacyl-CoA synthase 10
Eucgr.G03137	Eucgr.G03137.1	0	6.9	GO:0016747,GO:0008610,GO:0016020,GO:0006633	AT2G26250.1	FDH,KCS10	3-ketoacyl-CoA synthase 10
Eucgr.H00225	Eucgr.H00225.1	1	0.063	GO:0016747,GO:0008610,GO:0016020,GO:0006633	AT2G26640.1	KCS11	3-ketoacyl-CoA synthase 11
Eucgr.H03186	Eucgr.H03186.1	0.96	-0.095	GO:0016747,GO:0008610,GO:0016020,GO:0006633	AT2G26640.1	KCS11	3-ketoacyl-CoA synthase 11
Eucgr.D00055	Eucgr.D00055.1	0.26	-0.14	GO:0016747,GO:0008610,GO:0016020,GO:0006633	AT2G26640.1	KCS11	3-ketoacyl-CoA synthase 11
Eucgr.C01804	Eucgr.C01804.1	-0.052	-0.61	GO:0016747,GO:0008610,GO:0016020,GO:0006633	AT2G26640.1	KCS11	3-ketoacyl-CoA synthase 11
Eucgr.C04159	Eucgr.C04159.1	-0.19	-0.64	GO:0016747,GO:0008610,GO:0016020,GO:0006633	AT2G26640.1	KCS11	3-ketoacyl-CoA synthase 11
Eucgr.H00229	Eucgr.H00229.1	-1.5	1.3	GO:0016747,GO:0008610,GO:0016020,GO:0006633	AT2G26640.1	KCS11	3-ketoacyl-CoA synthase 11
Eucgr.I01277	Eucgr.I01277.1	-0.83	-0.36	GO:0016747,GO:0008610,GO:0016020,GO:0006633	AT4G34250.1	KCS16	3-ketoacyl-CoA synthase 16
Eucgr.J01159	Eucgr.J01159.3	-2.1	-1.1	GO:0016747,GO:0008610,GO:0016020,GO:0006633	AT5G04530.1	KCS19	3-ketoacyl-CoA synthase 19
Eucgr.J01159	Eucgr.J01159.2	-2.1	-1.1	GO:0016747,GO:0008610,GO:0016020,GO:0006633	AT5G04530.1	KCS19	3-ketoacyl-CoA synthase 19
Eucgr.J01159	Eucgr.J01159.1	-2.1	-1.1	GO:0016747,GO:0008610,GO:0016020,GO:0006633	AT5G04530.1	KCS19	3-ketoacyl-CoA synthase 19
Eucgr.H00235	Eucgr.H00235.1	-0.23	-0.35	GO:0016747,GO:0008610,GO:0016020,GO:0006633	AT1G04220.1	KCS2	3-ketoacyl-CoA synthase 2
Eucgr.H00232	Eucgr.H00232.1	-0.32	-0.56	GO:0016747,GO:0008610,GO:0016020,GO:0006633	AT1G04220.1	KCS2	3-ketoacyl-CoA synthase 2
Eucgr.D00054	Eucgr.D00054.1	-0.42	-0.19	GO:0016747,GO:0016020,GO:0006633	AT1G04220.1	KCS2	3-ketoacyl-CoA synthase 2
Eucgr.D00056	Eucgr.D00056.1	-0.96	-0.36	GO:0016747,GO:0008610,GO:0016020,GO:0006633	AT1G04220.1	KCS2	3-ketoacyl-CoA synthase 2
Eucgr.H00234	Eucgr.H00234.1	-1.6	0.23	GO:0016747,GO:0008610,GO:0016020,GO:0006633	AT1G04220.1	KCS2	3-ketoacyl-CoA synthase 2
Eucgr.H00226	Eucgr.H00226.1	-3	-0.34	GO:0016747,GO:0008610,GO:0016020,GO:0006633	AT1G04220.1	KCS2	3-ketoacyl-CoA synthase 2
Eucgr.H03940	Eucgr.H03940.1	-1	-1.8	GO:0016747,GO:0008610,GO:0016020,GO:0006633	AT5G49070.1	KCS21	3-ketoacyl-CoA synthase 21
Eucgr.F02683	Eucgr.F02683.1	0	0	GO:0016747,GO:0008610,GO:0016020,GO:0006633	AT1G19440.1	KCS4	3-ketoacyl-CoA synthase 4
Eucgr.G02324	Eucgr.G02324.1	1	0.089	GO:0016747,GO:0008610,GO:0016020,GO:0006633	AT1G68530.1	CER6,CUT1,G2,KCS6,POP1	3-ketoacyl-CoA synthase 6
Eucgr.A02860	Eucgr.A02860.1	-6.1	-0.95	GO:0016747,GO:0008610,GO:0016020,GO:0006633	AT2G16280.1	KCS9	3-ketoacyl-CoA synthase 9
Eucgr.G01434	Eucgr.G01434.1	0.61	0.043		AT4G34030.1	MCCB	3-methylcrotonyl-CoA carboxylase
Eucgr.G01434	Eucgr.G01434.2	0.61	0.043		AT4G34030.1	MCCB	3-methylcrotonyl-CoA carboxylase
Eucgr.H01470	Eucgr.H01470.1	0.93	0.73	GO:0016627,GO:0016021,GO:0006629,GO:0005737	AT2G16530.1		3-oxo-5-alpha-steroid 4-dehydrogenase family protein
Eucgr.G02931	Eucgr.G02931.1	0.011	-0.15	GO:0016627,GO:0016021,GO:0006629,GO:0005737	AT3G55360.1	ATTSC13,CER10,ECR,TSC13	3-oxo-5-alpha-steroid 4-dehydrogenase family protein
Eucgr.L02951	Eucgr.L02951.1	0.0037	-1.2	GO:0016627,GO:0016021,GO:0006629,GO:0005737	AT5G16010.1		3-oxo-5-alpha-steroid 4-dehydrogenase family protein
Eucgr.G02660	Eucgr.G02660.1	0	0	GO:0016627,GO:0016021,GO:0006629,GO:0005737	AT5G16010.1		3-oxo-5-alpha-steroid 4-dehydrogenase family protein
Eucgr.G02661	Eucgr.G02661.1	-0.023	-2.2	GO:0016627,GO:0016021,GO:0006629,GO:0005737	AT5G16010.1		3-oxo-5-alpha-steroid 4-dehydrogenase family protein
Eucgr.G01738	Eucgr.G01738.1	-0.32	0.64	GO:0016627,GO:0016021,GO:0006629,GO:0005737	AT2G16530.1		3-oxo-5-alpha-steroid 4-dehydrogenase family protein
Eucgr.D02079	Eucgr.D02079.2	-0.35	-0.23		AT2G38050.1	ATDET2,DET2,DWF6	3-oxo-5-alpha-steroid 4-dehydrogenase family protein
Eucgr.D02079	Eucgr.D02079.1	-0.35	-0.23		AT2G38050.1	ATDET2,DET2,DWF6	3-oxo-5-alpha-steroid 4-dehydrogenase family protein
Eucgr.D02079	Eucgr.D02079.4	-0.35	-0.23		AT2G38050.1	ATDET2,DET2,DWF6	3-oxo-5-alpha-steroid 4-dehydrogenase family protein
Eucgr.D02079	Eucgr.D02079.3	-0.35	-0.23		AT2G38050.1	ATDET2,DET2,DWF6	3-oxo-5-alpha-steroid 4-dehydrogenase family protein
Eucgr.G02662	Eucgr.G02662.1	-1.8	-1.1	GO:0016627,GO:0016021,GO:0006629,GO:0005737	AT5G16010.1		3-oxo-5-alpha-steroid 4-dehydrogenase family protein
Eucgr.C02170	Eucgr.C02170.2	0.78	-0.16		AT3G10572.1		3-phosphoinositide-dependent protein kinase-1, putative
Eucgr.C02170	Eucgr.C02170.1	0.78	-0.16		AT3G10572.1		3-phosphoinositide-dependent protein kinase-1, putative
Eucgr.K02531	Eucgr.K02531.1	0.055	0.16		AT1G18640.2	PSP	3-phosphoserine phosphatase
Eucgr.K02531	Eucgr.K02531.2	0.055	0.16		AT1G18640.2	PSP	3-phosphoserine phosphatase
Eucgr.J00662	Eucgr.J00662.3	0.74	0.3	GO:0005524,GO:0050515,GO:0016114	AT2G26930.1	ATCDPMEK,CDPMEK,ISPE,PDE277	4-(cytidine 5\'-phospho)-2-C-methyl-D-erithritol kinase
Eucgr.J00662	Eucgr.J00662.2	0.74	0.3	GO:0005524,GO:0050515,GO:0016114	AT2G26930.1	ATCDPMEK,CDPMEK,ISPE,PDE277	4-(cytidine 5\'-phospho)-2-C-methyl-D-erithritol kinase
Eucgr.J00662	Eucgr.J00662.1	0.74	0.3	GO:0005524,GO:0050515,GO:0016114	AT2G26930.1	ATCDPMEK,CDPMEK,ISPE,PDE277	4-(cytidine 5\'-phospho)-2-C-methyl-D-erithritol kinase
Eucgr.A02654	Eucgr.A02654.2	0.44	0.62	GO:0008897,GO:0000287	AT3G11470.3		4\'-phosphopantetheinyl transferase superfamily
Eucgr.A02654	Eucgr.A02654.3	0.44	0.62	GO:0008897,GO:0000287	AT3G11470.3		4\'-phosphopantetheinyl transferase superfamily
Eucgr.A02654	Eucgr.A02654.1	0.44	0.62	GO:0008897,GO:0000287	AT3G11470.1		4\'-phosphopantetheinyl transferase superfamily
Eucgr.J00256	Eucgr.J00256.1	0.4	0.17	GO:0008897,GO:0000287	AT3G11470.2		4\'-phosphopantetheinyl transferase superfamily
Eucgr.I02137	Eucgr.I02137.3	0.095	-0.11	GO:0006412,GO:0005840,GO:0005622,GO:0003735,GO:0015935	AT3G04770.2	RPSAb	40s ribosomal protein SA B
Eucgr.I02137	Eucgr.I02137.1	0.095	-0.11	GO:0006412,GO:0005840,GO:0005622,GO:0003735,GO:0015935	AT3G04770.2	RPSAb	40s ribosomal protein SA B
Eucgr.I02137	Eucgr.I02137.2	0.095	-0.11	GO:0006412,GO:0005840,GO:0005622,GO:0003735,GO:0015935	AT3G04770.2	RPSAb	40s ribosomal protein SA B
Eucgr.J02605	Eucgr.J02605.1	-0.11	-0.29	GO:0006412,GO:0005840,GO:0005622,GO:0003735,GO:0015935	AT3G04770.2	RPSAb	40s ribosomal protein SA B
Eucgr.J02605	Eucgr.J02605.2	-0.11	-0.29	GO:0006412,GO:0005840,GO:0005622,GO:0003735,GO:0015935	AT3G04770.2	RPSAb	40s ribosomal protein SA B
Eucgr.C02284	Eucgr.C02284.1	0.57	0.04	GO:0008152,GO:0003824	AT1G51680.1	4CL.1,4CL1,AT4CL1	4-coumarate:CoA ligase 1
Eucgr.C02284	Eucgr.C02284.2	0.57	0.04	GO:0008152,GO:0003824	AT1G51680.1	4CL.1,4CL1,AT4CL1	4-coumarate:CoA ligase 1
Eucgr.K00087	Eucgr.K00087.2	-0.16	-0.27	GO:0008152,GO:0003824	AT1G65060.1	4CL3	4-coumarate:CoA ligase 3
Eucgr.K00087	Eucgr.K00087.1	-0.16	-0.27	GO:0008152,GO:0003824	AT1G65060.1	4CL3	4-coumarate:CoA ligase 3
Eucgr.C00644	Eucgr.C00644.1	0.68	-0.039	GO:0051745,GO:0050992,GO:0046872,GO:0019288	AT4G34350.1	CLB6,HDR,ISPH	4-hydroxy-3-methylbut-2-enyl diphosphate reductase
Eucgr.I01241	Eucgr.I01241.1	0.46	0.1	GO:0051745,GO:0050992,GO:0046872,GO:0019288	AT4G34350.1	CLB6,HDR,ISPH	4-hydroxy-3-methylbut-2-enyl diphosphate reductase
Eucgr.B02495	Eucgr.B02495.1	0.053	0.0043	GO:0055114,GO:0046429,GO:0016114	AT5G60600.1	CLB4,CSB3,GCPE,HDS,ISPG	4-hydroxy-3-methylbut-2-enyl diphosphate synthase
Eucgr.F04382	Eucgr.F04382.1	0.61	0.21		AT1G12350.1	ATCOAB,COAB	4-phospho-panto-thenoylcysteine synthetase
Eucgr.H02815	Eucgr.H02815.1	2.3	-0.041	GO:0006281,GO:0004518	AT1G29630.2		5\'-3\' exonuclease family protein
Eucgr.B01336	Eucgr.B01336.1	2	-2	GO:0004518,GO:0006281	AT5G26680.2		5\'-3\' exonuclease family protein
Eucgr.B01341	Eucgr.B01341.1	1.2	3.7	GO:0006281,GO:0004518	AT5G26680.2		5\'-3\' exonuclease family protein
Eucgr.B01331	Eucgr.B01331.1	0.81	-0.047	GO:0004518,GO:0006281	AT5G26680.1		5\'-3\' exonuclease family protein
Eucgr.B01348	Eucgr.B01348.2	0.6	-0.16	GO:0004518,GO:0006281	AT5G26680.2		5\'-3\' exonuclease family protein
Eucgr.B01348	Eucgr.B01348.1	0.6	-0.16	GO:0004518,GO:0006281	AT5G26680.2		5\'-3\' exonuclease family protein
Eucgr.B01344	Eucgr.B01344.1	0.25	0.34	GO:0004518,GO:0006281	AT5G26680.1		5\'-3\' exonuclease family protein
Eucgr.B01335	Eucgr.B01335.1	0.19	-2.4	GO:0006281,GO:0004518	AT5G26680.2		5\'-3\' exonuclease family protein
Eucgr.A00006	Eucgr.A00006.1	0.18	0.049	GO:0003824,GO:0003677	AT3G52050.3		5\'-3\' exonuclease family protein
Eucgr.I01829	Eucgr.I01829.1	0.13	0.13	GO:0004518,GO:0006281,GO:0006289,GO:0005634,GO:0004519,GO:0003697	AT3G28030.1	UVH3,UVR1	5\'-3\' exonuclease family protein
Eucgr.E00282	Eucgr.E00282.1	0.085	-0.012	GO:0006281,GO:0004518	AT1G01880.1		5\'-3\' exonuclease family protein
Eucgr.B01339	Eucgr.B01339.1	0	0	GO:0004518,GO:0006281	AT5G26680.2		5\'-3\' exonuclease family protein
Eucgr.H01340	Eucgr.H01340.2	-0.044	0.2	GO:0006281,GO:0004518	AT5G26680.2		5\'-3\' exonuclease family protein
Eucgr.H01340	Eucgr.H01340.1	-0.044	0.2	GO:0006281,GO:0004518	AT5G26680.2		5\'-3\' exonuclease family protein
Eucgr.H01340	Eucgr.H01340.3	-0.044	0.2	GO:0006281,GO:0004518	AT5G26680.2		5\'-3\' exonuclease family protein
Eucgr.F04135	Eucgr.F04135.1	-0.082	0.84	GO:0003824,GO:0003677	AT1G34380.2		5\'-3\' exonuclease family protein
Eucgr.B01346	Eucgr.B01346.1	-0.26	-0.17	GO:0006281,GO:0004518	AT5G26680.2		5\'-3\' exonuclease family protein
Eucgr.B01329	Eucgr.B01329.1	-0.3	1	GO:0006281,GO:0004518	AT5G26680.2		5\'-3\' exonuclease family protein
Eucgr.D00356	Eucgr.D00356.2	-0.72	-0.032	GO:0004518,GO:0006281	AT1G29630.2		5\'-3\' exonuclease family protein
Eucgr.D00356	Eucgr.D00356.1	-0.72	-0.032	GO:0004518,GO:0006281	AT1G29630.2		5\'-3\' exonuclease family protein
Eucgr.D00356	Eucgr.D00356.3	-0.72	-0.032	GO:0004518,GO:0006281	AT1G29630.2		5\'-3\' exonuclease family protein
Eucgr.B01326	Eucgr.B01326.1	-0.73	0.12	GO:0004518,GO:0006281	AT5G26680.2		5\'-3\' exonuclease family protein
Eucgr.B01328	Eucgr.B01328.1	-0.76	1.4	GO:0004518,GO:0006281	AT5G26680.2		5\'-3\' exonuclease family protein
Eucgr.B01834	Eucgr.B01834.1	-1.3	0.59	GO:0006281,GO:0004518	AT5G26680.2		5\'-3\' exonuclease family protein
Eucgr.B00858	Eucgr.B00858.1	-1.4	-0.43	GO:0004518,GO:0006281	AT1G18090.1		5\'-3\' exonuclease family protein
Eucgr.D00367	Eucgr.D00367.1	-1.4	-2.3		AT1G29630.2		5\'-3\' exonuclease family protein
Eucgr.D00367	Eucgr.D00367.3	-1.4	-2.3		AT1G29630.1		5\'-3\' exonuclease family protein
Eucgr.D00367	Eucgr.D00367.2	-1.4	-2.3		AT1G29630.2		5\'-3\' exonuclease family protein
Eucgr.B01342	Eucgr.B01342.1	-1.5	-0.7	GO:0006281,GO:0004518	AT5G26680.2		5\'-3\' exonuclease family protein
Eucgr.J01445	Eucgr.J01445.2	-1.9	4.2	GO:0004518,GO:0006281	AT5G26680.2		5\'-3\' exonuclease family protein
Eucgr.J01445	Eucgr.J01445.1	-1.9	4.2	GO:0004518,GO:0006281	AT5G26680.2		5\'-3\' exonuclease family protein
Eucgr.B01835	Eucgr.B01835.1	-2	0.53	GO:0004518,GO:0006281	AT5G26680.2		5\'-3\' exonuclease family protein
Eucgr.D00376	Eucgr.D00376.1	-3.2	-0.27	GO:0006281,GO:0004518	AT1G29630.2		5\'-3\' exonuclease family protein
Eucgr.F01638	Eucgr.F01638.1	0.6	0.22	GO:0008270,GO:0003676,GO:0004527	AT1G75660.1	AtXRN3,XRN3	5\'-3\' exoribonuclease 3
Eucgr.J00639	Eucgr.J00639.1	0.31	-0.21	GO:0005515,GO:0043562,GO:0009744	AT5G21170.1	AKINBETA1	5\'-AMP-activated protein kinase beta-2 subunit protein
Eucgr.J00900	Eucgr.J00900.1	0.24	0.089	GO:0005515,GO:0043562,GO:0009744	AT2G28060.1		5\'-AMP-activated protein kinase beta-2 subunit protein
Eucgr.L00156	Eucgr.L00156.1	0.24	0.076	GO:0005515,GO:0043562,GO:0009744	AT4G16360.3		5\'-AMP-activated protein kinase beta-2 subunit protein
Eucgr.H00877	Eucgr.H00877.2	-0.081	-0.12	GO:0005515,GO:0043562,GO:0009744	AT4G16360.3		5\'-AMP-activated protein kinase beta-2 subunit protein
Eucgr.H00877	Eucgr.H00877.5	-0.081	-0.12	GO:0005515,GO:0043562,GO:0009744	AT4G16360.3		5\'-AMP-activated protein kinase beta-2 subunit protein
Eucgr.H00877	Eucgr.H00877.1	-0.081	-0.12	GO:0005515,GO:0043562,GO:0009744	AT4G16360.3		5\'-AMP-activated protein kinase beta-2 subunit protein
Eucgr.H00877	Eucgr.H00877.4	-0.081	-0.12	GO:0005515,GO:0043562,GO:0009744	AT4G16360.3		5\'-AMP-activated protein kinase beta-2 subunit protein
Eucgr.H00877	Eucgr.H00877.3	-0.081	-0.12	GO:0005515,GO:0043562,GO:0009744	AT4G16360.3		5\'-AMP-activated protein kinase beta-2 subunit protein
Eucgr.A01669	Eucgr.A01669.1	0.43	0.78		AT5G03420.1		5\'-AMP-activated protein kinase-related
Eucgr.J01591	Eucgr.J01591.1	0.17	0.23		AT5G39790.1		5\'-AMP-activated protein kinase-related
Eucgr.J01591	Eucgr.J01591.2	0.17	0.23		AT5G39790.1		5\'-AMP-activated protein kinase-related
Eucgr.B03405	Eucgr.B03405.1	0.072	0.47		AT1G27070.1		5\'-AMP-activated protein kinase-related
Eucgr.G02667	Eucgr.G02667.1	-0.84	-0.24	GO:0008253,GO:0005737,GO:0000287	AT2G38680.1		5\'-nucleotidases;magnesium ion binding
Eucgr.J01514	Eucgr.J01514.1	-1.6	-0.72		AT5G16200.1		50S ribosomal protein-related
Eucgr.H04659	Eucgr.H04659.1	-0.41	-0.47	GO:0051539	AT5G08530.1	CI51	51 kDa subunit of complex I
Eucgr.B00384	Eucgr.B00384.1	0.18	0.13		AT5G13050.1	5-FCL	5-formyltetrahydrofolate cycloligase
Eucgr.F02801	Eucgr.F02801.1	-0.12	-0.87	GO:0009349,GO:0009231	AT2G44050.1	COS1	6,7-dimethyl-8-ribityllumazine synthase / DMRL synthase / lumazine synthase / riboflavin synthase
Eucgr.L01202	Eucgr.L01202.1	-0.15	0.048	GO:0009349,GO:0009231	AT2G44050.1	COS1	6,7-dimethyl-8-ribityllumazine synthase / DMRL synthase / lumazine synthase / riboflavin synthase
Eucgr.E00482	Eucgr.E00482.1	0.78	0.041		AT5G24510.1		60S acidic ribosomal protein family
Eucgr.A01410	Eucgr.A01410.1	0.17	-0.72		AT5G57290.1		60S acidic ribosomal protein family
Eucgr.A00378	Eucgr.A00378.2	0.062	-0.24		AT3G44590.1		60S acidic ribosomal protein family
Eucgr.A00378	Eucgr.A00378.1	0.062	-0.24		AT3G44590.2		60S acidic ribosomal protein family
Eucgr.J00465	Eucgr.J00465.1	-0.041	-0.15		AT3G44590.2		60S acidic ribosomal protein family
Eucgr.J00465	Eucgr.J00465.2	-0.041	-0.15		AT2G27710.4		60S acidic ribosomal protein family
Eucgr.J00465	Eucgr.J00465.3	-0.041	-0.15		AT3G44590.1		60S acidic ribosomal protein family
Eucgr.J00465	Eucgr.J00465.4	-0.041	-0.15		AT3G44590.1		60S acidic ribosomal protein family
Eucgr.K00427	Eucgr.K00427.1	-0.046	-0.17		AT5G24510.1		60S acidic ribosomal protein family
Eucgr.C02261	Eucgr.C02261.1	-0.23	-0.44		AT5G57290.1		60S acidic ribosomal protein family
Eucgr.A01408	Eucgr.A01408.1	-0.24	-0.19		AT5G24510.1		60S acidic ribosomal protein family
Eucgr.C02263	Eucgr.C02263.1	-1.1	-0.6		AT5G57290.1		60S acidic ribosomal protein family
Eucgr.B02380	Eucgr.B02380.2	0.58	0.12	GO:0051205,GO:0016021	AT2G28800.1	ALB3	63 kDa inner membrane family protein
Eucgr.B02380	Eucgr.B02380.3	0.58	0.12	GO:0051205,GO:0016021	AT2G28800.1	ALB3	63 kDa inner membrane family protein
Eucgr.B02380	Eucgr.B02380.1	0.58	0.12	GO:0051205,GO:0016021	AT2G28800.1	ALB3	63 kDa inner membrane family protein
Eucgr.C00990	Eucgr.C00990.1	1	-0.82	GO:0051287	AT4G29120.1		6-phosphogluconate dehydrogenase family protein
Eucgr.A02311	Eucgr.A02311.2	0.44	-0.37	GO:0055114,GO:0051287,GO:0046168,GO:0016616,GO:0005975,GO:0004367,GO:0009331,GO:0006072	AT2G41540.2	GPDHC1	6-phosphogluconate dehydrogenase family protein
Eucgr.A02311	Eucgr.A02311.1	0.44	-0.37	GO:0055114,GO:0051287,GO:0046168,GO:0016616,GO:0005975,GO:0004367,GO:0009331,GO:0006072	AT2G41540.2	GPDHC1	6-phosphogluconate dehydrogenase family protein
Eucgr.G03271	Eucgr.G03271.1	0.3	0.0075	GO:0055114,GO:0051287,GO:0046168,GO:0016616,GO:0005975,GO:0004367,GO:0009331,GO:0006072	AT3G07690.1		6-phosphogluconate dehydrogenase family protein
Eucgr.D00258	Eucgr.D00258.1	0.23	-1.2	GO:0051287	AT4G20930.1		6-phosphogluconate dehydrogenase family protein
Eucgr.C00995	Eucgr.C00995.1	-0.12	-0.022	GO:0051287	AT4G29120.1		6-phosphogluconate dehydrogenase family protein
Eucgr.D00129	Eucgr.D00129.1	-0.12	0.11	GO:0051287	AT4G20930.1		6-phosphogluconate dehydrogenase family protein
Eucgr.D00129	Eucgr.D00129.2	-0.12	0.11	GO:0051287	AT4G20930.1		6-phosphogluconate dehydrogenase family protein
Eucgr.D01779	Eucgr.D01779.1	-0.3	-0.29	GO:0055114,GO:0050661,GO:0006098,GO:0004616	AT5G41670.2		6-phosphogluconate dehydrogenase family protein
Eucgr.I02092	Eucgr.I02092.1	-0.39	-0.26	GO:0055114,GO:0004616,GO:0050661,GO:0006098	AT3G02360.2		6-phosphogluconate dehydrogenase family protein
Eucgr.I02092	Eucgr.I02092.2	-0.39	-0.26	GO:0055114,GO:0004616,GO:0050661,GO:0006098	AT3G02360.2		6-phosphogluconate dehydrogenase family protein
Eucgr.L03401	Eucgr.L03401.1	-0.56	-0.43	GO:0055114,GO:0004616	AT4G29120.1		6-phosphogluconate dehydrogenase family protein
Eucgr.I02726	Eucgr.I02726.1	-1.2	-0.21	GO:0051287	AT1G71180.1		6-phosphogluconate dehydrogenase family protein
Eucgr.C00992	Eucgr.C00992.1	-5.4	0.45	GO:0051287	AT4G29120.1		6-phosphogluconate dehydrogenase family protein
Eucgr.G02431	Eucgr.G02431.1	1.7	-0.94	GO:0005975	AT1G13700.1	PGL1	6-phosphogluconolactonase 1
Eucgr.B03143	Eucgr.B03143.3	-0.31	-0.17	GO:0005975	AT1G13700.1	PGL1	6-phosphogluconolactonase 1
Eucgr.B03143	Eucgr.B03143.2	-0.31	-0.17	GO:0005975	AT1G13700.1	PGL1	6-phosphogluconolactonase 1
Eucgr.B03143	Eucgr.B03143.1	-0.31	-0.17	GO:0005975	AT1G13700.1	PGL1	6-phosphogluconolactonase 1
Eucgr.F03811	Eucgr.F03811.2	0.038	-0.2	GO:0006284,GO:0008534,GO:0006289,GO:0003684	AT1G21710.1	ATOGG1,OGG1	8-oxoguanine-DNA glycosylase 1
Eucgr.F03811	Eucgr.F03811.1	0.038	-0.2	GO:0006284,GO:0008534,GO:0006289,GO:0003684	AT1G21710.1	ATOGG1,OGG1	8-oxoguanine-DNA glycosylase 1
Eucgr.C03794	Eucgr.C03794.1	5.3	0	GO:0008270,GO:0003677	AT4G22820.2		A20/AN1-like zinc finger family protein
Eucgr.G03392	Eucgr.G03392.1	0.55	-0.21	GO:0008270,GO:0003677	AT3G12630.1		A20/AN1-like zinc finger family protein
Eucgr.K01814	Eucgr.K01814.1	0.34	-0.23	GO:0008270,GO:0003677	AT1G51200.4		A20/AN1-like zinc finger family protein
Eucgr.B03873	Eucgr.B03873.1	0.3	-0.14	GO:0008270,GO:0003677	AT2G27580.2		A20/AN1-like zinc finger family protein
Eucgr.J00790	Eucgr.J00790.4	0.06	-0.21	GO:0008270,GO:0003677	AT1G51200.1		A20/AN1-like zinc finger family protein
Eucgr.J00790	Eucgr.J00790.2	0.06	-0.21	GO:0008270,GO:0003677	AT1G51200.4		A20/AN1-like zinc finger family protein
Eucgr.J00790	Eucgr.J00790.5	0.06	-0.21	GO:0008270,GO:0003677	AT1G51200.1		A20/AN1-like zinc finger family protein
Eucgr.J00790	Eucgr.J00790.3	0.06	-0.21	GO:0008270,GO:0003677	AT1G51200.1		A20/AN1-like zinc finger family protein
Eucgr.J00790	Eucgr.J00790.1	0.06	-0.21	GO:0008270,GO:0003677	AT1G51200.3		A20/AN1-like zinc finger family protein
Eucgr.H04886	Eucgr.H04886.1	0.059	-0.34	GO:0008270,GO:0003677	AT4G12040.2		A20/AN1-like zinc finger family protein
Eucgr.D01966	Eucgr.D01966.1	-0.023	0.27	GO:0008270,GO:0003677	AT1G12440.1		A20/AN1-like zinc finger family protein
Eucgr.K01813	Eucgr.K01813.1	-0.29	-0.19	GO:0008270,GO:0003677	AT1G51200.1		A20/AN1-like zinc finger family protein
Eucgr.K01813	Eucgr.K01813.2	-0.29	-0.19	GO:0008270,GO:0003677	AT1G51200.1		A20/AN1-like zinc finger family protein
Eucgr.A02408	Eucgr.A02408.1	-2.8	-0.24	GO:0008270,GO:0003677	AT1G51200.4		A20/AN1-like zinc finger family protein
Eucgr.L00796	Eucgr.L00796.1	1.6	-1.3	GO:0005524	AT5G40010.1	AATP1	AAA-ATPase 1
Eucgr.L00795	Eucgr.L00795.1	1.2	-0.28	GO:0005524	AT5G40010.1	AATP1	AAA-ATPase 1
Eucgr.I01907	Eucgr.I01907.1	0.76	0.16	GO:0005524	AT5G40010.1	AATP1	AAA-ATPase 1
Eucgr.I01906	Eucgr.I01906.1	0.56	0.83	GO:0005524	AT5G40010.1	AATP1	AAA-ATPase 1
Eucgr.L03199	Eucgr.L03199.1	-0.28	-1.6	GO:0005524	AT5G40010.1	AATP1	AAA-ATPase 1
Eucgr.J02151	Eucgr.J02151.1	-0.38	1.2	GO:0005524	AT5G40010.1	AATP1	AAA-ATPase 1
Eucgr.J02150	Eucgr.J02150.1	-0.39	-1	GO:0005524	AT5G40010.1	AATP1	AAA-ATPase 1
Eucgr.L03241	Eucgr.L03241.1	-0.44	0.2	GO:0005524	AT5G40010.1	AATP1	AAA-ATPase 1
Eucgr.J02148	Eucgr.J02148.1	-0.67	0.24	GO:0005524	AT5G40010.1	AATP1	AAA-ATPase 1
Eucgr.I01900	Eucgr.I01900.1	-1.1	-0.012	GO:0005524	AT5G40010.1	AATP1	AAA-ATPase 1
Eucgr.J02145	Eucgr.J02145.1	-2.2	-0.94	GO:0005524	AT5G40010.1	AATP1	AAA-ATPase 1
Eucgr.I01902	Eucgr.I01902.1	-2.3	-0.33	GO:0005524	AT5G40010.1	AATP1	AAA-ATPase 1
Eucgr.L00798	Eucgr.L00798.1	-3.8	-1.2	GO:0005524	AT5G40010.1	AATP1	AAA-ATPase 1
Eucgr.J02147	Eucgr.J02147.1	-3.9	-4.7	GO:0005524	AT5G40010.1	AATP1	AAA-ATPase 1
Eucgr.L01951	Eucgr.L01951.1	-4.4	-1.8	GO:0005524	AT5G40010.1	AATP1	AAA-ATPase 1
Eucgr.E03297	Eucgr.E03297.1	1.9	1.7	GO:0005524	AT4G04910.1	NSF	AAA-type ATPase family protein
Eucgr.E03298	Eucgr.E03298.1	1.2	1.4	GO:0005524	AT4G04910.1	NSF	AAA-type ATPase family protein
Eucgr.E03296	Eucgr.E03296.1	0.75	0.078	GO:0005524	AT4G04910.1	NSF	AAA-type ATPase family protein
Eucgr.D02441	Eucgr.D02441.1	0.48	0.033	GO:0009378,GO:0006310,GO:0006281	AT2G45500.1		AAA-type ATPase family protein
Eucgr.D02441	Eucgr.D02441.2	0.48	0.033	GO:0009378,GO:0006310,GO:0006281	AT2G45500.1		AAA-type ATPase family protein
Eucgr.I02432	Eucgr.I02432.1	0.28	0.017	GO:0005524	AT2G18330.1		AAA-type ATPase family protein
Eucgr.H01157	Eucgr.H01157.6	0.26	0.27		AT1G02890.1		AAA-type ATPase family protein
Eucgr.H01157	Eucgr.H01157.3	0.26	0.27	GO:0009378,GO:0006310,GO:0006281	AT4G02480.1		AAA-type ATPase family protein
Eucgr.H01157	Eucgr.H01157.4	0.26	0.27	GO:0009378,GO:0006310,GO:0006281	AT1G02890.1		AAA-type ATPase family protein
Eucgr.H01157	Eucgr.H01157.2	0.26	0.27	GO:0009378,GO:0006310,GO:0006281	AT1G02890.1		AAA-type ATPase family protein
Eucgr.H01157	Eucgr.H01157.1	0.26	0.27	GO:0009378,GO:0006310,GO:0006281	AT1G02890.1		AAA-type ATPase family protein
Eucgr.H01157	Eucgr.H01157.5	0.26	0.27	GO:0009378,GO:0006310,GO:0006281	AT4G02480.1		AAA-type ATPase family protein
Eucgr.A00951	Eucgr.A00951.1	0.2	-0.27	GO:0005524	AT1G24290.1		AAA-type ATPase family protein
Eucgr.F01600	Eucgr.F01600.1	0.17	-0.13	GO:0009378,GO:0006310,GO:0006281	AT1G45000.1		AAA-type ATPase family protein
Eucgr.H00817	Eucgr.H00817.1	0.14	-0.18	GO:0005524	AT2G20140.1		AAA-type ATPase family protein
Eucgr.E03103	Eucgr.E03103.1	0.097	0.17	GO:0005524	AT4G04910.1	NSF	AAA-type ATPase family protein
Eucgr.B03874	Eucgr.B03874.1	0.078	0.00081	GO:0016887,GO:0005524	AT2G27600.1	ATSKD1,SKD1,VPS4	AAA-type ATPase family protein
Eucgr.J00483	Eucgr.J00483.1	0.075	-0.037	GO:0005524	AT2G27600.1	ATSKD1,SKD1,VPS4	AAA-type ATPase family protein
Eucgr.E03294	Eucgr.E03294.1	-0.025	-0.21	GO:0005524	AT4G04910.1	NSF	AAA-type ATPase family protein
Eucgr.K02736	Eucgr.K02736.1	-0.032	0.013	GO:0009378,GO:0006310,GO:0006281,GO:0005515	AT4G02480.1		AAA-type ATPase family protein
Eucgr.K02736	Eucgr.K02736.2	-0.032	0.013	GO:0009378,GO:0006310,GO:0006281,GO:0005515	AT4G02480.1		AAA-type ATPase family protein
Eucgr.D02583	Eucgr.D02583.1	-0.12	-0.031	GO:0009378,GO:0006310,GO:0006281,GO:0006508,GO:0005524,GO:0004222	AT3G16290.1	EMB2083	AAA-type ATPase family protein
Eucgr.D02583	Eucgr.D02583.2	-0.12	-0.031	GO:0009378,GO:0006310,GO:0006281	AT3G16290.1	EMB2083	AAA-type ATPase family protein
Eucgr.H04960	Eucgr.H04960.1	-0.18	0.065	GO:0009378,GO:0006310,GO:0006281	AT5G64580.1		AAA-type ATPase family protein
Eucgr.H04960	Eucgr.H04960.2	-0.18	0.065	GO:0009378,GO:0006310,GO:0006281	AT5G64580.1		AAA-type ATPase family protein
Eucgr.H04960	Eucgr.H04960.4	-0.18	0.065	GO:0009378,GO:0006310,GO:0006281	AT5G64580.1		AAA-type ATPase family protein
Eucgr.H04960	Eucgr.H04960.5	-0.18	0.065	GO:0009378,GO:0006310,GO:0006281	AT5G64580.1		AAA-type ATPase family protein
Eucgr.H04960	Eucgr.H04960.3	-0.18	0.065	GO:0009378,GO:0006310,GO:0006281	AT5G64580.1		AAA-type ATPase family protein
Eucgr.E03102	Eucgr.E03102.1	-0.35	0.26		AT4G04910.1	NSF	AAA-type ATPase family protein
Eucgr.I02805	Eucgr.I02805.1	-0.87	-0.32	GO:0003887,GO:0005524	AT2G02480.1	STI	AAA-type ATPase family protein
Eucgr.D00435	Eucgr.D00435.1	-1.1	-0.24	GO:0003887	AT4G18820.1		AAA-type ATPase family protein
Eucgr.K02767	Eucgr.K02767.1	-1.5	-0.11		AT4G24790.2		AAA-type ATPase family protein
Eucgr.C01036	Eucgr.C01036.1	0.9	-0.53	GO:0005524	AT3G24530.1		AAA-type ATPase family protein / ankyrin repeat family protein
Eucgr.C01036	Eucgr.C01036.2	0.9	-0.53	GO:0005515,GO:0005524	AT3G24530.1		AAA-type ATPase family protein / ankyrin repeat family protein
Eucgr.F02817	Eucgr.F02817.1	0.68	0.15		AT1G66510.1		AAR2 protein family
Eucgr.F03084	Eucgr.F03084.1	0.3	0.39		AT1G51965.1	ABO5	ABA Overly-Sensitive 5
Eucgr.J00637	Eucgr.J00637.2	0.27	0.18	GO:0043565,GO:0006355,GO:0003700	AT3G56850.1	AREB3,DPBF3	ABA-responsive element binding protein 3
Eucgr.J00637	Eucgr.J00637.1	0.27	0.18	GO:0043565,GO:0006355,GO:0003700	AT3G56850.1	AREB3,DPBF3	ABA-responsive element binding protein 3
Eucgr.J00637	Eucgr.J00637.3	0.27	0.18	GO:0043565,GO:0006355,GO:0003700	AT3G56850.1	AREB3,DPBF3	ABA-responsive element binding protein 3
Eucgr.J00637	Eucgr.J00637.4	0.27	0.18	GO:0043565,GO:0006355,GO:0003700	AT3G56850.1	AREB3,DPBF3	ABA-responsive element binding protein 3
Eucgr.K01706	Eucgr.K01706.1	0.035	-0.14	GO:0043565,GO:0006355,GO:0003700	AT3G56850.1	AREB3,DPBF3	ABA-responsive element binding protein 3
Eucgr.J00320	Eucgr.J00320.1	-0.22	-0.25	GO:0043565,GO:0006355,GO:0003700	AT3G56850.1	AREB3,DPBF3	ABA-responsive element binding protein 3
Eucgr.A02171	Eucgr.A02171.1	-0.95	-0.72	GO:0043565,GO:0006355,GO:0003700	AT3G56850.1	AREB3,DPBF3	ABA-responsive element binding protein 3
Eucgr.A00993	Eucgr.A00993.1	1.3	0.24		AT4G01660.1	ABC1,ATABC1,ATATH10	ABC transporter 1
Eucgr.L02422	Eucgr.L02422.1	1.5	0.78	GO:0016887,GO:0005524,GO:0055085,GO:0042626,GO:0016021,GO:0006810	AT3G28345.1		ABC transporter family protein
Eucgr.F00982	Eucgr.F00982.1	1.1	-0.19	GO:0016301,GO:0005524,GO:0016887,GO:0055085,GO:0042626,GO:0016021,GO:0006810	AT3G28345.1		ABC transporter family protein
Eucgr.I01885	Eucgr.I01885.1	0.88	2.4	GO:0016887,GO:0005524,GO:0055085,GO:0042626,GO:0016021,GO:0006810	AT3G28345.1		ABC transporter family protein
Eucgr.H04964	Eucgr.H04964.3	0.68	-0.35	GO:0016887,GO:0005524	AT4G33460.1	ATNAP13,EMB2751	ABC transporter family protein
Eucgr.H04964	Eucgr.H04964.4	0.68	-0.35	GO:0016887,GO:0005524	AT4G33460.1	ATNAP13,EMB2751	ABC transporter family protein
Eucgr.H04964	Eucgr.H04964.2	0.68	-0.35	GO:0016887,GO:0005524	AT4G33460.1	ATNAP13,EMB2751	ABC transporter family protein
Eucgr.H04964	Eucgr.H04964.1	0.68	-0.35	GO:0016887,GO:0005524	AT4G33460.1	ATNAP13,EMB2751	ABC transporter family protein
Eucgr.I01894	Eucgr.I01894.1	0.61	-0.78	GO:0055085,GO:0042626,GO:0016021,GO:0006810,GO:0005524,GO:0016887	AT3G28345.1		ABC transporter family protein
Eucgr.J00895	Eucgr.J00895.1	0.58	-0.14	GO:0016887,GO:0005524	AT5G60790.1	ATGCN1,GCN1	ABC transporter family protein
Eucgr.L02334	Eucgr.L02334.1	0.53	-3.5	GO:0016887,GO:0005524,GO:0055085,GO:0042626,GO:0016021,GO:0006810	AT3G28345.1		ABC transporter family protein
Eucgr.B02530	Eucgr.B02530.1	0	6.4	GO:0016887,GO:0005524	AT5G60740.1		ABC transporter family protein
Eucgr.I01892	Eucgr.I01892.1	0	5.5	GO:0016887,GO:0005524,GO:0055085,GO:0042626,GO:0016021,GO:0006810	AT3G28345.1		ABC transporter family protein
Eucgr.F04488	Eucgr.F04488.1	-0.32	0.12	GO:0016887,GO:0005524,GO:0016021,GO:0006810,GO:0005215	AT1G54350.1		ABC transporter family protein
Eucgr.L01362	Eucgr.L01362.1	-0.4	0.93	GO:0016887,GO:0005524,GO:0055085,GO:0042626,GO:0016021,GO:0006810	AT3G28345.1		ABC transporter family protein
Eucgr.I01889	Eucgr.I01889.1	-0.72	-0.62	GO:0016887,GO:0005524,GO:0055085,GO:0042626,GO:0016021,GO:0006810	AT3G28345.1		ABC transporter family protein
Eucgr.C01000	Eucgr.C01000.1	-0.87	0.004	GO:0016887,GO:0005524,GO:0055085,GO:0042626,GO:0016021,GO:0006810	AT3G28345.1		ABC transporter family protein
Eucgr.C02210	Eucgr.C02210.1	-1	-1.8	GO:0055085,GO:0042626,GO:0016021,GO:0006810,GO:0005524,GO:0016887	AT3G28415.1		ABC transporter family protein
Eucgr.I01895	Eucgr.I01895.1	-1.2	0.78	GO:0055085,GO:0042626,GO:0016021,GO:0006810,GO:0005524,GO:0016887	AT3G28345.1		ABC transporter family protein
Eucgr.J02160	Eucgr.J02160.1	-1.6	0.045	GO:0016887,GO:0005524,GO:0055085,GO:0042626,GO:0016021,GO:0006810	AT3G28345.1		ABC transporter family protein
Eucgr.I01888	Eucgr.I01888.1	-1.8	1	GO:0016887,GO:0005524,GO:0055085,GO:0042626,GO:0016021,GO:0006810	AT3G28345.1		ABC transporter family protein
Eucgr.I01887	Eucgr.I01887.1	-2.1	-0.74	GO:0016887,GO:0005524,GO:0055085,GO:0042626,GO:0016021,GO:0006810	AT3G28345.1		ABC transporter family protein
Eucgr.I01893	Eucgr.I01893.1	-4.8	-2.5	GO:0016887,GO:0005524,GO:0055085,GO:0042626,GO:0016021,GO:0006810	AT3G28345.1		ABC transporter family protein
Eucgr.B04035	Eucgr.B04035.2	0.12	0.33	GO:0016887,GO:0005524,GO:0055085,GO:0042626,GO:0016021,GO:0006810	AT5G58270.1	ATATM3,ATM3,STA1	ABC transporter of the mitochondrion 3
Eucgr.B04035	Eucgr.B04035.1	0.12	0.33	GO:0016887,GO:0005524,GO:0055085,GO:0042626,GO:0016021,GO:0006810	AT5G58270.1	ATATM3,ATM3,STA1	ABC transporter of the mitochondrion 3
Eucgr.C03989	Eucgr.C03989.2	0.21	0.12		AT5G24810.2		ABC1 family protein
Eucgr.C03989	Eucgr.C03989.1	0.21	0.12		AT5G24810.1		ABC1 family protein
Eucgr.F03072	Eucgr.F03072.1	1.2	0.43	GO:0016887,GO:0005524,GO:0016020	AT1G59870.1	ABCG36,ATABCG36,ATPDR8,PDR8,PEN3	ABC-2 and Plant PDR ABC-type transporter family protein
Eucgr.F03072	Eucgr.F03072.2	1.2	0.43	GO:0016887,GO:0005524,GO:0016020	AT1G59870.1	ABCG36,ATABCG36,ATPDR8,PDR8,PEN3	ABC-2 and Plant PDR ABC-type transporter family protein
Eucgr.J02944	Eucgr.J02944.1	-0.85	-0.032	GO:0016887,GO:0005524,GO:0016020	AT1G59870.1	ABCG36,ATABCG36,ATPDR8,PDR8,PEN3	ABC-2 and Plant PDR ABC-type transporter family protein
Eucgr.L03286	Eucgr.L03286.1	-1.4	0.24	GO:0016020	AT1G59870.1	ABCG36,ATABCG36,ATPDR8,PDR8,PEN3	ABC-2 and Plant PDR ABC-type transporter family protein
Eucgr.J02941	Eucgr.J02941.1	-3.3	-0.3	GO:0016887,GO:0005524,GO:0016020	AT1G59870.1	ABCG36,ATABCG36,ATPDR8,PDR8,PEN3	ABC-2 and Plant PDR ABC-type transporter family protein
Eucgr.A02657	Eucgr.A02657.1	0.62	0.21	GO:0005524,GO:0055085,GO:0042626,GO:0016021,GO:0006810	AT5G03910.1	ATATH12,ATH12	ABC2 homolog 12
Eucgr.H04831	Eucgr.H04831.1	-0.17	0.023		AT5G64940.2	ATATH13,ATH13,ATOSA1,OSA1	ABC2 homolog 13
Eucgr.H04831	Eucgr.H04831.2	-0.17	0.023		AT5G64940.2	ATATH13,ATH13,ATOSA1,OSA1	ABC2 homolog 13
Eucgr.H04831	Eucgr.H04831.3	-0.17	0.023		AT5G64940.2	ATATH13,ATH13,ATOSA1,OSA1	ABC2 homolog 13
Eucgr.H04831	Eucgr.H04831.4	-0.17	0.023		AT5G64940.2	ATATH13,ATH13,ATOSA1,OSA1	ABC2 homolog 13
Eucgr.K02460	Eucgr.K02460.1	1.9	1.7	GO:0016887,GO:0005524,GO:0016021,GO:0006810,GO:0005215	AT3G47780.1	ATATH6,ATH6	ABC2 homolog 6
Eucgr.K02457	Eucgr.K02457.1	0.18	0.52	GO:0016887,GO:0005524,GO:0016021,GO:0006810,GO:0005215	AT3G47780.1	ATATH6,ATH6	ABC2 homolog 6
Eucgr.K02458	Eucgr.K02458.1	-0.68	0.31	GO:0016887,GO:0005524,GO:0016021,GO:0006810,GO:0005215	AT3G47780.1	ATATH6,ATH6	ABC2 homolog 6
Eucgr.J00216	Eucgr.J00216.1	1	0.29	GO:0006468,GO:0005524,GO:0004672	AT2G40090.1	ATATH9,ATH9	ABC2 homolog 9
Eucgr.J00216	Eucgr.J00216.2	1	0.29	GO:0006468,GO:0005524,GO:0004672	AT2G40090.1	ATATH9,ATH9	ABC2 homolog 9
Eucgr.J00216	Eucgr.J00216.3	1	0.29		AT2G40090.1	ATATH9,ATH9	ABC2 homolog 9
Eucgr.J00212	Eucgr.J00212.1	-1	-1.9		AT2G40090.1	ATATH9,ATH9	ABC2 homolog 9
Eucgr.J00337	Eucgr.J00337.1	5.3	0	GO:0016887,GO:0005524,GO:0016020	AT4G27420.1		ABC-2 type transporter family protein
Eucgr.G02773	Eucgr.G02773.1	2.1	-0.15	GO:0016887,GO:0005524,GO:0016020	AT5G13580.1		ABC-2 type transporter family protein
Eucgr.G02369	Eucgr.G02369.1	1.9	0.36	GO:0016887,GO:0005524,GO:0016020	AT3G25620.2		ABC-2 type transporter family protein
Eucgr.G02775	Eucgr.G02775.1	1.7	0.37	GO:0016887,GO:0005524,GO:0016020	AT3G55090.1		ABC-2 type transporter family protein
Eucgr.K01911	Eucgr.K01911.1	0.83	0.33	GO:0016887,GO:0005524,GO:0016020	AT5G06530.1		ABC-2 type transporter family protein
Eucgr.H02410	Eucgr.H02410.1	0.79	-0.13	GO:0016887,GO:0005524	AT3G55090.1		ABC-2 type transporter family protein
Eucgr.J00695	Eucgr.J00695.1	0.65	-0.085	GO:0016887,GO:0005524,GO:0016020	AT5G19410.1		ABC-2 type transporter family protein
Eucgr.F03258	Eucgr.F03258.1	0.57	-0.21	GO:0016887,GO:0005524,GO:0016020	AT1G53270.1		ABC-2 type transporter family protein
Eucgr.B02893	Eucgr.B02893.1	0.49	0.054	GO:0016887,GO:0005524,GO:0016020	AT2G01320.2		ABC-2 type transporter family protein
Eucgr.A01212	Eucgr.A01212.1	0.24	0.057	GO:0016887,GO:0005524,GO:0016020	AT2G37360.1		ABC-2 type transporter family protein
Eucgr.F03676	Eucgr.F03676.1	0	5.1	GO:0016887,GO:0005524,GO:0016020	AT3G13220.1	ABCG26,WBC27	ABC-2 type transporter family protein
Eucgr.I02044	Eucgr.I02044.1	0	0	GO:0016020	AT3G21090.1		ABC-2 type transporter family protein
Eucgr.K01734	Eucgr.K01734.1	0	4.1	GO:0016887,GO:0005524,GO:0016020	AT3G21090.1		ABC-2 type transporter family protein
Eucgr.B02536	Eucgr.B02536.1	-0.13	0.21	GO:0016887,GO:0005524,GO:0016020	AT2G28070.1		ABC-2 type transporter family protein
Eucgr.J00745	Eucgr.J00745.4	-0.72	0.75	GO:0016887,GO:0005524,GO:0016020	AT3G21090.1		ABC-2 type transporter family protein
Eucgr.J00745	Eucgr.J00745.5	-0.72	0.75	GO:0016887,GO:0005524,GO:0016020	AT3G21090.1		ABC-2 type transporter family protein
Eucgr.J00745	Eucgr.J00745.2	-0.72	0.75	GO:0016020,GO:0016887,GO:0005524	AT3G21090.1		ABC-2 type transporter family protein
Eucgr.J00745	Eucgr.J00745.3	-0.72	0.75	GO:0016020,GO:0016887,GO:0005524	AT3G21090.1		ABC-2 type transporter family protein
Eucgr.J00745	Eucgr.J00745.1	-0.72	0.75	GO:0016887,GO:0005524,GO:0016020	AT3G21090.1		ABC-2 type transporter family protein
Eucgr.I00190	Eucgr.I00190.1	-1.1	0.38	GO:0016887,GO:0005524,GO:0016020	AT2G13610.1		ABC-2 type transporter family protein
Eucgr.I00190	Eucgr.I00190.2	-1.1	0.38	GO:0016887,GO:0005524,GO:0016020	AT2G13610.1		ABC-2 type transporter family protein
Eucgr.H00535	Eucgr.H00535.1	-1.3	-0.44	GO:0016887,GO:0005524,GO:0016020	AT2G37360.1		ABC-2 type transporter family protein
Eucgr.A02688	Eucgr.A02688.1	-1.8	-0.36	GO:0016887,GO:0005524	AT5G52860.1		ABC-2 type transporter family protein
Eucgr.K01723	Eucgr.K01723.1	-2	-2.8	GO:0016887,GO:0005524,GO:0016020	AT3G21090.1		ABC-2 type transporter family protein
Eucgr.G02776	Eucgr.G02776.1	-2.1	-0.27	GO:0016887,GO:0005524,GO:0016020	AT5G13580.1		ABC-2 type transporter family protein
Eucgr.J00746	Eucgr.J00746.1	-3.7	-1.4	GO:0016887,GO:0005524,GO:0016020	AT3G21090.1		ABC-2 type transporter family protein
Eucgr.C01685	Eucgr.C01685.1	0.32	-0.1		AT5G11030.2	ALF4	aberrant lateral root formation 4
Eucgr.B03147	Eucgr.B03147.1	2.8	0.37	GO:0007165	AT1G13740.1	AFP2	ABI five binding protein 2
Eucgr.G02444	Eucgr.G02444.1	0.15	0.071	GO:0007165	AT1G13740.1	AFP2	ABI five binding protein 2
Eucgr.D02333	Eucgr.D02333.1	-0.29	-0.023		AT2G46225.1	ABIL1	ABI-1-like 1
Eucgr.D02333	Eucgr.D02333.2	-0.29	-0.023		AT2G46225.1	ABIL1	ABI-1-like 1
Eucgr.C01259	Eucgr.C01259.3	-0.93	0.084		AT2G46225.3	ABIL1	ABI-1-like 1
Eucgr.C01259	Eucgr.C01259.2	-0.93	0.084		AT2G46225.3	ABIL1	ABI-1-like 1
Eucgr.H04324	Eucgr.H04324.1	0.31	-0.065	GO:0051082,GO:0016272,GO:0006457	AT1G08780.1	AIP3,PFD4	ABI3-interacting protein 3
Eucgr.K00391	Eucgr.K00391.4	-0.76	0.0037		AT3G49290.2	ABIL2	ABL interactor-like protein 2
Eucgr.E00962	Eucgr.E00962.1	-1.1	-1.9		AT3G49290.1	ABIL2	ABL interactor-like protein 2
Eucgr.E00723	Eucgr.E00723.1	-2	-2.8		AT3G49290.1	ABIL2	ABL interactor-like protein 2
Eucgr.E00955	Eucgr.E00955.1	6.3	0		AT5G24310.2	ABIL3	ABL interactor-like protein 3
Eucgr.E01020	Eucgr.E01020.1	0.5	1.4		AT5G24310.1	ABIL3	ABL interactor-like protein 3
Eucgr.E00893	Eucgr.E00893.2	0	0		AT5G24310.1	ABIL3	ABL interactor-like protein 3
Eucgr.E00893	Eucgr.E00893.1	0	0		AT5G24310.1	ABIL3	ABL interactor-like protein 3
Eucgr.E00910	Eucgr.E00910.1	0	0		AT5G24310.1	ABIL3	ABL interactor-like protein 3
Eucgr.E01014	Eucgr.E01014.1	0	0		AT5G24310.1	ABIL3	ABL interactor-like protein 3
Eucgr.K00391	Eucgr.K00391.2	-0.76	0.0037		AT5G24310.1	ABIL3	ABL interactor-like protein 3
Eucgr.K00391	Eucgr.K00391.3	-0.76	0.0037		AT5G24310.1	ABIL3	ABL interactor-like protein 3
Eucgr.K00391	Eucgr.K00391.1	-0.76	0.0037		AT5G24310.1	ABIL3	ABL interactor-like protein 3
Eucgr.C01259	Eucgr.C01259.1	-0.93	0.084		AT5G42030.1	ABIL4	ABL interactor-like protein 4
Eucgr.F02496	Eucgr.F02496.1	0.21	0.18		AT1G67080.1	ABA4	abscisic acid (aba)-deficient 4
Eucgr.F02496	Eucgr.F02496.4	0.21	0.18		AT1G67080.1	ABA4	abscisic acid (aba)-deficient 4
Eucgr.F02496	Eucgr.F02496.3	0.21	0.18		AT1G67080.1	ABA4	abscisic acid (aba)-deficient 4
Eucgr.F02496	Eucgr.F02496.2	0.21	0.18		AT1G67080.1	ABA4	abscisic acid (aba)-deficient 4
Eucgr.F02495	Eucgr.F02495.1	-0.38	0.53		AT1G67080.1	ABA4	abscisic acid (aba)-deficient 4
Eucgr.F02337	Eucgr.F02337.2	1.6	0.57	GO:0043565,GO:0006355,GO:0003700	AT1G45249.1	ABF2,AREB1,ATAREB1	abscisic acid responsive elements-binding factor 2
Eucgr.F02337	Eucgr.F02337.1	1.6	0.57	GO:0043565,GO:0006355,GO:0003700	AT1G45249.1	ABF2,AREB1,ATAREB1	abscisic acid responsive elements-binding factor 2
Eucgr.F02337	Eucgr.F02337.3	1.6	0.57	GO:0043565,GO:0006355,GO:0003700	AT1G45249.1	ABF2,AREB1,ATAREB1	abscisic acid responsive elements-binding factor 2
Eucgr.F02337	Eucgr.F02337.4	1.6	0.57	GO:0043565,GO:0006355,GO:0003700	AT1G45249.1	ABF2,AREB1,ATAREB1	abscisic acid responsive elements-binding factor 2
Eucgr.I01145	Eucgr.I01145.1	0.069	0.019	GO:0043565,GO:0006355,GO:0003700	AT4G34000.1	ABF3,DPBF5	abscisic acid responsive elements-binding factor 3
Eucgr.G01436	Eucgr.G01436.2	-0.019	0.45	GO:0043565,GO:0006355,GO:0003700	AT4G34000.1	ABF3,DPBF5	abscisic acid responsive elements-binding factor 3
Eucgr.G01436	Eucgr.G01436.1	-0.019	0.45	GO:0043565,GO:0006355,GO:0003700	AT4G34000.1	ABF3,DPBF5	abscisic acid responsive elements-binding factor 3
Eucgr.F00600	Eucgr.F00600.2	-0.084	0.25		AT5G42560.1		Abscisic acid-responsive (TB2/DP1, HVA22) family protein
Eucgr.F00600	Eucgr.F00600.1	-0.084	0.25		AT5G42560.1		Abscisic acid-responsive (TB2/DP1, HVA22) family protein
Eucgr.K02605	Eucgr.K02605.2	-0.097	0.063		AT5G42560.1		Abscisic acid-responsive (TB2/DP1, HVA22) family protein
Eucgr.K02605	Eucgr.K02605.1	-0.097	0.063		AT5G42560.1		Abscisic acid-responsive (TB2/DP1, HVA22) family protein
Eucgr.J00610	Eucgr.J00610.1	-0.14	0.084	GO:0051536,GO:0009055,GO:0055114,GO:0046872,GO:0016491	AT2G27150.1	AAO3,AOdelta,At-AO3,AtAAO3	abscisic aldehyde oxidase 3
Eucgr.C03886	Eucgr.C03886.1	-1.9	-0.92	GO:0055114,GO:0016491	AT2G19590.1	ACO1,ATACO1	ACC oxidase 1
Eucgr.C00906	Eucgr.C00906.1	-2.2	-0.52	GO:0055114,GO:0016491	AT2G19590.1	ACO1,ATACO1	ACC oxidase 1
Eucgr.L03358	Eucgr.L03358.1	-0.085	0.51	GO:0055114,GO:0016491	AT1G62380.1	ACO2,ATACO2	ACC oxidase 2
Eucgr.D01817	Eucgr.D01817.1	1.2	-0.14	GO:0030170,GO:0009058	AT3G61510.1	ACS1,AT-ACS1	ACC synthase 1
Eucgr.L02435	Eucgr.L02435.1	0.36	-0.25	GO:0030170,GO:0009058	AT3G61510.1	ACS1,AT-ACS1	ACC synthase 1
Eucgr.L02436	Eucgr.L02436.1	-0.8	-0.99	GO:0030170,GO:0009058	AT3G61510.1	ACS1,AT-ACS1	ACC synthase 1
Eucgr.L01617	Eucgr.L01617.1	-1.4	-0.52	GO:0030170,GO:0009058	AT3G61510.1	ACS1,AT-ACS1	ACC synthase 1
Eucgr.D01814	Eucgr.D01814.1	-1.5	-0.72	GO:0030170,GO:0009058	AT3G61510.1	ACS1,AT-ACS1	ACC synthase 1
Eucgr.D01815	Eucgr.D01815.1	-1.5	-0.59	GO:0030170,GO:0009058	AT3G61510.1	ACS1,AT-ACS1	ACC synthase 1
Eucgr.D01961	Eucgr.D01961.1	0.36	-0.18	GO:0030170,GO:0009058	AT1G62960.1	ACS10	ACC synthase 10
Eucgr.I00930	Eucgr.I00930.1	0.12	-0.094		AT4G37000.1	ACD2,ATRCCR	accelerated cell death 2 (ACD2)
Eucgr.F02481	Eucgr.F02481.4	0.3	-0.19		AT5G38660.1	APE1	acclimation of photosynthesis to environment
Eucgr.F02481	Eucgr.F02481.1	0.3	-0.19		AT5G38660.1	APE1	acclimation of photosynthesis to environment
Eucgr.F02481	Eucgr.F02481.2	0.3	-0.19		AT5G38660.2	APE1	acclimation of photosynthesis to environment
Eucgr.F02481	Eucgr.F02481.3	0.3	-0.19		AT5G38660.1	APE1	acclimation of photosynthesis to environment
Eucgr.J01823	Eucgr.J01823.1	-0.23	-0.17	GO:0055114,GO:0051537,GO:0016491,GO:0010277	AT4G25650.1	ACD1-LIKE,PTC52,TIC55-IV	ACD1-like
Eucgr.J01823	Eucgr.J01823.2	-0.23	-0.17	GO:0055114,GO:0051537,GO:0016491,GO:0010277	AT4G25650.1	ACD1-LIKE,PTC52,TIC55-IV	ACD1-like
Eucgr.J01727	Eucgr.J01727.1	-0.36	0.18		AT4G25650.2	ACD1-LIKE,PTC52,TIC55-IV	ACD1-like
Eucgr.J01820	Eucgr.J01820.1	-5.3	0.2	GO:0055114,GO:0010277	AT4G25650.1	ACD1-LIKE,PTC52,TIC55-IV	ACD1-like
Eucgr.H02295	Eucgr.H02295.3	-1.4	-0.076	GO:0016811	AT4G37560.1		Acetamidase/Formamidase family protein
Eucgr.H02295	Eucgr.H02295.2	-1.4	-0.076	GO:0016811	AT4G37560.1		Acetamidase/Formamidase family protein
Eucgr.H02295	Eucgr.H02295.1	-1.4	-0.076	GO:0016811	AT4G37560.1		Acetamidase/Formamidase family protein
Eucgr.C02177	Eucgr.C02177.2	-0.35	-0.11		AT5G35360.1	CAC2	acetyl Co-enzyme a carboxylase biotin carboxylase subunit
Eucgr.C02177	Eucgr.C02177.1	-0.35	-0.11		AT5G35360.1	CAC2	acetyl Co-enzyme a carboxylase biotin carboxylase subunit
Eucgr.D02269	Eucgr.D02269.1	0.71	0.27		AT2G38040.1	CAC3	acetyl Co-enzyme a carboxylase carboxyltransferase alpha subunit
Eucgr.B02769	Eucgr.B02769.1	0.081	-0.093		AT2G38040.2	CAC3	acetyl Co-enzyme a carboxylase carboxyltransferase alpha subunit
Eucgr.B02770	Eucgr.B02770.1	-0.1	-0.17		AT2G38040.1	CAC3	acetyl Co-enzyme a carboxylase carboxyltransferase alpha subunit
Eucgr.F00484	Eucgr.F00484.1	-0.0086	0.016	GO:0006633,GO:0005524,GO:0003989	AT1G36160.1	ACC1,AT-ACC1,EMB22,GK,PAS3	acetyl-CoA carboxylase 1
Eucgr.E02609	Eucgr.E02609.1	1.1	0.83		ATCG00500.1		acetyl-CoA carboxylase carboxyl transferase subunit beta
Eucgr.G01905	Eucgr.G01905.1	-0.35	0.068	GO:0008152,GO:0003824	AT5G36880.2	ACS	acetyl-CoA synthetase
Eucgr.E00052	Eucgr.E00052.1	0.75	-0.43		AT3G61770.1		Acid phosphatase/vanadium-dependent haloperoxidase-related protein
Eucgr.H04664	Eucgr.H04664.1	0.57	0.28		AT1G67600.1		Acid phosphatase/vanadium-dependent haloperoxidase-related protein
Eucgr.F03490	Eucgr.F03490.3	0.067	0.017		AT3G21610.1		Acid phosphatase/vanadium-dependent haloperoxidase-related protein
Eucgr.F03490	Eucgr.F03490.1	0.067	0.017		AT3G21610.1		Acid phosphatase/vanadium-dependent haloperoxidase-related protein
Eucgr.F03490	Eucgr.F03490.2	0.067	0.017		AT3G21610.1		Acid phosphatase/vanadium-dependent haloperoxidase-related protein
Eucgr.F04484	Eucgr.F04484.1	0.057	-0.15		AT3G12685.1		Acid phosphatase/vanadium-dependent haloperoxidase-related protein
Eucgr.D02377	Eucgr.D02377.1	0.036	-0.043		AT3G61770.1		Acid phosphatase/vanadium-dependent haloperoxidase-related protein
Eucgr.D01840	Eucgr.D01840.1	0.14	0.3	GO:0009058,GO:0005524,GO:0016874	AT1G63680.1	ATMURE,MURE,PDE316	acid-amino acid ligases;ligases;ATP binding;ATP binding;ligases
Eucgr.H03413	Eucgr.H03413.1	-2	-0.24	GO:0055114,GO:0010309	AT2G26400.1	ARD,ARD3,ATARD3	acireductone dioxygenase 3
Eucgr.J02488	Eucgr.J02488.1	1.3	-6.8	GO:0008152	AT4G35830.1	ACO1	aconitase 1
Eucgr.I02307	Eucgr.I02307.3	-0.22	0.2	GO:0008152	AT4G35830.2	ACO1	aconitase 1
Eucgr.I02307	Eucgr.I02307.2	-0.22	0.2	GO:0008152	AT4G35830.1	ACO1	aconitase 1
Eucgr.I02307	Eucgr.I02307.1	-0.22	0.2	GO:0008152	AT4G35830.1	ACO1	aconitase 1
Eucgr.C03206	Eucgr.C03206.1	-0.64	0.25	GO:0008152	AT4G35830.2	ACO1	aconitase 1
Eucgr.A01126	Eucgr.A01126.1	-3.9	-8	GO:0008152	AT4G35830.1	ACO1	aconitase 1
Eucgr.A01127	Eucgr.A01127.2	-0.084	-2.3	GO:0008152	AT2G05710.1	ACO3	aconitase 3
Eucgr.A01127	Eucgr.A01127.1	-0.084	-2.3	GO:0008152	AT2G05710.1	ACO3	aconitase 3
Eucgr.A01129	Eucgr.A01129.2	-0.23	-0.092	GO:0008152	AT2G05710.1	ACO3	aconitase 3
Eucgr.A01129	Eucgr.A01129.1	-0.23	-0.092	GO:0008152	AT2G05710.1	ACO3	aconitase 3
Eucgr.H02320	Eucgr.H02320.1	0.72	0.51	GO:0016597,GO:0008152	AT5G65890.1	ACR1	ACT domain repeat 1
Eucgr.F02763	Eucgr.F02763.1	-1.4	-0.38	GO:0016597,GO:0008152	AT1G76990.2	ACR3	ACT domain repeat 3
Eucgr.G02423	Eucgr.G02423.1	0.77	0.18	GO:0016597,GO:0008152	AT1G69040.2	ACR4	ACT domain repeat 4
Eucgr.H04608	Eucgr.H04608.1	0.15	0.77	GO:0016597,GO:0008152	AT1G69040.2	ACR4	ACT domain repeat 4
Eucgr.H04608	Eucgr.H04608.2	0.15	0.77	GO:0016597,GO:0008152	AT1G69040.2	ACR4	ACT domain repeat 4
Eucgr.I01627	Eucgr.I01627.1	0.63	0.14	GO:0016597,GO:0008152	AT3G01990.1	ACR6	ACT domain repeat 6
Eucgr.I01627	Eucgr.I01627.2	0.63	0.14	GO:0016597,GO:0008152	AT3G01990.1	ACR6	ACT domain repeat 6
Eucgr.I01627	Eucgr.I01627.3	0.63	0.14	GO:0016597,GO:0008152	AT3G01990.1	ACR6	ACT domain repeat 6
Eucgr.I01627	Eucgr.I01627.4	0.63	0.14	GO:0016597,GO:0008152	AT3G01990.1	ACR6	ACT domain repeat 6
Eucgr.H03350	Eucgr.H03350.1	-0.36	-0.29	GO:0016597,GO:0008152	AT3G01990.1	ACR6	ACT domain repeat 6
Eucgr.D01973	Eucgr.D01973.1	0.28	0.18	GO:0016597,GO:0008152	AT1G12420.1	ACR8	ACT domain repeat 8
Eucgr.E00487	Eucgr.E00487.1	0.015	0.24	GO:0016597,GO:0008152	AT1G12420.1	ACR8	ACT domain repeat 8
Eucgr.B02387	Eucgr.B02387.3	-0.28	-0.052		AT2G39570.1		ACT domain-containing protein
Eucgr.B02387	Eucgr.B02387.1	-0.28	-0.052		AT2G39570.1		ACT domain-containing protein
Eucgr.B02387	Eucgr.B02387.2	-0.28	-0.052		AT2G39570.1		ACT domain-containing protein
Eucgr.J00982	Eucgr.J00982.3	-0.28	-0.017		AT5G04740.1		ACT domain-containing protein
Eucgr.J00982	Eucgr.J00982.2	-0.28	-0.017		AT5G04740.1		ACT domain-containing protein
Eucgr.J00982	Eucgr.J00982.1	-0.28	-0.017		AT5G04740.1		ACT domain-containing protein
Eucgr.L00052	Eucgr.L00052.1	-0.16	0.31		AT2G31810.1		ACT domain-containing small subunit of acetolactate synthase protein
Eucgr.L00052	Eucgr.L00052.3	-0.16	0.31		AT2G31810.1		ACT domain-containing small subunit of acetolactate synthase protein
Eucgr.L00052	Eucgr.L00052.2	-0.16	0.31		AT2G31810.1		ACT domain-containing small subunit of acetolactate synthase protein
Eucgr.H01869	Eucgr.H01869.3	-0.23	-0.54		AT2G31810.1		ACT domain-containing small subunit of acetolactate synthase protein
Eucgr.H01869	Eucgr.H01869.1	-0.23	-0.54	GO:0016597,GO:0008152	AT2G31810.1		ACT domain-containing small subunit of acetolactate synthase protein
Eucgr.H01869	Eucgr.H01869.2	-0.23	-0.54	GO:0016597,GO:0008152	AT2G31810.1		ACT domain-containing small subunit of acetolactate synthase protein
Eucgr.K01841	Eucgr.K01841.1	-1.3	-0.78		AT2G37620.2	AAc1,ACT1	actin 1
Eucgr.G02932	Eucgr.G02932.1	-0.86	-0.41		AT3G53750.1	ACT3	actin 3
Eucgr.I02702	Eucgr.I02702.2	1.2	0.1		AT5G09810.1	ACT7	actin 7
Eucgr.I02702	Eucgr.I02702.1	1.2	0.1		AT5G09810.1	ACT7	actin 7
Eucgr.I00240	Eucgr.I00240.1	-0.5	-0.41		AT5G09810.1	ACT7	actin 7
Eucgr.D02537	Eucgr.D02537.1	-0.71	-0.21		AT5G09810.1	ACT7	actin 7
Eucgr.D02537	Eucgr.D02537.2	-0.71	-0.21		AT5G09810.1	ACT7	actin 7
Eucgr.I00241	Eucgr.I00241.1	-0.95	-0.46		AT5G09810.1	ACT7	actin 7
Eucgr.E01137	Eucgr.E01137.1	-4.4	-5.2		AT5G09810.1	ACT7	actin 7
Eucgr.B00549	Eucgr.B00549.1	0.39	0.23	GO:0045010,GO:0005884	AT5G07740.1		actin binding
Eucgr.C02573	Eucgr.C02573.1	-0.093	1.5		AT5G07740.1		actin binding
Eucgr.B00550	Eucgr.B00550.1	-0.34	0.21	GO:0045010,GO:0005884	AT5G07740.1		actin binding
Eucgr.K02088	Eucgr.K02088.1	-1.2	0.11	GO:0005515	AT5G48460.1		Actin binding Calponin homology (CH) domain-containing protein
Eucgr.K02088	Eucgr.K02088.2	-1.2	0.11	GO:0005515	AT5G48460.1		Actin binding Calponin homology (CH) domain-containing protein
Eucgr.F03088	Eucgr.F03088.1	0.56	-0.004		AT1G52080.1	AR791	actin binding protein family
Eucgr.B02585	Eucgr.B02585.2	1.1	0.16		AT1G27100.1		Actin cross-linking protein
Eucgr.B02585	Eucgr.B02585.1	1.1	0.16		AT1G27100.1		Actin cross-linking protein
Eucgr.J02139	Eucgr.J02139.1	-0.061	0.14		AT1G27100.1		Actin cross-linking protein
Eucgr.J02139	Eucgr.J02139.2	-0.061	0.14		AT1G27100.1		Actin cross-linking protein
Eucgr.B03401	Eucgr.B03401.1	-1.2	0.046		AT1G27100.1		Actin cross-linking protein
Eucgr.J00048	Eucgr.J00048.3	-0.14	-0.43	GO:0005622,GO:0003779,GO:0030042,GO:0015629	AT5G59890.1	ADF4,ATADF4	actin depolymerizing factor 4
Eucgr.J00048	Eucgr.J00048.6	-0.14	-0.43	GO:0005622,GO:0003779,GO:0030042,GO:0015629	AT5G59890.1	ADF4,ATADF4	actin depolymerizing factor 4
Eucgr.J00048	Eucgr.J00048.5	-0.14	-0.43	GO:0005622,GO:0003779,GO:0030042,GO:0015629	AT5G59890.1	ADF4,ATADF4	actin depolymerizing factor 4
Eucgr.J00048	Eucgr.J00048.2	-0.14	-0.43	GO:0005622,GO:0003779,GO:0030042,GO:0015629	AT5G59890.1	ADF4,ATADF4	actin depolymerizing factor 4
Eucgr.J00048	Eucgr.J00048.1	-0.14	-0.43	GO:0005622,GO:0003779,GO:0030042,GO:0015629	AT5G59890.1	ADF4,ATADF4	actin depolymerizing factor 4
Eucgr.J00048	Eucgr.J00048.4	-0.14	-0.43	GO:0005622,GO:0003779,GO:0030042,GO:0015629	AT5G59890.1	ADF4,ATADF4	actin depolymerizing factor 4
Eucgr.A01245	Eucgr.A01245.1	-0.33	-0.31	GO:0005622,GO:0003779,GO:0030042,GO:0015629	AT5G59890.1	ADF4,ATADF4	actin depolymerizing factor 4
Eucgr.A01245	Eucgr.A01245.4	-0.33	-0.31	GO:0005622,GO:0003779,GO:0030042,GO:0015629	AT5G59890.1	ADF4,ATADF4	actin depolymerizing factor 4
Eucgr.A01245	Eucgr.A01245.2	-0.33	-0.31	GO:0005622,GO:0003779,GO:0030042,GO:0015629	AT5G59890.1	ADF4,ATADF4	actin depolymerizing factor 4
Eucgr.A01245	Eucgr.A01245.3	-0.33	-0.31	GO:0005622,GO:0003779,GO:0030042,GO:0015629	AT5G59890.1	ADF4,ATADF4	actin depolymerizing factor 4
Eucgr.I01401	Eucgr.I01401.1	-0.51	-0.0017	GO:0005622,GO:0003779,GO:0030042,GO:0015629	AT2G16700.1	ADF5,ATADF5	actin depolymerizing factor 5
Eucgr.K03264	Eucgr.K03264.2	0.19	-0.078	GO:0005622,GO:0003779,GO:0030042,GO:0015629	AT2G31200.1	ADF6,ATADF6	actin depolymerizing factor 6
Eucgr.K03264	Eucgr.K03264.1	0.19	-0.078	GO:0005622,GO:0003779,GO:0030042,GO:0015629	AT2G31200.1	ADF6,ATADF6	actin depolymerizing factor 6
Eucgr.H03058	Eucgr.H03058.1	-0.24	-0.19	GO:0005622,GO:0003779,GO:0030042,GO:0015629	AT2G31200.1	ADF6,ATADF6	actin depolymerizing factor 6
Eucgr.K00262	Eucgr.K00262.1	-3	-0.76	GO:0005622,GO:0003779,GO:0030042,GO:0015629	AT4G25590.1	ADF7	actin depolymerizing factor 7
Eucgr.L01612	Eucgr.L01612.1	-5.6	-1.3	GO:0005622,GO:0003779,GO:0030042,GO:0015629	AT4G25590.1	ADF7	actin depolymerizing factor 7
Eucgr.D02275	Eucgr.D02275.1	-5.6	-2.4	GO:0005622,GO:0003779,GO:0030042,GO:0015629	AT4G00680.1	ADF8	actin depolymerizing factor 8
Eucgr.H03353	Eucgr.H03353.1	-0.1	0.39	GO:0034314,GO:0007015,GO:0005885,GO:0005856,GO:0005524	AT3G27000.1	ARP2,ATARP2,WRM	actin related protein 2
Eucgr.J00015	Eucgr.J00015.2	-0.93	-0.73		AT3G12110.1	ACT11	actin-11
Eucgr.J00015	Eucgr.J00015.1	-0.93	-0.73		AT3G12110.1	ACT11	actin-11
Eucgr.B01920	Eucgr.B01920.1	1.1	0.49		AT3G05470.1		Actin-binding FH2 (formin homology 2) family protein
Eucgr.L02129	Eucgr.L02129.1	0.66	0.66		AT3G05470.1		Actin-binding FH2 (formin homology 2) family protein
Eucgr.B01924	Eucgr.B01924.1	-1	-1.8		AT3G05470.1		Actin-binding FH2 (formin homology 2) family protein
Eucgr.B02572	Eucgr.B02572.1	-1.4	-0.5		AT1G59910.1		Actin-binding FH2 (formin homology 2) family protein
Eucgr.C01935	Eucgr.C01935.1	2.1	3.8	GO:0045010,GO:0005884	AT2G25050.2		Actin-binding FH2 (Formin Homology) protein
Eucgr.C01939	Eucgr.C01939.1	0.39	0.35		AT2G25050.1		Actin-binding FH2 (Formin Homology) protein
Eucgr.C01939	Eucgr.C01939.2	0.39	0.35		AT2G25050.1		Actin-binding FH2 (Formin Homology) protein
Eucgr.C02574	Eucgr.C02574.1	0.04	0.17		AT2G25050.2		Actin-binding FH2 (Formin Homology) protein
Eucgr.C01936	Eucgr.C01936.1	-3.4	2.8		AT2G25050.2		Actin-binding FH2 (Formin Homology) protein
Eucgr.H02449	Eucgr.H02449.1	0.56	0.28	GO:0034314,GO:0007015,GO:0005885,GO:0005524	AT1G13180.1	ARP3,ATARP3,DIS1	Actin-like ATPase superfamily protein
Eucgr.H02449	Eucgr.H02449.2	0.56	0.28	GO:0034314,GO:0007015,GO:0005885,GO:0005524	AT1G13180.1	ARP3,ATARP3,DIS1	Actin-like ATPase superfamily protein
Eucgr.A00092	Eucgr.A00092.1	0.53	-0.23		AT4G22720.1		Actin-like ATPase superfamily protein
Eucgr.L00050	Eucgr.L00050.1	0.33	-0.026		AT4G22720.1		Actin-like ATPase superfamily protein
Eucgr.A00283	Eucgr.A00283.1	0.23	0.18		AT4G22720.2		Actin-like ATPase superfamily protein
Eucgr.F03908	Eucgr.F03908.1	0.083	0.18	GO:0016773,GO:0005975	AT1G80460.1	GLI1,NHO1	Actin-like ATPase superfamily protein
Eucgr.H01866	Eucgr.H01866.1	-0.058	-0.036		AT4G22720.1		Actin-like ATPase superfamily protein
Eucgr.J03080	Eucgr.J03080.2	-0.063	-0.29	GO:0016773,GO:0005975	AT1G80460.1	GLI1,NHO1	Actin-like ATPase superfamily protein
Eucgr.J03080	Eucgr.J03080.1	-0.063	-0.29	GO:0016773,GO:0005975	AT1G80460.1	GLI1,NHO1	Actin-like ATPase superfamily protein
Eucgr.A00888	Eucgr.A00888.2	-0.64	-0.015		AT1G30540.1		Actin-like ATPase superfamily protein
Eucgr.A00888	Eucgr.A00888.1	-0.64	-0.015		AT1G30540.1		Actin-like ATPase superfamily protein
Eucgr.B00704	Eucgr.B00704.1	-0.072	-0.045		AT1G18450.1	ARP4,ATARP4	actin-related protein 4
Eucgr.J01241	Eucgr.J01241.1	-0.15	0.19	GO:0031011,GO:0006355,GO:0006281	AT3G12380.1	ARP5,ATARP5	actin-related protein 5
Eucgr.C04260	Eucgr.C04260.1	0.52	0.45	GO:0035267,GO:0031011,GO:0006355,GO:0006338,GO:0006281	AT3G33520.1	ARP6,ATARP6,ESD1,SUF3	actin-related protein 6
Eucgr.G03371	Eucgr.G03371.1	-0.23	-0.31		AT3G60830.1	ARP7,ATARP7	actin-related protein 7
Eucgr.F01992	Eucgr.F01992.2	-0.0018	0.0018	GO:0005515	AT5G56180.1	ARP8,ATARP8	actin-related protein 8
Eucgr.F01992	Eucgr.F01992.1	-0.0018	0.0018	GO:0005515	AT5G56180.1	ARP8,ATARP8	actin-related protein 8
Eucgr.F01992	Eucgr.F01992.3	-0.0018	0.0018	GO:0005515	AT5G56180.1	ARP8,ATARP8	actin-related protein 8
Eucgr.H03137	Eucgr.H03137.1	-0.21	0.26	GO:0031011,GO:0006338	AT5G43500.2	ARP9,ATARP9	actin-related protein 9
Eucgr.H03129	Eucgr.H03129.1	-0.91	0.031		AT5G43500.1	ARP9,ATARP9	actin-related protein 9
Eucgr.K01189	Eucgr.K01189.3	0.46	0.25	GO:0034314,GO:0030833,GO:0015629,GO:0005885	AT2G31300.1	ARPC1,ARPC1B	actin-related protein C1B
Eucgr.K01189	Eucgr.K01189.1	0.46	0.25	GO:0034314,GO:0030833,GO:0015629,GO:0005885	AT2G31300.1	ARPC1,ARPC1B	actin-related protein C1B
Eucgr.K01189	Eucgr.K01189.2	0.46	0.25	GO:0034314,GO:0030833,GO:0015629,GO:0005885	AT2G31300.1	ARPC1,ARPC1B	actin-related protein C1B
Eucgr.H00135	Eucgr.H00135.3	0.072	0.63	GO:0034314,GO:0030833,GO:0015629,GO:0005885	AT2G33385.2	arpc2b	actin-related protein C2B
Eucgr.H00135	Eucgr.H00135.2	0.072	0.63	GO:0034314,GO:0030833,GO:0015629,GO:0005885	AT2G33385.2	arpc2b	actin-related protein C2B
Eucgr.H00135	Eucgr.H00135.1	0.072	0.63	GO:0034314,GO:0030833,GO:0015629,GO:0005885	AT2G33385.2	arpc2b	actin-related protein C2B
Eucgr.C04376	Eucgr.C04376.2	0.042	-0.24	GO:0034314,GO:0030833,GO:0005885,GO:0005856	AT1G60430.1	ARPC3	actin-related protein C3
Eucgr.C04376	Eucgr.C04376.1	0.042	-0.24	GO:0034314,GO:0030833,GO:0005885,GO:0005856	AT1G60430.2	ARPC3	actin-related protein C3
Eucgr.I02126	Eucgr.I02126.1	0	6.2	GO:0034314,GO:0030833,GO:0005885,GO:0005856	AT1G60430.2	ARPC3	actin-related protein C3
Eucgr.F01466	Eucgr.F01466.1	0	4.1	GO:0005515	AT3G12890.1	ASML2	activator of spomin::LUC2
Eucgr.I01464	Eucgr.I01464.1	0.28	0.13	GO:0006468,GO:0004672	AT4G38470.1		ACT-like protein tyrosine kinase family protein
Eucgr.F02717	Eucgr.F02717.1	-0.15	0.13	GO:0006468,GO:0004672	AT4G38470.1		ACT-like protein tyrosine kinase family protein
Eucgr.F02717	Eucgr.F02717.3	-0.15	0.13	GO:0006468,GO:0004672	AT2G17700.1		ACT-like protein tyrosine kinase family protein
Eucgr.F02717	Eucgr.F02717.2	-0.15	0.13	GO:0006468,GO:0004672	AT2G17700.1		ACT-like protein tyrosine kinase family protein
Eucgr.G01804	Eucgr.G01804.1	-0.26	0.13	GO:0016597,GO:0008152,GO:0006468,GO:0004672	AT4G38470.1		ACT-like protein tyrosine kinase family protein
Eucgr.I02291	Eucgr.I02291.1	-0.49	0.13	GO:0006468,GO:0004672	AT4G35780.1		ACT-like protein tyrosine kinase family protein
Eucgr.I02295	Eucgr.I02295.1	-1.6	-0.017		AT4G35780.1		ACT-like protein tyrosine kinase family protein
Eucgr.I02294	Eucgr.I02294.1	-1.7	-0.25		AT2G17700.1		ACT-like protein tyrosine kinase family protein
Eucgr.F01702	Eucgr.F01702.1	-2.2	0.7	GO:0006468,GO:0004672	AT4G38470.1		ACT-like protein tyrosine kinase family protein
Eucgr.F01702	Eucgr.F01702.2	-2.2	0.7	GO:0006468,GO:0004672	AT4G38470.1		ACT-like protein tyrosine kinase family protein
Eucgr.F01702	Eucgr.F01702.3	-2.2	0.7	GO:0006468,GO:0004672	AT4G38470.1		ACT-like protein tyrosine kinase family protein
Eucgr.F01702	Eucgr.F01702.4	-2.2	0.7	GO:0006468,GO:0004672	AT4G38470.1		ACT-like protein tyrosine kinase family protein
Eucgr.F01702	Eucgr.F01702.5	-2.2	0.7	GO:0006468,GO:0004672	AT4G38470.1		ACT-like protein tyrosine kinase family protein
Eucgr.C01720	Eucgr.C01720.1	2.9	-0.53	GO:0016597,GO:0008152	AT5G25320.1		ACT-like superfamily protein
Eucgr.A01656	Eucgr.A01656.2	-0.096	0.064		AT2G36840.1		ACT-like superfamily protein
Eucgr.A01656	Eucgr.A01656.1	-0.096	0.064		AT2G36840.1		ACT-like superfamily protein
Eucgr.G02875	Eucgr.G02875.1	-0.28	0.18		AT2G36840.1		ACT-like superfamily protein
Eucgr.J01053	Eucgr.J01053.1	-0.83	-0.26		AT2G36840.1		ACT-like superfamily protein
Eucgr.I02268	Eucgr.I02268.1	2.8	-2.4	GO:0008152,GO:0003824	AT1G20560.1	AAE1	acyl activating enzyme 1
Eucgr.I02260	Eucgr.I02260.1	0	5.3	GO:0008152,GO:0003824	AT1G20560.1	AAE1	acyl activating enzyme 1
Eucgr.F01768	Eucgr.F01768.1	-0.019	-0.065	GO:0008152,GO:0003824	AT1G20560.1	AAE1	acyl activating enzyme 1
Eucgr.I02243	Eucgr.I02243.1	-1.9	-2.7	GO:0008152,GO:0003824	AT1G20560.1	AAE1	acyl activating enzyme 1
Eucgr.I02262	Eucgr.I02262.1	-2.1	3.1	GO:0008152,GO:0003824	AT1G20560.1	AAE1	acyl activating enzyme 1
Eucgr.I02241	Eucgr.I02241.1	-2.6	0.78	GO:0008152,GO:0003824	AT1G20560.1	AAE1	acyl activating enzyme 1
Eucgr.I02239	Eucgr.I02239.1	-2.9	-0.6	GO:0008152,GO:0003824	AT1G20560.1	AAE1	acyl activating enzyme 1
Eucgr.F02923	Eucgr.F02923.1	0.79	0.059	GO:0008152,GO:0003824	AT5G16370.1	AAE5	acyl activating enzyme 5
Eucgr.F02925	Eucgr.F02925.1	0.3	-0.36	GO:0008152,GO:0003824	AT5G16370.1	AAE5	acyl activating enzyme 5
Eucgr.J02611	Eucgr.J02611.1	-1.1	2.1		AT3G05020.1	ACP,ACP1	acyl carrier protein 1
Eucgr.B01262	Eucgr.B01262.2	-0.084	-0.3		AT1G54630.1	ACP3	acyl carrier protein 3
Eucgr.B01262	Eucgr.B01262.1	-0.084	-0.3		AT1G54630.1	ACP3	acyl carrier protein 3
Eucgr.H03763	Eucgr.H03763.1	0.46	0.075		AT4G25050.1	ACP4	acyl carrier protein 4
Eucgr.H03763	Eucgr.H03763.2	0.46	0.075		AT4G25050.1	ACP4	acyl carrier protein 4
Eucgr.H03757	Eucgr.H03757.1	0.22	-0.027		AT4G25050.1	ACP4	acyl carrier protein 4
Eucgr.H03474	Eucgr.H03474.1	0.093	0.018		AT4G25050.1	ACP4	acyl carrier protein 4
Eucgr.H03718	Eucgr.H03718.1	-0.19	-0.12		AT4G25050.1	ACP4	acyl carrier protein 4
Eucgr.G01960	Eucgr.G01960.3	-0.72	-0.18		AT4G25050.1	ACP4	acyl carrier protein 4
Eucgr.G01960	Eucgr.G01960.2	-0.72	-0.18		AT4G25050.1	ACP4	acyl carrier protein 4
Eucgr.G01960	Eucgr.G01960.1	-0.72	-0.18		AT4G25050.1	ACP4	acyl carrier protein 4
Eucgr.H03739	Eucgr.H03739.1	-3.1	-3.9		AT4G25050.1	ACP4	acyl carrier protein 4
Eucgr.I00938	Eucgr.I00938.1	0.81	0.89	GO:0006629	AT4G37070.2	AtPLAIVA,PLA IVA,PLP1	Acyl transferase/acyl hydrolase/lysophospholipase superfamily protein
Eucgr.G00613	Eucgr.G00613.2	0.77	0.2		AT1G33270.1		Acyl transferase/acyl hydrolase/lysophospholipase superfamily protein
Eucgr.G00613	Eucgr.G00613.1	0.77	0.2	GO:0006629	AT1G33270.1		Acyl transferase/acyl hydrolase/lysophospholipase superfamily protein
Eucgr.H00771	Eucgr.H00771.1	0	5.5	GO:0016790,GO:0006633	AT4G13050.1		Acyl-ACP thioesterase
Eucgr.H00773	Eucgr.H00773.1	-5.1	-0.5	GO:0016790,GO:0006633	AT4G13050.1		Acyl-ACP thioesterase
Eucgr.D00163	Eucgr.D00163.1	-0.28	0.11	GO:0008152,GO:0003824	AT1G30520.1	AAE14	acyl-activating enzyme 14
Eucgr.D00174	Eucgr.D00174.1	-0.99	1	GO:0008152,GO:0003824	AT1G30520.1	AAE14	acyl-activating enzyme 14
Eucgr.D00173	Eucgr.D00173.2	-1.1	-0.15	GO:0008152,GO:0003824	AT1G30520.1	AAE14	acyl-activating enzyme 14
Eucgr.D00173	Eucgr.D00173.1	-1.1	-0.15	GO:0008152,GO:0003824	AT1G30520.1	AAE14	acyl-activating enzyme 14
Eucgr.D00173	Eucgr.D00173.3	-1.1	-0.15	GO:0008152,GO:0003824	AT1G30520.1	AAE14	acyl-activating enzyme 14
Eucgr.K02641	Eucgr.K02641.1	0.22	0.078	GO:0008152,GO:0003824	AT5G23050.1	AAE17	acyl-activating enzyme 17
Eucgr.K02641	Eucgr.K02641.2	0.22	0.078	GO:0008152,GO:0003824	AT5G23050.1	AAE17	acyl-activating enzyme 17
Eucgr.L01217	Eucgr.L01217.1	1.7	-0.37		AT1G55320.2	AAE18	acyl-activating enzyme 18
Eucgr.J01807	Eucgr.J01807.1	1.6	-0.36	GO:0008152,GO:0003824	AT1G55320.1	AAE18	acyl-activating enzyme 18
Eucgr.L00845	Eucgr.L00845.1	0.7	-0.3	GO:0008152,GO:0003824	AT1G55320.1	AAE18	acyl-activating enzyme 18
Eucgr.J01810	Eucgr.J01810.1	0.62	-2.1		AT1G55320.1	AAE18	acyl-activating enzyme 18
Eucgr.J01816	Eucgr.J01816.1	0.42	-0.31	GO:0008152,GO:0003824	AT1G55320.2	AAE18	acyl-activating enzyme 18
Eucgr.L00848	Eucgr.L00848.1	0.24	0.23	GO:0008152,GO:0003824	AT1G55320.1	AAE18	acyl-activating enzyme 18
Eucgr.L01220	Eucgr.L01220.1	0.0025	-0.14	GO:0008152,GO:0003824	AT1G55320.1	AAE18	acyl-activating enzyme 18
Eucgr.J01811	Eucgr.J01811.1	-0.013	0.13	GO:0008152,GO:0003824	AT1G55320.1	AAE18	acyl-activating enzyme 18
Eucgr.L00842	Eucgr.L00842.1	-0.38	-1		AT1G55320.2	AAE18	acyl-activating enzyme 18
Eucgr.J01813	Eucgr.J01813.1	-0.39	-0.0031	GO:0008152,GO:0003824	AT1G55320.1	AAE18	acyl-activating enzyme 18
Eucgr.A00198	Eucgr.A00198.1	1	0.09	GO:0008152,GO:0003824	AT3G16910.1	AAE7,ACN1	acyl-activating enzyme 7
Eucgr.A00202	Eucgr.A00202.1	-0.42	-0.2	GO:0008152,GO:0003824	AT3G16910.1	AAE7,ACN1	acyl-activating enzyme 7
Eucgr.A00203	Eucgr.A00203.1	-1.9	1.1	GO:0008152,GO:0003824	AT3G16910.1	AAE7,ACN1	acyl-activating enzyme 7
Eucgr.H00222	Eucgr.H00222.1	-0.54	0.17		AT4G14570.1		acylaminoacyl-peptidase-related
Eucgr.H00222	Eucgr.H00222.2	-0.54	0.17	GO:0008236,GO:0006508	AT4G14570.1		acylaminoacyl-peptidase-related
Eucgr.H00221	Eucgr.H00221.1	-0.57	-0.14		AT4G14570.1		acylaminoacyl-peptidase-related
Eucgr.K00399	Eucgr.K00399.1	0.32	0.024	GO:0000062	AT4G27780.1	ACBP2	acyl-CoA binding protein 2
Eucgr.J00178	Eucgr.J00178.1	-3.4	0.41		AT4G27780.1	ACBP2	acyl-CoA binding protein 2
Eucgr.L02127	Eucgr.L02127.1	0.73	0.26		AT3G05420.2	ACBP4	acyl-CoA binding protein 4
Eucgr.B01931	Eucgr.B01931.1	-0.21	-0.096	GO:0000062	AT3G05420.2	ACBP4	acyl-CoA binding protein 4
Eucgr.B01578	Eucgr.B01578.1	0.37	0.55	GO:0055114,GO:0050660,GO:0016627,GO:0008152,GO:0003995	AT3G06810.1	IBR3	acyl-CoA dehydrogenase-related
Eucgr.L02403	Eucgr.L02403.1	3.1	6.2		AT3G53680.1		Acyl-CoA N-acyltransferase with RING/FYVE/PHD-type zinc finger domain
Eucgr.B03919	Eucgr.B03919.1	0.48	0.29		AT2G27980.1		Acyl-CoA N-acyltransferase with RING/FYVE/PHD-type zinc finger domain
Eucgr.A01604	Eucgr.A01604.3	0.28	0.3	GO:0005515	AT2G36720.1		Acyl-CoA N-acyltransferase with RING/FYVE/PHD-type zinc finger domain
Eucgr.A01604	Eucgr.A01604.2	0.28	0.3	GO:0005515	AT2G36720.1		Acyl-CoA N-acyltransferase with RING/FYVE/PHD-type zinc finger domain
Eucgr.A01604	Eucgr.A01604.4	0.28	0.3	GO:0005515	AT2G36720.1		Acyl-CoA N-acyltransferase with RING/FYVE/PHD-type zinc finger domain
Eucgr.A01604	Eucgr.A01604.1	0.28	0.3	GO:0005515	AT2G36720.1		Acyl-CoA N-acyltransferase with RING/FYVE/PHD-type zinc finger domain
Eucgr.A01244	Eucgr.A01244.1	0.18	-0.03	GO:0005515	AT2G37520.1		Acyl-CoA N-acyltransferase with RING/FYVE/PHD-type zinc finger domain
Eucgr.L01272	Eucgr.L01272.1	0.0054	0.031	GO:0005515	AT4G14920.1		Acyl-CoA N-acyltransferase with RING/FYVE/PHD-type zinc finger protein
Eucgr.H01466	Eucgr.H01466.1	-0.16	-0.28		AT4G14920.1		Acyl-CoA N-acyltransferase with RING/FYVE/PHD-type zinc finger protein
Eucgr.B01086	Eucgr.B01086.1	-0.31	-0.24		AT4G14920.1		Acyl-CoA N-acyltransferase with RING/FYVE/PHD-type zinc finger protein
Eucgr.F01223	Eucgr.F01223.1	-0.67	-0.15	GO:0005515,GO:0044030,GO:0043966,GO:0004402	AT3G14980.1		Acyl-CoA N-acyltransferase with RING/FYVE/PHD-type zinc finger protein
Eucgr.H03445	Eucgr.H03445.1	7.6	0	GO:0008080	AT2G32030.1		Acyl-CoA N-acyltransferases (NAT) superfamily protein
Eucgr.H03927	Eucgr.H03927.1	6.6	6.2		AT1G21770.1		Acyl-CoA N-acyltransferases (NAT) superfamily protein
Eucgr.F03960	Eucgr.F03960.1	2.5	1.3	GO:0008080	AT2G23060.1		Acyl-CoA N-acyltransferases (NAT) superfamily protein
Eucgr.H03446	Eucgr.H03446.1	1.2	-0.37	GO:0008080	AT2G32020.1		Acyl-CoA N-acyltransferases (NAT) superfamily protein
Eucgr.F02983	Eucgr.F02983.3	0.84	0.91		AT1G72030.1		Acyl-CoA N-acyltransferases (NAT) superfamily protein
Eucgr.F02983	Eucgr.F02983.4	0.84	0.91		AT1G72030.1		Acyl-CoA N-acyltransferases (NAT) superfamily protein
Eucgr.F02983	Eucgr.F02983.2	0.84	0.91		AT1G72030.1		Acyl-CoA N-acyltransferases (NAT) superfamily protein
Eucgr.F02983	Eucgr.F02983.1	0.84	0.91	GO:0008080	AT1G72030.1		Acyl-CoA N-acyltransferases (NAT) superfamily protein
Eucgr.C00816	Eucgr.C00816.1	0.72	-0.22	GO:0008080	AT2G06025.1		Acyl-CoA N-acyltransferases (NAT) superfamily protein
Eucgr.C00816	Eucgr.C00816.2	0.72	-0.22	GO:0008080	AT2G06025.1		Acyl-CoA N-acyltransferases (NAT) superfamily protein
Eucgr.C00816	Eucgr.C00816.3	0.72	-0.22	GO:0008080	AT2G06025.1		Acyl-CoA N-acyltransferases (NAT) superfamily protein
Eucgr.C01245	Eucgr.C01245.1	0.47	0.32	GO:0008080	AT4G28030.1		Acyl-CoA N-acyltransferases (NAT) superfamily protein
Eucgr.C01245	Eucgr.C01245.3	0.47	0.32		AT4G28030.1		Acyl-CoA N-acyltransferases (NAT) superfamily protein
Eucgr.C01245	Eucgr.C01245.2	0.47	0.32	GO:0008080	AT4G28030.1		Acyl-CoA N-acyltransferases (NAT) superfamily protein
Eucgr.G03172	Eucgr.G03172.1	0.41	0.21	GO:0008080	AT4G19985.1		Acyl-CoA N-acyltransferases (NAT) superfamily protein
Eucgr.B02548	Eucgr.B02548.1	0.35	0.12	GO:0008080	AT1G24040.1		Acyl-CoA N-acyltransferases (NAT) superfamily protein
Eucgr.C01806	Eucgr.C01806.1	0.34	0.036	GO:0008080	AT5G11340.1		Acyl-CoA N-acyltransferases (NAT) superfamily protein
Eucgr.H04873	Eucgr.H04873.1	0.32	0.48	GO:0008080	AT5G16800.2		Acyl-CoA N-acyltransferases (NAT) superfamily protein
Eucgr.B02233	Eucgr.B02233.1	0.27	0.27	GO:0008080	AT2G30090.1		Acyl-CoA N-acyltransferases (NAT) superfamily protein
Eucgr.H00567	Eucgr.H00567.2	0.18	0.52	GO:0008080	AT1G18335.1		Acyl-CoA N-acyltransferases (NAT) superfamily protein
Eucgr.H00567	Eucgr.H00567.1	0.18	0.52	GO:0008080	AT1G18335.1		Acyl-CoA N-acyltransferases (NAT) superfamily protein
Eucgr.J00649	Eucgr.J00649.2	0.15	0.32		AT2G06025.1		Acyl-CoA N-acyltransferases (NAT) superfamily protein
Eucgr.J00649	Eucgr.J00649.1	0.15	0.32	GO:0008080	AT2G06025.1		Acyl-CoA N-acyltransferases (NAT) superfamily protein
Eucgr.K00079	Eucgr.K00079.3	0.13	0.2	GO:0008080	AT5G16800.2		Acyl-CoA N-acyltransferases (NAT) superfamily protein
Eucgr.K00079	Eucgr.K00079.1	0.13	0.2	GO:0008080	AT5G16800.2		Acyl-CoA N-acyltransferases (NAT) superfamily protein
Eucgr.K00079	Eucgr.K00079.2	0.13	0.2	GO:0008080	AT5G16800.2		Acyl-CoA N-acyltransferases (NAT) superfamily protein
Eucgr.J01208	Eucgr.J01208.1	0.1	-0.31	GO:0008080	AT5G13780.1		Acyl-CoA N-acyltransferases (NAT) superfamily protein
Eucgr.H03449	Eucgr.H03449.1	0	6.1	GO:0008080	AT3G22560.1		Acyl-CoA N-acyltransferases (NAT) superfamily protein
Eucgr.G01929	Eucgr.G01929.3	-0.0079	-0.092	GO:0008080	AT2G38130.2	ATMAK3	Acyl-CoA N-acyltransferases (NAT) superfamily protein
Eucgr.G01929	Eucgr.G01929.1	-0.0079	-0.092	GO:0008080	AT2G38130.2	ATMAK3	Acyl-CoA N-acyltransferases (NAT) superfamily protein
Eucgr.G01929	Eucgr.G01929.2	-0.0079	-0.092	GO:0008080	AT2G38130.2	ATMAK3	Acyl-CoA N-acyltransferases (NAT) superfamily protein
Eucgr.K00659	Eucgr.K00659.1	-0.082	0.18	GO:0008080	AT2G04845.1		Acyl-CoA N-acyltransferases (NAT) superfamily protein
Eucgr.K03364	Eucgr.K03364.2	-0.12	-0.087	GO:0008080	AT1G03150.1		Acyl-CoA N-acyltransferases (NAT) superfamily protein
Eucgr.K03364	Eucgr.K03364.5	-0.12	-0.087	GO:0008080	AT1G03150.1		Acyl-CoA N-acyltransferases (NAT) superfamily protein
Eucgr.K03364	Eucgr.K03364.4	-0.12	-0.087	GO:0008080	AT1G03150.1		Acyl-CoA N-acyltransferases (NAT) superfamily protein
Eucgr.K03364	Eucgr.K03364.3	-0.12	-0.087	GO:0008080	AT1G03150.1		Acyl-CoA N-acyltransferases (NAT) superfamily protein
Eucgr.K03364	Eucgr.K03364.1	-0.12	-0.087	GO:0008080	AT1G03150.1		Acyl-CoA N-acyltransferases (NAT) superfamily protein
Eucgr.I00714	Eucgr.I00714.1	-0.15	0.26	GO:0008080	AT2G23060.1		Acyl-CoA N-acyltransferases (NAT) superfamily protein
Eucgr.G02836	Eucgr.G02836.1	-0.26	0.13	GO:0008080	AT2G39000.1		Acyl-CoA N-acyltransferases (NAT) superfamily protein
Eucgr.F03793	Eucgr.F03793.1	-0.32	-0.37		AT1G21770.1		Acyl-CoA N-acyltransferases (NAT) superfamily protein
Eucgr.H04392	Eucgr.H04392.1	-1.2	-0.63	GO:0008080	AT3G22560.1		Acyl-CoA N-acyltransferases (NAT) superfamily protein
Eucgr.H03444	Eucgr.H03444.1	-1.3	-0.41	GO:0008080	AT2G32030.1		Acyl-CoA N-acyltransferases (NAT) superfamily protein
Eucgr.B03096	Eucgr.B03096.1	-4.9	0.54	GO:0008080	AT1G26220.1		Acyl-CoA N-acyltransferases (NAT) superfamily protein
Eucgr.E00406	Eucgr.E00406.1	-0.063	0.1	GO:0055114,GO:0003995,GO:0006635,GO:0005777,GO:0003997	AT4G16760.1	ACX1,ATACX1	acyl-CoA oxidase 1
Eucgr.H04812	Eucgr.H04812.1	0.81	0.044	GO:0055114,GO:0016627,GO:0003995,GO:0006635,GO:0005777,GO:0003997	AT5G65110.1	ACX2,ATACX2	acyl-CoA oxidase 2
Eucgr.K01080	Eucgr.K01080.2	-0.15	-0.2	GO:0055114,GO:0016627,GO:0003995,GO:0006635,GO:0005777,GO:0003997	AT1G06290.1	ACX3,ATACX3	acyl-CoA oxidase 3
Eucgr.K01080	Eucgr.K01080.1	-0.15	-0.2	GO:0055114,GO:0016627,GO:0003995,GO:0006635,GO:0005777,GO:0003997	AT1G06290.1	ACX3,ATACX3	acyl-CoA oxidase 3
Eucgr.A00529	Eucgr.A00529.1	0.23	-0.11	GO:0055114,GO:0003995,GO:0016627,GO:0050660,GO:0008152	AT3G51840.1	ACX4,ATG6,ATSCX	acyl-CoA oxidase 4
Eucgr.A00529	Eucgr.A00529.2	0.23	-0.11	GO:0055114,GO:0016627,GO:0003995,GO:0050660,GO:0008152	AT3G51840.1	ACX4,ATG6,ATSCX	acyl-CoA oxidase 4
Eucgr.I00619	Eucgr.I00619.1	2.1	-4.1		AT3G51970.1	ASAT1,ATASAT1,ATSAT1	acyl-CoA sterol acyl transferase 1
Eucgr.E03930	Eucgr.E03930.1	0.93	-0.49		AT3G51970.1	ASAT1,ATASAT1,ATSAT1	acyl-CoA sterol acyl transferase 1
Eucgr.E03928	Eucgr.E03928.1	0.54	-0.97		AT3G51970.1	ASAT1,ATASAT1,ATSAT1	acyl-CoA sterol acyl transferase 1
Eucgr.D01457	Eucgr.D01457.1	0	0		AT3G51970.1	ASAT1,ATASAT1,ATSAT1	acyl-CoA sterol acyl transferase 1
Eucgr.D01403	Eucgr.D01403.1	-0.28	-3.1		AT3G51970.1	ASAT1,ATASAT1,ATSAT1	acyl-CoA sterol acyl transferase 1
Eucgr.D01403	Eucgr.D01403.2	-0.28	-3.1		AT3G51970.1	ASAT1,ATASAT1,ATSAT1	acyl-CoA sterol acyl transferase 1
Eucgr.D00093	Eucgr.D00093.1	-0.84	0.54		AT3G51970.1	ASAT1,ATASAT1,ATSAT1	acyl-CoA sterol acyl transferase 1
Eucgr.L00540	Eucgr.L00540.1	-0.86	0.65		AT3G51970.1	ASAT1,ATASAT1,ATSAT1	acyl-CoA sterol acyl transferase 1
Eucgr.D01396	Eucgr.D01396.1	-0.96	-5.3		AT3G51970.1	ASAT1,ATASAT1,ATSAT1	acyl-CoA sterol acyl transferase 1
Eucgr.D01409	Eucgr.D01409.1	-1.1	-1.7		AT3G51970.1	ASAT1,ATASAT1,ATSAT1	acyl-CoA sterol acyl transferase 1
Eucgr.E03931	Eucgr.E03931.1	-1.8	-0.23		AT3G51970.1	ASAT1,ATASAT1,ATSAT1	acyl-CoA sterol acyl transferase 1
Eucgr.D01408	Eucgr.D01408.1	-2.3	-1.6		AT3G51970.1	ASAT1,ATASAT1,ATSAT1	acyl-CoA sterol acyl transferase 1
Eucgr.D01398	Eucgr.D01398.1	-2.6	-3.4		AT3G51970.1	ASAT1,ATASAT1,ATSAT1	acyl-CoA sterol acyl transferase 1
Eucgr.L00539	Eucgr.L00539.1	-4.8	-0.59		AT3G51970.1	ASAT1,ATASAT1,ATSAT1	acyl-CoA sterol acyl transferase 1
Eucgr.B03502	Eucgr.B03502.1	2.5	-0.2	GO:0008152,GO:0003824	AT1G62940.1	ACOS5	acyl-CoA synthetase 5
Eucgr.E00141	Eucgr.E00141.1	0.09	0.27	GO:0047617,GO:0006637	AT1G01710.1		Acyl-CoA thioesterase family protein
Eucgr.E00141	Eucgr.E00141.2	0.09	0.27	GO:0047617,GO:0006637	AT1G01710.1		Acyl-CoA thioesterase family protein
Eucgr.F00120	Eucgr.F00120.1	0.35	0.19	GO:0000062	AT4G24230.6	ACBP3	acyl-CoA-binding domain 3
Eucgr.F00120	Eucgr.F00120.3	0.35	0.19	GO:0000062	AT4G24230.6	ACBP3	acyl-CoA-binding domain 3
Eucgr.F00120	Eucgr.F00120.2	0.35	0.19	GO:0000062	AT4G24230.6	ACBP3	acyl-CoA-binding domain 3
Eucgr.I00720	Eucgr.I00720.1	-0.12	0.5	GO:0000062	AT4G24230.6	ACBP3	acyl-CoA-binding domain 3
Eucgr.C00828	Eucgr.C00828.1	0.57	0.12	GO:0000062	AT1G31812.1	ACBP,ACBP6	acyl-CoA-binding protein 6
Eucgr.E01218	Eucgr.E01218.2	-0.11	-0.072	GO:0000062	AT1G31812.1	ACBP,ACBP6	acyl-CoA-binding protein 6
Eucgr.E01218	Eucgr.E01218.1	-0.11	-0.072	GO:0000062	AT1G31812.1	ACBP,ACBP6	acyl-CoA-binding protein 6
Eucgr.K02933	Eucgr.K02933.1	0.84	-0.36		AT5G03370.1		acylphosphatase family
Eucgr.A01905	Eucgr.A01905.1	0.046	-0.026	GO:0016020,GO:0006897	AT3G58600.1		Adaptin ear-binding coat-associated protein 1 NECAP-1
Eucgr.G00898	Eucgr.G00898.1	1.7	1.8	GO:0016573,GO:0006355,GO:0004402,GO:0030117,GO:0016192,GO:0006886	AT4G23460.1		Adaptin family protein
Eucgr.E01151	Eucgr.E01151.2	0.041	-0.15	GO:0030117,GO:0016192,GO:0006886	AT1G31730.1		Adaptin family protein
Eucgr.E01151	Eucgr.E01151.1	0.041	-0.15	GO:0030117,GO:0016192,GO:0006886	AT1G31730.1		Adaptin family protein
Eucgr.D01829	Eucgr.D01829.1	-0.13	-0.16	GO:0030131,GO:0016192,GO:0006886,GO:0030117	AT4G23460.1		Adaptin family protein
Eucgr.C01579	Eucgr.C01579.2	-0.26	-0.2	GO:0016192	AT5G11490.2		adaptin family protein
Eucgr.C01579	Eucgr.C01579.1	-0.26	-0.2	GO:0030131,GO:0016192,GO:0006886	AT5G11490.1		adaptin family protein
Eucgr.B03952	Eucgr.B03952.2	-0.074	-0.048	GO:0030131,GO:0016192,GO:0006886,GO:0030117	AT1G60070.1		Adaptor protein complex AP-1, gamma subunit
Eucgr.B03952	Eucgr.B03952.1	-0.074	-0.048	GO:0030131,GO:0016192,GO:0006886,GO:0030117	AT1G60070.1		Adaptor protein complex AP-1, gamma subunit
Eucgr.J00415	Eucgr.J00415.1	-0.04	0.0065	GO:0030131,GO:0016192,GO:0006886,GO:0030117	AT5G22780.1		Adaptor protein complex AP-2, alpha subunit
Eucgr.G03047	Eucgr.G03047.1	-1.3	-0.029	GO:0016833,GO:0009058	AT3G55870.1		ADC synthase superfamily protein
Eucgr.K03472	Eucgr.K03472.1	8.7	4.2	GO:0006950	AT2G47710.1		Adenine nucleotide alpha hydrolases-like superfamily protein
Eucgr.E03842	Eucgr.E03842.1	4.8	0		AT5G47740.1		Adenine nucleotide alpha hydrolases-like superfamily protein
Eucgr.I02534	Eucgr.I02534.1	4.7	4.1	GO:0006950	AT5G14680.1		Adenine nucleotide alpha hydrolases-like superfamily protein
Eucgr.F02899	Eucgr.F02899.1	2.3	0.33	GO:0006950	AT3G03270.2		Adenine nucleotide alpha hydrolases-like superfamily protein
Eucgr.L03339	Eucgr.L03339.2	1.8	0.58	GO:0006950	AT5G14680.1		Adenine nucleotide alpha hydrolases-like superfamily protein
Eucgr.L03339	Eucgr.L03339.1	1.8	0.58	GO:0006950	AT5G14680.1		Adenine nucleotide alpha hydrolases-like superfamily protein
Eucgr.B03008	Eucgr.B03008.1	1.5	0.14	GO:0006950	AT1G68300.1		Adenine nucleotide alpha hydrolases-like superfamily protein
Eucgr.A00139	Eucgr.A00139.1	1.4	1.7	GO:0006950	AT5G14680.1		Adenine nucleotide alpha hydrolases-like superfamily protein
Eucgr.J02214	Eucgr.J02214.1	0.98	-0.34	GO:0006950	AT5G14680.1		Adenine nucleotide alpha hydrolases-like superfamily protein
Eucgr.K03471	Eucgr.K03471.1	0.94	0.11	GO:0006950	AT2G47710.1		Adenine nucleotide alpha hydrolases-like superfamily protein
Eucgr.E03331	Eucgr.E03331.1	0.81	-0.45	GO:0006950	AT5G14680.1		Adenine nucleotide alpha hydrolases-like superfamily protein
Eucgr.G01684	Eucgr.G01684.2	0.75	0.54	GO:0006950	AT2G21620.1	RD2	Adenine nucleotide alpha hydrolases-like superfamily protein
Eucgr.G01684	Eucgr.G01684.1	0.75	0.54	GO:0006950	AT2G21620.1	RD2	Adenine nucleotide alpha hydrolases-like superfamily protein
Eucgr.G01684	Eucgr.G01684.3	0.75	0.54	GO:0006950	AT2G21620.1	RD2	Adenine nucleotide alpha hydrolases-like superfamily protein
Eucgr.B02732	Eucgr.B02732.1	0.7	-0.32	GO:0006950	AT3G53990.1		Adenine nucleotide alpha hydrolases-like superfamily protein
Eucgr.B03009	Eucgr.B03009.1	0.53	-1.7	GO:0006950	AT1G68300.1		Adenine nucleotide alpha hydrolases-like superfamily protein
Eucgr.E03674	Eucgr.E03674.1	0.52	0.34	GO:0006950	AT1G11360.3		Adenine nucleotide alpha hydrolases-like superfamily protein
Eucgr.A02347	Eucgr.A02347.2	0.45	0.0075		AT4G35910.1		Adenine nucleotide alpha hydrolases-like superfamily protein
Eucgr.A02347	Eucgr.A02347.1	0.45	0.0075		AT4G35910.1		Adenine nucleotide alpha hydrolases-like superfamily protein
Eucgr.A02347	Eucgr.A02347.3	0.45	0.0075		AT4G35910.1		Adenine nucleotide alpha hydrolases-like superfamily protein
Eucgr.C01033	Eucgr.C01033.1	0.44	0.23	GO:0016879,GO:0008033,GO:0005737,GO:0005524,GO:0000166	AT3G24560.2	RSY3	Adenine nucleotide alpha hydrolases-like superfamily protein
Eucgr.H01151	Eucgr.H01151.1	0.39	0.21	GO:0006950	AT2G47710.1		Adenine nucleotide alpha hydrolases-like superfamily protein
Eucgr.B03010	Eucgr.B03010.1	0.21	-0.048	GO:0006950	AT1G68300.1		Adenine nucleotide alpha hydrolases-like superfamily protein
Eucgr.B03010	Eucgr.B03010.2	0.21	-0.048	GO:0006950	AT1G68300.1		Adenine nucleotide alpha hydrolases-like superfamily protein
Eucgr.F00412	Eucgr.F00412.1	0.18	-0.14	GO:0006950	AT1G09740.1		Adenine nucleotide alpha hydrolases-like superfamily protein
Eucgr.K01888	Eucgr.K01888.1	0	0	GO:0006950	AT3G11930.1		Adenine nucleotide alpha hydrolases-like superfamily protein
Eucgr.A00373	Eucgr.A00373.1	-0.053	-0.35	GO:0006950	AT3G17020.1		Adenine nucleotide alpha hydrolases-like superfamily protein
Eucgr.E03841	Eucgr.E03841.1	-0.15	-0.61		AT5G47740.1		Adenine nucleotide alpha hydrolases-like superfamily protein
Eucgr.K02804	Eucgr.K02804.1	-0.38	0.18	GO:0006950	AT5G47740.1		Adenine nucleotide alpha hydrolases-like superfamily protein
Eucgr.B02294	Eucgr.B02294.2	-0.45	-0.15	GO:0006950	AT3G53990.1		Adenine nucleotide alpha hydrolases-like superfamily protein
Eucgr.B02294	Eucgr.B02294.1	-0.45	-0.15	GO:0006950	AT3G53990.1		Adenine nucleotide alpha hydrolases-like superfamily protein
Eucgr.B00688	Eucgr.B00688.1	-0.58	0.2	GO:0006950	AT1G48960.1		Adenine nucleotide alpha hydrolases-like superfamily protein
Eucgr.G02310	Eucgr.G02310.4	-0.63	0.16	GO:0006950	AT3G11930.1		Adenine nucleotide alpha hydrolases-like superfamily protein
Eucgr.G02310	Eucgr.G02310.1	-0.63	0.16	GO:0006950	AT3G11930.1		Adenine nucleotide alpha hydrolases-like superfamily protein
Eucgr.G02310	Eucgr.G02310.2	-0.63	0.16	GO:0006950	AT3G11930.1		Adenine nucleotide alpha hydrolases-like superfamily protein
Eucgr.G02310	Eucgr.G02310.3	-0.63	0.16	GO:0006950	AT3G11930.1		Adenine nucleotide alpha hydrolases-like superfamily protein
Eucgr.L02063	Eucgr.L02063.1	-0.68	-0.71	GO:0006950	AT5G14680.1		Adenine nucleotide alpha hydrolases-like superfamily protein
Eucgr.K00690	Eucgr.K00690.1	-0.93	-0.24	GO:0006950	AT5G14680.1		Adenine nucleotide alpha hydrolases-like superfamily protein
Eucgr.E03844	Eucgr.E03844.1	-1.1	0.21		AT5G47740.2		Adenine nucleotide alpha hydrolases-like superfamily protein
Eucgr.G02426	Eucgr.G02426.1	-1.1	-0.19	GO:0006950	AT1G69080.1		Adenine nucleotide alpha hydrolases-like superfamily protein
Eucgr.H02904	Eucgr.H02904.1	-1.1	-0.0061	GO:0006950	AT4G13450.1		Adenine nucleotide alpha hydrolases-like superfamily protein
Eucgr.F04356	Eucgr.F04356.1	-2.3	0.18	GO:0006950	AT1G44760.1		Adenine nucleotide alpha hydrolases-like superfamily protein
Eucgr.B00635	Eucgr.B00635.1	-3.4	-0.46	GO:0006950	AT5G17390.1		Adenine nucleotide alpha hydrolases-like superfamily protein
Eucgr.K02076	Eucgr.K02076.1	-4	-0.81	GO:0006950	AT5G14680.1		Adenine nucleotide alpha hydrolases-like superfamily protein
Eucgr.E00845	Eucgr.E00845.1	1.5	0.061		AT4G01100.1	ADNT1	adenine nucleotide transporter 1
Eucgr.D02348	Eucgr.D02348.2	-0.23	-0.0011		AT4G01100.1	ADNT1	adenine nucleotide transporter 1
Eucgr.D02348	Eucgr.D02348.1	-0.23	-0.0011		AT4G01100.1	ADNT1	adenine nucleotide transporter 1
Eucgr.D02348	Eucgr.D02348.3	-0.23	-0.0011		AT4G01100.1	ADNT1	adenine nucleotide transporter 1
Eucgr.F02260	Eucgr.F02260.3	-0.4	-0.17	GO:0009116	AT1G27450.1	APT1,ATAPT1	adenine phosphoribosyl transferase 1
Eucgr.F02260	Eucgr.F02260.1	-0.4	-0.17	GO:0009116	AT1G27450.1	APT1,ATAPT1	adenine phosphoribosyl transferase 1
Eucgr.F02260	Eucgr.F02260.2	-0.4	-0.17		AT1G27450.1	APT1,ATAPT1	adenine phosphoribosyl transferase 1
Eucgr.E00451	Eucgr.E00451.3	-1.6	-0.17	GO:0009116	AT4G22570.1	APT3	adenine phosphoribosyl transferase 3
Eucgr.E00451	Eucgr.E00451.1	-1.6	-0.17	GO:0009116	AT4G22570.1	APT3	adenine phosphoribosyl transferase 3
Eucgr.E00451	Eucgr.E00451.2	-1.6	-0.17		AT4G22570.1	APT3	adenine phosphoribosyl transferase 3
Eucgr.D02033	Eucgr.D02033.1	-0.83	-0.053	GO:0009116	AT4G12440.2	APT4	adenine phosphoribosyl transferase 4
Eucgr.D02033	Eucgr.D02033.2	-0.83	-0.053	GO:0009116	AT4G12440.2	APT4	adenine phosphoribosyl transferase 4
Eucgr.C02760	Eucgr.C02760.1	-0.53	-0.61	GO:0009116	AT5G11160.1	APT5	adenine phosphoribosyltransferase 5
Eucgr.F03882	Eucgr.F03882.1	-1.6	-0.0021	GO:0009116	AT5G11160.1	APT5	adenine phosphoribosyltransferase 5
Eucgr.E00169	Eucgr.E00169.2	1.3	1.2	GO:0006396,GO:0004000,GO:0003723	AT1G01760.1		adenosine deaminases;RNA binding;RNA binding;adenosine deaminases
Eucgr.E00169	Eucgr.E00169.1	1.3	1.2	GO:0006396,GO:0004000,GO:0003723	AT1G01760.1		adenosine deaminases;RNA binding;RNA binding;adenosine deaminases
Eucgr.E00173	Eucgr.E00173.1	1	0.58	GO:0006396,GO:0004000,GO:0003723	AT1G01760.1		adenosine deaminases;RNA binding;RNA binding;adenosine deaminases
Eucgr.G02788	Eucgr.G02788.1	0.61	-0.023	GO:0019205,GO:0006139,GO:0005524	AT2G37250.1	ADK,ATPADK1	adenosine kinase
Eucgr.K03197	Eucgr.K03197.2	0.57	-0.12	GO:0019205,GO:0006139,GO:0005524	AT2G37250.1	ADK,ATPADK1	adenosine kinase
Eucgr.K03197	Eucgr.K03197.1	0.57	-0.12	GO:0019205,GO:0006139,GO:0005524	AT2G37250.1	ADK,ATPADK1	adenosine kinase
Eucgr.K03197	Eucgr.K03197.3	0.57	-0.12	GO:0019205,GO:0006139,GO:0005524	AT2G37250.1	ADK,ATPADK1	adenosine kinase
Eucgr.K01249	Eucgr.K01249.1	-0.78	-0.34		AT5G03300.1	ADK2	adenosine kinase 2
Eucgr.K01249	Eucgr.K01249.3	-0.78	-0.34		AT5G03300.1	ADK2	adenosine kinase 2
Eucgr.K01249	Eucgr.K01249.5	-0.78	-0.34		AT5G03300.1	ADK2	adenosine kinase 2
Eucgr.K01249	Eucgr.K01249.2	-0.78	-0.34		AT5G03300.1	ADK2	adenosine kinase 2
Eucgr.K01249	Eucgr.K01249.4	-0.78	-0.34		AT5G03300.1	ADK2	adenosine kinase 2
Eucgr.F02985	Eucgr.F02985.2	1.4	0.27	GO:0019205,GO:0006139,GO:0005524	AT5G47840.1	AMK2	adenosine monophosphate kinase
Eucgr.F02985	Eucgr.F02985.1	1.4	0.27	GO:0019205,GO:0006139,GO:0005524	AT5G47840.1	AMK2	adenosine monophosphate kinase
Eucgr.F02985	Eucgr.F02985.3	1.4	0.27	GO:0019205,GO:0006139,GO:0005524	AT5G47840.1	AMK2	adenosine monophosphate kinase
Eucgr.D01304	Eucgr.D01304.1	0.5	0.2	GO:0019239	AT4G04880.1		adenosine/AMP deaminase family protein
Eucgr.D01304	Eucgr.D01304.2	0.5	0.2	GO:0019239	AT4G04880.1		adenosine/AMP deaminase family protein
Eucgr.A02099	Eucgr.A02099.1	-0.026	0.16	GO:0005524,GO:0004020,GO:0000103	AT3G03900.1	APK3	adenosine-5\'-phosphosulfate (APS) kinase 3
Eucgr.A02099	Eucgr.A02099.2	-0.026	0.16	GO:0005524,GO:0004020,GO:0000103	AT3G03900.1	APK3	adenosine-5\'-phosphosulfate (APS) kinase 3
Eucgr.A02099	Eucgr.A02099.3	-0.026	0.16	GO:0005524,GO:0004020,GO:0000103	AT3G03900.1	APK3	adenosine-5\'-phosphosulfate (APS) kinase 3
Eucgr.B03086	Eucgr.B03086.1	0.61	0.23	GO:0008295,GO:0006597,GO:0004014	AT3G25570.2		Adenosylmethionine decarboxylase family protein
Eucgr.C00232	Eucgr.C00232.1	0.41	0.072	GO:0008295,GO:0006597,GO:0004014	AT3G25570.2		Adenosylmethionine decarboxylase family protein
Eucgr.C00232	Eucgr.C00232.2	0.41	0.072	GO:0008295,GO:0006597,GO:0004014	AT3G25570.2		Adenosylmethionine decarboxylase family protein
Eucgr.H03638	Eucgr.H03638.1	-0.13	0.58	GO:0008295,GO:0006597,GO:0004014	AT5G18930.1	BUD2,SAMDC4	Adenosylmethionine decarboxylase family protein
Eucgr.B01190	Eucgr.B01190.1	-2.2	-1.2	GO:0008295,GO:0006597,GO:0004014	AT5G18930.1	BUD2,SAMDC4	Adenosylmethionine decarboxylase family protein
Eucgr.C00186	Eucgr.C00186.3	0.67	0.25	GO:0030170,GO:0008483	AT5G57590.1	BIO1	adenosylmethionine-8-amino-7-oxononanoate transaminases
Eucgr.C00186	Eucgr.C00186.1	0.67	0.25	GO:0030170,GO:0008483	AT5G57590.1	BIO1	adenosylmethionine-8-amino-7-oxononanoate transaminases
Eucgr.C00186	Eucgr.C00186.2	0.67	0.25	GO:0030170,GO:0008483	AT5G57590.1	BIO1	adenosylmethionine-8-amino-7-oxononanoate transaminases
Eucgr.L03509	Eucgr.L03509.1	0.36	-0.044		AT2G11890.1		adenylate cyclases
Eucgr.C00486	Eucgr.C00486.1	0.23	-0.087		AT2G11890.1		adenylate cyclases
Eucgr.J03086	Eucgr.J03086.1	-0.34	0.22		AT2G11890.1		adenylate cyclases
Eucgr.J03086	Eucgr.J03086.2	-0.34	0.22		AT2G11890.1		adenylate cyclases
Eucgr.J03086	Eucgr.J03086.3	-0.34	0.22		AT2G11890.1		adenylate cyclases
Eucgr.K02740	Eucgr.K02740.1	2	0.74	GO:0004017,GO:0019205,GO:0006139,GO:0005524	AT5G63400.1	ADK1	adenylate kinase 1
Eucgr.B00131	Eucgr.B00131.2	-0.27	-0.4	GO:0004017,GO:0019205,GO:0006139,GO:0005524	AT5G63400.1	ADK1	adenylate kinase 1
Eucgr.B00131	Eucgr.B00131.1	-0.27	-0.4	GO:0004017,GO:0019205,GO:0006139,GO:0005524	AT5G63400.1	ADK1	adenylate kinase 1
Eucgr.C00416	Eucgr.C00416.1	-0.91	0.067	GO:0019205,GO:0006139,GO:0005524	AT5G35170.1		adenylate kinase family protein
Eucgr.C00416	Eucgr.C00416.6	-0.91	0.067	GO:0019205,GO:0006139,GO:0005524	AT5G35170.1		adenylate kinase family protein
Eucgr.C00416	Eucgr.C00416.5	-0.91	0.067	GO:0019205,GO:0006139,GO:0005524	AT5G35170.1		adenylate kinase family protein
Eucgr.C00416	Eucgr.C00416.4	-0.91	0.067	GO:0019205,GO:0006139,GO:0005524	AT5G35170.1		adenylate kinase family protein
Eucgr.C00416	Eucgr.C00416.3	-0.91	0.067	GO:0019205,GO:0006139,GO:0005524	AT5G35170.1		adenylate kinase family protein
Eucgr.C00416	Eucgr.C00416.2	-0.91	0.067	GO:0019205,GO:0006139,GO:0005524	AT5G35170.1		adenylate kinase family protein
Eucgr.D01341	Eucgr.D01341.1	-0.13	-0.18	GO:0006164,GO:0005525,GO:0004019	AT3G57610.1	ADSS	adenylosuccinate synthase
Eucgr.D01341	Eucgr.D01341.2	-0.13	-0.18	GO:0006164,GO:0005525,GO:0004019	AT3G57610.1	ADSS	adenylosuccinate synthase
Eucgr.A02394	Eucgr.A02394.1	-0.54	-0.47	GO:0006164,GO:0005525,GO:0004019	AT3G57610.1	ADSS	adenylosuccinate synthase
Eucgr.K01372	Eucgr.K01372.1	0.34	0.29	GO:0016779,GO:0009058	AT5G48300.1	ADG1,APS1	ADP glucose pyrophosphorylase 1
Eucgr.L02767	Eucgr.L02767.1	0	0	GO:0016779,GO:0009058	AT5G19220.1	ADG2,APL1	ADP glucose pyrophosphorylase large subunit 1
Eucgr.L00600	Eucgr.L00600.1	-6.1	-1.5	GO:0016779,GO:0009058	AT5G19220.1	ADG2,APL1	ADP glucose pyrophosphorylase large subunit 1
Eucgr.B01108	Eucgr.B01108.1	-6.7	-2.5	GO:0016779,GO:0009058	AT5G19220.1	ADG2,APL1	ADP glucose pyrophosphorylase large subunit 1
Eucgr.B01108	Eucgr.B01108.3	-6.7	-2.5	GO:0016779,GO:0009058	AT5G19220.1	ADG2,APL1	ADP glucose pyrophosphorylase large subunit 1
Eucgr.B01108	Eucgr.B01108.2	-6.7	-2.5	GO:0016779,GO:0009058	AT5G19220.1	ADG2,APL1	ADP glucose pyrophosphorylase large subunit 1
Eucgr.G03388	Eucgr.G03388.1	-0.44	-0.32		AT5G13490.2	AAC2	ADP/ATP carrier 2
Eucgr.G03387	Eucgr.G03387.1	-0.67	-0.39		AT5G13490.2	AAC2	ADP/ATP carrier 2
Eucgr.A01833	Eucgr.A01833.1	6.5	0.17		AT4G28390.1	AAC3,ATAAC3	ADP/ATP carrier 3
Eucgr.A01832	Eucgr.A01832.1	1.2	2.3		AT4G28390.1	AAC3,ATAAC3	ADP/ATP carrier 3
Eucgr.K01045	Eucgr.K01045.1	-0.34	-0.13		AT4G28390.1	AAC3,ATAAC3	ADP/ATP carrier 3
Eucgr.B03361	Eucgr.B03361.1	-0.35	-1.6		AT4G28390.1	AAC3,ATAAC3	ADP/ATP carrier 3
Eucgr.L00275	Eucgr.L00275.1	3	3.3	GO:0016779,GO:0009058	AT1G27680.1	APL2	ADPGLC-PPase large subunit
Eucgr.B03259	Eucgr.B03259.1	0.56	0.65	GO:0016779,GO:0009058	AT1G27680.1	APL2	ADPGLC-PPase large subunit
Eucgr.C03089	Eucgr.C03089.1	0.29	0.53	GO:0016779,GO:0009058	AT1G27680.1	APL2	ADPGLC-PPase large subunit
Eucgr.F01590	Eucgr.F01590.2	-0.012	0.3	GO:0016779,GO:0009058	AT1G27680.1	APL2	ADPGLC-PPase large subunit
Eucgr.F01590	Eucgr.F01590.1	-0.012	0.3	GO:0016779,GO:0009058	AT1G27680.1	APL2	ADPGLC-PPase large subunit
Eucgr.E03793	Eucgr.E03793.1	-0.31	-1.5	GO:0016779,GO:0009058	AT1G27680.1	APL2	ADPGLC-PPase large subunit
Eucgr.K00547	Eucgr.K00547.1	-0.7	-0.6	GO:0016779,GO:0009058	AT1G27680.1	APL2	ADPGLC-PPase large subunit
Eucgr.I01880	Eucgr.I01880.1	0.24	0.26	GO:0016779,GO:0009058	AT1G74910.1		ADP-glucose pyrophosphorylase family protein
Eucgr.I01880	Eucgr.I01880.2	0.24	0.26	GO:0016779,GO:0009058	AT1G74910.1		ADP-glucose pyrophosphorylase family protein
Eucgr.I01880	Eucgr.I01880.4	0.24	0.26	GO:0016779,GO:0009058	AT1G74910.1		ADP-glucose pyrophosphorylase family protein
Eucgr.I01880	Eucgr.I01880.3	0.24	0.26	GO:0016779,GO:0009058	AT1G74910.2		ADP-glucose pyrophosphorylase family protein
Eucgr.I01880	Eucgr.I01880.5	0.24	0.26	GO:0016779,GO:0009058	AT1G74910.2		ADP-glucose pyrophosphorylase family protein
Eucgr.K02882	Eucgr.K02882.2	-0.15	0.067		AT1G74910.2		ADP-glucose pyrophosphorylase family protein
Eucgr.K02882	Eucgr.K02882.1	-0.15	0.067	GO:0016779,GO:0009058	AT1G74910.2		ADP-glucose pyrophosphorylase family protein
Eucgr.K02882	Eucgr.K02882.3	-0.15	0.067		AT1G74910.1		ADP-glucose pyrophosphorylase family protein
Eucgr.K02882	Eucgr.K02882.4	-0.15	0.067		AT1G74910.2		ADP-glucose pyrophosphorylase family protein
Eucgr.A00322	Eucgr.A00322.1	-1	-1.3	GO:0016779,GO:0009058	AT1G05610.1	APS2	ADP-glucose pyrophosphorylase small subunit 2
Eucgr.A00411	Eucgr.A00411.1	-1.3	-0.65	GO:0016779,GO:0009058	AT1G05610.1	APS2	ADP-glucose pyrophosphorylase small subunit 2
Eucgr.C02422	Eucgr.C02422.1	-0.0041	0.069	GO:0007264,GO:0005525	AT2G24765.1	ARF3,ARL1,ATARL1	ADP-ribosylation factor 3
Eucgr.H02222	Eucgr.H02222.4	1.6	0.083		AT5G14670.1	ARFA1B,ATARFA1B	ADP-ribosylation factor A1B
Eucgr.H02224	Eucgr.H02224.2	0.2	0.37		AT5G14670.1	ARFA1B,ATARFA1B	ADP-ribosylation factor A1B
Eucgr.H02224	Eucgr.H02224.1	0.2	0.37		AT5G14670.1	ARFA1B,ATARFA1B	ADP-ribosylation factor A1B
Eucgr.I01779	Eucgr.I01779.1	-0.41	-0.37		AT5G14670.1	ARFA1B,ATARFA1B	ADP-ribosylation factor A1B
Eucgr.I01779	Eucgr.I01779.2	-0.41	-0.37		AT5G14670.1	ARFA1B,ATARFA1B	ADP-ribosylation factor A1B
Eucgr.H02222	Eucgr.H02222.3	1.6	0.083		AT1G10630.1	ARFA1F,ATARFA1F	ADP-ribosylation factor A1F
Eucgr.H02222	Eucgr.H02222.2	1.6	0.083		AT1G10630.1	ARFA1F,ATARFA1F	ADP-ribosylation factor A1F
Eucgr.H02222	Eucgr.H02222.1	1.6	0.083		AT1G10630.1	ARFA1F,ATARFA1F	ADP-ribosylation factor A1F
Eucgr.I01780	Eucgr.I01780.2	0.08	-0.089		AT1G10630.1	ARFA1F,ATARFA1F	ADP-ribosylation factor A1F
Eucgr.I01780	Eucgr.I01780.3	0.08	-0.089		AT1G10630.1	ARFA1F,ATARFA1F	ADP-ribosylation factor A1F
Eucgr.I01780	Eucgr.I01780.1	0.08	-0.089		AT1G10630.1	ARFA1F,ATARFA1F	ADP-ribosylation factor A1F
Eucgr.L02942	Eucgr.L02942.1	-0.33	-0.41		AT1G10630.1	ARFA1F,ATARFA1F	ADP-ribosylation factor A1F
Eucgr.I01779	Eucgr.I01779.6	-0.41	-0.37		AT1G10630.1	ARFA1F,ATARFA1F	ADP-ribosylation factor A1F
Eucgr.I01779	Eucgr.I01779.7	-0.41	-0.37	GO:0007264,GO:0005525	AT1G10630.1	ARFA1F,ATARFA1F	ADP-ribosylation factor A1F
Eucgr.I01779	Eucgr.I01779.4	-0.41	-0.37		AT1G10630.1	ARFA1F,ATARFA1F	ADP-ribosylation factor A1F
Eucgr.I01779	Eucgr.I01779.8	-0.41	-0.37	GO:0005525	AT1G10630.1	ARFA1F,ATARFA1F	ADP-ribosylation factor A1F
Eucgr.I01779	Eucgr.I01779.3	-0.41	-0.37		AT1G10630.1	ARFA1F,ATARFA1F	ADP-ribosylation factor A1F
Eucgr.I01779	Eucgr.I01779.5	-0.41	-0.37		AT1G10630.1	ARFA1F,ATARFA1F	ADP-ribosylation factor A1F
Eucgr.A02963	Eucgr.A02963.1	0.033	0.14	GO:0007264,GO:0005525	AT5G17060.1	ARFB1B,ATARFB1B	ADP-ribosylation factor B1B
Eucgr.A02963	Eucgr.A02963.2	0.033	0.14	GO:0007264,GO:0005525	AT3G03120.1	ARFB1C,ATARFB1C	ADP-ribosylation factor B1C
Eucgr.H00507	Eucgr.H00507.3	0.13	-0.11	GO:0007264,GO:0005525	AT3G22950.2	ARFC1,ATARFC1	ADP-ribosylation factor C1
Eucgr.H00507	Eucgr.H00507.2	0.13	-0.11	GO:0007264,GO:0005525	AT3G22950.2	ARFC1,ATARFC1	ADP-ribosylation factor C1
Eucgr.H00507	Eucgr.H00507.1	0.13	-0.11	GO:0007264,GO:0005525	AT3G22950.2	ARFC1,ATARFC1	ADP-ribosylation factor C1
Eucgr.H03225	Eucgr.H03225.1	0.68	1	GO:0005525	AT1G02430.1	ARFD1B,ATARFD1B	ADP-ribosylation factor D1B
Eucgr.D02615	Eucgr.D02615.1	-0.17	-0.33	GO:0007264,GO:0005525	AT2G18390.1	ARL2,ATARLC1,HAL,TTN5	ADP-ribosylation factor family protein
Eucgr.D02615	Eucgr.D02615.2	-0.17	-0.33	GO:0007264,GO:0005525	AT2G18390.1	ARL2,ATARLC1,HAL,TTN5	ADP-ribosylation factor family protein
Eucgr.D02615	Eucgr.D02615.3	-0.17	-0.33	GO:0007264,GO:0005525	AT2G18390.1	ARL2,ATARLC1,HAL,TTN5	ADP-ribosylation factor family protein
Eucgr.J01603	Eucgr.J01603.1	0.91	0.25	GO:0007264,GO:0005525	AT5G37680.1	ARLA1A,ATARLA1A	ADP-ribosylation factor-like A1A
Eucgr.I00699	Eucgr.I00699.1	-0.014	-0.32	GO:0007264,GO:0005525	AT3G49870.1	ARLA1C,ATARLA1C	ADP-ribosylation factor-like A1C
Eucgr.F02383	Eucgr.F02383.1	-0.74	-0.1	GO:0043531	AT4G33300.1	ADR1-L1	ADR1-like 1
Eucgr.C00153	Eucgr.C00153.4	-0.17	-0.00045		AT5G57410.3		Afadin/alpha-actinin-binding protein
Eucgr.C00153	Eucgr.C00153.2	-0.17	-0.00045		AT5G57410.3		Afadin/alpha-actinin-binding protein
Eucgr.C00153	Eucgr.C00153.1	-0.17	-0.00045		AT5G57410.3		Afadin/alpha-actinin-binding protein
Eucgr.C00153	Eucgr.C00153.3	-0.17	-0.00045		AT5G57410.3		Afadin/alpha-actinin-binding protein
Eucgr.C00153	Eucgr.C00153.5	-0.17	-0.00045		AT5G57410.3		Afadin/alpha-actinin-binding protein
Eucgr.C02795	Eucgr.C02795.1	1.6	2	GO:0005524	AT2G25530.1		AFG1-like ATPase family protein
Eucgr.C02791	Eucgr.C02791.1	0.36	0.0058	GO:0005524	AT2G25530.1		AFG1-like ATPase family protein
Eucgr.C01238	Eucgr.C01238.1	0.12	-0.14	GO:0005524	AT4G30490.1		AFG1-like ATPase family protein
Eucgr.C01238	Eucgr.C01238.2	0.12	-0.14	GO:0005524	AT4G30490.1		AFG1-like ATPase family protein
Eucgr.C01238	Eucgr.C01238.4	0.12	-0.14	GO:0005524	AT4G30490.1		AFG1-like ATPase family protein
Eucgr.C01238	Eucgr.C01238.3	0.12	-0.14	GO:0005524	AT4G30490.1		AFG1-like ATPase family protein
Eucgr.F02956	Eucgr.F02956.1	1.3	-0.77	GO:0006355,GO:0005634,GO:0003700,GO:0046983,GO:0003677	AT1G71692.1	AGL12,XAL1	AGAMOUS-like 12
Eucgr.L01183	Eucgr.L01183.1	5.7	4.1	GO:0046983,GO:0003677	AT4G11880.1	AGL14	AGAMOUS-like 14
Eucgr.L03029	Eucgr.L03029.1	4.1	2.7	GO:0046983,GO:0003677	AT4G11880.1	AGL14	AGAMOUS-like 14
Eucgr.F02403	Eucgr.F02403.1	2.7	-0.87	GO:0046983,GO:0003677	AT4G11880.1	AGL14	AGAMOUS-like 14
Eucgr.I02048	Eucgr.I02048.1	2.3	-1.9	GO:0046983,GO:0003677	AT4G11880.1	AGL14	AGAMOUS-like 14
Eucgr.D02425	Eucgr.D02425.1	-0.68	-0.51	GO:0046983,GO:0003677	AT4G11880.1	AGL14	AGAMOUS-like 14
Eucgr.J03007	Eucgr.J03007.1	-1.9	-2.7	GO:0046983,GO:0003677	AT4G11880.1	AGL14	AGAMOUS-like 14
Eucgr.G03284	Eucgr.G03284.1	-0.3	-0.82	GO:0006355,GO:0005634,GO:0003700,GO:0046983,GO:0003677	AT5G13790.1	AGL15	AGAMOUS-like 15
Eucgr.F02162	Eucgr.F02162.2	2.6	0.93	GO:0006355,GO:0005634,GO:0003700	AT3G57230.1	AGL16	AGAMOUS-like 16
Eucgr.F02162	Eucgr.F02162.1	2.6	0.93	GO:0006355,GO:0005634,GO:0003700	AT3G57230.1	AGL16	AGAMOUS-like 16
Eucgr.F02161	Eucgr.F02161.1	0.75	-0.07	GO:0046983,GO:0003677,GO:2000029,GO:0048481,GO:0048316,GO:0003700	AT3G57230.1	AGL16	AGAMOUS-like 16
Eucgr.I02599	Eucgr.I02599.1	0.58	-1	GO:0006355,GO:0005634,GO:0003700	AT3G57230.1	AGL16	AGAMOUS-like 16
Eucgr.I02596	Eucgr.I02596.1	-0.12	0.77	GO:0046983,GO:0003677	AT3G57230.1	AGL16	AGAMOUS-like 16
Eucgr.F00448	Eucgr.F00448.1	-0.2	-0.6	GO:0006355,GO:0005634,GO:0003700	AT3G57230.1	AGL16	AGAMOUS-like 16
Eucgr.G01037	Eucgr.G01037.1	-0.51	-1.4	GO:0006355,GO:0005634,GO:0003700	AT3G57230.2	AGL16	AGAMOUS-like 16
Eucgr.I02593	Eucgr.I02593.1	-0.9	0.055	GO:0046983,GO:0003677,GO:0006355,GO:0005634,GO:0003700	AT3G57230.2	AGL16	AGAMOUS-like 16
Eucgr.H02430	Eucgr.H02430.1	2.1	0.52	GO:0006355,GO:0005634,GO:0003700	AT2G22630.1	AGL17	AGAMOUS-like 17
Eucgr.D01939	Eucgr.D01939.1	0.2	0.14	GO:0006355,GO:0005634,GO:0003700,GO:0046983,GO:0003677	AT4G22950.1	AGL19,GL19	AGAMOUS-like 19
Eucgr.D01939	Eucgr.D01939.2	0.2	0.14	GO:0006355,GO:0005634,GO:0003700,GO:0046983,GO:0003677	AT4G22950.1	AGL19,GL19	AGAMOUS-like 19
Eucgr.E00516	Eucgr.E00516.2	-1.9	-1.2	GO:0006355,GO:0005634,GO:0003700,GO:0046983,GO:0003677	AT4G22950.1	AGL19,GL19	AGAMOUS-like 19
Eucgr.E00516	Eucgr.E00516.1	-1.9	-1.2	GO:0006355,GO:0005634,GO:0003700,GO:0046983,GO:0003677	AT4G22950.1	AGL19,GL19	AGAMOUS-like 19
Eucgr.A02846	Eucgr.A02846.6	6.1	0	GO:0006355,GO:0005634,GO:0003700,GO:0046983,GO:0003677	AT2G45660.1	AGL20,ATSOC1,SOC1	AGAMOUS-like 20
Eucgr.C01942	Eucgr.C01942.1	0.52	-0.96	GO:0046983,GO:0003677	AT2G45660.1	AGL20,ATSOC1,SOC1	AGAMOUS-like 20
Eucgr.D02427	Eucgr.D02427.1	0.11	0.18	GO:0006355,GO:0005634,GO:0003700	AT2G45660.1	AGL20,ATSOC1,SOC1	AGAMOUS-like 20
Eucgr.I02598	Eucgr.I02598.1	2.7	1.9	GO:0046983,GO:0003677	AT4G37940.1	AGL21	AGAMOUS-like 21
Eucgr.C02714	Eucgr.C02714.1	0	0	GO:0006355,GO:0005634,GO:0003700	AT4G24540.1	AGL24	AGAMOUS-like 24
Eucgr.F02145	Eucgr.F02145.2	-2.7	-3.5	GO:0006355,GO:0005634,GO:0003700,GO:0046983,GO:0003677	AT4G24540.1	AGL24	AGAMOUS-like 24
Eucgr.F02145	Eucgr.F02145.1	-2.7	-3.5	GO:0006355,GO:0005634,GO:0003700,GO:0046983,GO:0003677	AT4G24540.1	AGL24	AGAMOUS-like 24
Eucgr.G03394	Eucgr.G03394.2	0.1	0.057	GO:0008173,GO:0006396,GO:0003723	AT5G26880.2	AGL26	AGAMOUS-like 26
Eucgr.G03394	Eucgr.G03394.1	0.1	0.057	GO:0008173,GO:0006396,GO:0003723	AT5G26880.2	AGL26	AGAMOUS-like 26
Eucgr.D00311	Eucgr.D00311.1	4.7	0	GO:0046983,GO:0003677	AT2G34440.1	AGL29	AGAMOUS-like 29
Eucgr.D00313	Eucgr.D00313.1	0	0	GO:0046983,GO:0003677	AT2G34440.1	AGL29	AGAMOUS-like 29
Eucgr.B03511	Eucgr.B03511.1	2.5	1.3	GO:0006355,GO:0005634,GO:0003700	AT5G65050.2	AGL31,MAF2	AGAMOUS-like 31
Eucgr.A02846	Eucgr.A02846.3	6.1	0	GO:0006355,GO:0005634,GO:0003700,GO:0046983,GO:0003677	AT5G62165.1	AGL42	AGAMOUS-like 42
Eucgr.A02846	Eucgr.A02846.2	6.1	0	GO:0006355,GO:0005634,GO:0003700,GO:0046983,GO:0003677	AT5G62165.1	AGL42	AGAMOUS-like 42
Eucgr.A02846	Eucgr.A02846.4	6.1	0	GO:0006355,GO:0005634,GO:0003700,GO:0046983,GO:0003677	AT5G62165.3	AGL42	AGAMOUS-like 42
Eucgr.A02846	Eucgr.A02846.1	6.1	0	GO:0006355,GO:0005634,GO:0003700,GO:0046983,GO:0003677	AT5G62165.1	AGL42	AGAMOUS-like 42
Eucgr.A02846	Eucgr.A02846.5	6.1	0	GO:0006355,GO:0005634,GO:0003700	AT5G62165.3	AGL42	AGAMOUS-like 42
Eucgr.I02600	Eucgr.I02600.1	1.6	1.8	GO:0046983,GO:0003677,GO:2000029,GO:0048481,GO:0048316,GO:0003700	AT2G14210.1	AGL44,ANR1	AGAMOUS-like 44
Eucgr.E01330	Eucgr.E01330.1	3.2	3.2	GO:0046983,GO:0003677,GO:0006355,GO:0005634,GO:0003700	AT2G45650.1	AGL6	AGAMOUS-like 6
Eucgr.E01330	Eucgr.E01330.2	3.2	3.2	GO:0046983,GO:0003677,GO:0006355,GO:0005634,GO:0003700	AT2G45650.1	AGL6	AGAMOUS-like 6
Eucgr.B01369	Eucgr.B01369.1	-2	0.64	GO:0046983,GO:0003677	AT2G24840.1	AGL61,DIA	AGAMOUS-like 61
Eucgr.B00522	Eucgr.B00522.2	0.62	0.18	GO:0046983,GO:0003677	AT1G18750.1	AGL65	AGAMOUS-like 65
Eucgr.B00522	Eucgr.B00522.1	0.62	0.18	GO:0046983,GO:0003677	AT1G18750.1	AGL65	AGAMOUS-like 65
Eucgr.B00522	Eucgr.B00522.3	0.62	0.18	GO:0046983,GO:0003677	AT1G18750.1	AGL65	AGAMOUS-like 65
Eucgr.B00634	Eucgr.B00634.1	0	0	GO:0046983,GO:0003677,GO:0006355,GO:0005634,GO:0003700	AT5G60910.1	AGL8,FUL	AGAMOUS-like 8
Eucgr.B00634	Eucgr.B00634.2	0	0	GO:0006355,GO:0005634,GO:0003700,GO:0046983,GO:0003677	AT5G60910.1	AGL8,FUL	AGAMOUS-like 8
Eucgr.K02547	Eucgr.K02547.2	-0.66	0.2	GO:0046983,GO:0003677,GO:0006355,GO:0005634,GO:0003700	AT5G60910.1	AGL8,FUL	AGAMOUS-like 8
Eucgr.K02547	Eucgr.K02547.1	-0.66	0.2	GO:0046983,GO:0003677,GO:0006355,GO:0005634,GO:0003700	AT5G60910.1	AGL8,FUL	AGAMOUS-like 8
Eucgr.I02059	Eucgr.I02059.1	-1.2	0.51	GO:0046983,GO:0003677,GO:0006355,GO:0005634,GO:0003700	AT5G60910.1	AGL8,FUL	AGAMOUS-like 8
Eucgr.E01734	Eucgr.E01734.1	0	4.5	GO:0046983,GO:0003677	AT5G48670.1	AGL80,FEM111	AGAMOUS-like 80
Eucgr.E01733	Eucgr.E01733.1	-2.1	2.3	GO:0046983,GO:0003677	AT5G48670.1	AGL80,FEM111	AGAMOUS-like 80
Eucgr.C03408	Eucgr.C03408.1	1.7	0.43	GO:0006468,GO:0005524,GO:0004674,GO:0004672	AT4G33080.1		AGC (cAMP-dependent, cGMP-dependent and protein kinase C) kinase family protein
Eucgr.C03408	Eucgr.C03408.2	1.7	0.43	GO:0006468,GO:0005524,GO:0004674,GO:0004672	AT4G33080.1		AGC (cAMP-dependent, cGMP-dependent and protein kinase C) kinase family protein
Eucgr.H00745	Eucgr.H00745.1	0.9	0.025	GO:0006468,GO:0005524,GO:0004672	AT3G25250.1	AGC2,AGC2-1,AtOXI1,OXI1	AGC (cAMP-dependent, cGMP-dependent and protein kinase C) kinase family protein
Eucgr.B01564	Eucgr.B01564.2	0.47	0.2	GO:0006468,GO:0005524,GO:0004674,GO:0004672	AT3G23310.1		AGC (cAMP-dependent, cGMP-dependent and protein kinase C) kinase family protein
Eucgr.B01564	Eucgr.B01564.1	0.47	0.2	GO:0006468,GO:0005524,GO:0004674,GO:0004672	AT3G23310.1		AGC (cAMP-dependent, cGMP-dependent and protein kinase C) kinase family protein
Eucgr.C03064	Eucgr.C03064.1	-0.065	0.17	GO:0006468,GO:0005524,GO:0004674,GO:0004672	AT4G33080.2		AGC (cAMP-dependent, cGMP-dependent and protein kinase C) kinase family protein
Eucgr.H03032	Eucgr.H03032.1	-0.081	-0.048	GO:0006468,GO:0004672	AT4G14350.1		AGC (cAMP-dependent, cGMP-dependent and protein kinase C) kinase family protein
Eucgr.A02879	Eucgr.A02879.1	-0.89	-0.29	GO:0006468,GO:0004672	AT5G62310.1	IRE	AGC (cAMP-dependent, cGMP-dependent and protein kinase C) kinase family protein
Eucgr.C04178	Eucgr.C04178.1	-2	-0.63	GO:0006468,GO:0005524,GO:0004672	AT2G26700.1	PID2	AGC (cAMP-dependent, cGMP-dependent and protein kinase C) kinase family protein
Eucgr.F04483	Eucgr.F04483.1	-1.8	-0.15	GO:0006468,GO:0004672,GO:0005524	AT3G12690.3	AGC1.5	AGC kinase 1.5
Eucgr.H03148	Eucgr.H03148.2	1	0.16		AT5G52070.1		Agenet domain-containing protein
Eucgr.H03148	Eucgr.H03148.1	1	0.16		AT5G52070.1		Agenet domain-containing protein
Eucgr.E01742	Eucgr.E01742.1	0.21	-0.2		AT1G09320.1		agenet domain-containing protein
Eucgr.H04076	Eucgr.H04076.1	-0.37	0.12		AT1G09320.1		agenet domain-containing protein
Eucgr.H04076	Eucgr.H04076.4	-0.37	0.12		AT1G09320.1		agenet domain-containing protein
Eucgr.H04076	Eucgr.H04076.2	-0.37	0.12		AT1G09320.1		agenet domain-containing protein
Eucgr.H04076	Eucgr.H04076.3	-0.37	0.12		AT1G09320.1		agenet domain-containing protein
Eucgr.B01689	Eucgr.B01689.1	-1.6	-1.1		AT1G09320.1		agenet domain-containing protein
Eucgr.L00253	Eucgr.L00253.1	-1.8	-0.41		AT1G09320.1		agenet domain-containing protein
Eucgr.F03695	Eucgr.F03695.1	0.13	-0.14	GO:0003682	AT5G55600.2		agenet domain-containing protein / bromo-adjacent homology (BAH) domain-containing protein
Eucgr.B03027	Eucgr.B03027.1	0.059	-0.12	GO:0003682	AT1G68580.2		agenet domain-containing protein / bromo-adjacent homology (BAH) domain-containing protein
Eucgr.B03027	Eucgr.B03027.2	0.059	-0.12	GO:0003682	AT1G68580.2		agenet domain-containing protein / bromo-adjacent homology (BAH) domain-containing protein
Eucgr.D01444	Eucgr.D01444.1	0.015	0.08	GO:0003682	AT5G55600.3		agenet domain-containing protein / bromo-adjacent homology (BAH) domain-containing protein
Eucgr.A02465	Eucgr.A02465.1	0.15	-0.1	GO:0006950,GO:0051087,GO:0001671	AT3G12050.1		Aha1 domain-containing protein
Eucgr.A00697	Eucgr.A00697.1	1.7	0.064	GO:0006164,GO:0004643,GO:0003937	AT2G35040.1		AICARFT/IMPCHase bienzyme family protein
Eucgr.A00697	Eucgr.A00697.2	1.7	0.064	GO:0006164,GO:0004643,GO:0003937	AT2G35040.1		AICARFT/IMPCHase bienzyme family protein
Eucgr.L01257	Eucgr.L01257.1	0.97	0.78	GO:0006164,GO:0004643,GO:0003937	AT2G35040.1		AICARFT/IMPCHase bienzyme family protein
Eucgr.A00699	Eucgr.A00699.1	0.62	1.9	GO:0006164,GO:0004643,GO:0003937	AT2G35040.1		AICARFT/IMPCHase bienzyme family protein
Eucgr.A00733	Eucgr.A00733.1	0.059	-0.31	GO:0006164,GO:0004643,GO:0003937	AT2G35040.1		AICARFT/IMPCHase bienzyme family protein
Eucgr.A00708	Eucgr.A00708.1	-0.41	0.31	GO:0006164,GO:0004643,GO:0003937	AT2G35040.1		AICARFT/IMPCHase bienzyme family protein
Eucgr.A00705	Eucgr.A00705.1	-1.3	1.4	GO:0006164,GO:0004643,GO:0003937	AT2G35040.2		AICARFT/IMPCHase bienzyme family protein
Eucgr.C03983	Eucgr.C03983.3	0.28	0.23		AT2G24390.1		AIG2-like (avirulence induced gene) family protein
Eucgr.C03983	Eucgr.C03983.2	0.28	0.23		AT2G24390.1		AIG2-like (avirulence induced gene) family protein
Eucgr.C03983	Eucgr.C03983.1	0.28	0.23		AT2G24390.1		AIG2-like (avirulence induced gene) family protein
Eucgr.C03983	Eucgr.C03983.4	0.28	0.23		AT2G24390.1		AIG2-like (avirulence induced gene) family protein
Eucgr.D02204	Eucgr.D02204.1	0.0036	0.25		AT5G46720.1		AIG2-like (avirulence induced gene) family protein
Eucgr.D02204	Eucgr.D02204.2	0.0036	0.25		AT5G46720.1		AIG2-like (avirulence induced gene) family protein
Eucgr.A02988	Eucgr.A02988.1	-0.4	-0.23		AT3G02910.1		AIG2-like (avirulence induced gene) family protein
Eucgr.C02333	Eucgr.C02333.1	0.79	0.08	GO:0006355,GO:0003700,GO:0007275	AT5G57390.1	AIL5,CHO1,EMK	AINTEGUMENTA-like 5
Eucgr.B03412	Eucgr.B03412.1	-4.4	-2.2	GO:0006355,GO:0003700,GO:0007275	AT5G57390.1	AIL5,CHO1,EMK	AINTEGUMENTA-like 5
Eucgr.I00564	Eucgr.I00564.1	-0.05	-0.23	GO:0006355,GO:0003700,GO:0007275	AT5G10510.2	AIL6,PLT3	AINTEGUMENTA-like 6
Eucgr.I02163	Eucgr.I02163.1	-0.15	-0.2	GO:0030170,GO:0009058	AT1G72330.1	ALAAT2	alanine aminotransferase 2
Eucgr.B03720	Eucgr.B03720.1	0.16	-0.22		AT2G13360.2	AGT,AGT1,SGAT	alanine:glyoxylate aminotransferase
Eucgr.H04825	Eucgr.H04825.1	-0.53	-0.11	GO:0030170,GO:0008483	AT4G39660.1	AGT2	alanine:glyoxylate aminotransferase 2
Eucgr.B01310	Eucgr.B01310.3	1.1	0.7	GO:0006419,GO:0005524,GO:0004813,GO:0000166	AT3G16565.2		alanine-tRNA ligases;nucleic acid binding;ligases, forming aminoacyl-tRNA and related compounds;nucleotide binding;ATP binding
Eucgr.B01310	Eucgr.B01310.2	1.1	0.7	GO:0006419,GO:0005524,GO:0004813,GO:0000166	AT3G16565.2		alanine-tRNA ligases;nucleic acid binding;ligases, forming aminoacyl-tRNA and related compounds;nucleotide binding;ATP binding
Eucgr.B01310	Eucgr.B01310.1	1.1	0.7	GO:0006419,GO:0005524,GO:0004813,GO:0000166	AT3G16565.2		alanine-tRNA ligases;nucleic acid binding;ligases, forming aminoacyl-tRNA and related compounds;nucleotide binding;ATP binding
Eucgr.B01310	Eucgr.B01310.4	1.1	0.7	GO:0006419,GO:0005524,GO:0004813,GO:0000166	AT3G16565.2		alanine-tRNA ligases;nucleic acid binding;ligases, forming aminoacyl-tRNA and related compounds;nucleotide binding;ATP binding
Eucgr.J00856	Eucgr.J00856.1	-0.063	0.07	GO:0043039,GO:0016876,GO:0005524,GO:0006419,GO:0004813,GO:0000166	AT1G50200.1	ACD,ALATS	Alanyl-tRNA synthetase
Eucgr.I01492	Eucgr.I01492.1	-0.055	-0.0035	GO:0003676,GO:0043039,GO:0016876,GO:0005524,GO:0006419,GO:0004813,GO:0000166	AT5G22800.1	EMB1030,EMB263,EMB86	Alanyl-tRNA synthetase, class IIc
Eucgr.F01689	Eucgr.F01689.3	0.43	0.19	GO:0003676	AT1G76010.1		Alba DNA/RNA-binding protein
Eucgr.F01689	Eucgr.F01689.1	0.43	0.19	GO:0003676	AT1G76010.1		Alba DNA/RNA-binding protein
Eucgr.F01689	Eucgr.F01689.2	0.43	0.19	GO:0003676	AT1G76010.1		Alba DNA/RNA-binding protein
Eucgr.H00805	Eucgr.H00805.1	0.25	0.32	GO:0003676	AT3G07030.1		Alba DNA/RNA-binding protein
Eucgr.F02537	Eucgr.F02537.1	0.072	-0.008	GO:0003676	AT2G34160.1		Alba DNA/RNA-binding protein
Eucgr.F03720	Eucgr.F03720.2	-0.037	-0.15	GO:0003676	AT1G76010.1		Alba DNA/RNA-binding protein
Eucgr.F03720	Eucgr.F03720.1	-0.037	-0.15	GO:0003676	AT1G76010.1		Alba DNA/RNA-binding protein
Eucgr.C04193	Eucgr.C04193.1	-0.39	-0.25	GO:0003676	AT2G34160.1		Alba DNA/RNA-binding protein
Eucgr.K03602	Eucgr.K03602.1	-0.49	-0.27	GO:0003676	AT3G07030.1		Alba DNA/RNA-binding protein
Eucgr.J00729	Eucgr.J00729.4	-0.018	-0.021	GO:0016851,GO:0015995,GO:0015979	AT1G08520.1	ALB-1V,ALB1,CHLD,PDE166,V157	ALBINA 1
Eucgr.J00729	Eucgr.J00729.3	-0.018	-0.021	GO:0016851,GO:0015995,GO:0015979	AT1G08520.1	ALB-1V,ALB1,CHLD,PDE166,V157	ALBINA 1
Eucgr.J00729	Eucgr.J00729.2	-0.018	-0.021	GO:0016851,GO:0015995,GO:0015979	AT1G08520.1	ALB-1V,ALB1,CHLD,PDE166,V157	ALBINA 1
Eucgr.J00729	Eucgr.J00729.1	-0.018	-0.021	GO:0016851,GO:0015995,GO:0015979	AT1G08520.1	ALB-1V,ALB1,CHLD,PDE166,V157	ALBINA 1
Eucgr.A01004	Eucgr.A01004.2	0.049	-0.06	GO:0017038,GO:0016020,GO:0005524	AT4G01800.1	AGY1,AtcpSecA	Albino or Glassy Yellow 1
Eucgr.A01004	Eucgr.A01004.1	0.049	-0.06	GO:0017038,GO:0016020,GO:0005524	AT4G01800.1	AGY1,AtcpSecA	Albino or Glassy Yellow 1
Eucgr.A01004	Eucgr.A01004.3	0.049	-0.06	GO:0017038,GO:0016020,GO:0005524	AT4G01800.1	AGY1,AtcpSecA	Albino or Glassy Yellow 1
Eucgr.A00522	Eucgr.A00522.1	1.9	0.68		AT5G01370.1	ACI1	ALC-interacting protein 1
Eucgr.I00224	Eucgr.I00224.5	1.8	-0.071	GO:0055114,GO:0016491,GO:0008270	AT1G77120.1	ADH,ADH1,ATADH,ATADH1	alcohol dehydrogenase 1
Eucgr.I00224	Eucgr.I00224.6	1.8	-0.071	GO:0055114,GO:0016491,GO:0008270	AT1G77120.1	ADH,ADH1,ATADH,ATADH1	alcohol dehydrogenase 1
Eucgr.I00224	Eucgr.I00224.2	1.8	-0.071	GO:0055114,GO:0016491,GO:0008270	AT1G77120.1	ADH,ADH1,ATADH,ATADH1	alcohol dehydrogenase 1
Eucgr.I00224	Eucgr.I00224.1	1.8	-0.071	GO:0055114,GO:0016491,GO:0008270	AT1G77120.1	ADH,ADH1,ATADH,ATADH1	alcohol dehydrogenase 1
Eucgr.I00224	Eucgr.I00224.4	1.8	-0.071	GO:0055114,GO:0016491,GO:0008270	AT1G77120.1	ADH,ADH1,ATADH,ATADH1	alcohol dehydrogenase 1
Eucgr.I00224	Eucgr.I00224.8	1.8	-0.071	GO:0055114,GO:0016491,GO:0008270	AT1G77120.1	ADH,ADH1,ATADH,ATADH1	alcohol dehydrogenase 1
Eucgr.I00224	Eucgr.I00224.3	1.8	-0.071	GO:0055114,GO:0016491,GO:0008270	AT1G77120.1	ADH,ADH1,ATADH,ATADH1	alcohol dehydrogenase 1
Eucgr.I00224	Eucgr.I00224.7	1.8	-0.071	GO:0055114,GO:0016491,GO:0008270	AT1G77120.1	ADH,ADH1,ATADH,ATADH1	alcohol dehydrogenase 1
Eucgr.K03599	Eucgr.K03599.2	0.61	0.55	GO:0055114,GO:0016491,GO:0008270	AT1G77120.1	ADH,ADH1,ATADH,ATADH1	alcohol dehydrogenase 1
Eucgr.K03599	Eucgr.K03599.1	0.61	0.55	GO:0055114,GO:0016491,GO:0008270	AT1G77120.1	ADH,ADH1,ATADH,ATADH1	alcohol dehydrogenase 1
Eucgr.K01401	Eucgr.K01401.2	-0.2	-0.42	GO:0055114,GO:0016491,GO:0008270	AT1G77120.1	ADH,ADH1,ATADH,ATADH1	alcohol dehydrogenase 1
Eucgr.F02744	Eucgr.F02744.1	-0.7	0.38	GO:0055114,GO:0016491,GO:0008270	AT1G77120.1	ADH,ADH1,ATADH,ATADH1	alcohol dehydrogenase 1
Eucgr.F02744	Eucgr.F02744.4	-0.7	0.38	GO:0055114,GO:0016491,GO:0008270	AT1G77120.1	ADH,ADH1,ATADH,ATADH1	alcohol dehydrogenase 1
Eucgr.F02744	Eucgr.F02744.5	-0.7	0.38	GO:0055114,GO:0016491,GO:0008270	AT1G77120.1	ADH,ADH1,ATADH,ATADH1	alcohol dehydrogenase 1
Eucgr.F02744	Eucgr.F02744.6	-0.7	0.38	GO:0055114,GO:0016491,GO:0008270	AT1G77120.1	ADH,ADH1,ATADH,ATADH1	alcohol dehydrogenase 1
Eucgr.F02744	Eucgr.F02744.3	-0.7	0.38	GO:0055114,GO:0016491,GO:0008270	AT1G77120.1	ADH,ADH1,ATADH,ATADH1	alcohol dehydrogenase 1
Eucgr.F02744	Eucgr.F02744.2	-0.7	0.38	GO:0055114,GO:0016491,GO:0008270	AT1G77120.1	ADH,ADH1,ATADH,ATADH1	alcohol dehydrogenase 1
Eucgr.H04952	Eucgr.H04952.1	-1.4	-0.9	GO:0055114,GO:0016491,GO:0008270	AT1G77120.1	ADH,ADH1,ATADH,ATADH1	alcohol dehydrogenase 1
Eucgr.H04950	Eucgr.H04950.1	-1.8	-0.58	GO:0055114,GO:0016491,GO:0008270	AT1G77120.1	ADH,ADH1,ATADH,ATADH1	alcohol dehydrogenase 1
Eucgr.H04951	Eucgr.H04951.1	-2.3	-0.32	GO:0055114,GO:0016491,GO:0008270	AT1G77120.1	ADH,ADH1,ATADH,ATADH1	alcohol dehydrogenase 1
Eucgr.C01064	Eucgr.C01064.1	1.3	0.19		AT3G24490.1		Alcohol dehydrogenase transcription factor Myb/SANT-like family protein
Eucgr.E01658	Eucgr.E01658.1	0.59	0.073		AT2G44730.1		Alcohol dehydrogenase transcription factor Myb/SANT-like family protein
Eucgr.J02994	Eucgr.J02994.1	-0.17	-0.15		AT3G24490.1		Alcohol dehydrogenase transcription factor Myb/SANT-like family protein
Eucgr.A00307	Eucgr.A00307.1	-10	0.39		AT3G24490.1		Alcohol dehydrogenase transcription factor Myb/SANT-like family protein
Eucgr.I02605	Eucgr.I02605.4	0.52	0.63	GO:0055114,GO:0016491,GO:0008152	AT2G14170.1	ALDH6B2	aldehyde dehydrogenase 6B2
Eucgr.I02605	Eucgr.I02605.1	0.52	0.63	GO:0055114,GO:0016491,GO:0008152	AT2G14170.1	ALDH6B2	aldehyde dehydrogenase 6B2
Eucgr.I02605	Eucgr.I02605.3	0.52	0.63	GO:0055114,GO:0016491,GO:0008152	AT2G14170.1	ALDH6B2	aldehyde dehydrogenase 6B2
Eucgr.I02605	Eucgr.I02605.2	0.52	0.63	GO:0055114,GO:0016491,GO:0008152	AT2G14170.1	ALDH6B2	aldehyde dehydrogenase 6B2
Eucgr.I02606	Eucgr.I02606.1	0.013	0.046	GO:0055114,GO:0016491,GO:0008152	AT2G14170.1	ALDH6B2	aldehyde dehydrogenase 6B2
Eucgr.B00335	Eucgr.B00335.1	0.1	0.11	GO:0055114,GO:0016491,GO:0008152	AT1G74920.1	ALDH10A8	aldehyde dehydrogenase 10A8
Eucgr.B00336	Eucgr.B00336.1	-0.17	0.1	GO:0055114,GO:0016491,GO:0008152	AT1G74920.1	ALDH10A8	aldehyde dehydrogenase 10A8
Eucgr.L01177	Eucgr.L01177.1	-1.9	0.49	GO:0055114,GO:0016491,GO:0008152	AT1G74920.1	ALDH10A8	aldehyde dehydrogenase 10A8
Eucgr.L01365	Eucgr.L01365.1	-3.7	1.1	GO:0055114,GO:0016491,GO:0008152	AT1G74920.1	ALDH10A8	aldehyde dehydrogenase 10A8
Eucgr.B00327	Eucgr.B00327.1	1.4	0.89	GO:0055114,GO:0016491,GO:0008152	AT3G48170.1	ALDH10A9	aldehyde dehydrogenase 10A9
Eucgr.B00329	Eucgr.B00329.1	0	5.1	GO:0055114,GO:0016491,GO:0008152	AT3G48170.1	ALDH10A9	aldehyde dehydrogenase 10A9
Eucgr.C01646	Eucgr.C01646.1	0.73	0.012	GO:0055114,GO:0016491,GO:0008152	AT2G24270.4	ALDH11A3	aldehyde dehydrogenase 11A3
Eucgr.C01646	Eucgr.C01646.2	0.73	0.012	GO:0055114,GO:0016491,GO:0008152	AT2G24270.4	ALDH11A3	aldehyde dehydrogenase 11A3
Eucgr.C01947	Eucgr.C01947.1	0.19	0.38	GO:0055114,GO:0016491,GO:0008152	AT2G24270.4	ALDH11A3	aldehyde dehydrogenase 11A3
Eucgr.C01947	Eucgr.C01947.2	0.19	0.38	GO:0055114,GO:0016491,GO:0008152	AT2G24270.4	ALDH11A3	aldehyde dehydrogenase 11A3
Eucgr.C02594	Eucgr.C02594.1	-1	-0.61	GO:0055114,GO:0016491,GO:0008152	AT2G24270.4	ALDH11A3	aldehyde dehydrogenase 11A3
Eucgr.C02594	Eucgr.C02594.2	-1	-0.61	GO:0055114,GO:0016491,GO:0008152	AT2G24270.4	ALDH11A3	aldehyde dehydrogenase 11A3
Eucgr.B00436	Eucgr.B00436.3	-0.15	0.064	GO:0055114,GO:0016491,GO:0008152	AT5G62530.1	ALDH12A1,ATP5CDH,P5CDH	aldehyde dehydrogenase 12A1
Eucgr.B00436	Eucgr.B00436.1	-0.15	0.064	GO:0055114,GO:0016491,GO:0008152	AT5G62530.1	ALDH12A1,ATP5CDH,P5CDH	aldehyde dehydrogenase 12A1
Eucgr.B00436	Eucgr.B00436.2	-0.15	0.064	GO:0055114,GO:0016491,GO:0008152	AT5G62530.1	ALDH12A1,ATP5CDH,P5CDH	aldehyde dehydrogenase 12A1
Eucgr.H04040	Eucgr.H04040.1	-0.12	-0.057	GO:0055114,GO:0016491,GO:0008152	AT3G66658.2	ALDH22A1	aldehyde dehydrogenase 22A1
Eucgr.H04040	Eucgr.H04040.3	-0.12	-0.057	GO:0055114,GO:0016491,GO:0008152	AT3G66658.2	ALDH22A1	aldehyde dehydrogenase 22A1
Eucgr.H04040	Eucgr.H04040.2	-0.12	-0.057	GO:0055114,GO:0016491,GO:0008152	AT3G66658.2	ALDH22A1	aldehyde dehydrogenase 22A1
Eucgr.I01821	Eucgr.I01821.1	1.5	-6.2	GO:0055114,GO:0016491,GO:0008152	AT3G48000.1	ALDH2,ALDH2A,ALDH2B4	aldehyde dehydrogenase 2B4
Eucgr.B00357	Eucgr.B00357.2	0.45	0.099	GO:0055114,GO:0016491,GO:0008152	AT3G48000.1	ALDH2,ALDH2A,ALDH2B4	aldehyde dehydrogenase 2B4
Eucgr.B00357	Eucgr.B00357.1	0.45	0.099	GO:0055114,GO:0016491,GO:0008152	AT3G48000.1	ALDH2,ALDH2A,ALDH2B4	aldehyde dehydrogenase 2B4
Eucgr.I01824	Eucgr.I01824.1	0	4.1	GO:0055114,GO:0016491,GO:0008152	AT3G48000.1	ALDH2,ALDH2A,ALDH2B4	aldehyde dehydrogenase 2B4
Eucgr.K02858	Eucgr.K02858.1	-0.98	0.13	GO:0055114,GO:0016491,GO:0008152	AT3G48000.1	ALDH2,ALDH2A,ALDH2B4	aldehyde dehydrogenase 2B4
Eucgr.K02858	Eucgr.K02858.2	-0.98	0.13	GO:0055114,GO:0016491,GO:0008152	AT3G48000.1	ALDH2,ALDH2A,ALDH2B4	aldehyde dehydrogenase 2B4
Eucgr.B03349	Eucgr.B03349.1	-0.14	-0.13	GO:0055114,GO:0016491,GO:0008152	AT1G23800.1	ALDH2B,ALDH2B7	aldehyde dehydrogenase 2B7
Eucgr.B03349	Eucgr.B03349.2	-0.14	-0.13	GO:0055114,GO:0016491,GO:0008152	AT1G23800.1	ALDH2B,ALDH2B7	aldehyde dehydrogenase 2B7
Eucgr.C03854	Eucgr.C03854.1	-0.94	0.47	GO:0055114,GO:0016491,GO:0008152	AT3G24503.1	ALDH1A,ALDH2C4,REF1	aldehyde dehydrogenase 2C4
Eucgr.C03853	Eucgr.C03853.3	-1.7	-0.67	GO:0055114,GO:0016491,GO:0008152	AT3G24503.1	ALDH1A,ALDH2C4,REF1	aldehyde dehydrogenase 2C4
Eucgr.C03853	Eucgr.C03853.1	-1.7	-0.67	GO:0055114,GO:0016491,GO:0008152	AT3G24503.1	ALDH1A,ALDH2C4,REF1	aldehyde dehydrogenase 2C4
Eucgr.C03853	Eucgr.C03853.2	-1.7	-0.67	GO:0055114,GO:0016491,GO:0008152	AT3G24503.1	ALDH1A,ALDH2C4,REF1	aldehyde dehydrogenase 2C4
Eucgr.C03857	Eucgr.C03857.1	-1.7	-0.24	GO:0055114,GO:0016491,GO:0008152	AT3G24503.1	ALDH1A,ALDH2C4,REF1	aldehyde dehydrogenase 2C4
Eucgr.C03860	Eucgr.C03860.1	-1.7	-1.4	GO:0055114,GO:0016491,GO:0008152	AT3G24503.1	ALDH1A,ALDH2C4,REF1	aldehyde dehydrogenase 2C4
Eucgr.C03856	Eucgr.C03856.1	-2.2	-0.66	GO:0055114,GO:0016491,GO:0008152	AT3G24503.1	ALDH1A,ALDH2C4,REF1	aldehyde dehydrogenase 2C4
Eucgr.C03859	Eucgr.C03859.1	-2.9	0.29	GO:0055114,GO:0016491,GO:0008152	AT3G24503.1	ALDH1A,ALDH2C4,REF1	aldehyde dehydrogenase 2C4
Eucgr.C03858	Eucgr.C03858.1	-4.8	0.29	GO:0055114,GO:0016491,GO:0008152	AT3G24503.1	ALDH1A,ALDH2C4,REF1	aldehyde dehydrogenase 2C4
Eucgr.C03858	Eucgr.C03858.2	-4.8	0.29	GO:0055114,GO:0016491,GO:0008152	AT3G24503.1	ALDH1A,ALDH2C4,REF1	aldehyde dehydrogenase 2C4
Eucgr.B03680	Eucgr.B03680.1	7.3	0	GO:0055114,GO:0016491,GO:0008152	AT4G36250.1	ALDH3F1	aldehyde dehydrogenase 3F1
Eucgr.J00772	Eucgr.J00772.1	4.8	6.9	GO:0055114,GO:0016491,GO:0008152	AT4G36250.1	ALDH3F1	aldehyde dehydrogenase 3F1
Eucgr.J00776	Eucgr.J00776.1	0.3	-1	GO:0055114,GO:0016491,GO:0008152	AT4G36250.1	ALDH3F1	aldehyde dehydrogenase 3F1
Eucgr.I02377	Eucgr.I02377.2	0	0	GO:0055114,GO:0016491,GO:0008152	AT4G36250.1	ALDH3F1	aldehyde dehydrogenase 3F1
Eucgr.I02377	Eucgr.I02377.1	0	0	GO:0055114,GO:0016491,GO:0008152	AT4G36250.1	ALDH3F1	aldehyde dehydrogenase 3F1
Eucgr.J00773	Eucgr.J00773.1	-3.4	-0.073	GO:0055114,GO:0016491,GO:0008152	AT4G36250.1	ALDH3F1	aldehyde dehydrogenase 3F1
Eucgr.F03800	Eucgr.F03800.3	-0.88	-0.47	GO:0055114,GO:0016491,GO:0008152	AT1G44170.2	ALDH3H1,ALDH4	aldehyde dehydrogenase 3H1
Eucgr.F03800	Eucgr.F03800.2	-0.88	-0.47	GO:0055114,GO:0016491,GO:0008152	AT1G44170.1	ALDH3H1,ALDH4	aldehyde dehydrogenase 3H1
Eucgr.F03800	Eucgr.F03800.1	-0.88	-0.47	GO:0055114,GO:0016491,GO:0008152	AT1G44170.1	ALDH3H1,ALDH4	aldehyde dehydrogenase 3H1
Eucgr.H05081	Eucgr.H05081.2	0.3	0.35	GO:0055114,GO:0016491,GO:0008152	AT4G34240.1	ALDH3,ALDH3I1	aldehyde dehydrogenase 3I1
Eucgr.H05081	Eucgr.H05081.4	0.3	0.35	GO:0055114,GO:0016491,GO:0008152	AT4G34240.1	ALDH3,ALDH3I1	aldehyde dehydrogenase 3I1
Eucgr.H05081	Eucgr.H05081.3	0.3	0.35	GO:0055114,GO:0016491,GO:0008152	AT4G34240.1	ALDH3,ALDH3I1	aldehyde dehydrogenase 3I1
Eucgr.H05081	Eucgr.H05081.1	0.3	0.35	GO:0055114,GO:0016491,GO:0008152	AT4G34240.1	ALDH3,ALDH3I1	aldehyde dehydrogenase 3I1
Eucgr.F04474	Eucgr.F04474.1	-0.19	-0.071	GO:0055114,GO:0016491,GO:0008152	AT1G79440.1	ALDH5F1,SSADH,SSADH1	aldehyde dehydrogenase 5F1
Eucgr.F04402	Eucgr.F04402.1	1.3	0.045	GO:0055114,GO:0016491,GO:0008152	AT1G54100.1	ALDH7B4	aldehyde dehydrogenase 7B4
Eucgr.D02030	Eucgr.D02030.1	0.43	0.056	GO:0005975	AT1G12230.1		Aldolase superfamily protein
Eucgr.B03752	Eucgr.B03752.1	0.33	-0.18	GO:0003824	AT2G26800.1		Aldolase superfamily protein
Eucgr.A02227	Eucgr.A02227.1	0.32	0.25	GO:0003824	AT2G26800.2		Aldolase superfamily protein
Eucgr.A02227	Eucgr.A02227.2	0.32	0.25	GO:0003824	AT2G26800.2		Aldolase superfamily protein
Eucgr.B03891	Eucgr.B03891.1	0.046	-1.2	GO:0006096,GO:0004332	AT2G36460.1		Aldolase superfamily protein
Eucgr.A01538	Eucgr.A01538.2	0.045	-0.28	GO:0006096,GO:0004332	AT3G52930.1		Aldolase superfamily protein
Eucgr.A01538	Eucgr.A01538.1	0.045	-0.28	GO:0006096,GO:0004332	AT3G52930.1		Aldolase superfamily protein
Eucgr.F02017	Eucgr.F02017.1	0.044	-0.71	GO:0006096,GO:0004332	AT4G26530.2		Aldolase superfamily protein
Eucgr.B02864	Eucgr.B02864.2	-0.053	-0.017	GO:0006096,GO:0004332	AT2G01140.1		Aldolase superfamily protein
Eucgr.B02864	Eucgr.B02864.1	-0.053	-0.017	GO:0006096,GO:0004332	AT2G01140.1		Aldolase superfamily protein
Eucgr.F03796	Eucgr.F03796.2	-0.079	-0.091	GO:0046872,GO:0033014,GO:0004655	AT1G69740.1	HEMB1	Aldolase superfamily protein
Eucgr.F03796	Eucgr.F03796.1	-0.079	-0.091	GO:0046872,GO:0033014,GO:0004655	AT1G69740.2	HEMB1	Aldolase superfamily protein
Eucgr.K02073	Eucgr.K02073.2	-0.38	-0.39	GO:0006096,GO:0004332	AT3G52930.1		Aldolase superfamily protein
Eucgr.K02073	Eucgr.K02073.1	-0.38	-0.39	GO:0006096,GO:0004332	AT2G36460.1		Aldolase superfamily protein
Eucgr.D00856	Eucgr.D00856.1	1.7	0.068	GO:0019295	AT4G21320.1	HSA32	Aldolase-type TIM barrel family protein
Eucgr.H00650	Eucgr.H00650.1	1	-0.22	GO:0005975	AT5G13420.1		Aldolase-type TIM barrel family protein
Eucgr.G00847	Eucgr.G00847.1	0.55	-0.11	GO:0016491,GO:0055114,GO:0018580	AT5G64250.2		Aldolase-type TIM barrel family protein
Eucgr.I01657	Eucgr.I01657.1	0.47	-0.067	GO:0016857,GO:0005975	AT3G01850.1		Aldolase-type TIM barrel family protein
Eucgr.K02981	Eucgr.K02981.1	0.32	0.056	GO:0042823,GO:0042819	AT5G01410.1	ATPDX1,ATPDX1.3,PDX1,PDX1.3,RSR4	Aldolase-type TIM barrel family protein
Eucgr.B02251	Eucgr.B02251.1	0.19	-0.33	GO:0042823,GO:0042819	AT5G01410.1	ATPDX1,ATPDX1.3,PDX1,PDX1.3,RSR4	Aldolase-type TIM barrel family protein
Eucgr.E02420	Eucgr.E02420.1	0.19	-0.97	GO:0016491	AT4G18360.1		Aldolase-type TIM barrel family protein
Eucgr.E02420	Eucgr.E02420.2	0.19	-0.97	GO:0016491	AT4G18360.1		Aldolase-type TIM barrel family protein
Eucgr.D00288	Eucgr.D00288.1	0.1	-0.039	GO:0016491	AT4G18360.1		Aldolase-type TIM barrel family protein
Eucgr.G01098	Eucgr.G01098.2	0.1	-0.034	GO:0006568,GO:0004834	AT4G02610.1		Aldolase-type TIM barrel family protein
Eucgr.G01098	Eucgr.G01098.3	0.1	-0.034	GO:0006568,GO:0004834	AT4G02610.1		Aldolase-type TIM barrel family protein
Eucgr.G01098	Eucgr.G01098.1	0.1	-0.034	GO:0006568,GO:0004834	AT4G02610.1		Aldolase-type TIM barrel family protein
Eucgr.H02404	Eucgr.H02404.2	0.073	-0.17	GO:0055114,GO:0050660,GO:0017150,GO:0008033	AT3G49640.1		Aldolase-type TIM barrel family protein
Eucgr.H02404	Eucgr.H02404.1	0.073	-0.17	GO:0055114,GO:0050660,GO:0017150,GO:0008033	AT3G49640.1		Aldolase-type TIM barrel family protein
Eucgr.I02089	Eucgr.I02089.1	0.0037	0.19	GO:0055114,GO:0003824,GO:0006164,GO:0003938	AT1G16350.1		Aldolase-type TIM barrel family protein
Eucgr.G01978	Eucgr.G01978.1	-0.034	-0.22	GO:0005975	AT5G13420.1		Aldolase-type TIM barrel family protein
Eucgr.F02471	Eucgr.F02471.2	-0.051	0.26	GO:0016491	AT3G14130.1		Aldolase-type TIM barrel family protein
Eucgr.F02471	Eucgr.F02471.1	-0.051	0.26	GO:0016491	AT3G14130.1		Aldolase-type TIM barrel family protein
Eucgr.F02471	Eucgr.F02471.3	-0.051	0.26	GO:0016491	AT3G14130.1		Aldolase-type TIM barrel family protein
Eucgr.F02471	Eucgr.F02471.4	-0.051	0.26	GO:0016491	AT3G14130.1		Aldolase-type TIM barrel family protein
Eucgr.A02663	Eucgr.A02663.3	-0.093	-0.33	GO:0000105	AT2G36230.1	APG10,HISN3	Aldolase-type TIM barrel family protein
Eucgr.A02663	Eucgr.A02663.2	-0.093	-0.33	GO:0000105	AT2G36230.1	APG10,HISN3	Aldolase-type TIM barrel family protein
Eucgr.A02663	Eucgr.A02663.1	-0.093	-0.33	GO:0000105	AT2G36230.1	APG10,HISN3	Aldolase-type TIM barrel family protein
Eucgr.A01368	Eucgr.A01368.1	-0.15	-0.027	GO:0004425	AT5G48220.1		Aldolase-type TIM barrel family protein
Eucgr.A01368	Eucgr.A01368.2	-0.15	-0.027	GO:0004425	AT5G48220.1		Aldolase-type TIM barrel family protein
Eucgr.F02472	Eucgr.F02472.1	-0.25	0.23	GO:0016491	AT3G14130.1		Aldolase-type TIM barrel family protein
Eucgr.F02472	Eucgr.F02472.2	-0.25	0.23	GO:0016491	AT3G14130.1		Aldolase-type TIM barrel family protein
Eucgr.E02909	Eucgr.E02909.1	-0.33	-0.23	GO:0055114,GO:0003824,GO:0006164,GO:0003938	AT1G16350.1		Aldolase-type TIM barrel family protein
Eucgr.K01360	Eucgr.K01360.1	-0.5	-0.34	GO:0009058,GO:0008676,GO:0008152,GO:0005737	AT1G79500.1	AtkdsA1	Aldolase-type TIM barrel family protein
Eucgr.F01413	Eucgr.F01413.2	-0.61	-0.71	GO:0016491	AT3G14420.5		Aldolase-type TIM barrel family protein
Eucgr.F01413	Eucgr.F01413.1	-0.61	-0.71	GO:0016491	AT3G14420.2		Aldolase-type TIM barrel family protein
Eucgr.F01413	Eucgr.F01413.3	-0.61	-0.71	GO:0016491	AT3G14420.1		Aldolase-type TIM barrel family protein
Eucgr.L02511	Eucgr.L02511.1	-1.2	-0.88	GO:0016491,GO:0055114,GO:0006164,GO:0003938	AT1G16350.1		Aldolase-type TIM barrel family protein
Eucgr.I01737	Eucgr.I01737.1	0.48	-0.034	GO:0016853,GO:0005975	AT5G14500.1		aldose 1-epimerase family protein
Eucgr.C00808	Eucgr.C00808.1	2.2	-3.4	GO:0008234,GO:0006508	AT5G60360.1	AALP,ALP,SAG2	aleurain-like protease
Eucgr.C00804	Eucgr.C00804.1	-0.24	0.12	GO:0008234,GO:0006508	AT5G60360.1	AALP,ALP,SAG2	aleurain-like protease
Eucgr.C00803	Eucgr.C00803.1	-0.3	-0.24	GO:0008234,GO:0006508	AT5G60360.1	AALP,ALP,SAG2	aleurain-like protease
Eucgr.C00805	Eucgr.C00805.1	-0.58	0.92	GO:0008234,GO:0006508	AT5G60360.1	AALP,ALP,SAG2	aleurain-like protease
Eucgr.C00809	Eucgr.C00809.1	-2	2.6	GO:0008234,GO:0006508	AT5G60360.1	AALP,ALP,SAG2	aleurain-like protease
Eucgr.G03065	Eucgr.G03065.1	0.34	0.036	GO:0005515,GO:0042393,GO:0006355	AT5G05610.1	AL1	alfin-like 1
Eucgr.J02833	Eucgr.J02833.1	-0.038	-0.21	GO:0005515,GO:0042393,GO:0006355	AT3G42790.1	AL3	alfin-like 3
Eucgr.C03146	Eucgr.C03146.1	-0.17	-0.22	GO:0005515,GO:0042393,GO:0006355	AT3G42790.1	AL3	alfin-like 3
Eucgr.C03569	Eucgr.C03569.1	0.25	-0.038	GO:0005515,GO:0042393,GO:0006355	AT5G20510.1	AL5	alfin-like 5
Eucgr.C03252	Eucgr.C03252.1	-0.23	-0.053	GO:0005515,GO:0042393,GO:0006355	AT5G20510.1	AL5	alfin-like 5
Eucgr.C00844	Eucgr.C00844.3	-0.29	0.085	GO:0005515,GO:0042393,GO:0006355	AT5G20510.1	AL5	alfin-like 5
Eucgr.C00844	Eucgr.C00844.2	-0.29	0.085	GO:0005515,GO:0042393,GO:0006355	AT5G20510.1	AL5	alfin-like 5
Eucgr.C00844	Eucgr.C00844.1	-0.29	0.085	GO:0005515,GO:0042393,GO:0006355	AT5G20510.1	AL5	alfin-like 5
Eucgr.G00055	Eucgr.G00055.1	0	4.1	GO:0042393,GO:0006355	AT2G02470.1	AL6	alfin-like 6
Eucgr.I02803	Eucgr.I02803.1	0.3	0.13	GO:0005515,GO:0042393,GO:0006355	AT1G14510.1	AL7	alfin-like 7
Eucgr.F02485	Eucgr.F02485.1	0.62	0.054	GO:0016758,GO:0005789	AT5G38460.2		ALG6, ALG8 glycosyltransferase family
Eucgr.F02485	Eucgr.F02485.2	0.62	0.054	GO:0016758,GO:0005789	AT5G38460.1		ALG6, ALG8 glycosyltransferase family
Eucgr.E01703	Eucgr.E01703.1	0.58	0.23	GO:0016758,GO:0005789	AT2G44660.1		ALG6, ALG8 glycosyltransferase family
Eucgr.F01228	Eucgr.F01228.1	-0.021	-0.019	GO:0016757	AT1G16900.1		Alg9-like mannosyltransferase family
Eucgr.C00228	Eucgr.C00228.1	-0.052	-0.021	GO:0016757	AT5G14850.1		Alg9-like mannosyltransferase family
Eucgr.C00652	Eucgr.C00652.1	0.32	0.23	GO:0016811,GO:0016021,GO:0006672	AT5G11870.2		Alkaline phytoceramidase (aPHC)
Eucgr.H00047	Eucgr.H00047.1	0.075	-0.087	GO:0016811,GO:0016021,GO:0006672	AT4G22330.1	ATCES1	Alkaline phytoceramidase (aPHC)
Eucgr.H00047	Eucgr.H00047.2	0.075	-0.087	GO:0016811,GO:0016021,GO:0006672	AT4G22330.1	ATCES1	Alkaline phytoceramidase (aPHC)
Eucgr.D01392	Eucgr.D01392.1	-0.43	-0.18	GO:0016811,GO:0016021,GO:0006672	AT4G22330.1	ATCES1	Alkaline phytoceramidase (aPHC)
Eucgr.J00457	Eucgr.J00457.3	0.41	0.12	GO:0033926	AT5G22510.1	At-A/N-InvE,INV-E	alkaline/neutral invertase
Eucgr.J00457	Eucgr.J00457.2	0.41	0.12	GO:0033926	AT5G22510.1	At-A/N-InvE,INV-E	alkaline/neutral invertase
Eucgr.J00457	Eucgr.J00457.1	0.41	0.12	GO:0033926	AT5G22510.1	At-A/N-InvE,INV-E	alkaline/neutral invertase
Eucgr.G02704	Eucgr.G02704.1	-0.15	-0.0017	GO:0033926	AT5G22510.1	At-A/N-InvE,INV-E	alkaline/neutral invertase
Eucgr.G02704	Eucgr.G02704.2	-0.15	-0.0017	GO:0033926	AT5G22510.1	At-A/N-InvE,INV-E	alkaline/neutral invertase
Eucgr.G02704	Eucgr.G02704.3	-0.15	-0.0017	GO:0033926	AT5G22510.1	At-A/N-InvE,INV-E	alkaline/neutral invertase
Eucgr.I00472	Eucgr.I00472.1	1.6	1.1		AT2G22530.1		Alkaline-phosphatase-like family protein
Eucgr.C03891	Eucgr.C03891.1	0.22	0.0051	GO:0003824	AT4G29680.1		Alkaline-phosphatase-like family protein
Eucgr.B01002	Eucgr.B01002.1	0.2	0.42	GO:0003824	AT5G17250.1		Alkaline-phosphatase-like family protein
Eucgr.B01002	Eucgr.B01002.2	0.2	0.42	GO:0003824	AT5G17250.1		Alkaline-phosphatase-like family protein
Eucgr.B01002	Eucgr.B01002.3	0.2	0.42	GO:0003824	AT5G17250.1		Alkaline-phosphatase-like family protein
Eucgr.I00548	Eucgr.I00548.1	0.11	0.18	GO:0003824	AT2G22530.1		Alkaline-phosphatase-like family protein
Eucgr.I00482	Eucgr.I00482.1	-0.24	1		AT2G22530.1		Alkaline-phosphatase-like family protein
Eucgr.I00552	Eucgr.I00552.2	-0.36	0.36	GO:0003824	AT2G22530.1		Alkaline-phosphatase-like family protein
Eucgr.I00552	Eucgr.I00552.1	-0.36	0.36	GO:0003824	AT2G22530.1		Alkaline-phosphatase-like family protein
Eucgr.I00480	Eucgr.I00480.1	-0.4	-0.61		AT2G22530.1		Alkaline-phosphatase-like family protein
Eucgr.D01328	Eucgr.D01328.1	0.78	-0.065	GO:0055114,GO:0016491,GO:0008270	AT5G16970.1	AER,AT-AER	alkenal reductase
Eucgr.G01686	Eucgr.G01686.1	0.66	-0.3	GO:0055114,GO:0016491,GO:0008270	AT5G16970.1	AER,AT-AER	alkenal reductase
Eucgr.C01170	Eucgr.C01170.1	0	0	GO:0055114,GO:0016491,GO:0008270	AT5G16970.1	AER,AT-AER	alkenal reductase
Eucgr.K00793	Eucgr.K00793.2	-0.033	0.8	GO:0055114,GO:0016491,GO:0008270	AT5G16970.1	AER,AT-AER	alkenal reductase
Eucgr.K00793	Eucgr.K00793.1	-0.033	0.8	GO:0055114,GO:0016491,GO:0008270	AT5G16970.1	AER,AT-AER	alkenal reductase
Eucgr.H00257	Eucgr.H00257.1	-2.2	-0.51	GO:0055114,GO:0016491,GO:0008270	AT5G16970.1	AER,AT-AER	alkenal reductase
Eucgr.L00058	Eucgr.L00058.1	-3.9	0.04	GO:0055114,GO:0016491,GO:0008270	AT5G16970.1	AER,AT-AER	alkenal reductase
Eucgr.D00017	Eucgr.D00017.1	0.97	1	GO:0016787,GO:0008152	AT4G20070.1	AAH,ATAAH	allantoate amidohydrolase
Eucgr.D00017	Eucgr.D00017.2	0.97	1	GO:0016787,GO:0008152	AT4G20070.1	AAH,ATAAH	allantoate amidohydrolase
Eucgr.D00017	Eucgr.D00017.3	0.97	1	GO:0016787,GO:0008152	AT4G20070.1	AAH,ATAAH	allantoate amidohydrolase
Eucgr.E03319	Eucgr.E03319.1	-0.17	-0.0037	GO:0016787	AT4G04955.1	ALN,ATALN	allantoinase
Eucgr.E03117	Eucgr.E03117.1	-0.86	0.25		AT4G04955.1	ALN,ATALN	allantoinase
Eucgr.E03116	Eucgr.E03116.1	-1.1	-0.025	GO:0016787	AT4G04955.1	ALN,ATALN	allantoinase
Eucgr.E03116	Eucgr.E03116.2	-1.1	-0.025	GO:0016787	AT4G04955.1	ALN,ATALN	allantoinase
Eucgr.F02479	Eucgr.F02479.1	-0.14	0.11	GO:0016853,GO:0009507	AT1G13280.1	AOC4	allene oxide cyclase 4
Eucgr.K01755	Eucgr.K01755.1	2.5	-0.47	GO:0055114,GO:0020037,GO:0016705,GO:0005506	AT5G42650.1	AOS,CYP74A,DDE2	allene oxide synthase
Eucgr.G00504	Eucgr.G00504.1	2.3	-0.63	GO:0055114,GO:0020037,GO:0016705,GO:0005506	AT5G42650.1	AOS,CYP74A,DDE2	allene oxide synthase
Eucgr.G01535	Eucgr.G01535.1	1.8	0.44		AT5G42650.1	AOS,CYP74A,DDE2	allene oxide synthase
Eucgr.G01537	Eucgr.G01537.1	1.6	-4.4	GO:0055114,GO:0020037,GO:0016705,GO:0005506	AT5G42650.1	AOS,CYP74A,DDE2	allene oxide synthase
Eucgr.G00507	Eucgr.G00507.1	1.4	-0.75	GO:0055114,GO:0020037,GO:0016705,GO:0005506	AT5G42650.1	AOS,CYP74A,DDE2	allene oxide synthase
Eucgr.F01505	Eucgr.F01505.1	0.33	-0.11	GO:0055114,GO:0020037,GO:0016705,GO:0005506	AT5G42650.1	AOS,CYP74A,DDE2	allene oxide synthase
Eucgr.G00501	Eucgr.G00501.1	0.13	-0.018	GO:0055114,GO:0020037,GO:0016705,GO:0005506	AT5G42650.1	AOS,CYP74A,DDE2	allene oxide synthase
Eucgr.G00499	Eucgr.G00499.1	-0.12	0.047	GO:0055114,GO:0020037,GO:0016705,GO:0005506	AT5G42650.1	AOS,CYP74A,DDE2	allene oxide synthase
Eucgr.G00496	Eucgr.G00496.1	-1.4	0.19	GO:0055114,GO:0020037,GO:0016705,GO:0005506	AT5G42650.1	AOS,CYP74A,DDE2	allene oxide synthase
Eucgr.G00497	Eucgr.G00497.1	-2.6	1.1	GO:0055114,GO:0020037,GO:0016705,GO:0005506	AT5G42650.1	AOS,CYP74A,DDE2	allene oxide synthase
Eucgr.G00493	Eucgr.G00493.1	-4.3	-0.79	GO:0055114,GO:0020037,GO:0016705,GO:0005506	AT5G42650.1	AOS,CYP74A,DDE2	allene oxide synthase
Eucgr.G01541	Eucgr.G01541.1	-7	-1.1	GO:0055114,GO:0020037,GO:0016705,GO:0005506	AT5G42650.1	AOS,CYP74A,DDE2	allene oxide synthase
Eucgr.B04022	Eucgr.B04022.1	3.2	0.33		AT2G30370.1	CHAL,EPFL6	allergen-related
Eucgr.E03354	Eucgr.E03354.1	-0.11	-0.46		AT1G61050.1		alpha 1,4-glycosyltransferase family protein
Eucgr.K02989	Eucgr.K02989.1	-0.32	0.16		AT5G01250.1		alpha 1,4-glycosyltransferase family protein
Eucgr.A00510	Eucgr.A00510.1	-1.4	-0.1		AT2G38150.1		alpha 1,4-glycosyltransferase family protein
Eucgr.F03487	Eucgr.F03487.1	-0.0056	0.19	GO:0005975,GO:0004553,GO:0043169,GO:0003824	AT3G20440.2	BE1,EMB2729	Alpha amylase family protein
Eucgr.K02031	Eucgr.K02031.1	0.33	0.64		AT3G52720.1	ACA1,ATACA1,CAH1	alpha carbonic anhydrase 1
Eucgr.K01571	Eucgr.K01571.2	0.61	-0.59		AT4G20990.1	ACA4,ATACA4	alpha carbonic anhydrase 4
Eucgr.K01571	Eucgr.K01571.1	0.61	-0.59		AT4G20990.1	ACA4,ATACA4	alpha carbonic anhydrase 4
Eucgr.K01571	Eucgr.K01571.3	0.61	-0.59		AT4G20990.1	ACA4,ATACA4	alpha carbonic anhydrase 4
Eucgr.A01640	Eucgr.A01640.1	-1.6	-0.025		AT4G20990.1	ACA4,ATACA4	alpha carbonic anhydrase 4
Eucgr.K02021	Eucgr.K02021.1	-2.2	0.72		AT4G20990.1	ACA4,ATACA4	alpha carbonic anhydrase 4
Eucgr.A01630	Eucgr.A01630.1	1.9	1.4		AT1G08080.1	ACA7,ATACA7	alpha carbonic anhydrase 7
Eucgr.A01627	Eucgr.A01627.1	0.82	0.61		AT1G08080.1	ACA7,ATACA7	alpha carbonic anhydrase 7
Eucgr.A01632	Eucgr.A01632.1	-0.099	-0.49		AT1G08080.1	ACA7,ATACA7	alpha carbonic anhydrase 7
Eucgr.A01633	Eucgr.A01633.1	-0.26	-0.17		AT1G08080.1	ACA7,ATACA7	alpha carbonic anhydrase 7
Eucgr.A01626	Eucgr.A01626.1	-0.6	-1.3		AT1G08080.1	ACA7,ATACA7	alpha carbonic anhydrase 7
Eucgr.A01642	Eucgr.A01642.1	-0.98	0.032		AT1G08080.1	ACA7,ATACA7	alpha carbonic anhydrase 7
Eucgr.B02520	Eucgr.B02520.1	-1.2	0.77		AT1G08080.1	ACA7,ATACA7	alpha carbonic anhydrase 7
Eucgr.A01636	Eucgr.A01636.1	-1.5	0.17		AT1G08080.1	ACA7,ATACA7	alpha carbonic anhydrase 7
Eucgr.G03058	Eucgr.G03058.1	0.16	-0.43		AT2G40095.1		Alpha/beta hydrolase related protein
Eucgr.F02858	Eucgr.F02858.1	0	6.1	GO:0016042,GO:0006629	AT5G37710.1		alpha/beta-Hydrolases superfamily protein
Eucgr.K03597	Eucgr.K03597.1	7.9	0		AT4G02340.1		alpha/beta-Hydrolases superfamily protein
Eucgr.E02678	Eucgr.E02678.1	6.5	3.7	GO:0006629	AT4G18550.1		alpha/beta-Hydrolases superfamily protein
Eucgr.E02691	Eucgr.E02691.1	5.4	2.7	GO:0006629	AT4G18550.1		alpha/beta-Hydrolases superfamily protein
Eucgr.B01907	Eucgr.B01907.1	5.3	4.1		AT3G05600.1		alpha/beta-Hydrolases superfamily protein
Eucgr.G03074	Eucgr.G03074.1	5.3	0		AT5G38360.1		alpha/beta-Hydrolases superfamily protein
Eucgr.H03839	Eucgr.H03839.1	5.1	4.4	GO:0006629	AT5G18640.1		alpha/beta-Hydrolases superfamily protein
Eucgr.L02126	Eucgr.L02126.1	4	-4		AT1G73480.1		alpha/beta-Hydrolases superfamily protein
Eucgr.H02046	Eucgr.H02046.1	2.8	0.39	GO:0006629	AT5G42930.1		alpha/beta-Hydrolases superfamily protein
Eucgr.E02682	Eucgr.E02682.1	2.7	-3.7	GO:0006629	AT4G18550.1		alpha/beta-Hydrolases superfamily protein
Eucgr.F00329	Eucgr.F00329.1	2.6	0.79		AT1G78210.1		alpha/beta-Hydrolases superfamily protein
Eucgr.H01677	Eucgr.H01677.1	2.6	0.64	GO:0006629	AT5G42930.1		alpha/beta-Hydrolases superfamily protein
Eucgr.D00647	Eucgr.D00647.1	2.4	1		AT4G02340.1		alpha/beta-Hydrolases superfamily protein
Eucgr.A02537	Eucgr.A02537.1	2.2	3.3		AT5G06570.1		alpha/beta-Hydrolases superfamily protein
Eucgr.H01680	Eucgr.H01680.1	2.2	-4.2	GO:0006629	AT5G67050.1		alpha/beta-Hydrolases superfamily protein
Eucgr.H02044	Eucgr.H02044.1	2.2	0.56	GO:0006629	AT5G42930.1		alpha/beta-Hydrolases superfamily protein
Eucgr.F00248	Eucgr.F00248.1	2	1.2	GO:0016787,GO:0008152	AT1G47480.1		alpha/beta-Hydrolases superfamily protein
Eucgr.F00478	Eucgr.F00478.1	2	0.055		AT3G03990.1		alpha/beta-Hydrolases superfamily protein
Eucgr.H03829	Eucgr.H03829.1	1.9	0.97	GO:0006629	AT5G18640.1		alpha/beta-Hydrolases superfamily protein
Eucgr.K02288	Eucgr.K02288.1	1.9	0.61		AT1G73480.1		alpha/beta-Hydrolases superfamily protein
Eucgr.L01916	Eucgr.L01916.1	1.9	0.75	GO:0016787	AT3G23600.1		alpha/beta-Hydrolases superfamily protein
Eucgr.B03302	Eucgr.B03302.1	1.7	-0.095		AT1G10740.3		alpha/beta-Hydrolases superfamily protein
Eucgr.B03302	Eucgr.B03302.2	1.7	-0.095		AT1G10740.4		alpha/beta-Hydrolases superfamily protein
Eucgr.G03073	Eucgr.G03073.1	1.7	0.71		AT5G38360.1		alpha/beta-Hydrolases superfamily protein
Eucgr.B01143	Eucgr.B01143.1	1.6	0.81		AT5G19050.1		alpha/beta-Hydrolases superfamily protein
Eucgr.B03032	Eucgr.B03032.1	1.6	-0.81		AT1G68620.1		alpha/beta-Hydrolases superfamily protein
Eucgr.J03039	Eucgr.J03039.1	1.6	0.58		AT1G52700.1		alpha/beta-Hydrolases superfamily protein
Eucgr.J03039	Eucgr.J03039.2	1.6	0.58		AT1G52700.1		alpha/beta-Hydrolases superfamily protein
Eucgr.H01110	Eucgr.H01110.3	1.5	0.52		AT3G62860.1		alpha/beta-Hydrolases superfamily protein
Eucgr.H01110	Eucgr.H01110.2	1.5	0.52		AT3G62860.1		alpha/beta-Hydrolases superfamily protein
Eucgr.H01110	Eucgr.H01110.1	1.5	0.52		AT3G62860.1		alpha/beta-Hydrolases superfamily protein
Eucgr.C01075	Eucgr.C01075.1	1.3	0.4		AT3G24420.1		alpha/beta-Hydrolases superfamily protein
Eucgr.E01050	Eucgr.E01050.1	1.3	0.53		AT4G24140.1		alpha/beta-Hydrolases superfamily protein
Eucgr.D01540	Eucgr.D01540.1	1.2	0.18	GO:0098599	AT3G60340.1		alpha/beta-Hydrolases superfamily protein
Eucgr.G01677	Eucgr.G01677.1	1.2	-2.8		AT2G18360.1		alpha/beta-Hydrolases superfamily protein
Eucgr.K03496	Eucgr.K03496.1	1.2	-0.45		AT4G02340.1		alpha/beta-Hydrolases superfamily protein
Eucgr.B00703	Eucgr.B00703.1	1.1	0.25	GO:0006629	AT1G73920.1		alpha/beta-Hydrolases superfamily protein
Eucgr.E00877	Eucgr.E00877.1	1.1	0.9		AT4G10955.2		alpha/beta-Hydrolases superfamily protein
Eucgr.K02663	Eucgr.K02663.1	1.1	0.31	GO:0006629	AT1G73920.1		alpha/beta-Hydrolases superfamily protein
Eucgr.L03025	Eucgr.L03025.1	1.1	-0.44	GO:0016787	AT5G36210.1		alpha/beta-Hydrolases superfamily protein
Eucgr.K03422	Eucgr.K03422.1	1	0.24	GO:0016787,GO:0008152	AT3G63010.1	ATGID1B,GID1B	alpha/beta-Hydrolases superfamily protein
Eucgr.H01057	Eucgr.H01057.1	0.98	-0.27	GO:0006629	AT1G02660.1		alpha/beta-Hydrolases superfamily protein
Eucgr.G02767	Eucgr.G02767.3	0.93	0.049		AT2G39420.1		alpha/beta-Hydrolases superfamily protein
Eucgr.G02767	Eucgr.G02767.1	0.93	0.049		AT2G39420.1		alpha/beta-Hydrolases superfamily protein
Eucgr.G02767	Eucgr.G02767.2	0.93	0.049		AT2G39420.1		alpha/beta-Hydrolases superfamily protein
Eucgr.H02520	Eucgr.H02520.1	0.91	0.022		AT1G10740.3		alpha/beta-Hydrolases superfamily protein
Eucgr.H03843	Eucgr.H03843.1	0.91	1.1	GO:0006629	AT5G18640.1		alpha/beta-Hydrolases superfamily protein
Eucgr.B03798	Eucgr.B03798.1	0.88	-0.24		AT5G06570.1		alpha/beta-Hydrolases superfamily protein
Eucgr.H02043	Eucgr.H02043.1	0.87	0.99	GO:0006629	AT5G42930.1		alpha/beta-Hydrolases superfamily protein
Eucgr.F02855	Eucgr.F02855.1	0.85	0.68	GO:0016042,GO:0006629	AT5G37710.1		alpha/beta-Hydrolases superfamily protein
Eucgr.B03069	Eucgr.B03069.2	0.84	0.27	GO:0016787,GO:0008152	AT1G26120.1	ICME-LIKE1	alpha/beta-Hydrolases superfamily protein
Eucgr.B03069	Eucgr.B03069.1	0.84	0.27	GO:0016787,GO:0008152	AT1G26120.1	ICME-LIKE1	alpha/beta-Hydrolases superfamily protein
Eucgr.B03069	Eucgr.B03069.3	0.84	0.27	GO:0016787,GO:0008152	AT1G26120.1	ICME-LIKE1	alpha/beta-Hydrolases superfamily protein
Eucgr.C03170	Eucgr.C03170.1	0.84	0.16		AT4G33180.1		alpha/beta-Hydrolases superfamily protein
Eucgr.H03605	Eucgr.H03605.1	0.82	0.29		AT3G23570.1		alpha/beta-Hydrolases superfamily protein
Eucgr.A02538	Eucgr.A02538.1	0.81	-0.066		AT5G06570.1		alpha/beta-Hydrolases superfamily protein
Eucgr.H03958	Eucgr.H03958.1	0.81	0.44		AT4G02340.1		alpha/beta-Hydrolases superfamily protein
Eucgr.B01154	Eucgr.B01154.1	0.8	1.2		AT3G23600.1		alpha/beta-Hydrolases superfamily protein
Eucgr.F00025	Eucgr.F00025.1	0.79	1.3		AT5G36210.1		alpha/beta-Hydrolases superfamily protein
Eucgr.D02523	Eucgr.D02523.1	0.77	0.31		AT2G44970.1		alpha/beta-Hydrolases superfamily protein
Eucgr.D02523	Eucgr.D02523.2	0.77	0.31		AT2G44970.1		alpha/beta-Hydrolases superfamily protein
Eucgr.F02990	Eucgr.F02990.1	0.77	-0.064		AT1G35420.2		alpha/beta-Hydrolases superfamily protein
Eucgr.K00129	Eucgr.K00129.3	0.76	0.12		AT5G51180.2		alpha/beta-Hydrolases superfamily protein
Eucgr.K00129	Eucgr.K00129.1	0.76	0.12		AT5G51180.1		alpha/beta-Hydrolases superfamily protein
Eucgr.K00129	Eucgr.K00129.4	0.76	0.12		AT5G51180.1		alpha/beta-Hydrolases superfamily protein
Eucgr.K00129	Eucgr.K00129.2	0.76	0.12		AT5G51180.2		alpha/beta-Hydrolases superfamily protein
Eucgr.L03707	Eucgr.L03707.1	0.76	0.94	GO:0006629	AT5G18640.1		alpha/beta-Hydrolases superfamily protein
Eucgr.C03169	Eucgr.C03169.2	0.73	0.26		AT4G33180.1		alpha/beta-Hydrolases superfamily protein
Eucgr.C03169	Eucgr.C03169.1	0.73	0.26		AT4G33180.1		alpha/beta-Hydrolases superfamily protein
Eucgr.D00646	Eucgr.D00646.1	0.73	0.68		AT3G51000.1		alpha/beta-Hydrolases superfamily protein
Eucgr.K03402	Eucgr.K03402.1	0.72	0.035		AT3G23600.1		alpha/beta-Hydrolases superfamily protein
Eucgr.F01623	Eucgr.F01623.1	0.69	-0.015		AT4G24160.1		alpha/beta-Hydrolases superfamily protein
Eucgr.J00487	Eucgr.J00487.1	0.69	-0.014		AT3G44510.2		alpha/beta-Hydrolases superfamily protein
Eucgr.J02382	Eucgr.J02382.1	0.68	-0.58		AT3G51000.1		alpha/beta-Hydrolases superfamily protein
Eucgr.F02494	Eucgr.F02494.4	0.65	0.084		AT5G16120.1		alpha/beta-Hydrolases superfamily protein
Eucgr.F02494	Eucgr.F02494.3	0.65	0.084		AT5G16120.1		alpha/beta-Hydrolases superfamily protein
Eucgr.F02494	Eucgr.F02494.2	0.65	0.084		AT5G16120.1		alpha/beta-Hydrolases superfamily protein
Eucgr.F02494	Eucgr.F02494.1	0.65	0.084		AT5G16120.2		alpha/beta-Hydrolases superfamily protein
Eucgr.H03854	Eucgr.H03854.1	0.65	0.59	GO:0006629	AT5G18640.1		alpha/beta-Hydrolases superfamily protein
Eucgr.H03854	Eucgr.H03854.3	0.65	0.59	GO:0006629	AT5G18640.1		alpha/beta-Hydrolases superfamily protein
Eucgr.H03854	Eucgr.H03854.2	0.65	0.59	GO:0006629	AT5G18640.1		alpha/beta-Hydrolases superfamily protein
Eucgr.H04767	Eucgr.H04767.1	0.64	0.28		AT4G39955.1		alpha/beta-Hydrolases superfamily protein
Eucgr.I00506	Eucgr.I00506.2	0.57	0.49		AT4G39955.1		alpha/beta-Hydrolases superfamily protein
Eucgr.I00506	Eucgr.I00506.1	0.57	0.49		AT4G39955.1		alpha/beta-Hydrolases superfamily protein
Eucgr.B01156	Eucgr.B01156.4	0.55	-0.34	GO:0016787	AT3G23600.1		alpha/beta-Hydrolases superfamily protein
Eucgr.B01156	Eucgr.B01156.1	0.55	-0.34	GO:0016787	AT3G23600.1		alpha/beta-Hydrolases superfamily protein
Eucgr.B01156	Eucgr.B01156.3	0.55	-0.34	GO:0016787	AT3G23600.1		alpha/beta-Hydrolases superfamily protein
Eucgr.B01156	Eucgr.B01156.5	0.55	-0.34	GO:0016787	AT3G23600.1		alpha/beta-Hydrolases superfamily protein
Eucgr.B01156	Eucgr.B01156.7	0.55	-0.34	GO:0016787	AT3G23600.2		alpha/beta-Hydrolases superfamily protein
Eucgr.B01156	Eucgr.B01156.2	0.55	-0.34	GO:0016787	AT3G23600.1		alpha/beta-Hydrolases superfamily protein
Eucgr.B01156	Eucgr.B01156.6	0.55	-0.34	GO:0016787	AT3G23600.1		alpha/beta-Hydrolases superfamily protein
Eucgr.H01277	Eucgr.H01277.1	0.55	0.044		AT2G18360.1		alpha/beta-Hydrolases superfamily protein
Eucgr.H03719	Eucgr.H03719.2	0.55	0.7		AT5G18640.1		alpha/beta-Hydrolases superfamily protein
Eucgr.H03719	Eucgr.H03719.1	0.55	0.7		AT5G18640.1		alpha/beta-Hydrolases superfamily protein
Eucgr.C00607	Eucgr.C00607.2	0.54	-0.51		AT5G11650.1		alpha/beta-Hydrolases superfamily protein
Eucgr.C00607	Eucgr.C00607.1	0.54	-0.51		AT5G11650.1		alpha/beta-Hydrolases superfamily protein
Eucgr.F02367	Eucgr.F02367.1	0.54	0.25	GO:0016788,GO:0006886,GO:0006505	AT4G34310.1		alpha/beta-Hydrolases superfamily protein
Eucgr.H01611	Eucgr.H01611.1	0.54	0.23	GO:0016787,GO:0008152	AT3G63010.1	ATGID1B,GID1B	alpha/beta-Hydrolases superfamily protein
Eucgr.B01530	Eucgr.B01530.3	0.51	0.32	GO:0006629	AT2G42450.1		alpha/beta-Hydrolases superfamily protein
Eucgr.B01530	Eucgr.B01530.2	0.51	0.32	GO:0006629	AT2G42450.1		alpha/beta-Hydrolases superfamily protein
Eucgr.B01530	Eucgr.B01530.1	0.51	0.32	GO:0006629	AT2G42450.1		alpha/beta-Hydrolases superfamily protein
Eucgr.F02972	Eucgr.F02972.1	0.48	0.48		AT4G10030.1		alpha/beta-Hydrolases superfamily protein
Eucgr.F02972	Eucgr.F02972.2	0.48	0.48		AT4G10030.1		alpha/beta-Hydrolases superfamily protein
Eucgr.J01512	Eucgr.J01512.1	0.47	0.038		AT5G38220.3		alpha/beta-Hydrolases superfamily protein
Eucgr.F02857	Eucgr.F02857.1	0.44	0.2	GO:0016042,GO:0006629	AT5G37710.1		alpha/beta-Hydrolases superfamily protein
Eucgr.D00683	Eucgr.D00683.1	0.42	0.68		AT1G11090.1		alpha/beta-Hydrolases superfamily protein
Eucgr.K02561	Eucgr.K02561.1	0.42	0.52		AT3G52570.1		alpha/beta-Hydrolases superfamily protein
Eucgr.F02203	Eucgr.F02203.1	0.4	0.21		AT1G10040.1		alpha/beta-Hydrolases superfamily protein
Eucgr.I02027	Eucgr.I02027.1	0.4	0.37		AT1G13820.1		alpha/beta-Hydrolases superfamily protein
Eucgr.C02420	Eucgr.C02420.1	0.38	-0.064		AT4G25770.1		alpha/beta-Hydrolases superfamily protein
Eucgr.C02420	Eucgr.C02420.2	0.38	-0.064		AT4G25770.1		alpha/beta-Hydrolases superfamily protein
Eucgr.C00770	Eucgr.C00770.1	0.37	0.13		AT2G03140.2		alpha/beta-Hydrolases superfamily protein
Eucgr.F00028	Eucgr.F00028.1	0.37	1.3		AT5G36210.1		alpha/beta-Hydrolases superfamily protein
Eucgr.A01803	Eucgr.A01803.2	0.35	0.27		AT3G51000.1		alpha/beta-Hydrolases superfamily protein
Eucgr.A01803	Eucgr.A01803.1	0.35	0.27		AT4G02340.1		alpha/beta-Hydrolases superfamily protein
Eucgr.I01294	Eucgr.I01294.2	0.33	0.24		AT3G51000.1		alpha/beta-Hydrolases superfamily protein
Eucgr.I01294	Eucgr.I01294.3	0.33	0.24		AT3G51000.1		alpha/beta-Hydrolases superfamily protein
Eucgr.I01294	Eucgr.I01294.1	0.33	0.24		AT3G51000.1		alpha/beta-Hydrolases superfamily protein
Eucgr.C00659	Eucgr.C00659.1	0.32	0.099		AT5G11910.1		alpha/beta-Hydrolases superfamily protein
Eucgr.H03609	Eucgr.H03609.2	0.32	-0.44		AT3G23570.1		alpha/beta-Hydrolases superfamily protein
Eucgr.H03609	Eucgr.H03609.3	0.32	-0.44	GO:0016787	AT3G23570.1		alpha/beta-Hydrolases superfamily protein
Eucgr.H03609	Eucgr.H03609.1	0.32	-0.44		AT3G23570.1		alpha/beta-Hydrolases superfamily protein
Eucgr.L01655	Eucgr.L01655.1	0.32	0.092	GO:0006629	AT5G18640.1		alpha/beta-Hydrolases superfamily protein
Eucgr.L01655	Eucgr.L01655.2	0.32	0.092	GO:0006629	AT5G18640.1		alpha/beta-Hydrolases superfamily protein
Eucgr.F00219	Eucgr.F00219.1	0.31	0.59	GO:0006629	AT5G42930.1		alpha/beta-Hydrolases superfamily protein
Eucgr.G02694	Eucgr.G02694.2	0.31	0.5		AT2G36290.1		alpha/beta-Hydrolases superfamily protein
Eucgr.G02694	Eucgr.G02694.1	0.31	0.5		AT2G36290.1		alpha/beta-Hydrolases superfamily protein
Eucgr.F02854	Eucgr.F02854.1	0.28	0.26	GO:0016042,GO:0006629	AT5G37710.1		alpha/beta-Hydrolases superfamily protein
Eucgr.H03849	Eucgr.H03849.1	0.28	1.4	GO:0006629	AT5G18640.1		alpha/beta-Hydrolases superfamily protein
Eucgr.B03111	Eucgr.B03111.1	0.26	0.64		AT3G30380.2		alpha/beta-Hydrolases superfamily protein
Eucgr.G03170	Eucgr.G03170.4	0.26	-0.011		AT3G10840.1		alpha/beta-Hydrolases superfamily protein
Eucgr.G03170	Eucgr.G03170.3	0.26	-0.011		AT3G10840.1		alpha/beta-Hydrolases superfamily protein
Eucgr.G03170	Eucgr.G03170.2	0.26	-0.011		AT3G10840.1		alpha/beta-Hydrolases superfamily protein
Eucgr.G03170	Eucgr.G03170.1	0.26	-0.011		AT3G10840.1		alpha/beta-Hydrolases superfamily protein
Eucgr.G03170	Eucgr.G03170.5	0.26	-0.011		AT3G10840.1		alpha/beta-Hydrolases superfamily protein
Eucgr.G01491	Eucgr.G01491.1	0.25	-0.002		AT1G47480.1		alpha/beta-Hydrolases superfamily protein
Eucgr.G02588	Eucgr.G02588.1	0.24	-0.16		AT3G19970.1		alpha/beta-Hydrolases superfamily protein
Eucgr.H02271	Eucgr.H02271.1	0.24	-0.33		AT4G37470.1		alpha/beta-Hydrolases superfamily protein
Eucgr.K02770	Eucgr.K02770.1	0.24	0.16		AT4G24760.1		alpha/beta-Hydrolases superfamily protein
Eucgr.K02770	Eucgr.K02770.2	0.24	0.16		AT4G24760.1		alpha/beta-Hydrolases superfamily protein
Eucgr.D02658	Eucgr.D02658.1	0.23	-0.34		AT5G19050.1		alpha/beta-Hydrolases superfamily protein
Eucgr.H01675	Eucgr.H01675.1	0.23	-0.73	GO:0006629	AT5G42930.1		alpha/beta-Hydrolases superfamily protein
Eucgr.K03494	Eucgr.K03494.2	0.23	0.33		AT4G02340.1		alpha/beta-Hydrolases superfamily protein
Eucgr.K03494	Eucgr.K03494.1	0.23	0.33		AT4G02340.1		alpha/beta-Hydrolases superfamily protein
Eucgr.A01449	Eucgr.A01449.1	0.22	-0.15		AT5G53050.3		alpha/beta-Hydrolases superfamily protein
Eucgr.A01449	Eucgr.A01449.2	0.22	-0.15		AT5G53050.1		alpha/beta-Hydrolases superfamily protein
Eucgr.B01579	Eucgr.B01579.2	0.19	-0.14		AT4G02340.1		alpha/beta-Hydrolases superfamily protein
Eucgr.B01579	Eucgr.B01579.1	0.19	-0.14		AT4G02340.1		alpha/beta-Hydrolases superfamily protein
Eucgr.B01579	Eucgr.B01579.3	0.19	-0.14		AT4G02340.1		alpha/beta-Hydrolases superfamily protein
Eucgr.B01579	Eucgr.B01579.4	0.19	-0.14		AT4G02340.1		alpha/beta-Hydrolases superfamily protein
Eucgr.K03401	Eucgr.K03401.1	0.19	0.044	GO:0016787	AT3G23570.1		alpha/beta-Hydrolases superfamily protein
Eucgr.B01162	Eucgr.B01162.1	0.18	0.11		AT4G14290.1		alpha/beta-Hydrolases superfamily protein
Eucgr.B01162	Eucgr.B01162.2	0.18	0.11		AT4G14290.1		alpha/beta-Hydrolases superfamily protein
Eucgr.J03032	Eucgr.J03032.1	0.18	-0.0027		AT1G15490.1		alpha/beta-Hydrolases superfamily protein
Eucgr.K00394	Eucgr.K00394.1	0.18	0.053		AT5G53050.2		alpha/beta-Hydrolases superfamily protein
Eucgr.L02400	Eucgr.L02400.1	0.17	0.39		AT4G39955.1		alpha/beta-Hydrolases superfamily protein
Eucgr.C01073	Eucgr.C01073.1	0.16	-0.33		AT3G24420.1		alpha/beta-Hydrolases superfamily protein
Eucgr.A02773	Eucgr.A02773.1	0.15	0.016	GO:0016042,GO:0006629	AT3G49050.1		alpha/beta-Hydrolases superfamily protein
Eucgr.B01272	Eucgr.B01272.1	0.14	0.15	GO:0006629	AT5G18640.1		alpha/beta-Hydrolases superfamily protein
Eucgr.E00140	Eucgr.E00140.1	0.13	0.15	GO:0006629,GO:0016042	AT4G00500.2		alpha/beta-Hydrolases superfamily protein
Eucgr.B03607	Eucgr.B03607.1	0.12	0.17		AT5G19850.1		alpha/beta-Hydrolases superfamily protein
Eucgr.B03607	Eucgr.B03607.3	0.12	0.17		AT5G19850.1		alpha/beta-Hydrolases superfamily protein
Eucgr.B03607	Eucgr.B03607.2	0.12	0.17		AT5G19850.1		alpha/beta-Hydrolases superfamily protein
Eucgr.K01222	Eucgr.K01222.1	0.12	-0.17		AT5G50890.1		alpha/beta-Hydrolases superfamily protein
Eucgr.L00922	Eucgr.L00922.1	0.12	0.32		AT5G25770.3		alpha/beta-Hydrolases superfamily protein
Eucgr.D01991	Eucgr.D01991.1	0.11	0.063		AT4G12230.1		alpha/beta-Hydrolases superfamily protein
Eucgr.I02080	Eucgr.I02080.1	0.11	0.066		AT3G30380.2		alpha/beta-Hydrolases superfamily protein
Eucgr.H03613	Eucgr.H03613.1	0.09	0.33	GO:0016787	AT3G23600.1		alpha/beta-Hydrolases superfamily protein
Eucgr.E00394	Eucgr.E00394.1	0.084	0.047	GO:0098599	AT3G60340.2		alpha/beta-Hydrolases superfamily protein
Eucgr.E00394	Eucgr.E00394.2	0.084	0.047	GO:0098599	AT3G60340.1		alpha/beta-Hydrolases superfamily protein
Eucgr.B03866	Eucgr.B03866.2	0.08	0.2		AT5G22460.1		alpha/beta-Hydrolases superfamily protein
Eucgr.B03866	Eucgr.B03866.1	0.08	0.2		AT5G22460.2		alpha/beta-Hydrolases superfamily protein
Eucgr.A01923	Eucgr.A01923.1	0.065	0.35	GO:0006629	AT2G42690.1		alpha/beta-Hydrolases superfamily protein
Eucgr.F00244	Eucgr.F00244.1	0.062	-0.28		AT1G47480.1		alpha/beta-Hydrolases superfamily protein
Eucgr.F00026	Eucgr.F00026.10	0.056	0.12		AT5G36210.1		alpha/beta-Hydrolases superfamily protein
Eucgr.F00026	Eucgr.F00026.3	0.056	0.12		AT5G36210.1		alpha/beta-Hydrolases superfamily protein
Eucgr.F00026	Eucgr.F00026.7	0.056	0.12	GO:0008236,GO:0006508	AT5G36210.1		alpha/beta-Hydrolases superfamily protein
Eucgr.F00026	Eucgr.F00026.8	0.056	0.12	GO:0008236,GO:0006508	AT5G36210.1		alpha/beta-Hydrolases superfamily protein
Eucgr.F00026	Eucgr.F00026.4	0.056	0.12		AT5G36210.1		alpha/beta-Hydrolases superfamily protein
Eucgr.F00026	Eucgr.F00026.1	0.056	0.12		AT5G36210.1		alpha/beta-Hydrolases superfamily protein
Eucgr.F00026	Eucgr.F00026.2	0.056	0.12		AT5G36210.1		alpha/beta-Hydrolases superfamily protein
Eucgr.F00026	Eucgr.F00026.6	0.056	0.12	GO:0008236,GO:0006508	AT5G36210.1		alpha/beta-Hydrolases superfamily protein
Eucgr.F00026	Eucgr.F00026.5	0.056	0.12		AT5G36210.1		alpha/beta-Hydrolases superfamily protein
Eucgr.F00026	Eucgr.F00026.9	0.056	0.12	GO:0008236,GO:0006508	AT5G36210.1		alpha/beta-Hydrolases superfamily protein
Eucgr.G01488	Eucgr.G01488.1	0.045	1.2		AT1G47480.1		alpha/beta-Hydrolases superfamily protein
Eucgr.C00876	Eucgr.C00876.2	0.035	0.74		AT3G47590.1		alpha/beta-Hydrolases superfamily protein
Eucgr.C00876	Eucgr.C00876.1	0.035	0.74		AT3G47590.1		alpha/beta-Hydrolases superfamily protein
Eucgr.C00876	Eucgr.C00876.3	0.035	0.74		AT3G47590.1		alpha/beta-Hydrolases superfamily protein
Eucgr.C00876	Eucgr.C00876.6	0.035	0.74		AT3G47590.1		alpha/beta-Hydrolases superfamily protein
Eucgr.C00876	Eucgr.C00876.5	0.035	0.74		AT3G47590.1		alpha/beta-Hydrolases superfamily protein
Eucgr.C00876	Eucgr.C00876.4	0.035	0.74		AT3G47590.1		alpha/beta-Hydrolases superfamily protein
Eucgr.F02231	Eucgr.F02231.1	0.035	0.14		AT1G27480.1		alpha/beta-Hydrolases superfamily protein
Eucgr.I00501	Eucgr.I00501.1	0.03	-0.23		AT5G09430.1		alpha/beta-Hydrolases superfamily protein
Eucgr.B03647	Eucgr.B03647.1	0.024	-0.19		AT5G19630.1		alpha/beta-Hydrolases superfamily protein
Eucgr.C00843	Eucgr.C00843.1	0.006	0.095		AT5G20520.1	WAV2	alpha/beta-Hydrolases superfamily protein
Eucgr.F02631	Eucgr.F02631.1	0.0042	0.14		AT1G34340.1		alpha/beta-Hydrolases superfamily protein
Eucgr.D00522	Eucgr.D00522.1	0	0	GO:0006629	AT4G18550.1		alpha/beta-Hydrolases superfamily protein
Eucgr.E01547	Eucgr.E01547.1	0	0	GO:0006629	AT2G44810.1	DAD1	alpha/beta-Hydrolases superfamily protein
Eucgr.F00245	Eucgr.F00245.1	0	0		AT1G47480.1		alpha/beta-Hydrolases superfamily protein
Eucgr.E00372	Eucgr.E00372.1	10	5.1	GO:0006629	AT4G16820.1	PLA-I{beta]2	alpha/beta-Hydrolases superfamily protein
Eucgr.G01469	Eucgr.G01469.1	0	0		AT3G48690.1	ATCXE12,CXE12	alpha/beta-Hydrolases superfamily protein
Eucgr.G01670	Eucgr.G01670.1	0	4.1		AT4G36610.1		alpha/beta-Hydrolases superfamily protein
Eucgr.L00997	Eucgr.L00997.1	0	0		AT2G18360.1		alpha/beta-Hydrolases superfamily protein
Eucgr.L03370	Eucgr.L03370.1	0	0		AT4G36610.1		alpha/beta-Hydrolases superfamily protein
Eucgr.G01478	Eucgr.G01478.1	-0.014	0.65		AT3G48690.1	ATCXE12,CXE12	alpha/beta-Hydrolases superfamily protein
Eucgr.E00227	Eucgr.E00227.1	-0.029	0.24		AT1G32190.1		alpha/beta-Hydrolases superfamily protein
Eucgr.E00227	Eucgr.E00227.2	-0.029	0.24		AT1G32190.1		alpha/beta-Hydrolases superfamily protein
Eucgr.B00501	Eucgr.B00501.1	-0.034	0.2		AT1G74640.1		alpha/beta-Hydrolases superfamily protein
Eucgr.G01481	Eucgr.G01481.1	-0.034	1.1		AT2G03550.1		alpha/beta-Hydrolases superfamily protein
Eucgr.G01660	Eucgr.G01660.1	-0.035	-0.053		AT2G18360.1		alpha/beta-Hydrolases superfamily protein
Eucgr.K00785	Eucgr.K00785.1	-0.047	-0.087		AT2G32520.1		alpha/beta-Hydrolases superfamily protein
Eucgr.K00785	Eucgr.K00785.2	-0.047	-0.087	GO:0016787	AT2G32520.1		alpha/beta-Hydrolases superfamily protein
Eucgr.E01878	Eucgr.E01878.1	-0.055	0.14	GO:0008374,GO:0006629	AT4G19860.1		alpha/beta-Hydrolases superfamily protein
Eucgr.H01669	Eucgr.H01669.2	-0.079	0.5	GO:0006629	AT5G67050.1		alpha/beta-Hydrolases superfamily protein
Eucgr.H01669	Eucgr.H01669.1	-0.079	0.5	GO:0006629	AT5G67050.1		alpha/beta-Hydrolases superfamily protein
Eucgr.A02606	Eucgr.A02606.1	-0.093	0.067		AT3G11620.1		alpha/beta-Hydrolases superfamily protein
Eucgr.I00502	Eucgr.I00502.1	-0.098	0.038		AT4G39955.1		alpha/beta-Hydrolases superfamily protein
Eucgr.I00502	Eucgr.I00502.2	-0.098	0.038		AT4G39955.1		alpha/beta-Hydrolases superfamily protein
Eucgr.D01678	Eucgr.D01678.1	-0.11	0.16		AT4G24140.1		alpha/beta-Hydrolases superfamily protein
Eucgr.E00879	Eucgr.E00879.1	-0.11	3.4	GO:0006629	AT4G10955.1		alpha/beta-Hydrolases superfamily protein
Eucgr.J02811	Eucgr.J02811.1	-0.11	0.29		AT1G17430.1		alpha/beta-Hydrolases superfamily protein
Eucgr.H03786	Eucgr.H03786.1	-0.12	0.36		AT5G18640.1		alpha/beta-Hydrolases superfamily protein
Eucgr.F00027	Eucgr.F00027.2	-0.14	0.42	GO:0016787	AT5G36210.1		alpha/beta-Hydrolases superfamily protein
Eucgr.F00027	Eucgr.F00027.3	-0.14	0.42		AT5G36210.1		alpha/beta-Hydrolases superfamily protein
Eucgr.F00027	Eucgr.F00027.1	-0.14	0.42	GO:0016787	AT5G36210.1		alpha/beta-Hydrolases superfamily protein
Eucgr.I02170	Eucgr.I02170.1	-0.14	0.21	GO:0006629	AT3G14360.1		alpha/beta-Hydrolases superfamily protein
Eucgr.K03498	Eucgr.K03498.1	-0.15	-0.41		AT4G02340.1		alpha/beta-Hydrolases superfamily protein
Eucgr.C04133	Eucgr.C04133.1	-0.18	-0.27		AT3G24420.1		alpha/beta-Hydrolases superfamily protein
Eucgr.C00875	Eucgr.C00875.1	-0.19	0.068		AT3G47590.1		alpha/beta-Hydrolases superfamily protein
Eucgr.C00875	Eucgr.C00875.2	-0.19	0.068		AT3G47590.1		alpha/beta-Hydrolases superfamily protein
Eucgr.C00875	Eucgr.C00875.3	-0.19	0.068		AT3G47590.1		alpha/beta-Hydrolases superfamily protein
Eucgr.I01696	Eucgr.I01696.1	-0.22	0.1		AT3G27320.2		alpha/beta-Hydrolases superfamily protein
Eucgr.I01707	Eucgr.I01707.2	-0.23	-0.25		AT5G14390.1		alpha/beta-Hydrolases superfamily protein
Eucgr.I01707	Eucgr.I01707.1	-0.23	-0.25		AT5G14390.1		alpha/beta-Hydrolases superfamily protein
Eucgr.K02051	Eucgr.K02051.1	-0.24	-0.16		AT2G36290.1		alpha/beta-Hydrolases superfamily protein
Eucgr.K03499	Eucgr.K03499.1	-0.24	-6.8		AT4G02340.1		alpha/beta-Hydrolases superfamily protein
Eucgr.B03228	Eucgr.B03228.1	-0.25	0.038		AT3G27320.1		alpha/beta-Hydrolases superfamily protein
Eucgr.H02038	Eucgr.H02038.1	-0.25	0.26	GO:0006629	AT5G42930.1		alpha/beta-Hydrolases superfamily protein
Eucgr.I02423	Eucgr.I02423.1	-0.25	0.068		AT4G36530.2		alpha/beta-Hydrolases superfamily protein
Eucgr.C01256	Eucgr.C01256.1	-0.27	-0.44		AT1G54990.1	AXR4,RGR,RGR1	alpha/beta-Hydrolases superfamily protein
Eucgr.C01256	Eucgr.C01256.3	-0.27	-0.44		AT1G54990.1	AXR4,RGR,RGR1	alpha/beta-Hydrolases superfamily protein
Eucgr.C01256	Eucgr.C01256.2	-0.27	-0.44		AT1G54990.1	AXR4,RGR,RGR1	alpha/beta-Hydrolases superfamily protein
Eucgr.J00955	Eucgr.J00955.3	-0.27	-0.11		AT3G09690.1		alpha/beta-Hydrolases superfamily protein
Eucgr.J00955	Eucgr.J00955.2	-0.27	-0.11		AT3G09690.2		alpha/beta-Hydrolases superfamily protein
Eucgr.J00955	Eucgr.J00955.1	-0.27	-0.11		AT3G09690.1		alpha/beta-Hydrolases superfamily protein
Eucgr.J00955	Eucgr.J00955.4	-0.27	-0.11		AT3G09690.2		alpha/beta-Hydrolases superfamily protein
Eucgr.K02891	Eucgr.K02891.1	-0.27	0.27	GO:0006629	AT3G48080.1		alpha/beta-Hydrolases superfamily protein
Eucgr.L02857	Eucgr.L02857.2	-0.28	-0.037		AT1G13820.1		alpha/beta-Hydrolases superfamily protein
Eucgr.L02857	Eucgr.L02857.1	-0.28	-0.037		AT5G39220.1		alpha/beta-Hydrolases superfamily protein
Eucgr.K03398	Eucgr.K03398.1	-0.3	-5.5	GO:0016787	AT3G23600.1		alpha/beta-Hydrolases superfamily protein
Eucgr.B01152	Eucgr.B01152.1	-0.31	-0.86		AT3G23600.1		alpha/beta-Hydrolases superfamily protein
Eucgr.C00879	Eucgr.C00879.1	-0.31	0.056		AT3G47590.1		alpha/beta-Hydrolases superfamily protein
Eucgr.C00879	Eucgr.C00879.2	-0.31	0.056		AT3G47590.1		alpha/beta-Hydrolases superfamily protein
Eucgr.A01174	Eucgr.A01174.2	-0.33	0.11		AT5G02970.1		alpha/beta-Hydrolases superfamily protein
Eucgr.A01174	Eucgr.A01174.1	-0.33	0.11		AT5G02970.1		alpha/beta-Hydrolases superfamily protein
Eucgr.D02117	Eucgr.D02117.1	-0.33	0.22	GO:0006629	AT4G16820.1	PLA-I{beta]2	alpha/beta-Hydrolases superfamily protein
Eucgr.I02424	Eucgr.I02424.1	-0.34	0.043		AT2G18245.1		alpha/beta-Hydrolases superfamily protein
Eucgr.D02325	Eucgr.D02325.2	-0.38	-0.15		AT3G61540.1		alpha/beta-Hydrolases superfamily protein
Eucgr.D02325	Eucgr.D02325.1	-0.38	-0.15		AT3G61540.1		alpha/beta-Hydrolases superfamily protein
Eucgr.L02208	Eucgr.L02208.1	-0.38	0.0032		AT5G36210.1		alpha/beta-Hydrolases superfamily protein
Eucgr.D01080	Eucgr.D01080.1	-0.41	0.2	GO:0016788,GO:0006886,GO:0006505	AT5G17670.1		alpha/beta-Hydrolases superfamily protein
Eucgr.G02692	Eucgr.G02692.1	-0.41	0.12		AT2G36290.1		alpha/beta-Hydrolases superfamily protein
Eucgr.A01804	Eucgr.A01804.1	-0.42	-0.29		AT3G51000.1		alpha/beta-Hydrolases superfamily protein
Eucgr.A02623	Eucgr.A02623.1	-0.45	-2.2	GO:0008236,GO:0006508	AT2G24280.1		alpha/beta-Hydrolases superfamily protein
Eucgr.E04233	Eucgr.E04233.1	-0.45	0.12		AT4G17150.1		alpha/beta-Hydrolases superfamily protein
Eucgr.C01011	Eucgr.C01011.1	-0.46	-0.016		AT2G44970.1		alpha/beta-Hydrolases superfamily protein
Eucgr.C01011	Eucgr.C01011.2	-0.46	-0.016		AT2G44970.1		alpha/beta-Hydrolases superfamily protein
Eucgr.C01119	Eucgr.C01119.1	-0.47	-0.14		AT5G20060.2		alpha/beta-Hydrolases superfamily protein
Eucgr.C01119	Eucgr.C01119.4	-0.47	-0.14		AT5G20060.3		alpha/beta-Hydrolases superfamily protein
Eucgr.C01119	Eucgr.C01119.3	-0.47	-0.14		AT5G20060.3		alpha/beta-Hydrolases superfamily protein
Eucgr.C01119	Eucgr.C01119.5	-0.47	-0.14	GO:0016787	AT5G20060.3		alpha/beta-Hydrolases superfamily protein
Eucgr.C01119	Eucgr.C01119.2	-0.47	-0.14		AT5G20060.1		alpha/beta-Hydrolases superfamily protein
Eucgr.H03610	Eucgr.H03610.1	-0.48	-0.17		AT3G23600.1		alpha/beta-Hydrolases superfamily protein
Eucgr.A01502	Eucgr.A01502.1	-0.49	-0.28		AT2G36290.1		alpha/beta-Hydrolases superfamily protein
Eucgr.L01569	Eucgr.L01569.1	-0.49	0.33	GO:0016787	AT5G19630.1		alpha/beta-Hydrolases superfamily protein
Eucgr.E00874	Eucgr.E00874.2	-0.51	-0.31	GO:0006629	AT4G10955.2		alpha/beta-Hydrolases superfamily protein
Eucgr.E00874	Eucgr.E00874.1	-0.51	-0.31	GO:0006629	AT4G10955.1		alpha/beta-Hydrolases superfamily protein
Eucgr.H03611	Eucgr.H03611.1	-0.51	-0.14	GO:0016787	AT3G23600.1		alpha/beta-Hydrolases superfamily protein
Eucgr.G01495	Eucgr.G01495.1	-0.54	-0.24		AT1G19190.1		alpha/beta-Hydrolases superfamily protein
Eucgr.B03156	Eucgr.B03156.1	-0.55	-0.13		AT1G13820.1		alpha/beta-Hydrolases superfamily protein
Eucgr.B03156	Eucgr.B03156.3	-0.55	-0.13		AT1G13820.1		alpha/beta-Hydrolases superfamily protein
Eucgr.B03156	Eucgr.B03156.2	-0.55	-0.13		AT1G13820.1		alpha/beta-Hydrolases superfamily protein
Eucgr.D01239	Eucgr.D01239.1	-0.55	-0.28	GO:0098599	AT3G60340.2		alpha/beta-Hydrolases superfamily protein
Eucgr.D01239	Eucgr.D01239.2	-0.55	-0.28	GO:0098599	AT3G60340.2		alpha/beta-Hydrolases superfamily protein
Eucgr.J02634	Eucgr.J02634.1	-0.55	-0.27	GO:0016787,GO:0008152	AT1G47480.1		alpha/beta-Hydrolases superfamily protein
Eucgr.I01166	Eucgr.I01166.1	-0.56	-0.37		AT1G47480.1		alpha/beta-Hydrolases superfamily protein
Eucgr.L02651	Eucgr.L02651.1	-0.59	-1.2		AT3G47590.1		alpha/beta-Hydrolases superfamily protein
Eucgr.A00041	Eucgr.A00041.3	-0.6	-0.43		AT5G17780.1		alpha/beta-Hydrolases superfamily protein
Eucgr.A00041	Eucgr.A00041.1	-0.6	-0.43		AT5G17780.1		alpha/beta-Hydrolases superfamily protein
Eucgr.A00041	Eucgr.A00041.2	-0.6	-0.43		AT5G17780.1		alpha/beta-Hydrolases superfamily protein
Eucgr.B01151	Eucgr.B01151.1	-0.61	1.4		AT3G23600.1		alpha/beta-Hydrolases superfamily protein
Eucgr.E02710	Eucgr.E02710.1	-0.61	0.15	GO:0006629	AT4G18550.1		alpha/beta-Hydrolases superfamily protein
Eucgr.K03501	Eucgr.K03501.1	-0.61	-0.25		AT4G02340.1		alpha/beta-Hydrolases superfamily protein
Eucgr.D00644	Eucgr.D00644.1	-0.63	-0.39		AT4G02340.1		alpha/beta-Hydrolases superfamily protein
Eucgr.I00505	Eucgr.I00505.1	-0.64	-0.36		AT4G39955.1		alpha/beta-Hydrolases superfamily protein
Eucgr.H01678	Eucgr.H01678.1	-0.65	-2	GO:0006629	AT5G42930.1		alpha/beta-Hydrolases superfamily protein
Eucgr.B02030	Eucgr.B02030.3	-0.66	-0.25		AT3G05120.1	ATGID1A,GID1A	alpha/beta-Hydrolases superfamily protein
Eucgr.B02030	Eucgr.B02030.1	-0.66	-0.25		AT5G27320.1	ATGID1C,GID1C	alpha/beta-Hydrolases superfamily protein
Eucgr.B02030	Eucgr.B02030.2	-0.66	-0.25		AT5G27320.1	ATGID1C,GID1C	alpha/beta-Hydrolases superfamily protein
Eucgr.E03517	Eucgr.E03517.2	-0.67	-0.35		AT5G25770.1		alpha/beta-Hydrolases superfamily protein
Eucgr.E03517	Eucgr.E03517.1	-0.67	-0.35		AT5G25770.1		alpha/beta-Hydrolases superfamily protein
Eucgr.L03388	Eucgr.L03388.1	-0.67	-0.44		AT3G48090.1	ATEDS1,EDS1	alpha/beta-Hydrolases superfamily protein
Eucgr.L03388	Eucgr.L03388.2	-0.67	-0.44		AT3G48090.1	ATEDS1,EDS1	alpha/beta-Hydrolases superfamily protein
Eucgr.J01164	Eucgr.J01164.1	-0.69	-0.05		AT2G39420.1		alpha/beta-Hydrolases superfamily protein
Eucgr.K02886	Eucgr.K02886.1	-0.69	-0.28	GO:0006629	AT3G48090.1	ATEDS1,EDS1	alpha/beta-Hydrolases superfamily protein
Eucgr.K02886	Eucgr.K02886.2	-0.69	-0.28	GO:0006629	AT3G48090.1	ATEDS1,EDS1	alpha/beta-Hydrolases superfamily protein
Eucgr.C00381	Eucgr.C00381.2	-0.72	-0.09		AT4G31020.1		alpha/beta-Hydrolases superfamily protein
Eucgr.C00381	Eucgr.C00381.1	-0.72	-0.09		AT4G31020.1		alpha/beta-Hydrolases superfamily protein
Eucgr.I00509	Eucgr.I00509.1	-0.75	0.18		AT5G09430.1		alpha/beta-Hydrolases superfamily protein
Eucgr.L03477	Eucgr.L03477.1	-0.76	0.015		AT4G02340.1		alpha/beta-Hydrolases superfamily protein
Eucgr.D00648	Eucgr.D00648.1	-0.77	-0.35		AT4G02340.1		alpha/beta-Hydrolases superfamily protein
Eucgr.G03202	Eucgr.G03202.1	-0.8	0.25		AT1G68620.1		alpha/beta-Hydrolases superfamily protein
Eucgr.H03957	Eucgr.H03957.1	-0.8	-0.73		AT4G02340.1		alpha/beta-Hydrolases superfamily protein
Eucgr.A01802	Eucgr.A01802.1	-0.83	-0.1		AT3G51000.1		alpha/beta-Hydrolases superfamily protein
Eucgr.D00649	Eucgr.D00649.1	-0.83	-0.42		AT4G02340.1		alpha/beta-Hydrolases superfamily protein
Eucgr.D02432	Eucgr.D02432.1	-0.83	-0.53	GO:0016787,GO:0008152	AT2G45600.1		alpha/beta-Hydrolases superfamily protein
Eucgr.G02314	Eucgr.G02314.2	-0.84	-0.12		AT1G77420.1		alpha/beta-Hydrolases superfamily protein
Eucgr.G02314	Eucgr.G02314.1	-0.84	-0.12		AT1G77420.1		alpha/beta-Hydrolases superfamily protein
Eucgr.H03608	Eucgr.H03608.1	-0.86	-0.076		AT3G23600.1		alpha/beta-Hydrolases superfamily protein
Eucgr.K02563	Eucgr.K02563.1	-0.87	-1.9		AT3G52570.1		alpha/beta-Hydrolases superfamily protein
Eucgr.J02629	Eucgr.J02629.1	-0.89	-0.078		AT3G48690.1	ATCXE12,CXE12	alpha/beta-Hydrolases superfamily protein
Eucgr.G01472	Eucgr.G01472.1	-0.92	-0.59		AT2G03550.1		alpha/beta-Hydrolases superfamily protein
Eucgr.A02624	Eucgr.A02624.1	-0.97	-0.25	GO:0008236,GO:0006508	AT2G24280.1		alpha/beta-Hydrolases superfamily protein
Eucgr.A02624	Eucgr.A02624.2	-0.97	-0.25	GO:0008236,GO:0006508	AT2G24280.1		alpha/beta-Hydrolases superfamily protein
Eucgr.E00876	Eucgr.E00876.1	-0.98	1.4	GO:0006629	AT4G10955.2		alpha/beta-Hydrolases superfamily protein
Eucgr.H02045	Eucgr.H02045.1	-1	1.6	GO:0006629	AT5G42930.1		alpha/beta-Hydrolases superfamily protein
Eucgr.K02885	Eucgr.K02885.1	-1	-0.25	GO:0006629	AT3G48090.1	ATEDS1,EDS1	alpha/beta-Hydrolases superfamily protein
Eucgr.K02890	Eucgr.K02890.1	-1	-0.062	GO:0006629	AT3G48080.1		alpha/beta-Hydrolases superfamily protein
Eucgr.K03595	Eucgr.K03595.1	-1	-1.8		AT4G02340.1		alpha/beta-Hydrolases superfamily protein
Eucgr.A02014	Eucgr.A02014.1	-1.1	0.064	GO:0006629	AT5G50890.1		alpha/beta-Hydrolases superfamily protein
Eucgr.C00253	Eucgr.C00253.1	-1.1	0.32	GO:0006508,GO:0004185	AT4G30610.1	BRS1,SCPL24	alpha/beta-Hydrolases superfamily protein
Eucgr.D00253	Eucgr.D00253.1	-1.1	-0.36	GO:0006629	AT1G30370.1		alpha/beta-Hydrolases superfamily protein
Eucgr.D00645	Eucgr.D00645.2	-1.1	-0.14		AT4G02340.1		alpha/beta-Hydrolases superfamily protein
Eucgr.D00645	Eucgr.D00645.1	-1.1	-0.14		AT4G02340.1		alpha/beta-Hydrolases superfamily protein
Eucgr.D00645	Eucgr.D00645.3	-1.1	-0.14		AT4G02340.1		alpha/beta-Hydrolases superfamily protein
Eucgr.D01725	Eucgr.D01725.1	-1.1	0.14		AT5G41850.1		alpha/beta-Hydrolases superfamily protein
Eucgr.E01548	Eucgr.E01548.1	-1.1	-1.9	GO:0006629	AT2G44810.1	DAD1	alpha/beta-Hydrolases superfamily protein
Eucgr.F04110	Eucgr.F04110.1	-1.1	-0.016		AT5G38520.1		alpha/beta-Hydrolases superfamily protein
Eucgr.F04110	Eucgr.F04110.2	-1.1	-0.016		AT5G38520.1		alpha/beta-Hydrolases superfamily protein
Eucgr.G01665	Eucgr.G01665.1	-1.1	-1.9		AT2G18360.1		alpha/beta-Hydrolases superfamily protein
Eucgr.I00504	Eucgr.I00504.1	-1.1	0.21		AT4G39955.1		alpha/beta-Hydrolases superfamily protein
Eucgr.K03311	Eucgr.K03311.1	-1.1	-0.21	GO:0006629	AT1G06800.1	PLA-I{gamma}1	alpha/beta-Hydrolases superfamily protein
Eucgr.C00878	Eucgr.C00878.2	-1.2	-0.91		AT3G47590.1		alpha/beta-Hydrolases superfamily protein
Eucgr.C00878	Eucgr.C00878.1	-1.2	-0.91		AT3G47590.1		alpha/beta-Hydrolases superfamily protein
Eucgr.G01468	Eucgr.G01468.1	-1.2	-0.33		AT3G48690.1	ATCXE12,CXE12	alpha/beta-Hydrolases superfamily protein
Eucgr.J03079	Eucgr.J03079.3	-1.2	0.21		AT1G52510.1		alpha/beta-Hydrolases superfamily protein
Eucgr.J03079	Eucgr.J03079.2	-1.2	0.21		AT1G52510.1		alpha/beta-Hydrolases superfamily protein
Eucgr.J03079	Eucgr.J03079.1	-1.2	0.21		AT1G52510.1		alpha/beta-Hydrolases superfamily protein
Eucgr.K02363	Eucgr.K02363.2	-1.2	0.52		AT4G12830.1		alpha/beta-Hydrolases superfamily protein
Eucgr.K02363	Eucgr.K02363.3	-1.2	0.52		AT4G12830.1		alpha/beta-Hydrolases superfamily protein
Eucgr.K02363	Eucgr.K02363.1	-1.2	0.52		AT4G12830.1		alpha/beta-Hydrolases superfamily protein
Eucgr.E02689	Eucgr.E02689.1	-1.3	-5.4	GO:0006629	AT4G18550.1		alpha/beta-Hydrolases superfamily protein
Eucgr.F00250	Eucgr.F00250.1	-1.3	0.083		AT1G47480.1		alpha/beta-Hydrolases superfamily protein
Eucgr.J00755	Eucgr.J00755.1	-1.3	-0.12	GO:0006629	AT1G51440.1		alpha/beta-Hydrolases superfamily protein
Eucgr.J02632	Eucgr.J02632.1	-1.3	-0.75		AT1G47480.1		alpha/beta-Hydrolases superfamily protein
Eucgr.C00378	Eucgr.C00378.1	-1.4	-0.15	GO:0008236,GO:0006508	AT2G24280.1		alpha/beta-Hydrolases superfamily protein
Eucgr.H03607	Eucgr.H03607.1	-1.4	-0.47	GO:0016787	AT3G23600.1		alpha/beta-Hydrolases superfamily protein
Eucgr.H03825	Eucgr.H03825.1	-1.4	1.7	GO:0006629	AT5G18640.1		alpha/beta-Hydrolases superfamily protein
Eucgr.H04727	Eucgr.H04727.1	-1.4	0.14		AT5G65400.1		alpha/beta-Hydrolases superfamily protein
Eucgr.J02635	Eucgr.J02635.1	-1.4	1.6	GO:0016787,GO:0008152	AT1G47480.1		alpha/beta-Hydrolases superfamily protein
Eucgr.G01473	Eucgr.G01473.1	-1.5	-0.36		AT2G03550.1		alpha/beta-Hydrolases superfamily protein
Eucgr.H01667	Eucgr.H01667.1	-1.5	-0.4	GO:0006629	AT5G67050.1		alpha/beta-Hydrolases superfamily protein
Eucgr.K02888	Eucgr.K02888.1	-1.5	0.93		AT3G48080.1		alpha/beta-Hydrolases superfamily protein
Eucgr.G01474	Eucgr.G01474.1	-1.6	-0.15		AT3G48690.1	ATCXE12,CXE12	alpha/beta-Hydrolases superfamily protein
Eucgr.H03554	Eucgr.H03554.1	-1.6	-0.54		AT1G47480.1		alpha/beta-Hydrolases superfamily protein
Eucgr.H03614	Eucgr.H03614.1	-1.6	-2.5	GO:0016787	AT3G23600.1		alpha/beta-Hydrolases superfamily protein
Eucgr.C01074	Eucgr.C01074.1	-1.7	-0.68		AT3G24420.1		alpha/beta-Hydrolases superfamily protein
Eucgr.F00249	Eucgr.F00249.1	-1.7	-0.26		AT1G47480.1		alpha/beta-Hydrolases superfamily protein
Eucgr.G02828	Eucgr.G02828.1	-1.7	-0.21		AT5G19290.1		alpha/beta-Hydrolases superfamily protein
Eucgr.H03555	Eucgr.H03555.1	-1.7	-0.012		AT1G47480.1		alpha/beta-Hydrolases superfamily protein
Eucgr.H03606	Eucgr.H03606.2	-1.7	0.39		AT3G23600.1		alpha/beta-Hydrolases superfamily protein
Eucgr.H03606	Eucgr.H03606.1	-1.7	0.39	GO:0016787	AT3G23600.1		alpha/beta-Hydrolases superfamily protein
Eucgr.A01503	Eucgr.A01503.1	-1.8	-0.71		AT2G36290.1		alpha/beta-Hydrolases superfamily protein
Eucgr.F02254	Eucgr.F02254.1	-1.9	-0.33		AT3G03990.1		alpha/beta-Hydrolases superfamily protein
Eucgr.F02550	Eucgr.F02550.1	-1.9	0.76		AT1G52700.1		alpha/beta-Hydrolases superfamily protein
Eucgr.H00215	Eucgr.H00215.1	-1.9	-0.12	GO:0006629	AT2G30550.2		alpha/beta-Hydrolases superfamily protein
Eucgr.B01155	Eucgr.B01155.1	-2	-0.82		AT3G23600.1		alpha/beta-Hydrolases superfamily protein
Eucgr.C00372	Eucgr.C00372.1	-2	-2.8	GO:0006629	AT5G37710.1		alpha/beta-Hydrolases superfamily protein
Eucgr.F00251	Eucgr.F00251.1	-2	-0.47		AT1G47480.1		alpha/beta-Hydrolases superfamily protein
Eucgr.G01482	Eucgr.G01482.1	-2	1.4		AT2G03550.1		alpha/beta-Hydrolases superfamily protein
Eucgr.J00486	Eucgr.J00486.1	-2	-0.34		AT5G22460.2		alpha/beta-Hydrolases superfamily protein
Eucgr.I00507	Eucgr.I00507.1	-2.2	2.2		AT4G39955.1		alpha/beta-Hydrolases superfamily protein
Eucgr.K02887	Eucgr.K02887.1	-2.2	-0.67	GO:0006629	AT3G48090.1	ATEDS1,EDS1	alpha/beta-Hydrolases superfamily protein
Eucgr.D02365	Eucgr.D02365.1	-3	-0.64	GO:0006629	AT3G61680.1		alpha/beta-Hydrolases superfamily protein
Eucgr.G01661	Eucgr.G01661.1	-3	-3.8		AT4G36610.1		alpha/beta-Hydrolases superfamily protein
Eucgr.A02493	Eucgr.A02493.1	-3.2	0.14	GO:0006508,GO:0004185	AT4G30610.1	BRS1,SCPL24	alpha/beta-Hydrolases superfamily protein
Eucgr.B03856	Eucgr.B03856.1	-3.5	1.1		AT3G44510.2		alpha/beta-Hydrolases superfamily protein
Eucgr.G03332	Eucgr.G03332.1	-3.7	-4.5	GO:0006508,GO:0004185	AT4G30610.1	BRS1,SCPL24	alpha/beta-Hydrolases superfamily protein
Eucgr.C01454	Eucgr.C01454.1	-4.1	0.092		AT3G24420.1		alpha/beta-Hydrolases superfamily protein
Eucgr.A01500	Eucgr.A01500.1	-4.3	0.51		AT2G36290.1		alpha/beta-Hydrolases superfamily protein
Eucgr.H04730	Eucgr.H04730.1	-4.5	0.85		AT5G65400.1		alpha/beta-Hydrolases superfamily protein
Eucgr.H04730	Eucgr.H04730.4	-4.5	0.85		AT5G65400.1		alpha/beta-Hydrolases superfamily protein
Eucgr.H04730	Eucgr.H04730.3	-4.5	0.85		AT5G65400.1		alpha/beta-Hydrolases superfamily protein
Eucgr.H04730	Eucgr.H04730.2	-4.5	0.85		AT5G65400.1		alpha/beta-Hydrolases superfamily protein
Eucgr.H04730	Eucgr.H04730.6	-4.5	0.85		AT5G65400.1		alpha/beta-Hydrolases superfamily protein
Eucgr.B03859	Eucgr.B03859.1	-5.5	1.4		AT5G22460.2		alpha/beta-Hydrolases superfamily protein
Eucgr.H04728	Eucgr.H04728.1	-7.4	-8.2		AT5G65400.1		alpha/beta-Hydrolases superfamily protein
Eucgr.D00520	Eucgr.D00520.1	-7.5	-1.9	GO:0006629	AT4G18550.1		alpha/beta-Hydrolases superfamily protein
Eucgr.I00503	Eucgr.I00503.1	-8.1	-3.9		AT4G39955.1		alpha/beta-Hydrolases superfamily protein
Eucgr.H04989	Eucgr.H04989.1	0.61	0.29	GO:0008375,GO:0006486	AT4G38240.2	CGL,CGL1,GNTI	alpha-1,3-mannosyl-glycoprotein beta-1,2-N-acetylglucosaminyltransferase, putative
Eucgr.H04989	Eucgr.H04989.2	0.61	0.29	GO:0008375,GO:0006486	AT4G38240.1	CGL,CGL1,GNTI	alpha-1,3-mannosyl-glycoprotein beta-1,2-N-acetylglucosaminyltransferase, putative
Eucgr.H04989	Eucgr.H04989.4	0.61	0.29	GO:0008375,GO:0006486	AT4G38240.1	CGL,CGL1,GNTI	alpha-1,3-mannosyl-glycoprotein beta-1,2-N-acetylglucosaminyltransferase, putative
Eucgr.H04989	Eucgr.H04989.3	0.61	0.29	GO:0008375,GO:0006486	AT4G38240.2	CGL,CGL1,GNTI	alpha-1,3-mannosyl-glycoprotein beta-1,2-N-acetylglucosaminyltransferase, putative
Eucgr.H04987	Eucgr.H04987.1	0.5	0.5	GO:0008375,GO:0006486	AT4G38240.3	CGL,CGL1,GNTI	alpha-1,3-mannosyl-glycoprotein beta-1,2-N-acetylglucosaminyltransferase, putative
Eucgr.H04987	Eucgr.H04987.2	0.5	0.5	GO:0008375,GO:0006486	AT4G38240.3	CGL,CGL1,GNTI	alpha-1,3-mannosyl-glycoprotein beta-1,2-N-acetylglucosaminyltransferase, putative
Eucgr.L00584	Eucgr.L00584.1	-0.66	-0.046	GO:0008375,GO:0006486	AT4G38240.2	CGL,CGL1,GNTI	alpha-1,3-mannosyl-glycoprotein beta-1,2-N-acetylglucosaminyltransferase, putative
Eucgr.L00583	Eucgr.L00583.1	-1.3	-0.12	GO:0008375,GO:0006486	AT4G38240.3	CGL,CGL1,GNTI	alpha-1,3-mannosyl-glycoprotein beta-1,2-N-acetylglucosaminyltransferase, putative
Eucgr.B01380	Eucgr.B01380.1	0.098	-0.36	GO:0030244,GO:0016866	AT5G16510.1		Alpha-1,4-glucan-protein synthase family protein
Eucgr.F02347	Eucgr.F02347.2	0.67	0.35	GO:0043169,GO:0005975,GO:0003824,GO:0005509,GO:0004556	AT4G25000.1	AMY1,ATAMY1	alpha-amylase-like
Eucgr.F02347	Eucgr.F02347.1	0.67	0.35	GO:0043169,GO:0005975,GO:0003824,GO:0005509,GO:0004556	AT4G25000.1	AMY1,ATAMY1	alpha-amylase-like
Eucgr.F02347	Eucgr.F02347.3	0.67	0.35	GO:0043169,GO:0005975,GO:0003824	AT4G25000.1	AMY1,ATAMY1	alpha-amylase-like
Eucgr.F02347	Eucgr.F02347.4	0.67	0.35	GO:0043169,GO:0005975,GO:0003824	AT4G25000.1	AMY1,ATAMY1	alpha-amylase-like
Eucgr.F02349	Eucgr.F02349.1	0.58	0.12	GO:0043169,GO:0005975,GO:0003824,GO:0005509,GO:0004556	AT4G25000.1	AMY1,ATAMY1	alpha-amylase-like
Eucgr.F03529	Eucgr.F03529.1	0.98	0.29	GO:0043169,GO:0005975,GO:0003824,GO:0005509,GO:0004556	AT1G76130.1	AMY2,ATAMY2	alpha-amylase-like 2
Eucgr.G02543	Eucgr.G02543.1	1.2	0.11	GO:0043169,GO:0005975,GO:0003824,GO:0005509,GO:0004556	AT1G69830.1	AMY3,ATAMY3	alpha-amylase-like 3
Eucgr.G02543	Eucgr.G02543.2	1.2	0.11	GO:0043169,GO:0005975,GO:0003824,GO:0005509,GO:0004556	AT1G69830.1	AMY3,ATAMY3	alpha-amylase-like 3
Eucgr.A01949	Eucgr.A01949.2	-0.86	-1.5		AT1G06460.1	ACD31.2,ACD32.1	alpha-crystallin domain 32.1
Eucgr.A01949	Eucgr.A01949.4	-0.86	-1.5		AT1G06460.1	ACD31.2,ACD32.1	alpha-crystallin domain 32.1
Eucgr.A01949	Eucgr.A01949.1	-0.86	-1.5		AT1G06460.1	ACD31.2,ACD32.1	alpha-crystallin domain 32.1
Eucgr.A01949	Eucgr.A01949.3	-0.86	-1.5		AT1G06460.1	ACD31.2,ACD32.1	alpha-crystallin domain 32.1
Eucgr.J00326	Eucgr.J00326.1	0.65	0.17		AT5G08380.1	AGAL1,AtAGAL1	alpha-galactosidase 1
Eucgr.J00325	Eucgr.J00325.1	-2	-2.8		AT5G08380.1	AGAL1,AtAGAL1	alpha-galactosidase 1
Eucgr.H00669	Eucgr.H00669.6	0.62	-0.023		AT5G08370.1	AGAL2,AtAGAL2	alpha-galactosidase 2
Eucgr.H00669	Eucgr.H00669.1	0.62	-0.023		AT5G08370.1	AGAL2,AtAGAL2	alpha-galactosidase 2
Eucgr.H00669	Eucgr.H00669.5	0.62	-0.023		AT5G08370.1	AGAL2,AtAGAL2	alpha-galactosidase 2
Eucgr.H00669	Eucgr.H00669.2	0.62	-0.023		AT5G08370.1	AGAL2,AtAGAL2	alpha-galactosidase 2
Eucgr.H00669	Eucgr.H00669.3	0.62	-0.023		AT5G08370.1	AGAL2,AtAGAL2	alpha-galactosidase 2
Eucgr.H00669	Eucgr.H00669.4	0.62	-0.023		AT5G08370.1	AGAL2,AtAGAL2	alpha-galactosidase 2
Eucgr.G02615	Eucgr.G02615.1	0.17	0.45		AT5G08370.1	AGAL2,AtAGAL2	alpha-galactosidase 2
Eucgr.D00664	Eucgr.D00664.1	-0.28	0.22	GO:0005975,GO:0004557	AT5G08370.1	AGAL2,AtAGAL2	alpha-galactosidase 2
Eucgr.G02617	Eucgr.G02617.1	-3	1.9		AT5G08370.1	AGAL2,AtAGAL2	alpha-galactosidase 2
Eucgr.B02278	Eucgr.B02278.2	-1.3	-0.55	GO:0008184,GO:0005975	AT3G46970.1	ATPHS2,PHS2	alpha-glucan phosphorylase 2
Eucgr.B02278	Eucgr.B02278.1	-1.3	-0.55	GO:0008184,GO:0005975	AT3G46970.1	ATPHS2,PHS2	alpha-glucan phosphorylase 2
Eucgr.A00046	Eucgr.A00046.1	-0.2	0.38		AT1G16700.1		Alpha-helical ferredoxin
Eucgr.I00724	Eucgr.I00724.3	-0.25	-0.21		AT1G79010.1		Alpha-helical ferredoxin
Eucgr.I00724	Eucgr.I00724.1	-0.25	-0.21		AT1G79010.1		Alpha-helical ferredoxin
Eucgr.I00724	Eucgr.I00724.2	-0.25	-0.21		AT1G79010.1		Alpha-helical ferredoxin
Eucgr.J01412	Eucgr.J01412.1	0.35	0.13	GO:0019843,GO:0005622,GO:0003723	AT5G15750.1		Alpha-L RNA-binding motif/Ribosomal protein S4 family protein
Eucgr.K01691	Eucgr.K01691.1	0.047	0.43	GO:0030246,GO:0046556,GO:0046373	AT3G10740.1	ARAF,ARAF1,ASD1,ATASD1	alpha-L-arabinofuranosidase 1
Eucgr.A02178	Eucgr.A02178.2	-0.28	0.012	GO:0046556,GO:0046373	AT3G10740.1	ARAF,ARAF1,ASD1,ATASD1	alpha-L-arabinofuranosidase 1
Eucgr.A02178	Eucgr.A02178.1	-0.28	0.012	GO:0046556,GO:0046373	AT3G10740.1	ARAF,ARAF1,ASD1,ATASD1	alpha-L-arabinofuranosidase 1
Eucgr.J00379	Eucgr.J00379.1	-0.15	-0.33	GO:0005975,GO:0004560	AT2G28100.1	ATFUC1,FUC1	alpha-L-fucosidase 1
Eucgr.J00379	Eucgr.J00379.2	-0.15	-0.33	GO:0005975,GO:0004560	AT2G28100.1	ATFUC1,FUC1	alpha-L-fucosidase 1
Eucgr.J00367	Eucgr.J00367.1	-0.17	-0.17	GO:0005975,GO:0004560	AT2G28100.1	ATFUC1,FUC1	alpha-L-fucosidase 1
Eucgr.A02861	Eucgr.A02861.1	-1.4	-0.064	GO:0005975,GO:0004560	AT2G28100.1	ATFUC1,FUC1	alpha-L-fucosidase 1
Eucgr.A02862	Eucgr.A02862.1	-1.9	-2.2	GO:0005975,GO:0004560	AT2G28100.1	ATFUC1,FUC1	alpha-L-fucosidase 1
Eucgr.C00102	Eucgr.C00102.1	0.47	1.4	GO:0016020,GO:0005509,GO:0004571	AT1G51590.1	MANIB,MNS1	alpha-mannosidase 1
Eucgr.F04021	Eucgr.F04021.3	0.24	-0.072	GO:0016020,GO:0005509,GO:0004571	AT1G51590.1	MANIB,MNS1	alpha-mannosidase 1
Eucgr.F04021	Eucgr.F04021.2	0.24	-0.072	GO:0016020,GO:0005509,GO:0004571	AT1G51590.1	MANIB,MNS1	alpha-mannosidase 1
Eucgr.F04021	Eucgr.F04021.1	0.24	-0.072	GO:0016020,GO:0005509,GO:0004571	AT1G51590.1	MANIB,MNS1	alpha-mannosidase 1
Eucgr.D00298	Eucgr.D00298.3	-0.11	-0.18	GO:0016020,GO:0005509,GO:0004571	AT1G30000.1	MNS3	alpha-mannosidase 3
Eucgr.D00298	Eucgr.D00298.1	-0.11	-0.18	GO:0016020,GO:0005509,GO:0004571	AT1G30000.1	MNS3	alpha-mannosidase 3
Eucgr.D00298	Eucgr.D00298.2	-0.11	-0.18	GO:0016020,GO:0005509,GO:0004571	AT1G30000.1	MNS3	alpha-mannosidase 3
Eucgr.J01382	Eucgr.J01382.2	1.9	1.5		AT5G13690.1	CYL1,NAGLU	alpha-N-acetylglucosaminidase family / NAGLU family
Eucgr.J01382	Eucgr.J01382.1	1.9	1.5		AT5G13690.1	CYL1,NAGLU	alpha-N-acetylglucosaminidase family / NAGLU family
Eucgr.B00338	Eucgr.B00338.2	-0.067	0.23		AT5G13690.1	CYL1,NAGLU	alpha-N-acetylglucosaminidase family / NAGLU family
Eucgr.B00338	Eucgr.B00338.1	-0.067	0.23		AT5G13690.1	CYL1,NAGLU	alpha-N-acetylglucosaminidase family / NAGLU family
Eucgr.G03358	Eucgr.G03358.2	-0.4	0.15		AT5G13690.1	CYL1,NAGLU	alpha-N-acetylglucosaminidase family / NAGLU family
Eucgr.G03358	Eucgr.G03358.1	-0.4	0.15		AT5G13690.1	CYL1,NAGLU	alpha-N-acetylglucosaminidase family / NAGLU family
Eucgr.G03107	Eucgr.G03107.3	0.23	-0.17	GO:0006886	AT3G56190.1	ALPHA-SNAP2,ASNAP	alpha-soluble NSF attachment protein 2
Eucgr.G03107	Eucgr.G03107.1	0.23	-0.17	GO:0006886	AT3G56190.1	ALPHA-SNAP2,ASNAP	alpha-soluble NSF attachment protein 2
Eucgr.G03107	Eucgr.G03107.4	0.23	-0.17	GO:0006886	AT3G56190.1	ALPHA-SNAP2,ASNAP	alpha-soluble NSF attachment protein 2
Eucgr.G03107	Eucgr.G03107.2	0.23	-0.17	GO:0006886	AT3G56190.1	ALPHA-SNAP2,ASNAP	alpha-soluble NSF attachment protein 2
Eucgr.D01340	Eucgr.D01340.2	-23	-24	GO:0006886	AT3G56190.1	ALPHA-SNAP2,ASNAP	alpha-soluble NSF attachment protein 2
Eucgr.D01340	Eucgr.D01340.3	-23	-24	GO:0006886	AT3G56190.1	ALPHA-SNAP2,ASNAP	alpha-soluble NSF attachment protein 2
Eucgr.D01340	Eucgr.D01340.1	-23	-24	GO:0006886	AT3G56190.1	ALPHA-SNAP2,ASNAP	alpha-soluble NSF attachment protein 2
Eucgr.J03188	Eucgr.J03188.2	2.6	3.6	GO:0008233,GO:0006508	AT2G25940.1	ALPHA-VPE,ALPHAVPE	alpha-vacuolar processing enzyme
Eucgr.J03188	Eucgr.J03188.1	2.6	3.6	GO:0008233,GO:0006508	AT2G25940.1	ALPHA-VPE,ALPHAVPE	alpha-vacuolar processing enzyme
Eucgr.J03189	Eucgr.J03189.1	1.9	1	GO:0008233,GO:0006508	AT2G25940.1	ALPHA-VPE,ALPHAVPE	alpha-vacuolar processing enzyme
Eucgr.C03004	Eucgr.C03004.2	-0.51	-0.063	GO:0008233,GO:0006508	AT2G25940.1	ALPHA-VPE,ALPHAVPE	alpha-vacuolar processing enzyme
Eucgr.J03190	Eucgr.J03190.2	-1	0.49	GO:0008233,GO:0006508	AT2G25940.1	ALPHA-VPE,ALPHAVPE	alpha-vacuolar processing enzyme
Eucgr.J03190	Eucgr.J03190.1	-1	0.49	GO:0008233,GO:0006508	AT2G25940.1	ALPHA-VPE,ALPHAVPE	alpha-vacuolar processing enzyme
Eucgr.J03190	Eucgr.J03190.3	-1	0.49	GO:0008233,GO:0006508	AT2G25940.1	ALPHA-VPE,ALPHAVPE	alpha-vacuolar processing enzyme
Eucgr.G02327	Eucgr.G02327.1	0.39	-0.18	GO:0005975,GO:0004553	AT1G68560.1	ATXYL1,TRG1,XYL1	alpha-xylosidase 1
Eucgr.L01889	Eucgr.L01889.1	-0.5	0.16	GO:0005975,GO:0004553	AT1G68560.1	ATXYL1,TRG1,XYL1	alpha-xylosidase 1
Eucgr.E03419	Eucgr.E03419.1	2.7	0.21	GO:0055114,GO:0016491	AT2G29990.1	NDA2	alternative NAD(P)H dehydrogenase 2
Eucgr.E03416	Eucgr.E03416.1	1.7	0.63	GO:0055114,GO:0016491	AT2G29990.1	NDA2	alternative NAD(P)H dehydrogenase 2
Eucgr.J01889	Eucgr.J01889.2	0.38	0.054	GO:0055114,GO:0016491	AT2G29990.1	NDA2	alternative NAD(P)H dehydrogenase 2
Eucgr.J01889	Eucgr.J01889.3	0.38	0.054	GO:0055114,GO:0016491	AT2G29990.1	NDA2	alternative NAD(P)H dehydrogenase 2
Eucgr.J01889	Eucgr.J01889.1	0.38	0.054	GO:0055114,GO:0016491	AT2G29990.1	NDA2	alternative NAD(P)H dehydrogenase 2
Eucgr.E02260	Eucgr.E02260.1	-0.68	-2.2	GO:0055114,GO:0016491	AT2G29990.1	NDA2	alternative NAD(P)H dehydrogenase 2
Eucgr.E01213	Eucgr.E01213.2	-0.95	-0.65	GO:0055114,GO:0009916	AT3G22370.1	AOX1A,ATAOX1A	alternative oxidase 1A
Eucgr.E01213	Eucgr.E01213.1	-0.95	-0.65	GO:0055114,GO:0009916	AT3G22370.1	AOX1A,ATAOX1A	alternative oxidase 1A
[truncated: 37,421 more rows]
