# Supplementary material
Source: Frontiers journal article supplement (https://www.frontiersin.org/articles/433407)
Supplement: Table_5.XLSX [file Table_5.XLSX]

## Sheet: GO
GO.ID	Description	Condition	p.Val	FDR	Gene counts	Gene
GO:0050896	response to stimulus	Pre-symbiosis (24 hour)	8.36e-07	8.36e-07	267	AT1G03670,AT1G04120,AT1G07960,AT1G08320,AT1G08370,AT1G09700,AT1G10520,AT1G12220,AT1G12290,AT1G12420,AT1G12940,AT1G14790,AT1G15520,AT1G15950,AT1G16110,AT1G16120,AT1G16130,AT1G16160,AT1G16260,AT1G16350,AT1G17170,AT1G17615,AT1G18390,AT1G21270,AT1G22770,AT1G25390,AT1G27880,AT1G31170,AT1G31190,AT1G32583,AT1G33240,AT1G34000,AT1G42990,AT1G49480,AT1G50170,AT1G50420,AT1G52520,AT1G53210,AT1G53350,AT1G54710…
GO:0006952	defense response	Pre-symbiosis (24 hour)	3.9e-06	3.9e-06	74	AT1G08370,AT1G12220,AT1G12290,AT1G15520,AT1G17615,AT1G53350,AT1G59780,AT1G64550,AT1G79680,AT1G80460,AT2G02100,AT2G05940,AT2G14580,AT2G17520,AT2G22370,AT2G27040,AT2G34930,AT2G39210,AT2G41370,AT2G43710,AT3G14470,AT3G15010,AT3G17980,AT3G18165,AT3G20770,AT3G23240,AT3G25040,AT3G50930,AT3G51550,AT3G53810,AT3G59280,AT4G04920,AT4G05200,AT4G10490,AT4G11460,AT4G11530,AT4G13040,AT4G16950,AT4G17880,AT4G19040…
GO:0009605	response to external stimulus	Pre-symbiosis (24 hour)	1.3e-05	1.3e-05	86	AT1G08320,AT1G12220,AT1G14790,AT1G15520,AT1G17615,AT1G18390,AT1G27880,AT1G33240,AT1G52520,AT1G54710,AT1G64550,AT1G68320,AT1G79670,AT1G79680,AT1G80460,AT2G05940,AT2G14580,AT2G17520,AT2G22370,AT2G27040,AT2G34930,AT2G39210,AT2G41370,AT2G41430,AT2G43710,AT2G47260,AT3G05740,AT3G17980,AT3G18165,AT3G20770,AT3G24550,AT3G47340,AT3G50930,AT3G51870,AT3G53810,AT3G54420,AT3G54950,AT3G59280,AT3G59470,AT3G60160…
GO:0051707	response to other organism	Pre-symbiosis (24 hour)	2.72e-05	2.72e-05	70	AT1G08320,AT1G12220,AT1G14790,AT1G15520,AT1G17615,AT1G64550,AT1G79670,AT1G79680,AT1G80460,AT2G05940,AT2G14580,AT2G17520,AT2G22370,AT2G27040,AT2G34930,AT2G39210,AT2G41370,AT2G41430,AT2G43710,AT2G47260,AT3G17980,AT3G18165,AT3G20770,AT3G24550,AT3G50930,AT3G51550,AT3G51870,AT3G53810,AT3G54420,AT3G54950,AT3G59280,AT3G60160,AT4G04920,AT4G05200,AT4G10490,AT4G11460,AT4G11530,AT4G13040,AT4G16950,AT4G19040…
GO:0051704	multi-organism process	Pre-symbiosis (24 hour)	2.77e-05	2.77e-05	88	AT1G06230,AT1G08320,AT1G12220,AT1G14790,AT1G15520,AT1G17615,AT1G18750,AT1G32370,AT1G32750,AT1G64550,AT1G66170,AT1G77320,AT1G79670,AT1G79680,AT1G80460,AT2G05940,AT2G07020,AT2G14580,AT2G17520,AT2G22370,AT2G23380,AT2G27040,AT2G31500,AT2G34930,AT2G39210,AT2G41370,AT2G41430,AT2G43710,AT2G43900,AT2G47260,AT3G03340,AT3G07160,AT3G17980,AT3G18165,AT3G20770,AT3G21180,AT3G24550,AT3G48820,AT3G50930,AT3G51870…
GO:0043207	response to external biotic stimulus	Pre-symbiosis (24 hour)	3.12e-05	3.12e-05	70	AT1G08320,AT1G12220,AT1G14790,AT1G15520,AT1G17615,AT1G64550,AT1G79670,AT1G79680,AT1G80460,AT2G05940,AT2G14580,AT2G17520,AT2G22370,AT2G27040,AT2G34930,AT2G39210,AT2G41370,AT2G41430,AT2G43710,AT2G47260,AT3G17980,AT3G18165,AT3G20770,AT3G24550,AT3G50930,AT3G51550,AT3G51870,AT3G53810,AT3G54420,AT3G54950,AT3G59280,AT3G60160,AT4G04920,AT4G05200,AT4G10490,AT4G11460,AT4G11530,AT4G13040,AT4G16950,AT4G19040…
GO:0009607	response to biotic stimulus	Pre-symbiosis (24 hour)	3.26e-05	3.26e-05	70	AT1G08320,AT1G12220,AT1G14790,AT1G15520,AT1G17615,AT1G64550,AT1G79670,AT1G79680,AT1G80460,AT2G05940,AT2G14580,AT2G17520,AT2G22370,AT2G27040,AT2G34930,AT2G39210,AT2G41370,AT2G41430,AT2G43710,AT2G47260,AT3G17980,AT3G18165,AT3G20770,AT3G24550,AT3G50930,AT3G51550,AT3G51870,AT3G53810,AT3G54420,AT3G54950,AT3G59280,AT3G60160,AT4G04920,AT4G05200,AT4G10490,AT4G11460,AT4G11530,AT4G13040,AT4G16950,AT4G19040…
GO:0005623	cell	Pre-symbiosis (24 hour)	5.06e-05	5.06e-05	524	AT1G01490,AT1G01650,AT1G02020,AT1G02420,AT1G03110,AT1G03370,AT1G04120,AT1G05910,AT1G06530,AT1G06840,AT1G07960,AT1G08320,AT1G08370,AT1G08400,AT1G09070,AT1G09300,AT1G09700,AT1G11290,AT1G12220,AT1G12290,AT1G12800,AT1G12940,AT1G13160,AT1G13450,AT1G15080,AT1G15950,AT1G16110,AT1G16120,AT1G16130,AT1G16160,AT1G16260,AT1G16350,AT1G17110,AT1G18390,AT1G18640,AT1G20060,AT1G20830,AT1G21170,AT1G21460,AT1G21480…
GO:0044464	cell part	Pre-symbiosis (24 hour)	5.06e-05	5.06e-05	524	AT1G01490,AT1G01650,AT1G02020,AT1G02420,AT1G03110,AT1G03370,AT1G04120,AT1G05910,AT1G06530,AT1G06840,AT1G07960,AT1G08320,AT1G08370,AT1G08400,AT1G09070,AT1G09300,AT1G09700,AT1G11290,AT1G12220,AT1G12290,AT1G12800,AT1G12940,AT1G13160,AT1G13450,AT1G15080,AT1G15950,AT1G16110,AT1G16120,AT1G16130,AT1G16160,AT1G16260,AT1G16350,AT1G17110,AT1G18390,AT1G18640,AT1G20060,AT1G20830,AT1G21170,AT1G21460,AT1G21480…
GO:0009987	cellular process	Pre-symbiosis (24 hour)	6.51e-05	6.51e-05	268	AT1G02420,AT1G03110,AT1G04120,AT1G05910,AT1G06530,AT1G06920,AT1G07960,AT1G08320,AT1G08370,AT1G09290,AT1G10520,AT1G11060,AT1G11290,AT1G12220,AT1G12290,AT1G12800,AT1G12940,AT1G13450,AT1G14790,AT1G15950,AT1G16260,AT1G16350,AT1G17110,AT1G18390,AT1G18750,AT1G20060,AT1G20830,AT1G21320,AT1G21460,AT1G22770,AT1G27440,AT1G27980,AT1G29170,AT1G31170,AT1G31190,AT1G32340,AT1G33240,AT1G42440,AT1G42990,AT1G47710…
GO:0005623	cell	Physical Contact (24 hour)	0.000146	0.000146	448	AT1G01490,AT1G01580,AT1G01800,AT1G03220,AT1G03360,AT1G03790,AT1G03840,AT1G04200,AT1G04760,AT1G05910,AT1G06260,AT1G06470,AT1G06510,AT1G06890,AT1G07080,AT1G07705,AT1G07870,AT1G08030,AT1G08420,AT1G08480,AT1G08770,AT1G09070,AT1G10200,AT1G10270,AT1G10840,AT1G11530,AT1G12280,AT1G13560,AT1G16110,AT1G16130,AT1G17280,AT1G17950,AT1G18390,AT1G18890,AT1G20060,AT1G20696,AT1G21065,AT1G21460,AT1G21720,AT1G21770…
GO:0044464	cell part	Physical Contact (24 hour)	0.000146	0.000146	448	AT1G01490,AT1G01580,AT1G01800,AT1G03220,AT1G03360,AT1G03790,AT1G03840,AT1G04200,AT1G04760,AT1G05910,AT1G06260,AT1G06470,AT1G06510,AT1G06890,AT1G07080,AT1G07705,AT1G07870,AT1G08030,AT1G08420,AT1G08480,AT1G08770,AT1G09070,AT1G10200,AT1G10270,AT1G10840,AT1G11530,AT1G12280,AT1G13560,AT1G16110,AT1G16130,AT1G17280,AT1G17950,AT1G18390,AT1G18890,AT1G20060,AT1G20696,AT1G21065,AT1G21460,AT1G21720,AT1G21770…
GO:0009816	defense response to bacterium, incompatible interaction	Pre-symbiosis (24 hour)	0.000307	0.000307	8	AT1G12220,AT2G17520,AT2G27040,AT3G17980,AT4G21380,AT4G23100,AT5G13160,AT5G62570
GO:0098542	defense response to other organism	Pre-symbiosis (24 hour)	0.000467	0.000467	54	AT1G12220,AT1G15520,AT1G17615,AT1G64550,AT1G80460,AT2G05940,AT2G14580,AT2G17520,AT2G22370,AT2G27040,AT2G34930,AT2G39210,AT2G41370,AT2G43710,AT3G17980,AT3G18165,AT3G20770,AT3G51550,AT3G53810,AT3G59280,AT4G04920,AT4G05200,AT4G10490,AT4G11460,AT4G11530,AT4G13040,AT4G16950,AT4G19040,AT4G21380,AT4G23100,AT4G23160,AT4G23180,AT4G23220,AT4G24230,AT4G31180,AT4G33950,AT4G35580,AT4G37320,AT4G37330,AT4G37340…
GO:0009617	response to bacterium	Pre-symbiosis (24 hour)	0.000476	0.000476	40	AT1G08320,AT1G12220,AT1G17615,AT1G64550,AT1G79680,AT1G80460,AT2G05940,AT2G14580,AT2G17520,AT2G27040,AT2G41370,AT2G41430,AT2G43710,AT3G17980,AT3G18165,AT3G20770,AT3G50930,AT3G53810,AT3G54420,AT3G59280,AT4G05200,AT4G11460,AT4G11530,AT4G13040,AT4G21380,AT4G23100,AT4G23160,AT4G23180,AT4G23220,AT4G24230,AT4G33950,AT4G35580,AT5G13160,AT5G14930,AT5G20480,AT5G44070,AT5G44510,AT5G47010,AT5G62570,AT5G63840
GO:0006950	response to stress	Pre-symbiosis (24 hour)	0.00118	0.00118	150	AT1G04120,AT1G07960,AT1G08370,AT1G10520,AT1G12220,AT1G12290,AT1G15520,AT1G15950,AT1G17615,AT1G18390,AT1G22770,AT1G27880,AT1G31170,AT1G32583,AT1G33240,AT1G42990,AT1G49480,AT1G50170,AT1G53210,AT1G53350,AT1G54710,AT1G59780,AT1G59960,AT1G64550,AT1G67580,AT1G68320,AT1G72920,AT1G75230,AT1G75280,AT1G77320,AT1G79680,AT1G80460,AT2G02100,AT2G05940,AT2G14580,AT2G17520,AT2G17690,AT2G22370,AT2G26250,AT2G27040…
GO:0001101	response to acid chemical	Pre-symbiosis (24 hour)	0.00126	0.00126	80	AT1G04120,AT1G09700,AT1G12420,AT1G12940,AT1G14790,AT1G15520,AT1G18390,AT1G21270,AT1G27880,AT1G33240,AT1G50420,AT1G62810,AT1G68320,AT1G68360,AT1G79460,AT1G79680,AT1G80080,AT2G06010,AT2G14580,AT2G17520,AT2G22370,AT2G26040,AT2G26980,AT2G29100,AT2G29120,AT2G30470,AT2G31500,AT2G33540,AT2G37170,AT2G37770,AT2G38280,AT2G39550,AT2G41370,AT2G41430,AT2G43710,AT2G45200,AT2G45660,AT3G04070,AT3G05740,AT3G07360…
GO:0005575	cellular_component	Physical Contact (24 hour)	0.00169	0.00169	465	AT1G01490,AT1G01580,AT1G01800,AT1G03220,AT1G03360,AT1G03530,AT1G03670,AT1G03790,AT1G03840,AT1G04200,AT1G04760,AT1G05910,AT1G06260,AT1G06470,AT1G06510,AT1G06890,AT1G07080,AT1G07705,AT1G07870,AT1G08030,AT1G08420,AT1G08480,AT1G08770,AT1G09070,AT1G10200,AT1G10270,AT1G10840,AT1G11530,AT1G12280,AT1G13560,AT1G16020,AT1G16110,AT1G16130,AT1G17280,AT1G17950,AT1G18390,AT1G18890,AT1G20060,AT1G20696,AT1G21065…
GO:0006725	cellular aromatic compound metabolic process	Pre-symbiosis (24 hour)	0.00183	0.00183	119	AT1G02420,AT1G03110,AT1G05910,AT1G06920,AT1G08370,AT1G09290,AT1G10520,AT1G11290,AT1G12800,AT1G13450,AT1G14790,AT1G15950,AT1G16350,AT1G21320,AT1G22770,AT1G33240,AT1G42440,AT1G47720,AT1G48650,AT1G61820,AT1G63970,AT1G69070,AT1G72680,AT1G75500,AT1G75540,AT1G77170,AT1G79680,AT2G13600,AT2G17520,AT2G17690,AT2G22090,AT2G23380,AT2G27040,AT2G29210,AT2G33540,AT2G36240,AT2G38080,AT2G41720,AT2G45660,AT2G46580…
GO:0071704	organic substance metabolic process	Pre-symbiosis (24 hour)	0.00203	0.00203	213	AT1G02420,AT1G02850,AT1G03110,AT1G05910,AT1G06920,AT1G08370,AT1G09290,AT1G10520,AT1G11290,AT1G12740,AT1G12800,AT1G13450,AT1G14790,AT1G15950,AT1G16130,AT1G16260,AT1G16350,AT1G17110,AT1G21320,AT1G22770,AT1G27440,AT1G27980,AT1G31190,AT1G32340,AT1G33240,AT1G42440,AT1G47710,AT1G47720,AT1G48650,AT1G50170,AT1G50410,AT1G53920,AT1G61390,AT1G61550,AT1G61820,AT1G63970,AT1G67080,AT1G69040,AT1G69070,AT1G71696…
GO:0022857	transmembrane transporter activity	Pre-symbiosis (24 hour)	0.00209	0.00209	58	AT1G04120,AT1G12940,AT1G21460,AT1G22150,AT1G25530,AT1G31260,AT1G44750,AT1G47670,AT1G52190,AT1G53210,AT1G54730,AT1G55910,AT1G65730,AT1G73700,AT1G74240,AT1G75500,AT1G77380,AT2G29100,AT2G29120,AT2G29940,AT2G34360,AT2G37170,AT2G37280,AT2G37330,AT2G39130,AT2G41705,AT3G05030,AT3G10960,AT3G18830,AT3G24460,AT3G26570,AT3G30340,AT3G30390,AT3G44160,AT3G51870,AT3G54820,AT3G60160,AT3G63380,AT4G00430,AT4G03560…
GO:0050896	response to stimulus	Physical Contact (24 hour)	0.0024	0.0024	217	AT1G01580,AT1G03220,AT1G03670,AT1G07870,AT1G08030,AT1G10840,AT1G11530,AT1G12280,AT1G15330,AT1G16110,AT1G16130,AT1G17280,AT1G17615,AT1G17950,AT1G18390,AT1G18890,AT1G24030,AT1G25390,AT1G31930,AT1G32583,AT1G34000,AT1G43700,AT1G45000,AT1G48630,AT1G50030,AT1G50420,AT1G52540,AT1G52690,AT1G53210,AT1G56450,AT1G56600,AT1G59960,AT1G60420,AT1G60800,AT1G61620,AT1G66980,AT1G67280,AT1G69530,AT1G71520,AT1G77180…
GO:0034641	cellular nitrogen compound metabolic process	Pre-symbiosis (24 hour)	0.00263	0.00263	85	AT1G02420,AT1G06920,AT1G08370,AT1G09290,AT1G10520,AT1G11290,AT1G12800,AT1G13450,AT1G14790,AT1G16350,AT1G33240,AT1G42440,AT1G47720,AT1G48650,AT1G62810,AT1G63970,AT1G69040,AT1G69070,AT1G71696,AT1G74590,AT1G75500,AT1G75540,AT1G79680,AT2G03667,AT2G13600,AT2G22090,AT2G23380,AT2G29210,AT2G36240,AT2G41720,AT2G45660,AT2G46580,AT3G03340,AT3G04070,AT3G07650,AT3G12380,AT3G13300,AT3G13570,AT3G16260,AT3G16810…
GO:1901360	organic cyclic compound metabolic process	Pre-symbiosis (24 hour)	0.0029	0.0029	120	AT1G02420,AT1G03110,AT1G05910,AT1G06920,AT1G08370,AT1G09290,AT1G10520,AT1G11290,AT1G12740,AT1G12800,AT1G13450,AT1G14790,AT1G15950,AT1G16350,AT1G21320,AT1G22770,AT1G33240,AT1G42440,AT1G47720,AT1G48650,AT1G61820,AT1G63970,AT1G69070,AT1G72680,AT1G75500,AT1G75540,AT1G77170,AT1G79680,AT2G13600,AT2G17520,AT2G17690,AT2G22090,AT2G23380,AT2G27040,AT2G29210,AT2G33540,AT2G36240,AT2G38080,AT2G41720,AT2G45660…
GO:0008152	metabolic process	Pre-symbiosis (24 hour)	0.00308	0.00308	227	AT1G02420,AT1G02850,AT1G03110,AT1G05910,AT1G06920,AT1G08370,AT1G09290,AT1G10520,AT1G11290,AT1G12740,AT1G12800,AT1G13450,AT1G14790,AT1G15950,AT1G16130,AT1G16260,AT1G16350,AT1G17110,AT1G21320,AT1G22770,AT1G27440,AT1G27980,AT1G31190,AT1G32340,AT1G33240,AT1G33540,AT1G42440,AT1G47710,AT1G47720,AT1G48650,AT1G50170,AT1G50410,AT1G53920,AT1G61390,AT1G61550,AT1G61820,AT1G62810,AT1G63970,AT1G67080,AT1G69040…
GO:0005488	binding	Pre-symbiosis (24 hour)	0.0045	0.0045	112	AT1G02420,AT1G08370,AT1G09070,AT1G09290,AT1G10520,AT1G11290,AT1G12420,AT1G12710,AT1G12800,AT1G13450,AT1G18750,AT1G21460,AT1G23380,AT1G29170,AT1G33240,AT1G42440,AT1G47710,AT1G47720,AT1G48650,AT1G53210,AT1G61390,AT1G69040,AT1G75540,AT1G76010,AT1G76460,AT1G80350,AT2G03667,AT2G05940,AT2G13600,AT2G19130,AT2G22090,AT2G23380,AT2G29190,AT2G29210,AT2G32710,AT2G33560,AT2G36240,AT2G41160,AT2G41370,AT2G41720…
GO:0010029	regulation of seed germination	Physical Contact (24 hour)	0.00506	0.00506	12	AT1G03790,AT1G75220,AT2G20180,AT2G34900,AT2G36270,AT3G48990,AT3G63060,AT4G18550,AT4G38630,AT5G02310,AT5G35750,AT5G55630
GO:0005215	transporter activity	Pre-symbiosis (24 hour)	0.0051	0.0051	63	AT1G04120,AT1G12940,AT1G21460,AT1G22150,AT1G25530,AT1G26170,AT1G31260,AT1G44750,AT1G47670,AT1G52190,AT1G53210,AT1G54730,AT1G55910,AT1G64550,AT1G65730,AT1G73700,AT1G74240,AT1G75500,AT1G77380,AT2G29100,AT2G29120,AT2G29530,AT2G29940,AT2G34360,AT2G37170,AT2G37280,AT2G37330,AT2G39130,AT2G41705,AT3G05030,AT3G10960,AT3G18830,AT3G24460,AT3G26570,AT3G30340,AT3G30390,AT3G44160,AT3G51870,AT3G54820,AT3G60160…
GO:0042742	defense response to bacterium	Pre-symbiosis (24 hour)	0.00552	0.00552	19	AT1G12220,AT1G80460,AT2G05940,AT2G17520,AT2G27040,AT2G41370,AT3G17980,AT3G18165,AT3G20770,AT4G05200,AT4G11460,AT4G21380,AT4G23100,AT4G23180,AT4G24230,AT4G35580,AT5G13160,AT5G62570,AT5G63840
GO:0005575	cellular_component	Pre-symbiosis (24 hour)	0.00602	0.00602	563	AT1G01490,AT1G01650,AT1G02020,AT1G02420,AT1G03110,AT1G03370,AT1G04120,AT1G05910,AT1G06530,AT1G06840,AT1G07960,AT1G08320,AT1G08370,AT1G08400,AT1G09070,AT1G09300,AT1G09700,AT1G11290,AT1G12220,AT1G12290,AT1G12420,AT1G12800,AT1G12940,AT1G13160,AT1G13450,AT1G15080,AT1G15950,AT1G16110,AT1G16120,AT1G16130,AT1G16160,AT1G16260,AT1G16350,AT1G17110,AT1G18390,AT1G18640,AT1G20060,AT1G20830,AT1G21170,AT1G21460…
GO:0006807	nitrogen compound metabolic process	Pre-symbiosis (24 hour)	0.00748	0.00748	182	AT1G02420,AT1G03110,AT1G05910,AT1G06920,AT1G08370,AT1G09290,AT1G10520,AT1G11290,AT1G12800,AT1G13450,AT1G14790,AT1G16130,AT1G16260,AT1G16350,AT1G17110,AT1G21320,AT1G22770,AT1G27980,AT1G32340,AT1G33240,AT1G42440,AT1G47710,AT1G47720,AT1G48650,AT1G50170,AT1G50410,AT1G61390,AT1G61550,AT1G62810,AT1G63970,AT1G69040,AT1G69070,AT1G71696,AT1G72710,AT1G74590,AT1G75500,AT1G75540,AT1G77170,AT1G79680,AT2G03667…
GO:0046483	heterocycle metabolic process	Pre-symbiosis (24 hour)	0.00876	0.00876	116	AT1G02420,AT1G03110,AT1G05910,AT1G06920,AT1G08370,AT1G09290,AT1G10520,AT1G11290,AT1G12800,AT1G13450,AT1G14790,AT1G16350,AT1G21320,AT1G22770,AT1G33240,AT1G42440,AT1G47720,AT1G48650,AT1G63970,AT1G69070,AT1G75500,AT1G75540,AT1G77170,AT1G79680,AT2G13600,AT2G17520,AT2G17690,AT2G22090,AT2G23380,AT2G27040,AT2G29210,AT2G33540,AT2G36240,AT2G39740,AT2G41720,AT2G45660,AT2G46580,AT3G03340,AT3G05740,AT3G07650…
GO:0044237	cellular metabolic process	Pre-symbiosis (24 hour)	0.00877	0.00877	199	AT1G02420,AT1G03110,AT1G05910,AT1G06920,AT1G08370,AT1G09290,AT1G10520,AT1G11290,AT1G12800,AT1G13450,AT1G14790,AT1G15950,AT1G16260,AT1G16350,AT1G17110,AT1G21320,AT1G22770,AT1G27440,AT1G27980,AT1G31190,AT1G32340,AT1G33240,AT1G42440,AT1G47710,AT1G47720,AT1G48650,AT1G61390,AT1G61550,AT1G61820,AT1G62810,AT1G63970,AT1G67080,AT1G69040,AT1G69070,AT1G71696,AT1G72680,AT1G72710,AT1G74590,AT1G75500,AT1G75540…
GO:1900140	regulation of seedling development	Physical Contact (24 hour)	0.00884	0.00884	12	AT1G03790,AT1G75220,AT2G20180,AT2G34900,AT2G36270,AT3G48990,AT3G63060,AT4G18550,AT4G38630,AT5G02310,AT5G35750,AT5G55630
GO:0051716	cellular response to stimulus	Pre-symbiosis (24 hour)	0.0102	0.0102	125	AT1G03670,AT1G04120,AT1G07960,AT1G08320,AT1G09700,AT1G10520,AT1G12220,AT1G12290,AT1G12940,AT1G14790,AT1G16110,AT1G16120,AT1G16130,AT1G16160,AT1G16260,AT1G18390,AT1G21270,AT1G25390,AT1G27880,AT1G31170,AT1G31190,AT1G33240,AT1G42990,AT1G52520,AT1G53210,AT1G53350,AT1G59780,AT1G62810,AT1G63500,AT1G67580,AT1G68320,AT1G68360,AT1G69730,AT1G75230,AT1G75500,AT1G77320,AT1G79460,AT1G79670,AT1G79680,AT2G05940…
GO:1901700	response to oxygen-containing compound	Physical Contact (24 hour)	0.0109	0.0109	80	AT1G10840,AT1G17950,AT1G18390,AT1G18890,AT1G48630,AT1G50030,AT1G50420,AT1G52690,AT1G56600,AT1G69530,AT1G71520,AT1G77180,AT1G79680,AT1G80410,AT2G04450,AT2G13600,AT2G17520,AT2G20180,AT2G22370,AT2G24720,AT2G26150,AT2G26650,AT2G29420,AT2G33710,AT2G36270,AT2G37430,AT2G38940,AT2G39550,AT2G40140,AT2G40170,AT2G43710,AT2G45660,AT3G05500,AT3G05740,AT3G08550,AT3G11820,AT3G12490,AT3G14050,AT3G15730,AT3G16890…
GO:0016021	integral component of membrane	Pre-symbiosis (24 hour)	0.0118	0.0118	44	AT1G01650,AT1G06530,AT1G15080,AT1G15520,AT1G16260,AT1G21460,AT1G22150,AT1G65730,AT1G73190,AT1G74240,AT2G22530,AT2G29940,AT2G31440,AT2G37170,AT2G37280,AT2G37330,AT2G38280,AT2G38670,AT2G41705,AT3G21180,AT3G24350,AT3G26570,AT3G51870,AT3G54820,AT3G60440,AT3G63340,AT3G63380,AT4G00430,AT4G05590,AT4G13510,AT4G18910,AT4G23400,AT4G28390,AT4G34190,AT5G03080,AT5G13170,AT5G17770,AT5G23660,AT5G42480,AT5G43360…
GO:0044444	cytoplasmic part	Physical Contact (24 hour)	0.0126	0.0126	259	AT1G03220,AT1G03360,AT1G04200,AT1G04760,AT1G06260,AT1G06470,AT1G06510,AT1G06890,AT1G07080,AT1G07705,AT1G08030,AT1G08480,AT1G08770,AT1G09070,AT1G10270,AT1G10840,AT1G11530,AT1G13560,AT1G17280,AT1G21065,AT1G21460,AT1G21720,AT1G21770,AT1G22620,AT1G22850,AT1G26340,AT1G27170,AT1G28150,AT1G30960,AT1G32070,AT1G32400,AT1G32580,AT1G33330,AT1G34000,AT1G34360,AT1G36280,AT1G43700,AT1G45000,AT1G47640,AT1G48520…
GO:0005886	plasma membrane	Pre-symbiosis (24 hour)	0.0153	0.0153	148	AT1G06840,AT1G09070,AT1G10140,AT1G12220,AT1G12290,AT1G12940,AT1G15080,AT1G15520,AT1G16110,AT1G16120,AT1G16130,AT1G16160,AT1G16260,AT1G17120,AT1G18390,AT1G21460,AT1G22150,AT1G25390,AT1G25530,AT1G31260,AT1G34750,AT1G47670,AT1G49480,AT1G52310,AT1G53350,AT1G59780,AT1G60890,AT1G61000,AT1G61390,AT1G61550,AT1G63500,AT1G65730,AT1G68570,AT1G69730,AT1G72710,AT1G73190,AT1G75280,AT1G75500,AT1G77380,AT1G79670…
GO:0022892	substrate-specific transporter activity	Pre-symbiosis (24 hour)	0.0168	0.0168	49	AT1G12940,AT1G21460,AT1G22150,AT1G25530,AT1G26170,AT1G31260,AT1G44750,AT1G47670,AT1G52190,AT1G53210,AT1G54730,AT1G55910,AT1G77380,AT2G29100,AT2G29120,AT2G29530,AT2G37170,AT2G37330,AT2G39130,AT2G41705,AT3G05030,AT3G10960,AT3G18830,AT3G24460,AT3G26570,AT3G30390,AT3G51870,AT3G54820,AT3G63380,AT4G00430,AT4G03560,AT4G05590,AT4G13510,AT4G23400,AT4G28390,AT4G33520,AT4G34190,AT4G35290,AT4G37270,AT5G03570…
GO:0005515	protein binding	Pre-symbiosis (24 hour)	0.0189	0.0189	190	AT1G02970,AT1G05910,AT1G06530,AT1G08320,AT1G08370,AT1G09070,AT1G09700,AT1G10520,AT1G12220,AT1G13450,AT1G15520,AT1G17615,AT1G18750,AT1G20830,AT1G21460,AT1G22770,AT1G23380,AT1G26340,AT1G29170,AT1G30490,AT1G31260,AT1G32340,AT1G32750,AT1G47710,AT1G49480,AT1G50170,AT1G50410,AT1G51160,AT1G60430,AT1G61390,AT1G61550,AT1G66170,AT1G67580,AT1G68360,AT1G69040,AT1G75540,AT1G80080,AT1G80350,AT2G03667,AT2G04660…
GO:0015075	ion transmembrane transporter activity	Pre-symbiosis (24 hour)	0.0202	0.0202	32	AT1G12940,AT1G22150,AT1G25530,AT1G31260,AT1G53210,AT1G54730,AT1G55910,AT1G77380,AT2G29100,AT2G37330,AT2G39130,AT2G41705,AT3G05030,AT3G18830,AT3G24460,AT3G26570,AT3G30390,AT3G51870,AT3G63380,AT4G03560,AT4G05590,AT4G13510,AT4G28390,AT4G33520,AT4G35290,AT4G37270,AT5G03570,AT5G13750,AT5G40780,AT5G44070,AT5G46610,AT5G55630
GO:0042221	response to chemical	Pre-symbiosis (24 hour)	0.0215	0.0215	143	AT1G04120,AT1G08320,AT1G09700,AT1G12420,AT1G12940,AT1G14790,AT1G15520,AT1G16350,AT1G17170,AT1G18390,AT1G21270,AT1G22770,AT1G27880,AT1G31170,AT1G33240,AT1G42990,AT1G50420,AT1G62810,AT1G63500,AT1G64550,AT1G68320,AT1G68360,AT1G68560,AT1G69040,AT1G73700,AT1G74590,AT1G75280,AT1G75500,AT1G79460,AT1G79680,AT1G80080,AT1G80460,AT2G04160,AT2G06010,AT2G13600,AT2G14580,AT2G17520,AT2G22370,AT2G26040,AT2G26980…
GO:0010033	response to organic substance	Physical Contact (24 hour)	0.0218	0.0218	90	AT1G08030,AT1G10840,AT1G17280,AT1G17950,AT1G18390,AT1G18890,AT1G31930,AT1G45000,AT1G48630,AT1G50030,AT1G50420,AT1G56600,AT1G69530,AT1G71520,AT1G77180,AT1G78830,AT1G79680,AT2G04160,AT2G04450,AT2G13600,AT2G17520,AT2G19560,AT2G20180,AT2G22370,AT2G24720,AT2G26150,AT2G29420,AT2G33710,AT2G36270,AT2G37430,AT2G38940,AT2G39550,AT2G40140,AT2G40170,AT2G43710,AT2G45660,AT2G47260,AT3G08550,AT3G11820,AT3G14050…
GO:0022891	substrate-specific transmembrane transporter activity	Pre-symbiosis (24 hour)	0.0221	0.0221	45	AT1G12940,AT1G21460,AT1G22150,AT1G25530,AT1G31260,AT1G44750,AT1G47670,AT1G52190,AT1G53210,AT1G54730,AT1G55910,AT1G77380,AT2G29100,AT2G29120,AT2G37170,AT2G37330,AT2G39130,AT2G41705,AT3G05030,AT3G10960,AT3G18830,AT3G24460,AT3G26570,AT3G30390,AT3G51870,AT3G54820,AT3G63380,AT4G00430,AT4G03560,AT4G05590,AT4G13510,AT4G23400,AT4G28390,AT4G33520,AT4G34190,AT4G35290,AT4G37270,AT5G03570,AT5G13170,AT5G13750…
GO:0015020	glucuronosyltransferase activity	Physical Contact (24 hour)	0.0221	0.0221	2	AT1G22360,AT1G22400
GO:0005886	plasma membrane	Physical Contact (24 hour)	0.0233	0.0233	125	AT1G01580,AT1G03220,AT1G04760,AT1G07870,AT1G08420,AT1G09070,AT1G10200,AT1G12280,AT1G16110,AT1G16130,AT1G18390,AT1G18890,AT1G21460,AT1G24030,AT1G25270,AT1G25390,AT1G31260,AT1G31930,AT1G34300,AT1G45000,AT1G52540,AT1G53420,AT1G55850,AT1G60800,AT1G61390,AT1G69480,AT1G71900,AT1G73190,AT1G77210,AT1G78610,AT1G78830,AT1G79670,AT1G79680,AT2G01600,AT2G05940,AT2G13360,AT2G17220,AT2G19130,AT2G24720,AT2G25430…
GO:0005887	integral component of plasma membrane	Pre-symbiosis (24 hour)	0.0235	0.0235	20	AT1G15080,AT1G21460,AT1G22150,AT1G73190,AT2G31440,AT2G37170,AT2G37330,AT2G41705,AT3G21180,AT3G26570,AT3G54820,AT3G63380,AT4G00430,AT4G13510,AT4G18910,AT4G23400,AT5G13170,AT5G23660,AT5G43360,AT5G55630
GO:0003824	catalytic activity	Physical Contact (24 hour)	0.0237	0.0237	235	AT1G01580,AT1G02170,AT1G03220,AT1G05910,AT1G06260,AT1G07870,AT1G08030,AT1G10270,AT1G11530,AT1G12700,AT1G16110,AT1G16130,AT1G17280,AT1G18390,AT1G18890,AT1G20060,AT1G22360,AT1G22400,AT1G22620,AT1G23450,AT1G24030,AT1G25360,AT1G25390,AT1G31500,AT1G31930,AT1G32070,AT1G34300,AT1G45000,AT1G48175,AT1G48520,AT1G50030,AT1G51410,AT1G51690,AT1G52540,AT1G53025,AT1G53420,AT1G54570,AT1G54870,AT1G55810,AT1G55850…
GO:0055085	transmembrane transport	Pre-symbiosis (24 hour)	0.0241	0.0241	37	AT1G04120,AT1G15520,AT1G25530,AT1G31260,AT1G47670,AT1G54730,AT1G55910,AT1G65730,AT1G73190,AT1G73700,AT1G77380,AT2G29530,AT2G29940,AT2G31500,AT2G34360,AT2G37170,AT2G37280,AT2G39130,AT2G41705,AT3G05030,AT3G30390,AT3G54820,AT3G59280,AT3G60160,AT4G00430,AT4G05590,AT4G18910,AT4G22790,AT4G23400,AT4G33520,AT4G33950,AT4G34190,AT5G03570,AT5G20480,AT5G62000,AT5G62810,ATMG01360
GO:0045087	innate immune response	Pre-symbiosis (24 hour)	0.0256	0.0256	16	AT1G12220,AT2G17520,AT2G27040,AT2G41370,AT3G14470,AT3G17980,AT3G18165,AT3G25040,AT3G50930,AT4G04920,AT4G16950,AT4G21380,AT4G23100,AT4G37870,AT5G13160,AT5G62570
GO:0001101	response to acid chemical	Physical Contact (24 hour)	0.0262	0.0262	65	AT1G10840,AT1G17950,AT1G18390,AT1G18890,AT1G48630,AT1G50420,AT1G52690,AT1G56600,AT1G69530,AT1G77180,AT1G79680,AT1G80410,AT2G04450,AT2G06050,AT2G17520,AT2G20180,AT2G22370,AT2G24720,AT2G26650,AT2G29420,AT2G36270,AT2G38940,AT2G39550,AT2G40170,AT2G43710,AT2G45660,AT3G05500,AT3G05740,AT3G08550,AT3G11820,AT3G12490,AT3G14050,AT3G15730,AT3G16890,AT3G22060,AT3G23700,AT3G50930,AT3G51430,AT3G52450,AT3G60240…
GO:0016020	membrane	Physical Contact (24 hour)	0.0271	0.0271	204	AT1G01580,AT1G03220,AT1G03670,AT1G04760,AT1G07870,AT1G08420,AT1G08480,AT1G09070,AT1G10200,AT1G12280,AT1G16110,AT1G16130,AT1G18390,AT1G18890,AT1G21460,AT1G21720,AT1G23070,AT1G24020,AT1G24030,AT1G25270,AT1G25390,AT1G26340,AT1G29820,AT1G31260,AT1G31930,AT1G32400,AT1G34000,AT1G34300,AT1G44750,AT1G45000,AT1G47640,AT1G52540,AT1G53210,AT1G53420,AT1G55850,AT1G60800,AT1G61390,AT1G64940,AT1G69480,AT1G71900…
GO:0042221	response to chemical	Physical Contact (24 hour)	0.0295	0.0295	120	AT1G08030,AT1G10840,AT1G11530,AT1G15330,AT1G17280,AT1G17950,AT1G18390,AT1G18890,AT1G31930,AT1G45000,AT1G48630,AT1G50030,AT1G50420,AT1G52690,AT1G56450,AT1G56600,AT1G60420,AT1G69530,AT1G71520,AT1G77180,AT1G78830,AT1G79680,AT1G80410,AT2G01770,AT2G04160,AT2G04450,AT2G13600,AT2G17520,AT2G19560,AT2G20180,AT2G22370,AT2G23150,AT2G24720,AT2G26150,AT2G26560,AT2G26650,AT2G29420,AT2G29940,AT2G33710,AT2G36270…
GO:1901700	response to oxygen-containing compound	Pre-symbiosis (24 hour)	0.0298	0.0298	92	AT1G04120,AT1G09700,AT1G12420,AT1G12940,AT1G14790,AT1G15520,AT1G18390,AT1G21270,AT1G22770,AT1G27880,AT1G33240,AT1G42990,AT1G50420,AT1G62810,AT1G63500,AT1G68320,AT1G68360,AT1G79460,AT1G79680,AT1G80080,AT2G06010,AT2G13600,AT2G14580,AT2G17520,AT2G22370,AT2G26040,AT2G26980,AT2G29100,AT2G29120,AT2G30470,AT2G31500,AT2G33540,AT2G37170,AT2G37770,AT2G37860,AT2G38280,AT2G39550,AT2G41370,AT2G41430,AT2G43710…
GO:0050794	regulation of cellular process	Pre-symbiosis (24 hour)	0.0303	0.0303	103	AT1G04120,AT1G05910,AT1G06920,AT1G08320,AT1G11060,AT1G12290,AT1G13450,AT1G14790,AT1G16260,AT1G18390,AT1G18750,AT1G22770,AT1G29170,AT1G31190,AT1G32340,AT1G33240,AT1G42990,AT1G47710,AT1G47720,AT1G62810,AT1G67080,AT1G69040,AT1G72710,AT1G75500,AT1G75540,AT1G79460,AT1G79680,AT2G05940,AT2G13600,AT2G17520,AT2G22090,AT2G23460,AT2G26040,AT2G26980,AT2G27040,AT2G28940,AT2G29100,AT2G32710,AT2G33540,AT2G33560…
GO:0006304	DNA modification	Pre-symbiosis (24 hour)	0.0319	0.0319	11	AT1G05910,AT1G50410,AT1G75230,AT2G27040,AT3G17310,AT3G49250,AT4G31270,AT5G04290,AT5G04560,AT5G14620,AT5G58130
GO:0004674	protein serine/threonine kinase activity	Physical Contact (24 hour)	0.0342	0.0342	36	AT1G07870,AT1G16110,AT1G16130,AT1G18390,AT1G18890,AT1G24030,AT1G25390,AT1G34300,AT1G52540,AT1G53420,AT1G60800,AT1G61390,AT1G79670,AT1G79680,AT2G05940,AT2G17220,AT2G46500,AT3G13690,AT3G48260,AT4G02010,AT4G03390,AT4G05200,AT4G08480,AT4G11530,AT4G14480,AT4G21380,AT4G23180,AT4G23220,AT4G27290,AT4G28880,AT4G32300,AT5G24080,AT5G35980,AT5G38280,AT5G40380,AT5G46330
GO:0008022	protein C-terminus binding	Pre-symbiosis (24 hour)	0.0343	0.0343	3	AT2G33540,AT4G12610,AT5G58003
GO:0006955	immune response	Pre-symbiosis (24 hour)	0.0368	0.0368	16	AT1G12220,AT2G17520,AT2G27040,AT2G41370,AT3G14470,AT3G17980,AT3G18165,AT3G25040,AT3G50930,AT4G04920,AT4G16950,AT4G21380,AT4G23100,AT4G37870,AT5G13160,AT5G62570
GO:0030004	cellular monovalent inorganic cation homeostasis	Pre-symbiosis (24 hour)	0.0382	0.0382	3	AT1G04120,AT2G46560,AT3G05030
GO:0051707	response to other organism	Physical Contact (24 hour)	0.047	0.047	52	AT1G01580,AT1G17615,AT1G31930,AT1G50030,AT1G79670,AT1G79680,AT2G03070,AT2G04450,AT2G05940,AT2G06050,AT2G17520,AT2G22370,AT2G23150,AT2G26560,AT2G34930,AT2G39200,AT2G39210,AT2G40140,AT2G43710,AT2G45220,AT2G47260,AT3G01280,AT3G11650,AT3G11820,AT3G17700,AT3G22640,AT3G48990,AT3G50930,AT3G51430,AT3G60240,AT4G05200,AT4G10490,AT4G11530,AT4G18360,AT4G21380,AT4G23180,AT4G23220,AT4G31180,AT4G34410,AT4G37370…
GO:0043207	response to external biotic stimulus	Physical Contact (24 hour)	0.0514	0.0514	52	AT1G01580,AT1G17615,AT1G31930,AT1G50030,AT1G79670,AT1G79680,AT2G03070,AT2G04450,AT2G05940,AT2G06050,AT2G17520,AT2G22370,AT2G23150,AT2G26560,AT2G34930,AT2G39200,AT2G39210,AT2G40140,AT2G43710,AT2G45220,AT2G47260,AT3G01280,AT3G11650,AT3G11820,AT3G17700,AT3G22640,AT3G48990,AT3G50930,AT3G51430,AT3G60240,AT4G05200,AT4G10490,AT4G11530,AT4G18360,AT4G21380,AT4G23180,AT4G23220,AT4G31180,AT4G34410,AT4G37370…
GO:0003674	molecular_function	Pre-symbiosis (24 hour)	0.0521	0.0521	587	AT1G01490,AT1G02420,AT1G02850,AT1G02970,AT1G03110,AT1G03670,AT1G04120,AT1G05910,AT1G06530,AT1G07960,AT1G08320,AT1G08370,AT1G09070,AT1G09290,AT1G09300,AT1G09700,AT1G10280,AT1G10520,AT1G11125,AT1G11190,AT1G11290,AT1G12220,AT1G12420,AT1G12700,AT1G12710,AT1G12740,AT1G12800,AT1G12940,AT1G13450,AT1G15080,AT1G15520,AT1G15950,AT1G16110,AT1G16120,AT1G16130,AT1G16160,AT1G16260,AT1G16350,AT1G17020,AT1G17110…
GO:0009607	response to biotic stimulus	Physical Contact (24 hour)	0.0529	0.0529	52	AT1G01580,AT1G17615,AT1G31930,AT1G50030,AT1G79670,AT1G79680,AT2G03070,AT2G04450,AT2G05940,AT2G06050,AT2G17520,AT2G22370,AT2G23150,AT2G26560,AT2G34930,AT2G39200,AT2G39210,AT2G40140,AT2G43710,AT2G45220,AT2G47260,AT3G01280,AT3G11650,AT3G11820,AT3G17700,AT3G22640,AT3G48990,AT3G50930,AT3G51430,AT3G60240,AT4G05200,AT4G10490,AT4G11530,AT4G18360,AT4G21380,AT4G23180,AT4G23220,AT4G31180,AT4G34410,AT4G37370…
GO:0097305	response to alcohol	Physical Contact (24 hour)	0.0532	0.0532	37	AT1G10840,AT1G17950,AT1G18390,AT1G18890,AT1G48630,AT1G50030,AT1G56600,AT1G77180,AT2G22370,AT2G36270,AT2G38940,AT2G39550,AT2G40170,AT3G08550,AT3G11820,AT3G14050,AT3G15730,AT3G16890,AT3G22060,AT3G23700,AT3G60240,AT3G63060,AT4G19810,AT4G21440,AT4G24960,AT4G35790,AT4G38630,AT4G39130,AT5G02310,AT5G11270,AT5G20720,AT5G35750,AT5G35980,AT5G40390,AT5G44120,AT5G50720,AT5G58560
GO:0055067	monovalent inorganic cation homeostasis	Pre-symbiosis (24 hour)	0.057	0.057	4	AT1G04120,AT2G46560,AT3G05030,AT5G02600
GO:0004672	protein kinase activity	Physical Contact (24 hour)	0.0578	0.0578	38	AT1G07870,AT1G16110,AT1G16130,AT1G18390,AT1G18890,AT1G24030,AT1G25390,AT1G34300,AT1G50030,AT1G52540,AT1G53420,AT1G60800,AT1G61390,AT1G79670,AT1G79680,AT2G05940,AT2G17220,AT2G46500,AT3G13690,AT3G48260,AT4G02010,AT4G03390,AT4G05200,AT4G08480,AT4G11530,AT4G14480,AT4G21380,AT4G23180,AT4G23220,AT4G27290,AT4G28880,AT4G32300,AT5G24080,AT5G35750,AT5G35980,AT5G38280,AT5G40380,AT5G46330
GO:0045089	positive regulation of innate immune response	Pre-symbiosis (24 hour)	0.0649	0.0649	6	AT2G41370,AT3G17980,AT3G18165,AT3G25040,AT4G04920,AT5G13160
GO:0022821	potassium ion antiporter activity	Pre-symbiosis (24 hour)	0.0711	0.0711	2	AT3G05030,AT5G13750
GO:1902477	regulation of defense response to bacterium, incompatible interaction	Pre-symbiosis (24 hour)	0.0762	0.0762	2	AT3G17980,AT5G62570
GO:0044238	primary metabolic process	Pre-symbiosis (24 hour)	0.0777	0.0777	188	AT1G02420,AT1G03110,AT1G05910,AT1G06920,AT1G08370,AT1G09290,AT1G10520,AT1G11290,AT1G12740,AT1G12800,AT1G13450,AT1G14790,AT1G16130,AT1G16260,AT1G16350,AT1G17110,AT1G21320,AT1G22770,AT1G27440,AT1G27980,AT1G31190,AT1G32340,AT1G33240,AT1G42440,AT1G47710,AT1G47720,AT1G48650,AT1G50410,AT1G53920,AT1G61390,AT1G61550,AT1G61820,AT1G63970,AT1G67080,AT1G69040,AT1G69070,AT1G71696,AT1G72710,AT1G75500,AT1G75540…
GO:0016301	kinase activity	Physical Contact (24 hour)	0.0778	0.0778	43	AT1G07870,AT1G16110,AT1G16130,AT1G18390,AT1G18890,AT1G24030,AT1G25390,AT1G34300,AT1G50030,AT1G52540,AT1G53420,AT1G55810,AT1G60800,AT1G61390,AT1G79670,AT1G79680,AT2G05940,AT2G14750,AT2G17220,AT2G46500,AT3G13690,AT3G21070,AT3G48260,AT4G02010,AT4G03390,AT4G05200,AT4G08480,AT4G11530,AT4G14480,AT4G21380,AT4G23180,AT4G23220,AT4G27290,AT4G28880,AT4G32300,AT5G13280,AT5G24080,AT5G35750,AT5G35980,AT5G38280…
GO:0007165	signal transduction	Pre-symbiosis (24 hour)	0.084	0.084	79	AT1G03670,AT1G04120,AT1G08320,AT1G12290,AT1G16110,AT1G16120,AT1G16130,AT1G16160,AT1G16260,AT1G18390,AT1G21270,AT1G25390,AT1G31190,AT1G42990,AT1G52520,AT1G53350,AT1G59780,AT1G62810,AT1G63500,AT1G68360,AT1G69730,AT1G75500,AT1G79460,AT1G79670,AT1G79680,AT2G05940,AT2G13600,AT2G17520,AT2G23460,AT2G26040,AT2G26980,AT2G28250,AT2G28940,AT2G29100,AT2G29120,AT2G31500,AT2G33540,AT2G39550,AT2G41370,AT2G43710…
GO:0002684	positive regulation of immune system process	Pre-symbiosis (24 hour)	0.0865	0.0865	6	AT2G41370,AT3G17980,AT3G18165,AT3G25040,AT4G04920,AT5G13160
GO:0050778	positive regulation of immune response	Pre-symbiosis (24 hour)	0.0865	0.0865	6	AT2G41370,AT3G17980,AT3G18165,AT3G25040,AT4G04920,AT5G13160
GO:0044728	DNA methylation or demethylation	Pre-symbiosis (24 hour)	0.0873	0.0873	9	AT1G05910,AT1G50410,AT2G27040,AT3G17310,AT3G49250,AT4G31270,AT5G04290,AT5G14620,AT5G58130
GO:0045088	regulation of innate immune response	Pre-symbiosis (24 hour)	0.0881	0.0881	5	AT2G41370,AT3G17980,AT3G18165,AT4G04920,AT5G62570
GO:0009845	seed germination	Physical Contact (24 hour)	0.0887	0.0887	15	AT1G03790,AT1G48630,AT1G75220,AT2G20180,AT2G34900,AT2G36270,AT3G15730,AT3G48990,AT3G63060,AT4G18550,AT4G38630,AT5G02310,AT5G35750,AT5G53180,AT5G55630
GO:2001009	regulation of plant-type cell wall cellulose biosynthetic process	Pre-symbiosis (24 hour)	0.0889	0.0889	2	AT3G08550,AT4G04920
GO:0030003	cellular cation homeostasis	Pre-symbiosis (24 hour)	0.0922	0.0922	5	AT1G04120,AT2G46560,AT3G05030,AT4G37270,AT5G02600
GO:0009814	defense response, incompatible interaction	Pre-symbiosis (24 hour)	0.0935	0.0935	11	AT1G12220,AT2G17520,AT2G27040,AT3G17980,AT4G04920,AT4G16950,AT4G21380,AT4G23100,AT4G37870,AT5G13160,AT5G62570
GO:0065008	regulation of biological quality	Pre-symbiosis (24 hour)	0.0943	0.0943	6	AT1G33240,AT2G46560,AT3G05030,AT4G35160,AT4G37270,AT5G13750
GO:0009737	response to abscisic acid	Physical Contact (24 hour)	0.0952	0.0952	36	AT1G10840,AT1G17950,AT1G18390,AT1G18890,AT1G48630,AT1G56600,AT1G77180,AT2G22370,AT2G36270,AT2G38940,AT2G39550,AT2G40170,AT3G08550,AT3G11820,AT3G14050,AT3G15730,AT3G16890,AT3G22060,AT3G23700,AT3G60240,AT3G63060,AT4G19810,AT4G21440,AT4G24960,AT4G35790,AT4G38630,AT4G39130,AT5G02310,AT5G11270,AT5G20720,AT5G35750,AT5G35980,AT5G40390,AT5G44120,AT5G50720,AT5G58560
GO:0034220	ion transmembrane transport	Pre-symbiosis (24 hour)	0.0971	0.0971	22	AT1G25530,AT1G31260,AT1G47670,AT1G55910,AT1G73190,AT1G77380,AT2G31500,AT2G37170,AT2G39130,AT2G41705,AT3G05030,AT3G30390,AT3G54820,AT4G00430,AT4G05590,AT4G23400,AT4G33520,AT4G33950,AT5G03570,AT5G20480,AT5G62000,ATMG01360
GO:0007154	cell communication	Pre-symbiosis (24 hour)	0.0996	0.0996	89	AT1G03670,AT1G04120,AT1G08320,AT1G12290,AT1G16110,AT1G16120,AT1G16130,AT1G16160,AT1G16260,AT1G18390,AT1G21270,AT1G25390,AT1G27880,AT1G31190,AT1G33240,AT1G42990,AT1G52520,AT1G53350,AT1G59780,AT1G62810,AT1G63500,AT1G68320,AT1G68360,AT1G69730,AT1G75500,AT1G79460,AT1G79670,AT1G79680,AT2G05940,AT2G13600,AT2G17520,AT2G23460,AT2G26040,AT2G26980,AT2G28250,AT2G28940,AT2G29100,AT2G29120,AT2G31500,AT2G33540…
GO:0016773	phosphotransferase activity, alcohol group as acceptor	Physical Contact (24 hour)	0.101	0.101	41	AT1G07870,AT1G16110,AT1G16130,AT1G18390,AT1G18890,AT1G24030,AT1G25390,AT1G34300,AT1G50030,AT1G52540,AT1G53420,AT1G60800,AT1G61390,AT1G79670,AT1G79680,AT2G05940,AT2G14750,AT2G17220,AT2G46500,AT3G13690,AT3G21070,AT3G48260,AT4G02010,AT4G03390,AT4G05200,AT4G08480,AT4G11530,AT4G14480,AT4G21380,AT4G23180,AT4G23220,AT4G27290,AT4G28880,AT4G32300,AT5G24080,AT5G35750,AT5G35980,AT5G38280,AT5G40380,AT5G46330…
GO:0043231	intracellular membrane-bounded organelle	Pre-symbiosis (24 hour)	0.106	0.106	358	AT1G01650,AT1G02020,AT1G02420,AT1G03110,AT1G03370,AT1G04120,AT1G05910,AT1G06530,AT1G07960,AT1G08320,AT1G08400,AT1G09070,AT1G09300,AT1G09700,AT1G11290,AT1G12800,AT1G12940,AT1G13160,AT1G13450,AT1G17110,AT1G18640,AT1G20830,AT1G21460,AT1G21480,AT1G21770,AT1G22360,AT1G22380,AT1G22410,AT1G22610,AT1G22770,AT1G22850,AT1G23380,AT1G23450,AT1G26170,AT1G26340,AT1G27100,AT1G27170,AT1G27980,AT1G28580,AT1G31170…
GO:0009605	response to external stimulus	Physical Contact (24 hour)	0.109	0.109	64	AT1G01580,AT1G15330,AT1G17615,AT1G18390,AT1G31930,AT1G43700,AT1G50030,AT1G60420,AT1G79670,AT1G79680,AT2G03070,AT2G04450,AT2G05940,AT2G06050,AT2G17520,AT2G20180,AT2G22370,AT2G23150,AT2G26560,AT2G34930,AT2G36810,AT2G39200,AT2G39210,AT2G40140,AT2G43710,AT2G45220,AT2G47260,AT3G01280,AT3G05740,AT3G11650,AT3G11820,AT3G17700,AT3G22640,AT3G48990,AT3G50930,AT3G51430,AT3G60240,AT4G00730,AT4G05200,AT4G10490…
GO:0031090	organelle membrane	Pre-symbiosis (24 hour)	0.11	0.11	9	AT1G04120,AT1G71696,AT1G74240,AT2G38670,AT3G05030,AT3G48820,AT3G50930,AT3G51870,AT5G13750
GO:0002376	immune system process	Pre-symbiosis (24 hour)	0.111	0.111	16	AT1G12220,AT2G17520,AT2G27040,AT2G41370,AT3G14470,AT3G17980,AT3G18165,AT3G25040,AT3G50930,AT4G04920,AT4G16950,AT4G21380,AT4G23100,AT4G37870,AT5G13160,AT5G62570
GO:0044424	intracellular part	Pre-symbiosis (24 hour)	0.117	0.117	431	AT1G01490,AT1G01650,AT1G02020,AT1G02420,AT1G03110,AT1G03370,AT1G04120,AT1G05910,AT1G06530,AT1G07960,AT1G08320,AT1G08370,AT1G08400,AT1G09070,AT1G09300,AT1G09700,AT1G11290,AT1G12800,AT1G12940,AT1G13160,AT1G13450,AT1G15950,AT1G16350,AT1G17110,AT1G18640,AT1G20060,AT1G20830,AT1G21170,AT1G21460,AT1G21480,AT1G21770,AT1G22360,AT1G22380,AT1G22410,AT1G22610,AT1G22770,AT1G22850,AT1G23380,AT1G23450,AT1G26170…
GO:0050776	regulation of immune response	Pre-symbiosis (24 hour)	0.118	0.118	5	AT2G41370,AT3G17980,AT3G18165,AT4G04920,AT5G62570
GO:0050789	regulation of biological process	Pre-symbiosis (24 hour)	0.119	0.119	116	AT1G04120,AT1G05910,AT1G06920,AT1G08320,AT1G08370,AT1G11060,AT1G12290,AT1G13450,AT1G14790,AT1G16260,AT1G18390,AT1G18750,AT1G22770,AT1G29170,AT1G31190,AT1G32340,AT1G33240,AT1G42990,AT1G47710,AT1G47720,AT1G62810,AT1G67080,AT1G69040,AT1G72710,AT1G75500,AT1G75540,AT1G79460,AT1G79680,AT2G05940,AT2G13600,AT2G17520,AT2G22090,AT2G23380,AT2G23460,AT2G26040,AT2G26980,AT2G27040,AT2G28940,AT2G29100,AT2G32710…
GO:0006811	ion transport	Pre-symbiosis (24 hour)	0.122	0.122	41	AT1G01490,AT1G12940,AT1G15520,AT1G25530,AT1G31260,AT1G47670,AT1G55910,AT1G73190,AT1G77380,AT2G13620,AT2G29100,AT2G29120,AT2G31500,AT2G37170,AT2G39130,AT2G41705,AT3G05030,AT3G06130,AT3G26570,AT3G30390,AT3G44900,AT3G54820,AT4G00430,AT4G03560,AT4G05590,AT4G13510,AT4G16380,AT4G18910,AT4G23400,AT4G24230,AT4G33520,AT4G33950,AT4G35290,AT5G02600,AT5G03570,AT5G20480,AT5G40780,AT5G44070,AT5G48400,AT5G62000…
GO:0090333	regulation of stomatal closure	Pre-symbiosis (24 hour)	0.124	0.124	2	AT3G05030,AT5G13750
GO:0006873	cellular ion homeostasis	Pre-symbiosis (24 hour)	0.127	0.127	5	AT1G04120,AT2G46560,AT3G05030,AT4G37270,AT5G02600
GO:0005622	intracellular	Pre-symbiosis (24 hour)	0.128	0.128	434	AT1G01490,AT1G01650,AT1G02020,AT1G02420,AT1G03110,AT1G03370,AT1G04120,AT1G05910,AT1G06530,AT1G07960,AT1G08320,AT1G08370,AT1G08400,AT1G09070,AT1G09300,AT1G09700,AT1G11290,AT1G12220,AT1G12800,AT1G12940,AT1G13160,AT1G13450,AT1G15950,AT1G16350,AT1G17110,AT1G18640,AT1G20060,AT1G20830,AT1G21170,AT1G21460,AT1G21480,AT1G21770,AT1G22360,AT1G22380,AT1G22410,AT1G22610,AT1G22770,AT1G22850,AT1G23380,AT1G23450…
GO:0071944	cell periphery	Pre-symbiosis (24 hour)	0.13	0.13	167	AT1G06840,AT1G09070,AT1G10140,AT1G12220,AT1G12290,AT1G12940,AT1G15080,AT1G15520,AT1G16110,AT1G16120,AT1G16130,AT1G16160,AT1G16260,AT1G17120,AT1G18390,AT1G21170,AT1G21460,AT1G22150,AT1G25390,AT1G25530,AT1G31260,AT1G34750,AT1G47670,AT1G49480,AT1G52310,AT1G53350,AT1G59780,AT1G60890,AT1G61000,AT1G61390,AT1G61550,AT1G63500,AT1G65730,AT1G68560,AT1G68570,AT1G69730,AT1G72710,AT1G73190,AT1G75280,AT1G75500…
GO:0010033	response to organic substance	Pre-symbiosis (24 hour)	0.143	0.143	102	AT1G04120,AT1G08320,AT1G09700,AT1G12420,AT1G14790,AT1G15520,AT1G16350,AT1G18390,AT1G21270,AT1G42990,AT1G50420,AT1G62810,AT1G63500,AT1G68320,AT1G68360,AT1G69040,AT1G75500,AT1G79460,AT1G79680,AT1G80080,AT1G80460,AT2G04160,AT2G06010,AT2G13600,AT2G14580,AT2G17520,AT2G22370,AT2G26040,AT2G26980,AT2G27040,AT2G29100,AT2G29120,AT2G30470,AT2G31500,AT2G33540,AT2G37170,AT2G38280,AT2G39550,AT2G41370,AT2G43710…
GO:0043227	membrane-bounded organelle	Pre-symbiosis (24 hour)	0.144	0.144	379	AT1G01650,AT1G02020,AT1G02420,AT1G03110,AT1G03370,AT1G04120,AT1G05910,AT1G06530,AT1G07960,AT1G08320,AT1G08400,AT1G09070,AT1G09300,AT1G09700,AT1G11290,AT1G12800,AT1G12940,AT1G13160,AT1G13450,AT1G17110,AT1G17120,AT1G18640,AT1G20830,AT1G21460,AT1G21480,AT1G21770,AT1G22060,AT1G22360,AT1G22380,AT1G22410,AT1G22610,AT1G22770,AT1G22850,AT1G23380,AT1G23450,AT1G26170,AT1G26340,AT1G27100,AT1G27170,AT1G27880…
GO:0010981	regulation of cell wall macromolecule metabolic process	Pre-symbiosis (24 hour)	0.148	0.148	2	AT3G08550,AT4G04920
GO:0033993	response to lipid	Physical Contact (24 hour)	0.148	0.148	43	AT1G10840,AT1G17950,AT1G18390,AT1G18890,AT1G48630,AT1G50030,AT1G50420,AT1G56600,AT1G69530,AT1G77180,AT2G20180,AT2G22370,AT2G36270,AT2G38940,AT2G39550,AT2G40170,AT2G45660,AT3G08550,AT3G11820,AT3G14050,AT3G15730,AT3G16890,AT3G22060,AT3G23700,AT3G60240,AT3G61460,AT3G63060,AT4G19810,AT4G21440,AT4G24960,AT4G35790,AT4G38630,AT4G39130,AT5G02310,AT5G11270,AT5G20720,AT5G35750,AT5G35980,AT5G40390,AT5G44120…
GO:0002682	regulation of immune system process	Pre-symbiosis (24 hour)	0.162	0.162	5	AT2G41370,AT3G17980,AT3G18165,AT4G04920,AT5G62570
GO:0065007	biological regulation	Pre-symbiosis (24 hour)	0.168	0.168	218	AT1G01490,AT1G02970,AT1G03670,AT1G04120,AT1G05910,AT1G06230,AT1G06920,AT1G08320,AT1G08370,AT1G09300,AT1G09700,AT1G11060,AT1G12290,AT1G12740,AT1G13450,AT1G14790,AT1G16110,AT1G16120,AT1G16130,AT1G16160,AT1G16260,AT1G18390,AT1G18750,AT1G21270,AT1G22770,AT1G25390,AT1G28310,AT1G29170,AT1G29420,AT1G29450,AT1G31190,AT1G32340,AT1G32750,AT1G33240,AT1G42990,AT1G47710,AT1G47720,AT1G50410,AT1G50420,AT1G52520…
GO:0006528	asparagine metabolic process	Pre-symbiosis (24 hour)	0.171	0.171	2	AT2G03667,AT3G47340
GO:0006529	asparagine biosynthetic process	Pre-symbiosis (24 hour)	0.171	0.171	2	AT2G03667,AT3G47340
GO:0017096	acetylserotonin O-methyltransferase activity	Pre-symbiosis (24 hour)	0.176	0.176	1	AT4G35160
GO:0140096	catalytic activity, acting on a protein	Physical Contact (24 hour)	0.194	0.194	75	AT1G02170,AT1G03220,AT1G06260,AT1G07870,AT1G08030,AT1G11530,AT1G16110,AT1G16130,AT1G17280,AT1G18390,AT1G18890,AT1G24030,AT1G25390,AT1G34300,AT1G50030,AT1G51690,AT1G52540,AT1G53025,AT1G53420,AT1G60800,AT1G61390,AT1G61620,AT1G67856,AT1G79670,AT1G79680,AT2G04160,AT2G05940,AT2G17220,AT2G36670,AT2G42350,AT2G45040,AT2G46500,AT2G47940,AT3G13690,AT3G14250,AT3G15355,AT3G17205,AT3G48260,AT3G52450,AT3G54940…
GO:1901068	guanosine-containing compound metabolic process	Pre-symbiosis (24 hour)	0.21	0.21	4	AT1G03110,AT1G16350,AT3G26410,AT5G47680
GO:0010243	response to organonitrogen compound	Physical Contact (24 hour)	0.21	0.21	19	AT1G17280,AT1G45000,AT1G50030,AT1G71520,AT2G24720,AT2G26150,AT2G33710,AT2G36270,AT2G37430,AT2G40140,AT3G52450,AT3G58030,AT3G61460,AT4G08480,AT4G27030,AT4G34410,AT5G25910,AT5G48655,AT5G51190
GO:0016020	membrane	Pre-symbiosis (24 hour)	0.217	0.217	235	AT1G01650,AT1G03670,AT1G04120,AT1G06530,AT1G06840,AT1G09070,AT1G10140,AT1G12220,AT1G12290,AT1G12940,AT1G15080,AT1G15520,AT1G16110,AT1G16120,AT1G16130,AT1G16160,AT1G16260,AT1G17120,AT1G18390,AT1G20830,AT1G21460,AT1G22150,AT1G22410,AT1G24020,AT1G25390,AT1G25530,AT1G26340,AT1G27980,AT1G31260,AT1G34000,AT1G34750,AT1G42990,AT1G44750,AT1G45616,AT1G47670,AT1G49480,AT1G52310,AT1G52360,AT1G53210,AT1G53350…
GO:0052324	plant-type cell wall cellulose biosynthetic process	Pre-symbiosis (24 hour)	0.221	0.221	2	AT3G08550,AT4G04920
GO:0023052	signaling	Pre-symbiosis (24 hour)	0.239	0.239	79	AT1G03670,AT1G04120,AT1G08320,AT1G12290,AT1G16110,AT1G16120,AT1G16130,AT1G16160,AT1G16260,AT1G18390,AT1G21270,AT1G25390,AT1G31190,AT1G42990,AT1G52520,AT1G53350,AT1G59780,AT1G62810,AT1G63500,AT1G68360,AT1G69730,AT1G75500,AT1G79460,AT1G79670,AT1G79680,AT2G05940,AT2G13600,AT2G17520,AT2G23460,AT2G26040,AT2G26980,AT2G28250,AT2G28940,AT2G29100,AT2G29120,AT2G31500,AT2G33540,AT2G39550,AT2G41370,AT2G43710…
GO:0055082	cellular chemical homeostasis	Pre-symbiosis (24 hour)	0.24	0.24	5	AT1G04120,AT2G46560,AT3G05030,AT4G37270,AT5G02600
GO:0009058	biosynthetic process	Pre-symbiosis (24 hour)	0.241	0.241	64	AT1G13450,AT1G14790,AT1G15950,AT1G16350,AT1G33240,AT1G61820,AT1G62810,AT1G63970,AT1G67080,AT1G72680,AT1G75540,AT1G79680,AT1G80460,AT2G03667,AT2G22530,AT2G38670,AT2G45660,AT2G47760,AT3G04070,AT3G06350,AT3G07650,AT3G08550,AT3G15010,AT3G16810,AT3G20390,AT3G20770,AT3G24490,AT3G26330,AT3G27100,AT3G47340,AT3G47450,AT3G48280,AT3G48820,AT3G52970,AT3G54610,AT3G57670,AT3G58560,AT4G01070,AT4G04920,AT4G17880…
GO:0003676	nucleic acid binding	Pre-symbiosis (24 hour)	0.243	0.243	47	AT1G02420,AT1G08370,AT1G09290,AT1G11290,AT1G12800,AT1G13450,AT1G33240,AT1G42440,AT1G47720,AT1G48650,AT1G75540,AT1G76010,AT1G76460,AT2G13600,AT2G22090,AT2G23380,AT2G29190,AT2G36240,AT2G41720,AT2G45660,AT3G03340,AT3G04070,AT3G13300,AT3G13570,AT3G15010,AT3G16810,AT3G18990,AT3G20770,AT3G21175,AT3G24490,AT3G29290,AT3G54610,AT3G56850,AT4G04370,AT4G19890,AT4G22140,AT4G23980,AT4G26060,AT4G31270,AT4G36650…
GO:0016139	glycoside catabolic process	Physical Contact (24 hour)	0.254	0.254	1	AT5G10300
GO:0046593	mandelonitrile lyase activity	Physical Contact (24 hour)	0.254	0.254	1	AT5G10300
GO:0016462	pyrophosphatase activity	Pre-symbiosis (24 hour)	0.258	0.258	39	AT1G04120,AT1G05910,AT1G15520,AT1G20060,AT1G27880,AT1G31970,AT1G42440,AT1G48650,AT1G80350,AT2G17690,AT2G23460,AT2G29940,AT2G37280,AT3G04340,AT3G05740,AT3G06480,AT3G13170,AT3G19050,AT3G19960,AT3G21180,AT3G22880,AT3G27730,AT3G47450,AT3G60160,AT3G63380,AT4G09730,AT4G33200,AT4G34910,AT4G37270,AT5G03080,AT5G04930,AT5G20110,AT5G40010,AT5G44070,AT5G47650,AT5G51280,AT5G54280,AT5G60740,AT5G61140
GO:0005634	nucleus	Pre-symbiosis (24 hour)	0.259	0.259	162	AT1G03110,AT1G05910,AT1G08320,AT1G09700,AT1G12800,AT1G13160,AT1G13450,AT1G17110,AT1G22770,AT1G23380,AT1G26170,AT1G32750,AT1G33240,AT1G42990,AT1G49480,AT1G50420,AT1G52520,AT1G67580,AT1G68360,AT1G68480,AT1G69070,AT1G72050,AT1G72710,AT1G72830,AT1G75230,AT1G75540,AT1G80350,AT2G04660,AT2G17690,AT2G18220,AT2G22090,AT2G22370,AT2G23380,AT2G23460,AT2G25430,AT2G26040,AT2G26980,AT2G27040,AT2G28910,AT2G30470…
GO:0043229	intracellular organelle	Pre-symbiosis (24 hour)	0.261	0.261	153	AT1G01650,AT1G02020,AT1G02420,AT1G03370,AT1G04120,AT1G07960,AT1G08370,AT1G09070,AT1G11290,AT1G12800,AT1G12940,AT1G13450,AT1G20060,AT1G21460,AT1G22410,AT1G22610,AT1G22850,AT1G23380,AT1G26170,AT1G31170,AT1G31190,AT1G33240,AT1G34630,AT1G42990,AT1G47720,AT1G53210,AT1G63970,AT1G67080,AT1G69070,AT1G71696,AT1G73110,AT1G74240,AT1G75500,AT1G75540,AT1G80350,AT1G80460,AT2G13600,AT2G19950,AT2G22090,AT2G22530…
GO:0003729	mRNA binding	Pre-symbiosis (24 hour)	0.264	0.264	20	AT1G08370,AT1G12800,AT1G76010,AT1G76460,AT2G22090,AT2G29190,AT2G37170,AT3G03340,AT3G13300,AT3G13570,AT3G15010,AT3G16810,AT3G49430,AT3G52660,AT3G55460,AT4G35890,AT5G04290,AT5G19350,AT5G21160,AT5G53180
GO:0090351	seedling development	Physical Contact (24 hour)	0.265	0.265	15	AT1G03790,AT1G48630,AT1G75220,AT2G20180,AT2G34900,AT2G36270,AT3G15730,AT3G48990,AT3G63060,AT4G18550,AT4G38630,AT5G02310,AT5G35750,AT5G53180,AT5G55630
GO:1901379	regulation of potassium ion transmembrane transport	Pre-symbiosis (24 hour)	0.277	0.277	3	AT2G31500,AT4G05590,AT5G62000
GO:0055075	potassium ion homeostasis	Pre-symbiosis (24 hour)	0.294	0.294	2	AT1G04120,AT3G05030
GO:0043226	organelle	Pre-symbiosis (24 hour)	0.299	0.299	153	AT1G01650,AT1G02020,AT1G02420,AT1G03370,AT1G04120,AT1G07960,AT1G08370,AT1G09070,AT1G11290,AT1G12800,AT1G12940,AT1G13450,AT1G20060,AT1G21460,AT1G22410,AT1G22610,AT1G22850,AT1G23380,AT1G26170,AT1G31170,AT1G31190,AT1G33240,AT1G34630,AT1G42990,AT1G47720,AT1G53210,AT1G63970,AT1G67080,AT1G69070,AT1G71696,AT1G73110,AT1G74240,AT1G75500,AT1G75540,AT1G80350,AT1G80460,AT2G13600,AT2G19950,AT2G22090,AT2G22530…
GO:2001006	regulation of cellulose biosynthetic process	Pre-symbiosis (24 hour)	0.309	0.309	2	AT3G08550,AT4G04920
GO:0009719	response to endogenous stimulus	Pre-symbiosis (24 hour)	0.31	0.31	82	AT1G04120,AT1G09700,AT1G12420,AT1G15520,AT1G16350,AT1G18390,AT1G50420,AT1G62810,AT1G63500,AT1G68360,AT1G69040,AT1G75500,AT1G79460,AT1G80080,AT2G04160,AT2G14580,AT2G22370,AT2G26040,AT2G26980,AT2G29100,AT2G29120,AT2G30470,AT2G31500,AT2G33540,AT2G37170,AT2G38280,AT2G39550,AT2G41370,AT2G43710,AT2G45200,AT2G45660,AT2G47260,AT3G07360,AT3G08550,AT3G12380,AT3G13300,AT3G17980,AT3G20770,AT3G23240,AT3G26040…
GO:0016070	RNA metabolic process	Pre-symbiosis (24 hour)	0.317	0.317	80	AT1G02420,AT1G03110,AT1G05910,AT1G06920,AT1G08370,AT1G09290,AT1G11290,AT1G12800,AT1G13450,AT1G14790,AT1G21320,AT1G22770,AT1G33240,AT1G42440,AT1G48650,AT1G69070,AT1G75540,AT1G77170,AT2G13600,AT2G17520,AT2G22090,AT2G27040,AT2G29210,AT2G33540,AT2G36240,AT2G41720,AT2G45660,AT3G03340,AT3G07650,AT3G13300,AT3G13570,AT3G16260,AT3G20770,AT3G24490,AT3G27100,AT3G27730,AT3G29290,AT3G49430,AT3G52210,AT3G54610…
GO:0017111	nucleoside-triphosphatase activity	Pre-symbiosis (24 hour)	0.32	0.32	37	AT1G04120,AT1G05910,AT1G15520,AT1G20060,AT1G27880,AT1G31970,AT1G42440,AT1G48650,AT1G80350,AT2G17690,AT2G23460,AT2G29940,AT2G37280,AT3G04340,AT3G05740,AT3G06480,AT3G13170,AT3G19050,AT3G19960,AT3G21180,AT3G22880,AT3G27730,AT3G47450,AT3G60160,AT3G63380,AT4G09730,AT4G33200,AT4G34910,AT4G37270,AT5G04930,AT5G20110,AT5G40010,AT5G44070,AT5G51280,AT5G54280,AT5G60740,AT5G61140
GO:0010072	primary shoot apical meristem specification	Pre-symbiosis (24 hour)	0.321	0.321	4	AT1G30490,AT2G34710,AT3G13300,AT5G27030
GO:0006139	nucleobase-containing compound metabolic process	Pre-symbiosis (24 hour)	0.325	0.325	99	AT1G02420,AT1G03110,AT1G05910,AT1G06920,AT1G08370,AT1G09290,AT1G10520,AT1G11290,AT1G12800,AT1G13450,AT1G14790,AT1G16350,AT1G21320,AT1G22770,AT1G33240,AT1G42440,AT1G47720,AT1G48650,AT1G69070,AT1G75540,AT1G77170,AT1G79680,AT2G13600,AT2G17520,AT2G17690,AT2G22090,AT2G23380,AT2G27040,AT2G29210,AT2G33540,AT2G36240,AT2G41720,AT2G45660,AT3G03340,AT3G05740,AT3G07650,AT3G12380,AT3G13300,AT3G13570,AT3G16260…
GO:0031349	positive regulation of defense response	Pre-symbiosis (24 hour)	0.326	0.326	7	AT2G41370,AT3G17980,AT3G18165,AT3G25040,AT4G04920,AT4G35580,AT5G13160
GO:0015770	sucrose transport	Physical Contact (24 hour)	0.327	0.327	3	AT2G02860,AT4G32770,AT5G23660
GO:0016818	hydrolase activity, acting on acid anhydrides, in phosphorus-containing anhydrides	Pre-symbiosis (24 hour)	0.328	0.328	39	AT1G04120,AT1G05910,AT1G15520,AT1G20060,AT1G27880,AT1G31970,AT1G42440,AT1G48650,AT1G80350,AT2G17690,AT2G23460,AT2G29940,AT2G37280,AT3G04340,AT3G05740,AT3G06480,AT3G13170,AT3G19050,AT3G19960,AT3G21180,AT3G22880,AT3G27730,AT3G47450,AT3G60160,AT3G63380,AT4G09730,AT4G33200,AT4G34910,AT4G37270,AT5G03080,AT5G04930,AT5G20110,AT5G40010,AT5G44070,AT5G47650,AT5G51280,AT5G54280,AT5G60740,AT5G61140
GO:0005737	cytoplasm	Physical Contact (24 hour)	0.334	0.334	285	AT1G01490,AT1G03220,AT1G03360,AT1G04200,AT1G04760,AT1G06260,AT1G06470,AT1G06510,AT1G06890,AT1G07080,AT1G07705,AT1G08030,AT1G08480,AT1G08770,AT1G09070,AT1G10270,AT1G10840,AT1G11530,AT1G13560,AT1G17280,AT1G18890,AT1G21065,AT1G21460,AT1G21720,AT1G21770,AT1G22620,AT1G22850,AT1G26340,AT1G27170,AT1G28150,AT1G30960,AT1G32070,AT1G32400,AT1G32580,AT1G33330,AT1G34000,AT1G34360,AT1G36280,AT1G43700,AT1G45000…
GO:0010073	meristem maintenance	Pre-symbiosis (24 hour)	0.344	0.344	6	AT1G23380,AT2G41370,AT2G45660,AT3G08550,AT3G12380,AT5G24740
GO:0007166	cell surface receptor signaling pathway	Pre-symbiosis (24 hour)	0.344	0.344	20	AT1G16110,AT1G16120,AT1G16130,AT1G16160,AT1G16260,AT1G18390,AT1G21270,AT1G25390,AT1G63500,AT1G69730,AT1G79670,AT1G79680,AT2G05940,AT2G28250,AT2G28940,AT3G24550,AT3G57120,AT4G03390,AT5G13160,AT5G18910
GO:1901361	organic cyclic compound catabolic process	Pre-symbiosis (24 hour)	0.349	0.349	11	AT1G08370,AT2G22090,AT3G13300,AT4G10490,AT4G22920,AT4G34900,AT5G04900,AT5G12200,AT5G21160,AT5G53970,AT5G64370
GO:0030186	melatonin metabolic process	Pre-symbiosis (24 hour)	0.352	0.352	1	AT4G35160
GO:0030187	melatonin biosynthetic process	Pre-symbiosis (24 hour)	0.352	0.352	1	AT4G35160
GO:0010467	gene expression	Pre-symbiosis (24 hour)	0.363	0.363	76	AT1G03110,AT1G05910,AT1G06920,AT1G08370,AT1G09290,AT1G12800,AT1G13450,AT1G14790,AT1G21320,AT1G22770,AT1G33240,AT1G42440,AT1G48650,AT1G69070,AT1G71696,AT1G75540,AT2G17520,AT2G22090,AT2G23380,AT2G27040,AT2G29210,AT2G31440,AT2G33540,AT2G41620,AT2G41720,AT2G45660,AT3G03340,AT3G07650,AT3G13300,AT3G13570,AT3G16260,AT3G16810,AT3G20770,AT3G24490,AT3G27100,AT3G49430,AT3G52210,AT3G54610,AT3G55460,AT3G57670…
GO:0016787	hydrolase activity	Pre-symbiosis (24 hour)	0.366	0.366	117	AT1G02420,AT1G02850,AT1G04120,AT1G05910,AT1G09300,AT1G09700,AT1G11190,AT1G11290,AT1G12700,AT1G15080,AT1G17110,AT1G18640,AT1G20060,AT1G23450,AT1G27880,AT1G31190,AT1G31970,AT1G42440,AT1G48650,AT1G53920,AT1G61820,AT1G63130,AT1G68560,AT1G71696,AT1G75230,AT1G77170,AT1G80150,AT1G80350,AT2G03800,AT2G13600,AT2G17520,AT2G17690,AT2G23460,AT2G27040,AT2G29940,AT2G31440,AT2G33540,AT2G36240,AT2G37280,AT2G41720…
GO:0090304	nucleic acid metabolic process	Pre-symbiosis (24 hour)	0.393	0.393	88	AT1G02420,AT1G03110,AT1G05910,AT1G06920,AT1G08370,AT1G09290,AT1G10520,AT1G11290,AT1G12800,AT1G13450,AT1G14790,AT1G21320,AT1G22770,AT1G33240,AT1G42440,AT1G47720,AT1G48650,AT1G69070,AT1G75540,AT1G77170,AT2G13600,AT2G17520,AT2G22090,AT2G27040,AT2G29210,AT2G33540,AT2G36240,AT2G41720,AT2G45660,AT3G03340,AT3G05740,AT3G07650,AT3G12380,AT3G13300,AT3G13570,AT3G16260,AT3G20770,AT3G24490,AT3G27100,AT3G27730…
GO:0000325	plant-type vacuole	Pre-symbiosis (24 hour)	0.402	0.402	14	AT1G04120,AT1G09070,AT1G12940,AT1G53210,AT1G75500,AT3G55120,AT3G60160,AT4G03560,AT5G03570,AT5G13750,AT5G13930,AT5G46610,AT5G50260,AT5G55630
GO:0016817	hydrolase activity, acting on acid anhydrides	Pre-symbiosis (24 hour)	0.402	0.402	39	AT1G04120,AT1G05910,AT1G15520,AT1G20060,AT1G27880,AT1G31970,AT1G42440,AT1G48650,AT1G80350,AT2G17690,AT2G23460,AT2G29940,AT2G37280,AT3G04340,AT3G05740,AT3G06480,AT3G13170,AT3G19050,AT3G19960,AT3G21180,AT3G22880,AT3G27730,AT3G47450,AT3G60160,AT3G63380,AT4G09730,AT4G33200,AT4G34910,AT4G37270,AT5G03080,AT5G04930,AT5G20110,AT5G40010,AT5G44070,AT5G47650,AT5G51280,AT5G54280,AT5G60740,AT5G61140
GO:0006810	transport	Pre-symbiosis (24 hour)	0.403	0.403	92	AT1G01490,AT1G04120,AT1G09070,AT1G12940,AT1G15520,AT1G21170,AT1G25530,AT1G26170,AT1G29420,AT1G29450,AT1G31260,AT1G44750,AT1G47670,AT1G51160,AT1G52360,AT1G54710,AT1G54730,AT1G55910,AT1G65730,AT1G73190,AT1G73700,AT1G74240,AT1G75500,AT1G77380,AT2G13620,AT2G19950,AT2G21600,AT2G29100,AT2G29120,AT2G29530,AT2G29940,AT2G30710,AT2G31500,AT2G34360,AT2G37170,AT2G37280,AT2G39130,AT2G41620,AT2G41705,AT2G45200…
GO:0071944	cell periphery	Physical Contact (24 hour)	0.403	0.403	109	AT1G01580,AT1G01800,AT1G03220,AT1G04760,AT1G07870,AT1G08420,AT1G09070,AT1G10200,AT1G12280,AT1G16110,AT1G16130,AT1G18390,AT1G18890,AT1G21460,AT1G24030,AT1G25270,AT1G25390,AT1G31930,AT1G34300,AT1G45000,AT1G52540,AT1G53420,AT1G55850,AT1G60800,AT1G61390,AT1G69530,AT1G71900,AT1G77210,AT1G78830,AT1G79670,AT1G79680,AT2G01600,AT2G05940,AT2G09990,AT2G17220,AT2G25430,AT2G26530,AT2G26650,AT2G28260,AT2G29940…
GO:0032950	regulation of beta-glucan metabolic process	Pre-symbiosis (24 hour)	0.411	0.411	2	AT3G08550,AT4G04920
GO:0032951	regulation of beta-glucan biosynthetic process	Pre-symbiosis (24 hour)	0.411	0.411	2	AT3G08550,AT4G04920
GO:0090332	stomatal closure	Pre-symbiosis (24 hour)	0.42	0.42	2	AT3G05030,AT5G13750
GO:0003824	catalytic activity	Pre-symbiosis (24 hour)	0.425	0.425	291	AT1G02420,AT1G02850,AT1G02970,AT1G03110,AT1G04120,AT1G05910,AT1G07960,AT1G09300,AT1G09700,AT1G10280,AT1G11190,AT1G11290,AT1G12700,AT1G12740,AT1G15080,AT1G15520,AT1G15950,AT1G16110,AT1G16120,AT1G16130,AT1G16160,AT1G16260,AT1G16350,AT1G17020,AT1G17110,AT1G17170,AT1G18390,AT1G18640,AT1G20060,AT1G21270,AT1G22360,AT1G22380,AT1G23450,AT1G25390,AT1G27440,AT1G27880,AT1G31170,AT1G31190,AT1G31970,AT1G32340…
GO:0051704	multi-organism process	Physical Contact (24 hour)	0.431	0.431	64	AT1G01580,AT1G15330,AT1G17615,AT1G31930,AT1G32400,AT1G43700,AT1G50030,AT1G60420,AT1G77320,AT1G79670,AT1G79680,AT2G02180,AT2G03070,AT2G04450,AT2G05940,AT2G06050,AT2G07020,AT2G17520,AT2G22370,AT2G23150,AT2G26490,AT2G26560,AT2G34930,AT2G39200,AT2G39210,AT2G40140,AT2G40360,AT2G43710,AT2G45220,AT2G47260,AT3G01280,AT3G11650,AT3G11820,AT3G17700,AT3G22640,AT3G48990,AT3G50930,AT3G51430,AT3G60240,AT4G05200…
GO:0044092	negative regulation of molecular function	Pre-symbiosis (24 hour)	0.445	0.445	6	AT1G47710,AT2G23380,AT2G32710,AT4G05590,AT4G26840,AT5G48820
GO:0015772	oligosaccharide transport	Physical Contact (24 hour)	0.446	0.446	3	AT2G02860,AT4G32770,AT5G23660
GO:0015766	disaccharide transport	Physical Contact (24 hour)	0.446	0.446	3	AT2G02860,AT4G32770,AT5G23660
GO:0030641	regulation of cellular pH	Pre-symbiosis (24 hour)	0.448	0.448	2	AT2G46560,AT3G05030
GO:0051453	regulation of intracellular pH	Pre-symbiosis (24 hour)	0.448	0.448	2	AT2G46560,AT3G05030
GO:0010119	regulation of stomatal movement	Physical Contact (24 hour)	0.454	0.454	9	AT1G69530,AT2G26650,AT3G11820,AT3G15730,AT4G14480,AT4G35790,AT5G13750,AT5G52440,AT5G55630
GO:0051234	establishment of localization	Pre-symbiosis (24 hour)	0.462	0.462	93	AT1G01490,AT1G04120,AT1G09070,AT1G12940,AT1G15520,AT1G21170,AT1G25530,AT1G26170,AT1G29420,AT1G29450,AT1G31260,AT1G44750,AT1G47670,AT1G51160,AT1G52360,AT1G54710,AT1G54730,AT1G55910,AT1G65730,AT1G73190,AT1G73700,AT1G74240,AT1G75500,AT1G77380,AT2G13620,AT2G19950,AT2G21600,AT2G26570,AT2G29100,AT2G29120,AT2G29530,AT2G29940,AT2G30710,AT2G31500,AT2G34360,AT2G37170,AT2G37280,AT2G39130,AT2G41620,AT2G41705…
GO:0043291	RAVE complex	Pre-symbiosis (24 hour)	0.469	0.469	1	AT2G46560
GO:0006950	response to stress	Physical Contact (24 hour)	0.474	0.474	120	AT1G03220,AT1G08030,AT1G11530,AT1G12280,AT1G17280,AT1G17615,AT1G17950,AT1G18390,AT1G32583,AT1G43700,AT1G45000,AT1G50030,AT1G52690,AT1G53210,AT1G56450,AT1G56600,AT1G59960,AT1G66980,AT1G67280,AT1G77180,AT1G77320,AT1G79680,AT1G80410,AT2G02860,AT2G03070,AT2G05940,AT2G06050,AT2G17520,AT2G22370,AT2G23150,AT2G26150,AT2G26560,AT2G26650,AT2G34930,AT2G36270,AT2G38710,AT2G39200,AT2G39210,AT2G39550,AT2G40140…
GO:0046873	metal ion transmembrane transporter activity	Pre-symbiosis (24 hour)	0.488	0.488	3	AT3G05030,AT4G37270,AT5G13750
GO:0009809	lignin biosynthetic process	Pre-symbiosis (24 hour)	0.497	0.497	4	AT1G15950,AT1G61820,AT1G72680,AT4G01070
GO:0055080	cation homeostasis	Pre-symbiosis (24 hour)	0.497	0.497	5	AT1G04120,AT2G46560,AT3G05030,AT4G37270,AT5G02600
GO:0016137	glycoside metabolic process	Physical Contact (24 hour)	0.508	0.508	1	AT5G10300
GO:0098588	bounding membrane of organelle	Pre-symbiosis (24 hour)	0.51	0.51	11	AT1G01650,AT1G04120,AT1G53210,AT1G71696,AT2G19950,AT2G38670,AT3G05030,AT3G48820,AT3G50930,AT5G13750,AT5G62810
GO:0030688	preribosome, small subunit precursor	Pre-symbiosis (24 hour)	0.517	0.517	2	AT1G42440,AT1G69070
GO:0009892	negative regulation of metabolic process	Pre-symbiosis (24 hour)	0.52	0.52	30	AT1G05910,AT1G06920,AT1G08370,AT1G09700,AT1G14790,AT1G33240,AT1G47710,AT1G47720,AT1G50410,AT2G22090,AT2G22370,AT2G27040,AT2G30470,AT2G32710,AT2G39740,AT3G07750,AT3G13300,AT3G49250,AT3G59280,AT4G04020,AT4G22140,AT4G31270,AT4G35580,AT4G36990,AT5G04290,AT5G14620,AT5G21160,AT5G48820,AT5G58130,AT5G63320
GO:0052541	plant-type cell wall cellulose metabolic process	Pre-symbiosis (24 hour)	0.527	0.527	2	AT3G08550,AT4G04920
GO:0048586	regulation of long-day photoperiodism, flowering	Pre-symbiosis (24 hour)	0.529	0.529	4	AT1G22770,AT3G07650,AT4G04920,AT4G22140
GO:0005741	mitochondrial outer membrane	Pre-symbiosis (24 hour)	0.529	0.529	2	AT2G38670,AT3G50930
GO:1901363	heterocyclic compound binding	Pre-symbiosis (24 hour)	0.543	0.543	82	AT1G02420,AT1G08320,AT1G08370,AT1G09290,AT1G11290,AT1G12220,AT1G12800,AT1G13450,AT1G16260,AT1G21320,AT1G30490,AT1G33240,AT1G42440,AT1G47720,AT1G48650,AT1G75540,AT1G76010,AT1G76460,AT1G77170,AT2G13600,AT2G17690,AT2G22090,AT2G23380,AT2G23460,AT2G27040,AT2G29190,AT2G34710,AT2G36240,AT2G37170,AT2G41720,AT2G45660,AT3G03340,AT3G04070,AT3G05740,AT3G13300,AT3G13570,AT3G15010,AT3G16810,AT3G18990,AT3G20770…
GO:0043412	macromolecule modification	Pre-symbiosis (24 hour)	0.548	0.548	99	AT1G02420,AT1G03110,AT1G05910,AT1G09290,AT1G11290,AT1G12700,AT1G16130,AT1G16260,AT1G17110,AT1G23450,AT1G32340,AT1G50410,AT1G61390,AT1G61550,AT1G63130,AT1G63500,AT1G67580,AT1G68460,AT1G72710,AT1G75230,AT1G77170,AT1G80150,AT2G04660,AT2G05940,AT2G13600,AT2G17520,AT2G19130,AT2G20650,AT2G22370,AT2G22530,AT2G23380,AT2G27040,AT2G28250,AT2G28940,AT2G31500,AT2G32710,AT2G33540,AT2G36240,AT2G39550,AT2G40120…
GO:0043130	ubiquitin binding	Pre-symbiosis (24 hour)	0.556	0.556	3	AT2G41160,AT3G56740,AT4G36860
GO:0016772	transferase activity, transferring phosphorus-containing groups	Physical Contact (24 hour)	0.578	0.578	45	AT1G07870,AT1G16110,AT1G16130,AT1G18390,AT1G18890,AT1G24030,AT1G25390,AT1G34300,AT1G50030,AT1G52540,AT1G53420,AT1G55810,AT1G60800,AT1G61390,AT1G79670,AT1G79680,AT2G05940,AT2G14750,AT2G17220,AT2G46500,AT3G13690,AT3G13940,AT3G21070,AT3G48260,AT4G02010,AT4G03390,AT4G05200,AT4G08480,AT4G11530,AT4G14480,AT4G21380,AT4G21710,AT4G23180,AT4G23220,AT4G27290,AT4G28880,AT4G32300,AT5G13280,AT5G24080,AT5G35750…
GO:0051260	protein homooligomerization	Pre-symbiosis (24 hour)	0.579	0.579	5	AT1G21460,AT4G14570,AT5G23660,AT5G55630,AT5G58220
GO:0034765	regulation of ion transmembrane transport	Pre-symbiosis (24 hour)	0.585	0.585	5	AT2G31500,AT4G05590,AT4G33950,AT5G20480,AT5G62000
GO:0010605	negative regulation of macromolecule metabolic process	Pre-symbiosis (24 hour)	0.59	0.59	28	AT1G05910,AT1G06920,AT1G08370,AT1G09700,AT1G14790,AT1G33240,AT1G47710,AT1G47720,AT1G50410,AT2G22090,AT2G22370,AT2G27040,AT2G30470,AT2G32710,AT2G39740,AT3G07750,AT3G13300,AT3G49250,AT4G22140,AT4G31270,AT4G35580,AT4G36990,AT5G04290,AT5G14620,AT5G21160,AT5G48820,AT5G58130,AT5G63320
GO:0019725	cellular homeostasis	Pre-symbiosis (24 hour)	0.596	0.596	5	AT1G04120,AT2G46560,AT3G05030,AT4G37270,AT5G02600
GO:0097159	organic cyclic compound binding	Pre-symbiosis (24 hour)	0.597	0.597	82	AT1G02420,AT1G08320,AT1G08370,AT1G09290,AT1G11290,AT1G12220,AT1G12800,AT1G13450,AT1G16260,AT1G21320,AT1G30490,AT1G33240,AT1G42440,AT1G47720,AT1G48650,AT1G75540,AT1G76010,AT1G76460,AT1G77170,AT2G13600,AT2G17690,AT2G22090,AT2G23380,AT2G23460,AT2G27040,AT2G29190,AT2G34710,AT2G36240,AT2G37170,AT2G41720,AT2G45660,AT3G03340,AT3G04070,AT3G05740,AT3G13300,AT3G13570,AT3G15010,AT3G16810,AT3G18990,AT3G20770…
GO:0072509	divalent inorganic cation transmembrane transporter activity	Pre-symbiosis (24 hour)	0.604	0.604	11	AT1G31260,AT1G53210,AT1G55910,AT2G29100,AT2G29120,AT3G21180,AT3G63380,AT4G03560,AT4G35290,AT4G37270,AT5G48400
GO:0005654	nucleoplasm	Pre-symbiosis (24 hour)	0.608	0.608	25	AT1G09700,AT1G22770,AT1G32750,AT2G18220,AT2G22370,AT2G27040,AT2G33540,AT3G12380,AT3G13570,AT3G18990,AT3G20740,AT3G27100,AT3G54610,AT3G55460,AT4G04920,AT4G22140,AT4G31270,AT5G04290,AT5G09850,AT5G14620,AT5G16690,AT5G43130,AT5G49530,AT5G58003,AT5G67240
GO:0034085	establishment of sister chromatid cohesion	Pre-symbiosis (24 hour)	0.61	0.61	2	AT1G11060,AT4G31400
GO:0007166	cell surface receptor signaling pathway	Physical Contact (24 hour)	0.618	0.618	15	AT1G07870,AT1G16110,AT1G16130,AT1G18390,AT1G24030,AT1G25390,AT1G52540,AT1G60800,AT1G79670,AT1G79680,AT2G05940,AT2G17220,AT3G13690,AT4G02010,AT4G03390
GO:0035198	miRNA binding	Pre-symbiosis (24 hour)	0.621	0.621	3	AT1G09700,AT2G27040,AT4G30080
GO:0031966	mitochondrial membrane	Pre-symbiosis (24 hour)	0.625	0.625	4	AT1G74240,AT2G38670,AT3G50930,AT3G51870
GO:0019222	regulation of metabolic process	Pre-symbiosis (24 hour)	0.626	0.626	66	AT1G05910,AT1G06920,AT1G08370,AT1G13450,AT1G14790,AT1G22770,AT1G32340,AT1G33240,AT1G47710,AT1G47720,AT1G67080,AT1G69040,AT1G75500,AT1G75540,AT2G17520,AT2G22090,AT2G23380,AT2G27040,AT2G32710,AT2G33540,AT2G41370,AT2G45660,AT3G04070,AT3G07650,AT3G08550,AT3G13300,AT3G16810,AT3G20770,AT3G24490,AT3G27100,AT3G47450,AT3G54610,AT3G57670,AT3G59280,AT3G59470,AT3G63340,AT4G03560,AT4G04020,AT4G04920,AT4G17880…
GO:0016773	phosphotransferase activity, alcohol group as acceptor	Pre-symbiosis (24 hour)	0.626	0.626	53	AT1G02970,AT1G16110,AT1G16120,AT1G16130,AT1G16160,AT1G16260,AT1G18390,AT1G21270,AT1G25390,AT1G52310,AT1G61390,AT1G61550,AT1G63500,AT1G67580,AT1G69730,AT1G72710,AT1G79670,AT1G79680,AT1G80460,AT2G05940,AT2G19130,AT2G26980,AT2G28250,AT2G28940,AT2G31500,AT2G33560,AT2G40120,AT3G03900,AT3G24550,AT3G57120,AT3G63340,AT4G03390,AT4G05200,AT4G11460,AT4G11530,AT4G16130,AT4G21380,AT4G23160,AT4G23180,AT4G23220…
GO:0015085	calcium ion transmembrane transporter activity	Pre-symbiosis (24 hour)	0.643	0.643	8	AT1G53210,AT2G29100,AT2G29120,AT3G21180,AT3G63380,AT4G03560,AT4G35290,AT5G48400
GO:0098771	inorganic ion homeostasis	Pre-symbiosis (24 hour)	0.65	0.65	5	AT1G04120,AT2G46560,AT3G05030,AT4G37270,AT5G02600
GO:0033240	positive regulation of cellular amine metabolic process	Pre-symbiosis (24 hour)	0.65	0.65	2	AT1G75500,AT3G04070
GO:0045764	positive regulation of cellular amino acid metabolic process	Pre-symbiosis (24 hour)	0.65	0.65	2	AT1G75500,AT3G04070
GO:0006402	mRNA catabolic process	Physical Contact (24 hour)	0.661	0.661	9	AT1G03360,AT1G07705,AT1G31500,AT1G76630,AT2G19560,AT2G22090,AT3G46210,AT4G27650,AT5G07350
GO:0044260	cellular macromolecule metabolic process	Pre-symbiosis (24 hour)	0.662	0.662	141	AT1G02420,AT1G03110,AT1G05910,AT1G06920,AT1G08370,AT1G09290,AT1G10520,AT1G11290,AT1G12800,AT1G13450,AT1G14790,AT1G16260,AT1G17110,AT1G21320,AT1G22770,AT1G27440,AT1G32340,AT1G33240,AT1G42440,AT1G47710,AT1G47720,AT1G48650,AT1G61390,AT1G61550,AT1G69070,AT1G72710,AT1G75540,AT1G77170,AT2G05940,AT2G13600,AT2G17520,AT2G17690,AT2G19130,AT2G20650,AT2G22090,AT2G22530,AT2G23380,AT2G27040,AT2G28940,AT2G29210…
GO:1904062	regulation of cation transmembrane transport	Pre-symbiosis (24 hour)	0.674	0.674	3	AT2G31500,AT4G05590,AT5G62000
GO:0071229	cellular response to acid chemical	Pre-symbiosis (24 hour)	0.681	0.681	32	AT1G04120,AT1G12940,AT1G18390,AT1G27880,AT1G33240,AT1G62810,AT1G68360,AT1G79460,AT2G26040,AT2G26980,AT2G29100,AT2G29120,AT2G31500,AT2G33540,AT2G39550,AT2G41370,AT2G43710,AT3G05740,AT3G07360,AT3G17980,AT3G23240,AT3G50930,AT3G51550,AT4G02570,AT4G04920,AT4G33950,AT4G35290,AT5G13170,AT5G44120,AT5G47010,AT5G48400,AT5G66880
GO:0010268	brassinosteroid homeostasis	Physical Contact (24 hour)	0.687	0.687	4	AT2G42850,AT4G36380,AT5G05690,AT5G36110
GO:0032182	ubiquitin-like protein binding	Pre-symbiosis (24 hour)	0.696	0.696	3	AT2G41160,AT3G56740,AT4G36860
GO:0016723	oxidoreductase activity, oxidizing metal ions, NAD or NADP as acceptor	Physical Contact (24 hour)	0.712	0.712	3	AT1G01580,AT5G49730,AT5G49740
GO:0000293	ferric-chelate reductase activity	Physical Contact (24 hour)	0.712	0.712	3	AT1G01580,AT5G49730,AT5G49740
GO:0002831	regulation of response to biotic stimulus	Pre-symbiosis (24 hour)	0.727	0.727	9	AT2G22370,AT3G17980,AT3G59280,AT4G04920,AT4G13040,AT4G19040,AT4G35580,AT5G14930,AT5G62570
GO:0043900	regulation of multi-organism process	Pre-symbiosis (24 hour)	0.732	0.732	12	AT1G18750,AT2G22370,AT2G31500,AT3G07160,AT3G17980,AT3G59280,AT4G04920,AT4G13040,AT4G19040,AT4G35580,AT5G14930,AT5G62570
GO:0048508	embryonic meristem development	Pre-symbiosis (24 hour)	0.76	0.76	5	AT1G30490,AT2G34710,AT3G13300,AT5G27030,AT5G62940
GO:0015633	zinc-transporting ATPase activity	Pre-symbiosis (24 hour)	0.762	0.762	1	AT4G37270
GO:0098805	whole membrane	Pre-symbiosis (24 hour)	0.768	0.768	5	AT1G71696,AT2G38670,AT3G05030,AT3G50930,AT5G13750
GO:0046113	nucleobase catabolic process	Pre-symbiosis (24 hour)	0.775	0.775	3	AT4G34900,AT5G12200,AT5G64370
GO:0005740	mitochondrial envelope	Pre-symbiosis (24 hour)	0.787	0.787	4	AT1G74240,AT2G38670,AT3G50930,AT3G51870
GO:0048571	long-day photoperiodism	Pre-symbiosis (24 hour)	0.801	0.801	6	AT1G22770,AT1G67580,AT3G07650,AT4G04920,AT4G22140,AT5G47010
GO:0030705	cytoskeleton-dependent intracellular transport	Pre-symbiosis (24 hour)	0.808	0.808	3	AT3G19990,AT5G20110,AT5G20610
GO:0010118	stomatal movement	Pre-symbiosis (24 hour)	0.818	0.818	3	AT1G04120,AT3G05030,AT5G13750
GO:0045144	meiotic sister chromatid segregation	Pre-symbiosis (24 hour)	0.846	0.846	3	AT1G11060,AT2G33560,AT4G31400
GO:0051177	meiotic sister chromatid cohesion	Pre-symbiosis (24 hour)	0.846	0.846	3	AT1G11060,AT2G33560,AT4G31400
GO:0009987	cellular process	Physical Contact (24 hour)	0.857	0.857	311	AT1G01490,AT1G02170,AT1G03360,AT1G03670,AT1G03790,AT1G03840,AT1G04200,AT1G04760,AT1G05910,AT1G06260,AT1G07705,AT1G07870,AT1G08030,AT1G08620,AT1G10200,AT1G10270,AT1G10840,AT1G11530,AT1G12280,AT1G12700,AT1G16110,AT1G16130,AT1G17280,AT1G17950,AT1G18390,AT1G18890,AT1G20060,AT1G20696,AT1G21460,AT1G22620,AT1G23450,AT1G24030,AT1G25360,AT1G25390,AT1G31500,AT1G31930,AT1G32070,AT1G32240,AT1G32580,AT1G34300…
GO:0009414	response to water deprivation	Physical Contact (24 hour)	0.86	0.86	23	AT1G17950,AT1G18390,AT1G52690,AT1G56600,AT1G80410,AT2G26650,AT2G36270,AT2G39550,AT3G05500,AT3G05740,AT3G12490,AT3G52450,AT3G63060,AT4G24960,AT4G39130,AT5G06760,AT5G11270,AT5G13750,AT5G24090,AT5G35750,AT5G40390,AT5G50720,AT5G52440
GO:0071695	anatomical structure maturation	Physical Contact (24 hour)	0.885	0.885	6	AT2G24260,AT2G26650,AT2G40170,AT4G00730,AT4G38630,AT5G44120
GO:0043170	macromolecule metabolic process	Pre-symbiosis (24 hour)	0.887	0.887	157	AT1G02420,AT1G03110,AT1G05910,AT1G06920,AT1G08370,AT1G09290,AT1G10520,AT1G11290,AT1G12800,AT1G13450,AT1G14790,AT1G16130,AT1G16260,AT1G17110,AT1G21320,AT1G22770,AT1G27440,AT1G32340,AT1G33240,AT1G42440,AT1G47710,AT1G47720,AT1G48650,AT1G50410,AT1G61390,AT1G61550,AT1G69070,AT1G71696,AT1G72710,AT1G75540,AT1G77170,AT2G04660,AT2G05940,AT2G13600,AT2G17520,AT2G17690,AT2G19130,AT2G20650,AT2G22090,AT2G22530…
GO:0009725	response to hormone	Pre-symbiosis (24 hour)	0.9	0.9	77	AT1G04120,AT1G09700,AT1G12420,AT1G15520,AT1G16350,AT1G18390,AT1G50420,AT1G62810,AT1G63500,AT1G68360,AT1G69040,AT1G75500,AT1G79460,AT1G80080,AT2G14580,AT2G22370,AT2G26040,AT2G26980,AT2G30470,AT2G31500,AT2G33540,AT2G37170,AT2G38280,AT2G39550,AT2G41370,AT2G43710,AT2G45200,AT2G45660,AT2G47260,AT3G07360,AT3G08550,AT3G12380,AT3G13300,AT3G17980,AT3G20770,AT3G23240,AT3G26040,AT3G28580,AT3G51420,AT3G51550…
GO:0016740	transferase activity	Physical Contact (24 hour)	0.926	0.926	110	AT1G07870,AT1G08030,AT1G16110,AT1G16130,AT1G17280,AT1G18390,AT1G18890,AT1G22360,AT1G22400,AT1G24030,AT1G25390,AT1G32070,AT1G34300,AT1G50030,AT1G52540,AT1G53025,AT1G53420,AT1G54570,AT1G55810,AT1G55850,AT1G60800,AT1G61390,AT1G61620,AT1G67856,AT1G76400,AT1G79670,AT1G79680,AT1G80410,AT2G01480,AT2G03220,AT2G05940,AT2G13360,AT2G14750,AT2G17220,AT2G19070,AT2G19130,AT2G22250,AT2G29420,AT2G30150,AT2G30920…
GO:0002253	activation of immune response	Pre-symbiosis (24 hour)	0.931	0.931	4	AT2G41370,AT3G18165,AT3G25040,AT5G13160
GO:0002218	activation of innate immune response	Pre-symbiosis (24 hour)	0.931	0.931	4	AT2G41370,AT3G18165,AT3G25040,AT5G13160
GO:0046337	phosphatidylethanolamine metabolic process	Pre-symbiosis (24 hour)	0.938	0.938	1	AT2G38670
GO:0006646	phosphatidylethanolamine biosynthetic process	Pre-symbiosis (24 hour)	0.938	0.938	1	AT2G38670
GO:0004306	ethanolamine-phosphate cytidylyltransferase activity	Pre-symbiosis (24 hour)	0.938	0.938	1	AT2G38670
GO:0010962	regulation of glucan biosynthetic process	Pre-symbiosis (24 hour)	0.961	0.961	2	AT3G08550,AT4G04920
GO:0032501	multicellular organismal process	Pre-symbiosis (24 hour)	0.971	0.971	111	AT1G06230,AT1G08320,AT1G09700,AT1G11060,AT1G11190,AT1G12740,AT1G17020,AT1G17110,AT1G18390,AT1G18640,AT1G18750,AT1G22770,AT1G23380,AT1G29420,AT1G30490,AT1G33240,AT1G56180,AT1G65570,AT1G67580,AT1G68480,AT1G75540,AT1G77320,AT2G04660,AT2G07020,AT2G22370,AT2G23380,AT2G31500,AT2G34710,AT2G37860,AT2G38280,AT2G41370,AT2G41720,AT2G42160,AT2G42850,AT2G43900,AT2G45660,AT3G04070,AT3G06350,AT3G07160,AT3G07650…
GO:0034762	regulation of transmembrane transport	Pre-symbiosis (24 hour)	0.993	0.993	5	AT2G31500,AT4G05590,AT4G33950,AT5G20480,AT5G62000
GO:0008150	biological_process	Pre-symbiosis (24 hour)	1	1	283	AT1G02420,AT1G02850,AT1G03370,AT1G04120,AT1G06920,AT1G07040,AT1G07960,AT1G08320,AT1G08370,AT1G09070,AT1G09290,AT1G10520,AT1G11060,AT1G11290,AT1G12290,AT1G12420,AT1G12800,AT1G12940,AT1G13450,AT1G14790,AT1G15950,AT1G16350,AT1G17020,AT1G18390,AT1G18750,AT1G20060,AT1G21460,AT1G22610,AT1G22850,AT1G23380,AT1G26170,AT1G29170,AT1G31170,AT1G31190,AT1G31260,AT1G33240,AT1G33540,AT1G34630,AT1G42440,AT1G42990…
GO:0032502	developmental process	Pre-symbiosis (24 hour)	1	1	137	AT1G06230,AT1G08320,AT1G09700,AT1G11060,AT1G11190,AT1G12740,AT1G17020,AT1G17110,AT1G18390,AT1G18640,AT1G18750,AT1G21270,AT1G22770,AT1G23380,AT1G29420,AT1G29450,AT1G30490,AT1G33240,AT1G56180,AT1G65570,AT1G66170,AT1G67580,AT1G68320,AT1G68360,AT1G68480,AT1G69500,AT1G72710,AT1G75500,AT1G75540,AT1G80350,AT2G04660,AT2G07020,AT2G22370,AT2G23380,AT2G28250,AT2G31500,AT2G34710,AT2G37860,AT2G38280,AT2G41370…
GO:0043934	sporulation	Pre-symbiosis (24 hour)	1	1	1	AT3G07160
GO:0021700	developmental maturation	Pre-symbiosis (24 hour)	1	1	6	AT1G18750,AT5G13170,AT5G23660,AT5G40010,AT5G41950,AT5G44120
GO:0098727	maintenance of cell number	Pre-symbiosis (24 hour)	1	1	2	AT2G45660,AT3G08550
GO:0048856	anatomical structure development	Pre-symbiosis (24 hour)	1	1	119	AT1G06230,AT1G08320,AT1G09700,AT1G11060,AT1G11190,AT1G12740,AT1G17020,AT1G17110,AT1G18390,AT1G18640,AT1G18750,AT1G21270,AT1G22770,AT1G23380,AT1G30490,AT1G33240,AT1G56180,AT1G65570,AT1G67580,AT1G68360,AT1G68480,AT1G72710,AT1G75500,AT1G75540,AT1G80350,AT2G04660,AT2G07020,AT2G22370,AT2G23380,AT2G28250,AT2G31500,AT2G34710,AT2G37860,AT2G38280,AT2G41370,AT2G41720,AT2G42160,AT2G42610,AT2G42850,AT2G45660…
GO:0071695	anatomical structure maturation	Pre-symbiosis (24 hour)	1	1	5	AT5G13170,AT5G23660,AT5G40010,AT5G41950,AT5G44120
GO:0009888	tissue development	Pre-symbiosis (24 hour)	1	1	10	AT1G23380,AT1G33240,AT1G80350,AT2G41370,AT3G08550,AT3G13300,AT5G24740,AT5G27030,AT5G40330,AT5G51590
GO:0090558	plant epidermis development	Pre-symbiosis (24 hour)	1	1	1	AT1G33240
GO:0010087	phloem or xylem histogenesis	Pre-symbiosis (24 hour)	1	1	6	AT2G28250,AT3G01680,AT4G02570,AT5G10250,AT5G51590,AT5G62940
GO:0010089	xylem development	Pre-symbiosis (24 hour)	1	1	1	AT5G51590
GO:0010088	phloem development	Pre-symbiosis (24 hour)	1	1	1	AT3G01680
GO:0048507	meristem development	Pre-symbiosis (24 hour)	1	1	8	AT1G23380,AT2G41370,AT2G45660,AT3G08550,AT3G12380,AT3G13300,AT5G24740,AT5G27030
GO:0007568	aging	Pre-symbiosis (24 hour)	1	1	10	AT1G11190,AT1G17020,AT3G15010,AT4G19040,AT4G35890,AT5G13170,AT5G14930,AT5G35630,AT5G62000,AT5G62620
GO:0009653	anatomical structure morphogenesis	Pre-symbiosis (24 hour)	1	1	12	AT1G33240,AT1G80350,AT2G41370,AT3G08550,AT3G13300,AT3G48820,AT3G57670,AT4G33200,AT5G02600,AT5G24740,AT5G27030,AT5G40330
GO:0048532	anatomical structure arrangement	Pre-symbiosis (24 hour)	1	1	2	AT3G13300,AT5G27030
GO:0009933	meristem structural organization	Pre-symbiosis (24 hour)	1	1	2	AT3G13300,AT5G27030
GO:0048646	anatomical structure formation involved in morphogenesis	Pre-symbiosis (24 hour)	1	1	9	AT1G68480,AT1G69500,AT2G41370,AT3G18830,AT3G20860,AT4G13510,AT4G32810,AT4G34850,AT5G20730
GO:1905393	plant organ formation	Pre-symbiosis (24 hour)	1	1	7	AT1G68480,AT2G41370,AT3G18830,AT3G20860,AT4G13510,AT4G32810,AT5G20730
GO:0090698	post-embryonic plant morphogenesis	Pre-symbiosis (24 hour)	1	1	9	AT1G68480,AT2G04160,AT2G41370,AT2G42610,AT3G18830,AT3G20860,AT4G13510,AT5G10250,AT5G20730
GO:0090626	plant epidermis morphogenesis	Pre-symbiosis (24 hour)	1	1	3	AT1G33240,AT1G80350,AT5G40330
GO:0010014	meristem initiation	Pre-symbiosis (24 hour)	1	1	4	AT1G30490,AT2G34710,AT3G13300,AT5G27030
GO:0090421	embryonic meristem initiation	Pre-symbiosis (24 hour)	1	1	4	AT1G30490,AT2G34710,AT3G13300,AT5G27030
GO:0002252	immune effector process	Pre-symbiosis (24 hour)	1	1	3	AT2G27040,AT2G41370,AT5G14930
GO:0022406	membrane docking	Pre-symbiosis (24 hour)	1	1	3	AT1G21170,AT3G24350,AT5G46860
GO:0006928	movement of cell or subcellular component	Pre-symbiosis (24 hour)	1	1	6	AT1G20060,AT3G19960,AT3G19990,AT4G33200,AT5G20110,AT5G20610
GO:0061919	process utilizing autophagic mechanism	Pre-symbiosis (24 hour)	1	1	1	AT1G73190
GO:0071554	cell wall organization or biogenesis	Pre-symbiosis (24 hour)	1	1	24	AT1G06920,AT1G27440,AT1G68560,AT1G75500,AT1G80350,AT2G20650,AT2G38080,AT2G40320,AT3G07160,AT3G08550,AT4G04920,AT4G23100,AT4G28370,AT4G28500,AT4G33870,AT5G04885,AT5G15630,AT5G15900,AT5G19390,AT5G41040,AT5G44070,AT5G54690,AT5G62620,AT5G66460
GO:0071669	plant-type cell wall organization or biogenesis	Pre-symbiosis (24 hour)	1	1	10	AT1G06920,AT1G27440,AT1G75500,AT1G80350,AT2G20650,AT2G38080,AT3G08550,AT4G04920,AT4G28370,AT5G15630
GO:0007049	cell cycle	Pre-symbiosis (24 hour)	1	1	25	AT1G02970,AT1G06230,AT1G11060,AT1G33240,AT1G66170,AT1G67580,AT1G77320,AT2G32710,AT2G33560,AT3G07160,AT3G13170,AT3G19050,AT3G22880,AT3G27730,AT3G43610,AT3G48160,AT3G48860,AT4G31400,AT4G38600,AT5G02110,AT5G11040,AT5G16690,AT5G19390,AT5G22000,AT5G48820
GO:0022402	cell cycle process	Pre-symbiosis (24 hour)	1	1	19	AT1G02970,AT1G11060,AT1G33240,AT1G66170,AT1G77320,AT2G33560,AT3G07160,AT3G13170,AT3G19050,AT3G22880,AT3G27730,AT3G43610,AT3G48160,AT3G48860,AT4G31400,AT4G38600,AT5G11040,AT5G16690,AT5G19390
GO:0044770	cell cycle phase transition	Pre-symbiosis (24 hour)	1	1	1	AT2G33560
GO:0000278	mitotic cell cycle	Pre-symbiosis (24 hour)	1	1	11	AT1G06230,AT1G11060,AT1G67580,AT2G33560,AT3G07160,AT3G19050,AT3G43610,AT3G48860,AT4G31400,AT5G11040,AT5G19390
GO:1903047	mitotic cell cycle process	Pre-symbiosis (24 hour)	1	1	9	AT1G11060,AT2G33560,AT3G07160,AT3G19050,AT3G43610,AT3G48860,AT4G31400,AT5G11040,AT5G19390
GO:0044772	mitotic cell cycle phase transition	Pre-symbiosis (24 hour)	1	1	1	AT2G33560
GO:0007059	chromosome segregation	Pre-symbiosis (24 hour)	1	1	7	AT1G11060,AT1G66170,AT2G33560,AT3G13170,AT3G22880,AT3G27730,AT4G31400
GO:0098813	nuclear chromosome segregation	Pre-symbiosis (24 hour)	1	1	7	AT1G11060,AT1G66170,AT2G33560,AT3G13170,AT3G22880,AT3G27730,AT4G31400
GO:0051304	chromosome separation	Pre-symbiosis (24 hour)	1	1	1	AT2G33560
GO:1990069	stomatal opening	Pre-symbiosis (24 hour)	1	1	2	AT4G22790,AT4G33950
GO:0006457	protein folding	Pre-symbiosis (24 hour)	1	1	1	AT1G07960
GO:0061077	chaperone-mediated protein folding	Pre-symbiosis (24 hour)	1	1	1	AT5G18820
GO:0006458	'de novo' protein folding	Pre-symbiosis (24 hour)	1	1	1	AT5G18820
GO:0048869	cellular developmental process	Pre-symbiosis (24 hour)	1	1	7	AT1G33240,AT1G80350,AT3G08550,AT3G48820,AT3G57670,AT4G33200,AT5G40330
GO:0030154	cell differentiation	Pre-symbiosis (24 hour)	1	1	3	AT1G33240,AT3G08550,AT3G48820
GO:0048468	cell development	Pre-symbiosis (24 hour)	1	1	5	AT1G33240,AT1G80350,AT3G48820,AT3G57670,AT5G40330
GO:0048469	cell maturation	Pre-symbiosis (24 hour)	1	1	1	AT5G41950
GO:0090627	plant epidermal cell differentiation	Pre-symbiosis (24 hour)	1	1	1	AT5G40330
GO:0010026	trichome differentiation	Pre-symbiosis (24 hour)	1	1	3	AT1G33240,AT1G80350,AT5G40330
GO:0045165	cell fate commitment	Pre-symbiosis (24 hour)	1	1	1	AT3G57670
GO:0001709	cell fate determination	Pre-symbiosis (24 hour)	1	1	2	AT3G12680,AT3G57670
GO:0001708	cell fate specification	Pre-symbiosis (24 hour)	1	1	1	AT1G68480
GO:0010158	abaxial cell fate specification	Pre-symbiosis (24 hour)	1	1	1	AT1G68480
GO:0007017	microtubule-based process	Pre-symbiosis (24 hour)	1	1	5	AT1G20060,AT1G80350,AT3G19990,AT3G43610,AT5G20110
GO:0007018	microtubule-based movement	Pre-symbiosis (24 hour)	1	1	1	AT1G20060
GO:0008219	cell death	Pre-symbiosis (24 hour)	1	1	3	AT3G14470,AT3G15010,AT3G50930
GO:0012501	programmed cell death	Pre-symbiosis (24 hour)	1	1	6	AT1G12220,AT3G14470,AT3G50930,AT5G02190,AT5G20480,AT5G50260
GO:0034050	host programmed cell death induced by symbiont	Pre-symbiosis (24 hour)	1	1	2	AT3G14470,AT3G50930
GO:0010623	programmed cell death involved in cell development	Pre-symbiosis (24 hour)	1	1	1	AT5G50260
GO:0051301	cell division	Pre-symbiosis (24 hour)	1	1	6	AT1G80080,AT3G19050,AT3G48860,AT4G30080,AT5G11040,AT5G19390
GO:0008356	asymmetric cell division	Pre-symbiosis (24 hour)	1	1	1	AT1G80080
GO:0000910	cytokinesis	Pre-symbiosis (24 hour)	1	1	4	AT3G19050,AT3G48860,AT5G11040,AT5G19390
GO:0061640	cytoskeleton-dependent cytokinesis	Pre-symbiosis (24 hour)	1	1	4	AT3G19050,AT3G48860,AT5G11040,AT5G19390
GO:0000281	mitotic cytokinesis	Pre-symbiosis (24 hour)	1	1	4	AT3G19050,AT3G48860,AT5G11040,AT5G19390
GO:0032506	cytokinetic process	Pre-symbiosis (24 hour)	1	1	4	AT3G19050,AT3G48860,AT5G11040,AT5G19390
GO:1902410	mitotic cytokinetic process	Pre-symbiosis (24 hour)	1	1	4	AT3G19050,AT3G48860,AT5G11040,AT5G19390
GO:0000911	cytokinesis by cell plate formation	Pre-symbiosis (24 hour)	1	1	4	AT3G19050,AT3G48860,AT5G11040,AT5G19390
GO:0034337	RNA folding	Pre-symbiosis (24 hour)	1	1	1	AT1G12800
GO:0007163	establishment or maintenance of cell polarity	Pre-symbiosis (24 hour)	1	1	1	AT4G33200
GO:0030029	actin filament-based process	Pre-symbiosis (24 hour)	1	1	5	AT1G29170,AT3G12380,AT3G19960,AT4G33200,AT5G20610
GO:0030048	actin filament-based movement	Pre-symbiosis (24 hour)	1	1	3	AT3G19960,AT4G33200,AT5G20610
GO:0008283	cell proliferation	Pre-symbiosis (24 hour)	1	1	1	AT1G17110
GO:0042440	pigment metabolic process	Pre-symbiosis (24 hour)	1	1	4	AT1G63970,AT4G17880,AT4G22920,AT5G04900
GO:0046148	pigment biosynthetic process	Pre-symbiosis (24 hour)	1	1	2	AT1G63970,AT4G17880
GO:0046149	pigment catabolic process	Pre-symbiosis (24 hour)	1	1	2	AT4G22920,AT5G04900
GO:0044281	small molecule metabolic process	Pre-symbiosis (24 hour)	1	1	41	AT1G03110,AT1G16350,AT1G31190,AT1G67080,AT1G69040,AT1G75500,AT1G79460,AT1G79680,AT1G80460,AT2G03667,AT2G46580,AT3G04070,AT3G06350,AT3G06860,AT3G11470,AT3G20390,AT3G47340,AT3G47450,AT4G03560,AT4G10490,AT4G23100,AT4G34900,AT4G36400,AT4G37320,AT4G37330,AT4G37340,AT4G37870,AT4G39280,AT5G12200,AT5G32470,AT5G35630,AT5G42650,AT5G44070,AT5G47680,AT5G51830,AT5G53970,AT5G54680,AT5G58220,AT5G58560,AT5G61760…
GO:0006766	vitamin metabolic process	Pre-symbiosis (24 hour)	1	1	3	AT2G46580,AT5G32470,AT5G53970
GO:0006775	fat-soluble vitamin metabolic process	Pre-symbiosis (24 hour)	1	1	1	AT5G53970
GO:0006767	water-soluble vitamin metabolic process	Pre-symbiosis (24 hour)	1	1	2	AT2G46580,AT5G32470
GO:0070085	glycosylation	Pre-symbiosis (24 hour)	1	1	3	AT2G47760,AT3G48820,AT5G03080
GO:0044283	small molecule biosynthetic process	Pre-symbiosis (24 hour)	1	1	14	AT1G67080,AT1G79460,AT2G03667,AT2G46580,AT3G06350,AT3G11470,AT3G20390,AT3G47340,AT4G03560,AT4G37870,AT5G32470,AT5G42650,AT5G53970,AT5G61760
GO:2001057	reactive nitrogen species metabolic process	Pre-symbiosis (24 hour)	1	1	2	AT1G62810,AT3G47450
GO:0032259	methylation	Pre-symbiosis (24 hour)	1	1	9	AT1G50410,AT2G22370,AT2G23380,AT2G27040,AT3G17310,AT3G49250,AT3G52210,AT5G04290,AT5G14620
GO:0070988	demethylation	Pre-symbiosis (24 hour)	1	1	3	AT1G05910,AT4G31270,AT5G58130
GO:0019748	secondary metabolic process	Pre-symbiosis (24 hour)	1	1	30	AT1G15950,AT1G17170,AT1G33540,AT1G61820,AT1G64940,AT1G68320,AT1G68360,AT1G72680,AT1G74590,AT2G38080,AT3G09270,AT3G25420,AT3G26330,AT3G48280,AT3G52970,AT3G53260,AT4G01070,AT4G12300,AT4G23100,AT4G31940,AT4G34850,AT4G37320,AT4G37330,AT4G37340,AT4G38540,AT4G39330,AT5G41040,AT5G44070,AT5G54680,AT5G66690
GO:0044550	secondary metabolite biosynthetic process	Pre-symbiosis (24 hour)	1	1	16	AT1G15950,AT1G61820,AT1G72680,AT2G38080,AT3G26330,AT3G48280,AT3G52970,AT4G01070,AT4G12300,AT4G23100,AT4G31940,AT4G34850,AT4G37320,AT4G37330,AT4G37340,AT5G44070
GO:0009056	catabolic process	Pre-symbiosis (24 hour)	1	1	44	AT1G08370,AT1G27980,AT1G31190,AT1G32340,AT1G53920,AT1G74590,AT1G80460,AT2G04660,AT2G20650,AT2G22090,AT2G40930,AT2G41370,AT3G06860,AT3G07750,AT3G09270,AT3G13300,AT3G14250,AT3G17180,AT3G23920,AT3G45010,AT3G47340,AT3G49340,AT4G01070,AT4G02570,AT4G10490,AT4G19810,AT4G22920,AT4G28370,AT4G32810,AT4G34900,AT5G02190,AT5G04900,AT5G12200,AT5G17600,AT5G21160,AT5G22000,AT5G22850,AT5G43280,AT5G44070,AT5G45290…
GO:0044282	small molecule catabolic process	Pre-symbiosis (24 hour)	1	1	5	AT1G31190,AT1G80460,AT3G47340,AT4G10490,AT5G53970
GO:0090487	secondary metabolite catabolic process	Pre-symbiosis (24 hour)	1	1	1	AT1G74590
GO:1901615	organic hydroxy compound metabolic process	Pre-symbiosis (24 hour)	1	1	10	AT1G12740,AT1G31190,AT1G67080,AT1G80460,AT2G46580,AT3G06350,AT4G10490,AT5G42650,AT5G53970,AT5G61760
GO:0006066	alcohol metabolic process	Pre-symbiosis (24 hour)	1	1	4	AT1G31190,AT1G67080,AT1G80460,AT5G61760
GO:1902644	tertiary alcohol metabolic process	Pre-symbiosis (24 hour)	1	1	1	AT1G67080
GO:0034308	primary alcohol metabolic process	Pre-symbiosis (24 hour)	1	1	1	AT5G58560
GO:0019751	polyol metabolic process	Pre-symbiosis (24 hour)	1	1	3	AT1G31190,AT1G80460,AT5G61760
GO:0098732	macromolecule deacylation	Pre-symbiosis (24 hour)	1	1	1	AT3G10390
GO:0043413	macromolecule glycosylation	Pre-symbiosis (24 hour)	1	1	3	AT2G47760,AT3G48820,AT5G03080
GO:0097503	sialylation	Pre-symbiosis (24 hour)	1	1	1	AT3G48820
GO:1900673	olefin metabolic process	Pre-symbiosis (24 hour)	1	1	2	AT3G04070,AT3G15010
GO:1901568	fatty acid derivative metabolic process	Pre-symbiosis (24 hour)	1	1	2	AT1G14790,AT5G42650
GO:0010166	wax metabolic process	Pre-symbiosis (24 hour)	1	1	1	AT1G14790
GO:1901575	organic substance catabolic process	Pre-symbiosis (24 hour)	1	1	41	AT1G08370,AT1G27980,AT1G31190,AT1G32340,AT1G53920,AT1G80460,AT2G04660,AT2G20650,AT2G22090,AT2G40930,AT2G41370,AT3G06860,AT3G07750,AT3G13300,AT3G14250,AT3G17180,AT3G23920,AT3G45010,AT3G47340,AT3G49340,AT4G02570,AT4G10490,AT4G19810,AT4G22920,AT4G28370,AT4G32810,AT4G34900,AT5G02190,AT5G04900,AT5G12200,AT5G17600,AT5G21160,AT5G22000,AT5G22850,AT5G43280,AT5G44070,AT5G45290,AT5G50260,AT5G53970,AT5G56280…
GO:0009057	macromolecule catabolic process	Pre-symbiosis (24 hour)	1	1	26	AT1G08370,AT1G32340,AT2G04660,AT2G20650,AT2G22090,AT2G40930,AT2G41370,AT3G07750,AT3G13300,AT3G14250,AT3G17180,AT3G23920,AT3G45010,AT3G49340,AT4G02570,AT4G19810,AT4G28370,AT5G02190,AT5G04900,AT5G17600,AT5G21160,AT5G22000,AT5G22850,AT5G45290,AT5G50260,AT5G56280
GO:1901616	organic hydroxy compound catabolic process	Pre-symbiosis (24 hour)	1	1	3	AT1G31190,AT1G80460,AT4G10490
GO:0046164	alcohol catabolic process	Pre-symbiosis (24 hour)	1	1	2	AT1G31190,AT1G80460
GO:0046174	polyol catabolic process	Pre-symbiosis (24 hour)	1	1	2	AT1G31190,AT1G80460
GO:0030638	polyketide metabolic process	Pre-symbiosis (24 hour)	1	1	1	AT4G34850
GO:1901576	organic substance biosynthetic process	Pre-symbiosis (24 hour)	1	1	58	AT1G13450,AT1G14790,AT1G15950,AT1G16350,AT1G33240,AT1G61820,AT1G63970,AT1G67080,AT1G72680,AT1G75540,AT1G79680,AT1G80460,AT2G03667,AT2G22530,AT2G38670,AT2G45660,AT2G47760,AT3G04070,AT3G06350,AT3G07650,AT3G08550,AT3G15010,AT3G16810,AT3G20390,AT3G20770,AT3G24490,AT3G27100,AT3G47340,AT3G47450,AT3G48820,AT3G54610,AT3G57670,AT3G58560,AT4G01070,AT4G04920,AT4G17880,AT4G22140,AT4G23100,AT4G23980,AT4G26060…
GO:0009059	macromolecule biosynthetic process	Pre-symbiosis (24 hour)	1	1	34	AT1G13450,AT1G33240,AT1G75540,AT2G22530,AT2G45660,AT2G47760,AT3G07650,AT3G08550,AT3G16810,AT3G20770,AT3G24490,AT3G27100,AT3G48820,AT3G54610,AT3G57670,AT3G58560,AT4G04920,AT4G17880,AT4G22140,AT4G23980,AT4G26060,AT4G26840,AT4G31270,AT4G36990,AT5G09460,AT5G27030,AT5G28040,AT5G39785,AT5G40330,AT5G53180,AT5G54680,AT5G58003,AT5G61760,AT5G63840
GO:1901617	organic hydroxy compound biosynthetic process	Pre-symbiosis (24 hour)	1	1	5	AT1G12740,AT1G67080,AT2G46580,AT5G53970,AT5G61760
GO:0046165	alcohol biosynthetic process	Pre-symbiosis (24 hour)	1	1	2	AT1G67080,AT5G61760
GO:1902645	tertiary alcohol biosynthetic process	Pre-symbiosis (24 hour)	1	1	1	AT1G67080
GO:0046173	polyol biosynthetic process	Pre-symbiosis (24 hour)	1	1	1	AT5G61760
GO:1900674	olefin biosynthetic process	Pre-symbiosis (24 hour)	1	1	2	AT3G04070,AT3G15010
GO:1901570	fatty acid derivative biosynthetic process	Pre-symbiosis (24 hour)	1	1	1	AT1G14790
GO:0010025	wax biosynthetic process	Pre-symbiosis (24 hour)	1	1	1	AT1G14790
GO:1901362	organic cyclic compound biosynthetic process	Pre-symbiosis (24 hour)	1	1	25	AT1G16350,AT1G33240,AT1G61820,AT1G63970,AT1G72680,AT1G79680,AT3G07650,AT3G20770,AT3G24490,AT3G54610,AT3G57670,AT4G01070,AT4G04920,AT4G17880,AT4G23980,AT4G31270,AT4G35160,AT4G36990,AT5G09460,AT5G27030,AT5G40330,AT5G53970,AT5G54680,AT5G58003,AT5G61760
GO:0030639	polyketide biosynthetic process	Pre-symbiosis (24 hour)	1	1	1	AT4G34850
GO:1901564	organonitrogen compound metabolic process	Pre-symbiosis (24 hour)	1	1	100	AT1G03110,AT1G16130,AT1G16260,AT1G16350,AT1G17110,AT1G27980,AT1G32340,AT1G47710,AT1G50170,AT1G61390,AT1G61550,AT1G63970,AT1G69040,AT1G71696,AT1G72710,AT1G74590,AT1G75500,AT1G79680,AT2G03667,AT2G04660,AT2G05940,AT2G17520,AT2G19130,AT2G20650,AT2G22530,AT2G23380,AT2G27040,AT2G28940,AT2G31440,AT2G32710,AT2G33540,AT2G39740,AT2G40120,AT2G40930,AT2G41370,AT2G46580,AT2G47760,AT3G04070,AT3G04340,AT3G06060…
GO:1901565	organonitrogen compound catabolic process	Pre-symbiosis (24 hour)	1	1	28	AT1G27980,AT1G32340,AT2G04660,AT2G20650,AT2G40930,AT2G41370,AT3G14250,AT3G17180,AT3G45010,AT3G47340,AT3G49340,AT4G02570,AT4G19810,AT4G22920,AT4G28370,AT4G34900,AT5G02190,AT5G04900,AT5G12200,AT5G17600,AT5G22000,AT5G22850,AT5G44070,AT5G45290,AT5G50260,AT5G53970,AT5G56280,AT5G64370
GO:1901566	organonitrogen compound biosynthetic process	Pre-symbiosis (24 hour)	1	1	1	AT4G35160
GO:0042398	cellular modified amino acid biosynthetic process	Pre-symbiosis (24 hour)	1	1	1	AT4G23100
GO:0009308	amine metabolic process	Pre-symbiosis (24 hour)	1	1	4	AT1G69040,AT1G75500,AT3G04070,AT5G14420
GO:0019538	protein metabolic process	Pre-symbiosis (24 hour)	1	1	68	AT1G16130,AT1G16260,AT1G17110,AT1G32340,AT1G47710,AT1G61390,AT1G61550,AT1G71696,AT1G72710,AT2G04660,AT2G05940,AT2G17520,AT2G19130,AT2G20650,AT2G22530,AT2G23380,AT2G27040,AT2G28940,AT2G31440,AT2G32710,AT2G33540,AT2G39740,AT2G40120,AT2G40930,AT2G41370,AT2G47760,AT3G04340,AT3G09970,AT3G10390,AT3G11470,AT3G16810,AT3G17180,AT3G27100,AT3G47450,AT3G48820,AT3G49340,AT3G54610,AT3G63340,AT4G02570,AT4G03390…
GO:0042157	lipoprotein metabolic process	Pre-symbiosis (24 hour)	1	1	1	AT2G22530
GO:0036211	protein modification process	Pre-symbiosis (24 hour)	1	1	42	AT1G16260,AT1G17110,AT1G32340,AT1G61390,AT1G61550,AT1G72710,AT2G05940,AT2G17520,AT2G19130,AT2G20650,AT2G22530,AT2G23380,AT2G27040,AT2G28940,AT2G32710,AT2G33540,AT2G40120,AT2G41370,AT2G47760,AT3G09970,AT3G10390,AT3G11470,AT3G27100,AT3G48820,AT3G54610,AT3G63340,AT4G02570,AT4G05200,AT4G11460,AT4G21380,AT4G22140,AT4G23180,AT4G26840,AT4G28370,AT4G33080,AT5G03080,AT5G13160,AT5G14620,AT5G22000,AT5G48820…
GO:0006508	proteolysis	Pre-symbiosis (24 hour)	1	1	24	AT1G17110,AT1G32340,AT1G47710,AT1G71696,AT2G04660,AT2G20650,AT2G31440,AT2G40930,AT2G41370,AT3G04340,AT3G17180,AT3G27100,AT3G49340,AT4G02570,AT4G14570,AT4G28370,AT5G17600,AT5G22000,AT5G22850,AT5G22860,AT5G27430,AT5G45290,AT5G50260,AT5G56280
GO:0051604	protein maturation	Pre-symbiosis (24 hour)	1	1	1	AT1G71696
GO:0016485	protein processing	Pre-symbiosis (24 hour)	1	1	1	AT1G71696
GO:0030163	protein catabolic process	Pre-symbiosis (24 hour)	1	1	19	AT1G32340,AT2G04660,AT2G20650,AT2G40930,AT2G41370,AT3G14250,AT3G17180,AT3G45010,AT3G49340,AT4G02570,AT4G28370,AT5G02190,AT5G04900,AT5G17600,AT5G22000,AT5G22850,AT5G45290,AT5G50260,AT5G56280
GO:0009812	flavonoid metabolic process	Pre-symbiosis (24 hour)	1	1	2	AT4G17880,AT5G08640
GO:0046283	anthocyanin-containing compound metabolic process	Pre-symbiosis (24 hour)	1	1	1	AT4G17880
GO:0009813	flavonoid biosynthetic process	Pre-symbiosis (24 hour)	1	1	2	AT4G17880,AT5G08640
GO:0009718	anthocyanin-containing compound biosynthetic process	Pre-symbiosis (24 hour)	1	1	1	AT4G17880
GO:1901135	carbohydrate derivative metabolic process	Pre-symbiosis (24 hour)	1	1	14	AT1G02850,AT1G16350,AT1G61820,AT1G79680,AT1G80460,AT2G22530,AT2G47760,AT3G47450,AT3G48820,AT4G23100,AT4G37320,AT4G37340,AT5G47680,AT5G54680
GO:0006040	amino sugar metabolic process	Pre-symbiosis (24 hour)	1	1	1	AT4G19810
GO:1901071	glucosamine-containing compound metabolic process	Pre-symbiosis (24 hour)	1	1	1	AT4G19810
GO:1901136	carbohydrate derivative catabolic process	Pre-symbiosis (24 hour)	1	1	2	AT4G19810,AT5G44070
GO:0046348	amino sugar catabolic process	Pre-symbiosis (24 hour)	1	1	1	AT4G19810
GO:1901072	glucosamine-containing compound catabolic process	Pre-symbiosis (24 hour)	1	1	1	AT4G19810
GO:0006022	aminoglycan metabolic process	Pre-symbiosis (24 hour)	1	1	1	AT4G19810
GO:0006030	chitin metabolic process	Pre-symbiosis (24 hour)	1	1	1	AT4G19810
GO:0006026	aminoglycan catabolic process	Pre-symbiosis (24 hour)	1	1	1	AT4G19810
GO:0006032	chitin catabolic process	Pre-symbiosis (24 hour)	1	1	1	AT4G19810
GO:1901657	glycosyl compound metabolic process	Pre-symbiosis (24 hour)	1	1	15	AT1G02850,AT1G03110,AT1G16350,AT1G61820,AT1G68360,AT2G44480,AT3G26410,AT4G23100,AT4G37320,AT4G37330,AT4G37340,AT5G36890,AT5G44070,AT5G47680,AT5G54680
GO:1901658	glycosyl compound catabolic process	Pre-symbiosis (24 hour)	1	1	1	AT5G44070
GO:1901137	carbohydrate derivative biosynthetic process	Pre-symbiosis (24 hour)	1	1	7	AT1G16350,AT1G79680,AT1G80460,AT2G22530,AT2G47760,AT3G48820,AT4G23100
GO:1901659	glycosyl compound biosynthetic process	Pre-symbiosis (24 hour)	1	1	2	AT1G16350,AT4G23100
GO:0006629	lipid metabolic process	Pre-symbiosis (24 hour)	1	1	30	AT1G12740,AT1G27980,AT1G53920,AT1G63970,AT1G67080,AT1G68320,AT1G79460,AT1G80460,AT2G22530,AT2G36800,AT2G38670,AT2G42850,AT2G43710,AT3G06060,AT3G06860,AT3G15690,AT3G47450,AT3G54950,AT3G58830,AT4G03560,AT4G13050,AT4G15440,AT4G32810,AT4G33950,AT5G03080,AT5G23960,AT5G42650,AT5G43280,AT5G51830,AT5G58560
GO:1903509	liposaccharide metabolic process	Pre-symbiosis (24 hour)	1	1	1	AT2G22530
GO:0008202	steroid metabolic process	Pre-symbiosis (24 hour)	1	1	5	AT1G12740,AT2G36800,AT2G42850,AT4G15440,AT5G42650
GO:0016128	phytosteroid metabolic process	Pre-symbiosis (24 hour)	1	1	3	AT1G12740,AT2G36800,AT2G42850
GO:0016125	sterol metabolic process	Pre-symbiosis (24 hour)	1	1	4	AT1G12740,AT2G42850,AT4G15440,AT5G42650
GO:0008610	lipid biosynthetic process	Pre-symbiosis (24 hour)	1	1	20	AT1G12740,AT1G63970,AT1G67080,AT1G68320,AT1G79460,AT2G22530,AT2G38670,AT2G42850,AT2G43710,AT3G06060,AT3G15690,AT3G47450,AT3G58830,AT4G03560,AT4G13050,AT4G32810,AT4G33950,AT5G03080,AT5G23960,AT5G51830
GO:0006694	steroid biosynthetic process	Pre-symbiosis (24 hour)	1	1	2	AT1G12740,AT2G42850
GO:0016129	phytosteroid biosynthetic process	Pre-symbiosis (24 hour)	1	1	2	AT1G12740,AT2G42850
GO:0016042	lipid catabolic process	Pre-symbiosis (24 hour)	1	1	5	AT1G27980,AT1G53920,AT3G06860,AT4G32810,AT5G43280
GO:0005975	carbohydrate metabolic process	Pre-symbiosis (24 hour)	1	1	11	AT1G31190,AT1G61820,AT1G80460,AT3G08550,AT3G20440,AT3G47450,AT3G48820,AT3G58560,AT4G04920,AT4G37870,AT5G63840
GO:0016052	carbohydrate catabolic process	Pre-symbiosis (24 hour)	1	1	5	AT1G68560,AT1G80460,AT3G23920,AT5G04885,AT5G66460
GO:0009311	oligosaccharide metabolic process	Pre-symbiosis (24 hour)	1	1	5	AT1G21270,AT3G48820,AT3G58560,AT4G33950,AT5G51460
GO:0005996	monosaccharide metabolic process	Pre-symbiosis (24 hour)	1	1	1	AT4G37870
GO:0019318	hexose metabolic process	Pre-symbiosis (24 hour)	1	1	1	AT4G37870
GO:0006006	glucose metabolic process	Pre-symbiosis (24 hour)	1	1	1	AT4G37870
GO:0005976	polysaccharide metabolic process	Pre-symbiosis (24 hour)	1	1	13	AT1G27440,AT1G68560,AT2G40320,AT3G08550,AT3G23920,AT3G58560,AT4G04920,AT4G28370,AT5G04885,AT5G41040,AT5G54690,AT5G63840,AT5G66460
GO:0044042	glucan metabolic process	Pre-symbiosis (24 hour)	1	1	4	AT3G08550,AT3G58560,AT4G04920,AT5G63840
GO:0010393	galacturonan metabolic process	Pre-symbiosis (24 hour)	1	1	1	AT4G04920
GO:0045488	pectin metabolic process	Pre-symbiosis (24 hour)	1	1	1	AT4G04920
GO:0000272	polysaccharide catabolic process	Pre-symbiosis (24 hour)	1	1	4	AT1G68560,AT3G23920,AT5G04885,AT5G66460
GO:0009251	glucan catabolic process	Pre-symbiosis (24 hour)	1	1	2	AT3G23920,AT5G04885
GO:0016051	carbohydrate biosynthetic process	Pre-symbiosis (24 hour)	1	1	9	AT1G27440,AT3G08550,AT3G58560,AT4G04920,AT4G37870,AT5G51460,AT5G51830,AT5G54690,AT5G63840
GO:0009312	oligosaccharide biosynthetic process	Pre-symbiosis (24 hour)	1	1	2	AT3G58560,AT5G51460
GO:0046364	monosaccharide biosynthetic process	Pre-symbiosis (24 hour)	1	1	1	AT4G37870
GO:0019319	hexose biosynthetic process	Pre-symbiosis (24 hour)	1	1	1	AT4G37870
GO:0006094	gluconeogenesis	Pre-symbiosis (24 hour)	1	1	1	AT4G37870
GO:0000271	polysaccharide biosynthetic process	Pre-symbiosis (24 hour)	1	1	4	AT3G08550,AT3G58560,AT4G04920,AT5G63840
GO:0045489	pectin biosynthetic process	Pre-symbiosis (24 hour)	1	1	1	AT5G41040
GO:0055114	oxidation-reduction process	Pre-symbiosis (24 hour)	1	1	7	AT2G37770,AT3G06860,AT4G04020,AT4G33520,AT4G36400,AT5G17770,ATMG01360
GO:0043094	cellular metabolic compound salvage	Pre-symbiosis (24 hour)	1	1	3	AT2G46580,AT3G10160,AT4G36400
GO:0009853	photorespiration	Pre-symbiosis (24 hour)	1	1	2	AT3G10160,AT4G36400
GO:1901334	lactone metabolic process	Pre-symbiosis (24 hour)	1	1	1	AT4G32810
GO:0042360	vitamin E metabolic process	Pre-symbiosis (24 hour)	1	1	1	AT5G53970
GO:0010191	mucilage metabolic process	Pre-symbiosis (24 hour)	1	1	2	AT4G28370,AT5G62620
GO:0048363	mucilage pectin metabolic process	Pre-symbiosis (24 hour)	1	1	1	AT4G28370
GO:0051186	cofactor metabolic process	Pre-symbiosis (24 hour)	1	1	4	AT1G63970,AT2G46580,AT4G22920,AT5G04900
GO:0006732	coenzyme metabolic process	Pre-symbiosis (24 hour)	1	1	1	AT2G46580
GO:0006733	oxidoreduction coenzyme metabolic process	Pre-symbiosis (24 hour)	1	1	1	AT5G55810
GO:0097354	prenylation	Pre-symbiosis (24 hour)	1	1	1	AT2G39550
GO:0043603	cellular amide metabolic process	Pre-symbiosis (24 hour)	1	1	3	AT1G71696,AT1G74590,AT4G35160
GO:0000255	allantoin metabolic process	Pre-symbiosis (24 hour)	1	1	1	AT5G58220
GO:0006518	peptide metabolic process	Pre-symbiosis (24 hour)	1	1	2	AT1G71696,AT1G74590
GO:0046937	phytochelatin metabolic process	Pre-symbiosis (24 hour)	1	1	1	AT5G44070
GO:0044106	cellular amine metabolic process	Pre-symbiosis (24 hour)	1	1	3	AT1G69040,AT1G75500,AT3G04070
GO:0006576	cellular biogenic amine metabolic process	Pre-symbiosis (24 hour)	1	1	1	AT1G75500
GO:0072527	pyrimidine-containing compound metabolic process	Pre-symbiosis (24 hour)	1	1	3	AT5G12200,AT5G32470,AT5G64370
GO:0072524	pyridine-containing compound metabolic process	Pre-symbiosis (24 hour)	1	1	1	AT2G46580
GO:0042816	vitamin B6 metabolic process	Pre-symbiosis (24 hour)	1	1	1	AT2G46580
GO:0043449	cellular alkene metabolic process	Pre-symbiosis (24 hour)	1	1	2	AT3G04070,AT3G15010
GO:0009692	ethylene metabolic process	Pre-symbiosis (24 hour)	1	1	2	AT3G04070,AT3G15010
GO:0009404	toxin metabolic process	Pre-symbiosis (24 hour)	1	1	1	AT1G74590
GO:0052314	phytoalexin metabolic process	Pre-symbiosis (24 hour)	1	1	1	AT4G23100
GO:0006575	cellular modified amino acid metabolic process	Pre-symbiosis (24 hour)	1	1	1	AT1G74590
GO:0044248	cellular catabolic process	Pre-symbiosis (24 hour)	1	1	39	AT1G08370,AT1G27980,AT1G32340,AT1G74590,AT1G80460,AT2G04660,AT2G20650,AT2G22090,AT2G40930,AT2G41370,AT3G06860,AT3G07750,AT3G09270,AT3G13300,AT3G14250,AT3G17180,AT3G23920,AT3G45010,AT3G47340,AT3G49340,AT4G01070,AT4G02570,AT4G10490,AT4G22920,AT4G28370,AT4G32810,AT4G34900,AT5G04900,AT5G12200,AT5G17600,AT5G21160,AT5G22000,AT5G43280,AT5G44070,AT5G45290,AT5G50260,AT5G53970,AT5G56280,AT5G64370
GO:0051187	cofactor catabolic process	Pre-symbiosis (24 hour)	1	1	2	AT4G22920,AT5G04900
GO:0046700	heterocycle catabolic process	Pre-symbiosis (24 hour)	1	1	10	AT1G08370,AT2G22090,AT3G13300,AT4G22920,AT4G34900,AT5G04900,AT5G12200,AT5G21160,AT5G44070,AT5G64370
GO:0044270	cellular nitrogen compound catabolic process	Pre-symbiosis (24 hour)	1	1	10	AT1G08370,AT2G22090,AT3G13300,AT4G22920,AT4G34900,AT5G04900,AT5G12200,AT5G21160,AT5G44070,AT5G64370
GO:0072529	pyrimidine-containing compound catabolic process	Pre-symbiosis (24 hour)	1	1	2	AT5G12200,AT5G64370
GO:0006914	autophagy	Pre-symbiosis (24 hour)	1	1	1	AT1G73190
GO:0044267	cellular protein metabolic process	Pre-symbiosis (24 hour)	1	1	51	AT1G16260,AT1G17110,AT1G32340,AT1G47710,AT1G61390,AT1G61550,AT1G72710,AT2G05940,AT2G17520,AT2G19130,AT2G22530,AT2G23380,AT2G27040,AT2G28940,AT2G32710,AT2G33540,AT2G40930,AT2G41370,AT2G47760,AT3G09970,AT3G10390,AT3G11470,AT3G16810,AT3G27100,AT3G48820,AT3G49340,AT3G54610,AT3G63340,AT4G02570,AT4G05200,AT4G11460,AT4G21380,AT4G22140,AT4G23180,AT4G26060,AT4G26840,AT4G39280,AT5G03080,AT5G04900,AT5G13160…
GO:0006464	cellular protein modification process	Pre-symbiosis (24 hour)	1	1	42	AT1G16260,AT1G17110,AT1G32340,AT1G61390,AT1G61550,AT1G72710,AT2G05940,AT2G17520,AT2G19130,AT2G20650,AT2G22530,AT2G23380,AT2G27040,AT2G28940,AT2G32710,AT2G33540,AT2G40120,AT2G41370,AT2G47760,AT3G09970,AT3G10390,AT3G11470,AT3G27100,AT3G48820,AT3G54610,AT3G63340,AT4G02570,AT4G05200,AT4G11460,AT4G21380,AT4G22140,AT4G23180,AT4G26840,AT4G28370,AT4G33080,AT5G03080,AT5G13160,AT5G14620,AT5G22000,AT5G48820…
GO:0018193	peptidyl-amino acid modification	Pre-symbiosis (24 hour)	1	1	8	AT1G72710,AT2G27040,AT3G48820,AT3G54610,AT4G22140,AT4G26840,AT4G33080,AT5G14620
GO:0018196	peptidyl-asparagine modification	Pre-symbiosis (24 hour)	1	1	1	AT3G48820
GO:0018205	peptidyl-lysine modification	Pre-symbiosis (24 hour)	1	1	5	AT2G27040,AT3G54610,AT4G22140,AT4G26840,AT5G14620
GO:0018209	peptidyl-serine modification	Pre-symbiosis (24 hour)	1	1	2	AT1G72710,AT4G33080
GO:0018208	peptidyl-proline modification	Pre-symbiosis (24 hour)	1	1	1	AT5G62620
GO:0008213	protein alkylation	Pre-symbiosis (24 hour)	1	1	5	AT2G22370,AT2G23380,AT2G27040,AT3G20740,AT5G14620
GO:0070647	protein modification by small protein conjugation or removal	Pre-symbiosis (24 hour)	1	1	12	AT1G17110,AT1G32340,AT2G04660,AT2G20650,AT2G41370,AT3G14250,AT3G27100,AT4G02570,AT4G26840,AT4G28370,AT5G22000,AT5G56280
GO:0032446	protein modification by small protein conjugation	Pre-symbiosis (24 hour)	1	1	9	AT1G32340,AT2G04660,AT2G20650,AT2G41370,AT3G14250,AT4G02570,AT4G26840,AT4G28370,AT5G22000
GO:0016567	protein ubiquitination	Pre-symbiosis (24 hour)	1	1	8	AT1G32340,AT2G04660,AT2G20650,AT2G41370,AT3G14250,AT4G02570,AT4G28370,AT5G22000
GO:0000209	protein polyubiquitination	Pre-symbiosis (24 hour)	1	1	5	AT1G32340,AT2G20650,AT3G14250,AT4G28370,AT5G22000
GO:0016925	protein sumoylation	Pre-symbiosis (24 hour)	1	1	1	AT4G26840
GO:0070646	protein modification by small protein removal	Pre-symbiosis (24 hour)	1	1	3	AT1G17110,AT3G27100,AT5G56280
GO:0000338	protein deneddylation	Pre-symbiosis (24 hour)	1	1	1	AT5G56280
GO:0016579	protein deubiquitination	Pre-symbiosis (24 hour)	1	1	2	AT1G17110,AT3G27100
GO:0043543	protein acylation	Pre-symbiosis (24 hour)	1	1	2	AT3G54610,AT4G22140
GO:0006473	protein acetylation	Pre-symbiosis (24 hour)	1	1	2	AT3G54610,AT4G22140
GO:0018394	peptidyl-lysine acetylation	Pre-symbiosis (24 hour)	1	1	2	AT3G54610,AT4G22140
GO:0006475	internal protein amino acid acetylation	Pre-symbiosis (24 hour)	1	1	2	AT3G54610,AT4G22140
GO:0018393	internal peptidyl-lysine acetylation	Pre-symbiosis (24 hour)	1	1	2	AT3G54610,AT4G22140
GO:0035601	protein deacylation	Pre-symbiosis (24 hour)	1	1	1	AT3G10390
GO:0006476	protein deacetylation	Pre-symbiosis (24 hour)	1	1	1	AT3G10390
GO:0018215	protein phosphopantetheinylation	Pre-symbiosis (24 hour)	1	1	1	AT3G11470
GO:0018342	protein prenylation	Pre-symbiosis (24 hour)	1	1	1	AT2G39550
GO:0018344	protein geranylgeranylation	Pre-symbiosis (24 hour)	1	1	1	AT2G39550
GO:0006465	signal peptide processing	Pre-symbiosis (24 hour)	1	1	1	AT5G27430
GO:0044036	cell wall macromolecule metabolic process	Pre-symbiosis (24 hour)	1	1	10	AT1G27440,AT1G68560,AT2G40320,AT3G08550,AT4G04920,AT5G04885,AT5G41040,AT5G54690,AT5G62620,AT5G66460
GO:0010383	cell wall polysaccharide metabolic process	Pre-symbiosis (24 hour)	1	1	8	AT1G27440,AT1G68560,AT2G40320,AT3G08550,AT4G04920,AT5G04885,AT5G41040,AT5G54690
GO:0010410	hemicellulose metabolic process	Pre-symbiosis (24 hour)	1	1	5	AT1G27440,AT1G68560,AT2G40320,AT5G04885,AT5G54690
GO:0045491	xylan metabolic process	Pre-symbiosis (24 hour)	1	1	4	AT1G27440,AT1G68560,AT2G40320,AT5G54690
GO:0010413	glucuronoxylan metabolic process	Pre-symbiosis (24 hour)	1	1	2	AT1G27440,AT5G54690
GO:1990937	xylan acetylation	Pre-symbiosis (24 hour)	1	1	1	AT2G40320
GO:0045493	xylan catabolic process	Pre-symbiosis (24 hour)	1	1	1	AT1G68560
GO:0016998	cell wall macromolecule catabolic process	Pre-symbiosis (24 hour)	1	1	1	AT5G66460
GO:0009100	glycoprotein metabolic process	Pre-symbiosis (24 hour)	1	1	1	AT3G48820
GO:0006029	proteoglycan metabolic process	Pre-symbiosis (24 hour)	1	1	1	AT5G62620
GO:0010384	cell wall proteoglycan metabolic process	Pre-symbiosis (24 hour)	1	1	1	AT5G62620
GO:0010404	cell wall hydroxyproline-rich glycoprotein metabolic process	Pre-symbiosis (24 hour)	1	1	1	AT5G62620
GO:0010405	arabinogalactan protein metabolic process	Pre-symbiosis (24 hour)	1	1	1	AT5G62620
GO:0043414	macromolecule methylation	Pre-symbiosis (24 hour)	1	1	11	AT1G50410,AT2G22370,AT2G23380,AT2G27040,AT3G17310,AT3G20740,AT3G49250,AT3G52210,AT5G04290,AT5G04560,AT5G14620
GO:0006479	protein methylation	Pre-symbiosis (24 hour)	1	1	5	AT2G22370,AT2G23380,AT2G27040,AT3G20740,AT5G14620
GO:0018022	peptidyl-lysine methylation	Pre-symbiosis (24 hour)	1	1	3	AT2G22370,AT2G27040,AT5G14620
GO:0018023	peptidyl-lysine trimethylation	Pre-symbiosis (24 hour)	1	1	1	AT2G22370
GO:0044265	cellular macromolecule catabolic process	Pre-symbiosis (24 hour)	1	1	22	AT1G08370,AT1G32340,AT2G04660,AT2G20650,AT2G22090,AT2G40930,AT2G41370,AT3G07750,AT3G13300,AT3G14250,AT3G17180,AT3G45010,AT3G49340,AT4G02570,AT4G28370,AT5G04900,AT5G17600,AT5G21160,AT5G22000,AT5G45290,AT5G50260,AT5G56280
GO:0043632	modification-dependent macromolecule catabolic process	Pre-symbiosis (24 hour)	1	1	2	AT2G41370,AT5G45290
GO:0044257	cellular protein catabolic process	Pre-symbiosis (24 hour)	1	1	17	AT1G32340,AT2G04660,AT2G20650,AT2G40930,AT2G41370,AT3G14250,AT3G17180,AT3G45010,AT3G49340,AT4G02570,AT4G28370,AT5G04900,AT5G17600,AT5G22000,AT5G45290,AT5G50260,AT5G56280
GO:0010304	PSII associated light-harvesting complex II catabolic process	Pre-symbiosis (24 hour)	1	1	1	AT5G04900
GO:0051603	proteolysis involved in cellular protein catabolic process	Pre-symbiosis (24 hour)	1	1	16	AT1G32340,AT2G04660,AT2G20650,AT2G40930,AT2G41370,AT3G14250,AT3G17180,AT3G45010,AT3G49340,AT4G02570,AT4G28370,AT5G17600,AT5G22000,AT5G45290,AT5G50260,AT5G56280
GO:0019941	modification-dependent protein catabolic process	Pre-symbiosis (24 hour)	1	1	2	AT2G41370,AT5G45290
GO:0006511	ubiquitin-dependent protein catabolic process	Pre-symbiosis (24 hour)	1	1	2	AT2G41370,AT5G45290
GO:0042787	protein ubiquitination involved in ubiquitin-dependent protein catabolic process	Pre-symbiosis (24 hour)	1	1	8	AT1G32340,AT2G04660,AT2G20650,AT2G41370,AT3G14250,AT4G02570,AT4G28370,AT5G22000
GO:0010498	proteasomal protein catabolic process	Pre-symbiosis (24 hour)	1	1	2	AT2G41370,AT5G45290
GO:0043161	proteasome-mediated ubiquitin-dependent protein catabolic process	Pre-symbiosis (24 hour)	1	1	2	AT2G41370,AT5G45290
GO:0006082	organic acid metabolic process	Pre-symbiosis (24 hour)	1	1	40	AT1G18640,AT1G67080,AT1G68320,AT1G68360,AT1G69040,AT1G75500,AT1G79460,AT2G03667,AT2G43710,AT3G04070,AT3G06350,AT3G06860,AT3G11470,AT3G15690,AT3G20390,AT3G20860,AT3G23940,AT3G47340,AT3G47450,AT4G03560,AT4G10490,AT4G13040,AT4G13050,AT4G15440,AT4G23100,AT4G33950,AT4G36400,AT4G37320,AT4G37330,AT4G37340,AT4G39280,AT5G07010,AT5G35630,AT5G42650,AT5G43280,AT5G44070,AT5G51830,AT5G53970,AT5G54680,AT5G55810
GO:0043436	oxoacid metabolic process	Pre-symbiosis (24 hour)	1	1	40	AT1G18640,AT1G67080,AT1G68320,AT1G68360,AT1G69040,AT1G75500,AT1G79460,AT2G03667,AT2G43710,AT3G04070,AT3G06350,AT3G06860,AT3G11470,AT3G15690,AT3G20390,AT3G20860,AT3G23940,AT3G47340,AT3G47450,AT4G03560,AT4G10490,AT4G13040,AT4G13050,AT4G15440,AT4G23100,AT4G33950,AT4G36400,AT4G37320,AT4G37330,AT4G37340,AT4G39280,AT5G07010,AT5G35630,AT5G42650,AT5G43280,AT5G44070,AT5G51830,AT5G53970,AT5G54680,AT5G55810
GO:0019752	carboxylic acid metabolic process	Pre-symbiosis (24 hour)	1	1	33	AT1G18640,AT1G67080,AT1G68320,AT1G69040,AT1G75500,AT1G79460,AT2G03667,AT2G43710,AT3G04070,AT3G06350,AT3G06860,AT3G11470,AT3G15690,AT3G20390,AT3G20860,AT3G23940,AT3G47340,AT3G47450,AT4G03560,AT4G10490,AT4G13040,AT4G13050,AT4G15440,AT4G33950,AT4G36400,AT4G39280,AT5G07010,AT5G35630,AT5G42650,AT5G43280,AT5G51830,AT5G53970,AT5G55810
GO:0043648	dicarboxylic acid metabolic process	Pre-symbiosis (24 hour)	1	1	3	AT3G06350,AT5G35630,AT5G55810
GO:0046417	chorismate metabolic process	Pre-symbiosis (24 hour)	1	1	1	AT3G06350
GO:0032787	monocarboxylic acid metabolic process	Pre-symbiosis (24 hour)	1	1	19	AT1G67080,AT2G03667,AT2G43710,AT3G06350,AT3G06860,AT3G15690,AT3G47340,AT3G47450,AT4G03560,AT4G10490,AT4G13040,AT4G13050,AT4G15440,AT4G33950,AT4G36400,AT5G07010,AT5G42650,AT5G43280,AT5G51830
GO:0006089	lactate metabolic process	Pre-symbiosis (24 hour)	1	1	1	AT4G36400
GO:0019516	lactate oxidation	Pre-symbiosis (24 hour)	1	1	1	AT4G36400
GO:0009694	jasmonic acid metabolic process	Pre-symbiosis (24 hour)	1	1	3	AT4G03560,AT5G07010,AT5G42650
GO:0006090	pyruvate metabolic process	Pre-symbiosis (24 hour)	1	1	1	AT3G47450
GO:0019632	shikimate metabolic process	Pre-symbiosis (24 hour)	1	1	1	AT3G06350
GO:0006690	icosanoid metabolic process	Pre-symbiosis (24 hour)	1	1	2	AT4G15440,AT5G42650
GO:0006520	cellular amino acid metabolic process	Pre-symbiosis (24 hour)	1	1	9	AT1G69040,AT1G75500,AT2G03667,AT3G04070,AT3G11470,AT3G20390,AT3G47340,AT4G39280,AT5G53970
GO:1901605	alpha-amino acid metabolic process	Pre-symbiosis (24 hour)	1	1	4	AT1G75500,AT2G03667,AT3G47340,AT5G53970
GO:0009066	aspartate family amino acid metabolic process	Pre-symbiosis (24 hour)	1	1	4	AT2G03667,AT3G11470,AT3G47340,AT5G55810
GO:0006553	lysine metabolic process	Pre-symbiosis (24 hour)	1	1	1	AT3G11470
GO:0006531	aspartate metabolic process	Pre-symbiosis (24 hour)	1	1	1	AT5G55810
GO:0009064	glutamine family amino acid metabolic process	Pre-symbiosis (24 hour)	1	1	1	AT5G35630
GO:0006541	glutamine metabolic process	Pre-symbiosis (24 hour)	1	1	1	AT5G35630
GO:0006536	glutamate metabolic process	Pre-symbiosis (24 hour)	1	1	1	AT5G35630
GO:0009069	serine family amino acid metabolic process	Pre-symbiosis (24 hour)	1	1	1	AT1G18640
GO:0006563	L-serine metabolic process	Pre-symbiosis (24 hour)	1	1	1	AT1G18640
GO:0043038	amino acid activation	Pre-symbiosis (24 hour)	1	1	1	AT4G39280
GO:0009081	branched-chain amino acid metabolic process	Pre-symbiosis (24 hour)	1	1	1	AT3G20390
GO:0016054	organic acid catabolic process	Pre-symbiosis (24 hour)	1	1	5	AT3G06860,AT3G47340,AT4G10490,AT5G43280,AT5G53970
GO:0046395	carboxylic acid catabolic process	Pre-symbiosis (24 hour)	1	1	5	AT3G06860,AT3G47340,AT4G10490,AT5G43280,AT5G53970
GO:0072329	monocarboxylic acid catabolic process	Pre-symbiosis (24 hour)	1	1	3	AT3G06860,AT4G10490,AT5G43280
GO:0009063	cellular amino acid catabolic process	Pre-symbiosis (24 hour)	1	1	2	AT3G47340,AT5G53970
GO:1901606	alpha-amino acid catabolic process	Pre-symbiosis (24 hour)	1	1	1	AT5G53970
GO:0042180	cellular ketone metabolic process	Pre-symbiosis (24 hour)	1	1	5	AT1G69040,AT1G75500,AT3G04070,AT3G47450,AT4G03560
GO:0042537	benzene-containing compound metabolic process	Pre-symbiosis (24 hour)	1	1	3	AT1G17170,AT4G10490,AT4G13040
GO:0072490	toluene-containing compound metabolic process	Pre-symbiosis (24 hour)	1	1	1	AT1G17170
GO:0019326	nitrotoluene metabolic process	Pre-symbiosis (24 hour)	1	1	1	AT1G17170
GO:0018973	trinitrotoluene metabolic process	Pre-symbiosis (24 hour)	1	1	1	AT1G17170
GO:0018974	2,4,6-trinitrotoluene metabolic process	Pre-symbiosis (24 hour)	1	1	1	AT1G17170
GO:0018958	phenol-containing compound metabolic process	Pre-symbiosis (24 hour)	1	1	2	AT4G10490,AT4G13040
GO:0009696	salicylic acid metabolic process	Pre-symbiosis (24 hour)	1	1	2	AT4G10490,AT4G13040
GO:0033013	tetrapyrrole metabolic process	Pre-symbiosis (24 hour)	1	1	3	AT1G63970,AT4G22920,AT5G04900
GO:0006778	porphyrin-containing compound metabolic process	Pre-symbiosis (24 hour)	1	1	3	AT1G63970,AT4G22920,AT5G04900
GO:0042168	heme metabolic process	Pre-symbiosis (24 hour)	1	1	1	AT1G50170
GO:0046156	siroheme metabolic process	Pre-symbiosis (24 hour)	1	1	1	AT1G50170
GO:0015994	chlorophyll metabolic process	Pre-symbiosis (24 hour)	1	1	3	AT1G63970,AT4G22920,AT5G04900
GO:0072521	purine-containing compound metabolic process	Pre-symbiosis (24 hour)	1	1	8	AT1G03110,AT1G16350,AT1G79680,AT3G26410,AT4G34900,AT5G47680,AT5G58220,ATMG01360
GO:0019439	aromatic compound catabolic process	Pre-symbiosis (24 hour)	1	1	10	AT1G08370,AT2G22090,AT3G13300,AT4G10490,AT4G22920,AT4G34900,AT5G04900,AT5G21160,AT5G44070,AT5G53970
GO:0072491	toluene-containing compound catabolic process	Pre-symbiosis (24 hour)	1	1	1	AT1G17170
GO:0046263	nitrotoluene catabolic process	Pre-symbiosis (24 hour)	1	1	1	AT1G17170
GO:0046260	trinitrotoluene catabolic process	Pre-symbiosis (24 hour)	1	1	1	AT1G17170
GO:0046256	2,4,6-trinitrotoluene catabolic process	Pre-symbiosis (24 hour)	1	1	1	AT1G17170
GO:0019336	phenol-containing compound catabolic process	Pre-symbiosis (24 hour)	1	1	1	AT4G10490
GO:0046244	salicylic acid catabolic process	Pre-symbiosis (24 hour)	1	1	1	AT4G10490
GO:0033015	tetrapyrrole catabolic process	Pre-symbiosis (24 hour)	1	1	2	AT4G22920,AT5G04900
GO:0006787	porphyrin-containing compound catabolic process	Pre-symbiosis (24 hour)	1	1	2	AT4G22920,AT5G04900
GO:0015996	chlorophyll catabolic process	Pre-symbiosis (24 hour)	1	1	2	AT4G22920,AT5G04900
GO:0072523	purine-containing compound catabolic process	Pre-symbiosis (24 hour)	1	1	1	AT4G34900
GO:0009698	phenylpropanoid metabolic process	Pre-symbiosis (24 hour)	1	1	4	AT1G15950,AT1G61820,AT1G72680,AT4G01070
GO:0009808	lignin metabolic process	Pre-symbiosis (24 hour)	1	1	4	AT1G15950,AT1G61820,AT1G72680,AT4G01070
GO:0055086	nucleobase-containing small molecule metabolic process	Pre-symbiosis (24 hour)	1	1	11	AT1G03110,AT1G16350,AT1G79680,AT3G26410,AT4G34900,AT5G12200,AT5G47680,AT5G55810,AT5G58220,AT5G64370,ATMG01360
GO:0009112	nucleobase metabolic process	Pre-symbiosis (24 hour)	1	1	4	AT4G34900,AT5G12200,AT5G58220,AT5G64370
GO:0006206	pyrimidine nucleobase metabolic process	Pre-symbiosis (24 hour)	1	1	2	AT5G12200,AT5G64370
GO:0019860	uracil metabolic process	Pre-symbiosis (24 hour)	1	1	2	AT5G12200,AT5G64370
GO:0006208	pyrimidine nucleobase catabolic process	Pre-symbiosis (24 hour)	1	1	2	AT5G12200,AT5G64370
GO:0006212	uracil catabolic process	Pre-symbiosis (24 hour)	1	1	2	AT5G12200,AT5G64370
GO:0006144	purine nucleobase metabolic process	Pre-symbiosis (24 hour)	1	1	2	AT4G34900,AT5G58220
GO:0046110	xanthine metabolic process	Pre-symbiosis (24 hour)	1	1	1	AT4G34900
GO:0006145	purine nucleobase catabolic process	Pre-symbiosis (24 hour)	1	1	1	AT4G34900
GO:0009115	xanthine catabolic process	Pre-symbiosis (24 hour)	1	1	1	AT4G34900
GO:0009116	nucleoside metabolic process	Pre-symbiosis (24 hour)	1	1	4	AT1G03110,AT1G16350,AT3G26410,AT5G47680
GO:0009119	ribonucleoside metabolic process	Pre-symbiosis (24 hour)	1	1	4	AT1G03110,AT1G16350,AT3G26410,AT5G47680
GO:0042278	purine nucleoside metabolic process	Pre-symbiosis (24 hour)	1	1	4	AT1G03110,AT1G16350,AT3G26410,AT5G47680
GO:0046128	purine ribonucleoside metabolic process	Pre-symbiosis (24 hour)	1	1	4	AT1G03110,AT1G16350,AT3G26410,AT5G47680
GO:0080180	2-methylguanosine metabolic process	Pre-symbiosis (24 hour)	1	1	1	AT3G26410
GO:0008618	7-methylguanosine metabolic process	Pre-symbiosis (24 hour)	1	1	1	AT1G03110
GO:0080179	1-methylguanosine metabolic process	Pre-symbiosis (24 hour)	1	1	1	AT5G47680
GO:0090305	nucleic acid phosphodiester bond hydrolysis	Pre-symbiosis (24 hour)	1	1	8	AT1G08370,AT1G09700,AT1G42440,AT3G07750,AT3G13170,AT3G13300,AT3G16260,AT5G11010
GO:0006259	DNA metabolic process	Pre-symbiosis (24 hour)	1	1	26	AT1G05910,AT1G10520,AT1G27880,AT1G33240,AT1G47720,AT1G50410,AT1G75230,AT2G17690,AT2G27040,AT3G05740,AT3G12380,AT3G13170,AT3G17310,AT3G22880,AT3G27730,AT3G48160,AT3G49250,AT4G31270,AT4G31400,AT4G38600,AT5G04290,AT5G04560,AT5G14620,AT5G16690,AT5G56950,AT5G58130
GO:0006305	DNA alkylation	Pre-symbiosis (24 hour)	1	1	7	AT1G50410,AT2G27040,AT3G17310,AT3G49250,AT5G04290,AT5G04560,AT5G14620
GO:0006306	DNA methylation	Pre-symbiosis (24 hour)	1	1	7	AT1G50410,AT2G27040,AT3G17310,AT3G49250,AT5G04290,AT5G04560,AT5G14620
GO:0035510	DNA dealkylation	Pre-symbiosis (24 hour)	1	1	4	AT1G05910,AT1G75230,AT4G31270,AT5G58130
GO:0080111	DNA demethylation	Pre-symbiosis (24 hour)	1	1	3	AT1G05910,AT4G31270,AT5G58130
GO:0006310	DNA recombination	Pre-symbiosis (24 hour)	1	1	9	AT1G27880,AT1G47720,AT2G17690,AT3G05740,AT3G13170,AT3G22880,AT3G27730,AT4G31400,AT5G56950
GO:0006312	mitotic recombination	Pre-symbiosis (24 hour)	1	1	1	AT3G22880
GO:0035825	homologous recombination	Pre-symbiosis (24 hour)	1	1	3	AT3G13170,AT3G22880,AT3G27730
GO:0016444	somatic cell DNA recombination	Pre-symbiosis (24 hour)	1	1	1	AT5G56950
GO:0042148	strand invasion	Pre-symbiosis (24 hour)	1	1	1	AT3G22880
GO:0000959	mitochondrial RNA metabolic process	Pre-symbiosis (24 hour)	1	1	2	AT2G13600,AT3G16260
GO:0034660	ncRNA metabolic process	Pre-symbiosis (24 hour)	1	1	18	AT1G03110,AT1G09290,AT1G09700,AT1G12800,AT1G42440,AT1G68460,AT1G69070,AT3G07750,AT3G10530,AT3G16260,AT3G26410,AT4G09730,AT4G22720,AT4G34910,AT4G39280,AT5G10070,AT5G11010,AT5G47680
GO:0016073	snRNA metabolic process	Pre-symbiosis (24 hour)	1	1	1	AT3G07750
GO:0016072	rRNA metabolic process	Pre-symbiosis (24 hour)	1	1	1	AT1G69070
GO:0006399	tRNA metabolic process	Pre-symbiosis (24 hour)	1	1	9	AT1G03110,AT1G09290,AT1G68460,AT3G07750,AT3G16260,AT3G26410,AT4G22720,AT4G39280,AT5G47680
GO:0043039	tRNA aminoacylation	Pre-symbiosis (24 hour)	1	1	1	AT4G39280
GO:0070525	tRNA threonylcarbamoyladenosine metabolic process	Pre-symbiosis (24 hour)	1	1	1	AT4G22720
GO:0010501	RNA secondary structure unwinding	Pre-symbiosis (24 hour)	1	1	6	AT1G31970,AT3G06480,AT3G27730,AT4G09730,AT4G34910,AT5G51280
GO:0016071	mRNA metabolic process	Pre-symbiosis (24 hour)	1	1	23	AT1G08370,AT1G09700,AT1G11290,AT1G12700,AT1G21320,AT1G63130,AT2G13600,AT2G22090,AT2G41720,AT2G42610,AT3G03340,AT3G07750,AT3G13300,AT3G13570,AT3G52210,AT3G55460,AT3G58560,AT4G21660,AT5G04290,AT5G21160,AT5G47010,AT5G53180,AT5G61140
GO:0090501	RNA phosphodiester bond hydrolysis	Pre-symbiosis (24 hour)	1	1	5	AT1G09700,AT1G42440,AT3G07750,AT3G16260,AT5G11010
GO:0090502	RNA phosphodiester bond hydrolysis, endonucleolytic	Pre-symbiosis (24 hour)	1	1	4	AT1G09700,AT1G42440,AT3G16260,AT5G11010
GO:0090503	RNA phosphodiester bond hydrolysis, exonucleolytic	Pre-symbiosis (24 hour)	1	1	1	AT3G07750
GO:0006379	mRNA cleavage	Pre-symbiosis (24 hour)	1	1	1	AT1G09700
GO:0006396	RNA processing	Pre-symbiosis (24 hour)	1	1	26	AT1G03110,AT1G09290,AT1G12800,AT1G14790,AT1G21320,AT1G42440,AT1G48650,AT1G69070,AT2G17520,AT2G27040,AT2G29210,AT2G41720,AT3G03340,AT3G13570,AT3G16260,AT3G49430,AT3G52210,AT3G55460,AT3G58560,AT4G21660,AT4G22720,AT4G34910,AT5G10070,AT5G11010,AT5G47680,AT5G53180
GO:0036260	RNA capping	Pre-symbiosis (24 hour)	1	1	1	AT3G52210
GO:0009452	7-methylguanosine RNA capping	Pre-symbiosis (24 hour)	1	1	1	AT3G52210
GO:0031123	RNA 3'-end processing	Pre-symbiosis (24 hour)	1	1	3	AT2G39740,AT3G07750,AT3G16260
GO:0071076	RNA 3' uridylation	Pre-symbiosis (24 hour)	1	1	1	AT2G39740
GO:0031425	chloroplast RNA processing	Pre-symbiosis (24 hour)	1	1	1	AT2G41720
GO:0008380	RNA splicing	Pre-symbiosis (24 hour)	1	1	10	AT1G21320,AT2G17520,AT2G29210,AT2G41720,AT3G03340,AT3G13570,AT3G49430,AT3G55460,AT4G21660,AT5G53180
GO:0000375	RNA splicing, via transesterification reactions	Pre-symbiosis (24 hour)	1	1	6	AT1G21320,AT3G03340,AT3G13570,AT3G55460,AT4G21660,AT5G53180
GO:0000377	RNA splicing, via transesterification reactions with bulged adenosine as nucleophile	Pre-symbiosis (24 hour)	1	1	6	AT1G21320,AT3G03340,AT3G13570,AT3G55460,AT4G21660,AT5G53180
GO:0006397	mRNA processing	Pre-symbiosis (24 hour)	1	1	10	AT1G21320,AT2G41720,AT3G03340,AT3G13570,AT3G52210,AT3G55460,AT3G58560,AT4G21660,AT5G04290,AT5G53180
GO:0010239	chloroplast mRNA processing	Pre-symbiosis (24 hour)	1	1	1	AT2G41720
GO:0006370	7-methylguanosine mRNA capping	Pre-symbiosis (24 hour)	1	1	1	AT3G52210
GO:0000398	mRNA splicing, via spliceosome	Pre-symbiosis (24 hour)	1	1	6	AT1G21320,AT3G03340,AT3G13570,AT3G55460,AT4G21660,AT5G53180
GO:0000380	alternative mRNA splicing, via spliceosome	Pre-symbiosis (24 hour)	1	1	1	AT5G53180
GO:0034470	ncRNA processing	Pre-symbiosis (24 hour)	1	1	17	AT1G03110,AT1G09290,AT1G09700,AT1G12800,AT1G42440,AT1G68460,AT1G69070,AT3G07750,AT3G10530,AT3G16260,AT3G26410,AT4G09730,AT4G22720,AT4G34910,AT5G10070,AT5G11010,AT5G47680
GO:0043628	ncRNA 3'-end processing	Pre-symbiosis (24 hour)	1	1	2	AT3G07750,AT3G16260
GO:0008033	tRNA processing	Pre-symbiosis (24 hour)	1	1	7	AT1G03110,AT1G09290,AT1G68460,AT3G16260,AT3G26410,AT4G22720,AT5G47680
GO:1905267	endonucleolytic cleavage involved in tRNA processing	Pre-symbiosis (24 hour)	1	1	1	AT3G16260
GO:0042780	tRNA 3'-end processing	Pre-symbiosis (24 hour)	1	1	1	AT3G16260
GO:0042779	tRNA 3'-trailer cleavage	Pre-symbiosis (24 hour)	1	1	1	AT3G16260
GO:0034414	tRNA 3'-trailer cleavage, endonucleolytic	Pre-symbiosis (24 hour)	1	1	1	AT3G16260
GO:0072684	mitochondrial tRNA 3'-trailer cleavage, endonucleolytic	Pre-symbiosis (24 hour)	1	1	1	AT3G16260
GO:0016180	snRNA processing	Pre-symbiosis (24 hour)	1	1	1	AT3G07750
GO:0034472	snRNA 3'-end processing	Pre-symbiosis (24 hour)	1	1	1	AT3G07750
GO:0034475	U4 snRNA 3'-end processing	Pre-symbiosis (24 hour)	1	1	1	AT3G07750
GO:0034476	U5 snRNA 3'-end processing	Pre-symbiosis (24 hour)	1	1	1	AT3G07750
GO:0034473	U1 snRNA 3'-end processing	Pre-symbiosis (24 hour)	1	1	1	AT3G07750
GO:0009451	RNA modification	Pre-symbiosis (24 hour)	1	1	12	AT1G02420,AT1G09290,AT1G11290,AT2G13600,AT2G36240,AT2G41720,AT3G29290,AT4G04370,AT4G19890,AT4G22720,AT5G15280,AT5G47680
GO:1900864	mitochondrial RNA modification	Pre-symbiosis (24 hour)	1	1	1	AT2G13600
GO:0016556	mRNA modification	Pre-symbiosis (24 hour)	1	1	2	AT1G11290,AT2G13600
GO:0080156	mitochondrial mRNA modification	Pre-symbiosis (24 hour)	1	1	1	AT2G13600
GO:0001510	RNA methylation	Pre-symbiosis (24 hour)	1	1	1	AT3G52210
GO:0036265	RNA (guanine-N7)-methylation	Pre-symbiosis (24 hour)	1	1	1	AT3G52210
GO:0106005	RNA 5'-cap (guanine-N7)-methylation	Pre-symbiosis (24 hour)	1	1	1	AT3G52210
GO:0006400	tRNA modification	Pre-symbiosis (24 hour)	1	1	6	AT1G03110,AT1G09290,AT1G68460,AT3G26410,AT4G22720,AT5G47680
GO:0002949	tRNA threonylcarbamoyladenosine modification	Pre-symbiosis (24 hour)	1	1	1	AT4G22720
GO:0034655	nucleobase-containing compound catabolic process	Pre-symbiosis (24 hour)	1	1	4	AT1G08370,AT2G22090,AT3G13300,AT5G21160
GO:0006401	RNA catabolic process	Pre-symbiosis (24 hour)	1	1	7	AT1G08370,AT2G22090,AT3G07750,AT3G12680,AT3G13300,AT5G21160,AT5G47010
GO:0034661	ncRNA catabolic process	Pre-symbiosis (24 hour)	1	1	1	AT3G07750
GO:0016078	tRNA catabolic process	Pre-symbiosis (24 hour)	1	1	1	AT3G07750
GO:0016075	rRNA catabolic process	Pre-symbiosis (24 hour)	1	1	1	AT3G07750
GO:0071025	RNA surveillance	Pre-symbiosis (24 hour)	1	1	1	AT3G07750
GO:0071027	nuclear RNA surveillance	Pre-symbiosis (24 hour)	1	1	1	AT3G07750
GO:0071029	nuclear ncRNA surveillance	Pre-symbiosis (24 hour)	1	1	1	AT3G07750
GO:0043633	polyadenylation-dependent RNA catabolic process	Pre-symbiosis (24 hour)	1	1	1	AT3G07750
GO:0043634	polyadenylation-dependent ncRNA catabolic process	Pre-symbiosis (24 hour)	1	1	1	AT3G07750
GO:0071046	nuclear polyadenylation-dependent ncRNA catabolic process	Pre-symbiosis (24 hour)	1	1	1	AT3G07750
GO:0071035	nuclear polyadenylation-dependent rRNA catabolic process	Pre-symbiosis (24 hour)	1	1	1	AT3G07750
GO:0071038	nuclear polyadenylation-dependent tRNA catabolic process	Pre-symbiosis (24 hour)	1	1	1	AT3G07750
GO:0042430	indole-containing compound metabolic process	Pre-symbiosis (24 hour)	1	1	7	AT1G75500,AT4G23100,AT4G35160,AT4G37320,AT4G37330,AT4G37340,AT5G44070
GO:0046217	indole phytoalexin metabolic process	Pre-symbiosis (24 hour)	1	1	1	AT4G23100
GO:0006586	indolalkylamine metabolic process	Pre-symbiosis (24 hour)	1	1	1	AT1G75500
GO:0042436	indole-containing compound catabolic process	Pre-symbiosis (24 hour)	1	1	1	AT5G44070
GO:0009072	aromatic amino acid family metabolic process	Pre-symbiosis (24 hour)	1	1	2	AT1G75500,AT5G53970
GO:0009074	aromatic amino acid family catabolic process	Pre-symbiosis (24 hour)	1	1	1	AT5G53970
GO:0006570	tyrosine metabolic process	Pre-symbiosis (24 hour)	1	1	1	AT5G53970
GO:0006572	tyrosine catabolic process	Pre-symbiosis (24 hour)	1	1	1	AT5G53970
GO:0006568	tryptophan metabolic process	Pre-symbiosis (24 hour)	1	1	1	AT1G75500
GO:0072593	reactive oxygen species metabolic process	Pre-symbiosis (24 hour)	1	1	4	AT1G62810,AT1G67080,AT3G47450,AT5G10530
GO:0042743	hydrogen peroxide metabolic process	Pre-symbiosis (24 hour)	1	1	1	AT5G10530
GO:0046209	nitric oxide metabolic process	Pre-symbiosis (24 hour)	1	1	2	AT1G62810,AT3G47450
GO:0006801	superoxide metabolic process	Pre-symbiosis (24 hour)	1	1	1	AT1G67080
GO:0042554	superoxide anion generation	Pre-symbiosis (24 hour)	1	1	1	AT1G67080
GO:1903409	reactive oxygen species biosynthetic process	Pre-symbiosis (24 hour)	1	1	2	AT1G62810,AT3G47450
GO:0015979	photosynthesis	Pre-symbiosis (24 hour)	1	1	2	AT3G15095,AT4G04020
GO:0006790	sulfur compound metabolic process	Pre-symbiosis (24 hour)	1	1	10	AT1G74590,AT3G04070,AT3G09270,AT4G23100,AT4G37320,AT4G37330,AT4G37340,AT5G32470,AT5G44070,AT5G54680
GO:0016143	S-glycoside metabolic process	Pre-symbiosis (24 hour)	1	1	6	AT4G23100,AT4G37320,AT4G37330,AT4G37340,AT5G44070,AT5G54680
GO:0019757	glycosinolate metabolic process	Pre-symbiosis (24 hour)	1	1	6	AT4G23100,AT4G37320,AT4G37330,AT4G37340,AT5G44070,AT5G54680
GO:0019760	glucosinolate metabolic process	Pre-symbiosis (24 hour)	1	1	6	AT4G23100,AT4G37320,AT4G37330,AT4G37340,AT5G44070,AT5G54680
GO:0042343	indole glucosinolate metabolic process	Pre-symbiosis (24 hour)	1	1	4	AT4G37320,AT4G37330,AT4G37340,AT5G44070
GO:0000096	sulfur amino acid metabolic process	Pre-symbiosis (24 hour)	1	1	1	AT3G04070
GO:0044273	sulfur compound catabolic process	Pre-symbiosis (24 hour)	1	1	1	AT5G44070
GO:0016145	S-glycoside catabolic process	Pre-symbiosis (24 hour)	1	1	1	AT5G44070
GO:0019759	glycosinolate catabolic process	Pre-symbiosis (24 hour)	1	1	1	AT5G44070
GO:0019762	glucosinolate catabolic process	Pre-symbiosis (24 hour)	1	1	1	AT5G44070
GO:0042344	indole glucosinolate catabolic process	Pre-symbiosis (24 hour)	1	1	1	AT5G44070
GO:0042723	thiamine-containing compound metabolic process	Pre-symbiosis (24 hour)	1	1	1	AT5G32470
GO:0006772	thiamine metabolic process	Pre-symbiosis (24 hour)	1	1	1	AT5G32470
GO:0000103	sulfate assimilation	Pre-symbiosis (24 hour)	1	1	1	AT3G03900
GO:0006749	glutathione metabolic process	Pre-symbiosis (24 hour)	1	1	1	AT1G74590
GO:0006091	generation of precursor metabolites and energy	Pre-symbiosis (24 hour)	1	1	6	AT3G15095,AT4G04020,AT4G33520,AT4G36400,AT5G17770,ATMG01360
GO:0015980	energy derivation by oxidation of organic compounds	Pre-symbiosis (24 hour)	1	1	2	AT4G36400,ATMG01360
GO:0045333	cellular respiration	Pre-symbiosis (24 hour)	1	1	2	AT4G36400,ATMG01360
GO:0009060	aerobic respiration	Pre-symbiosis (24 hour)	1	1	1	ATMG01360
GO:0019684	photosynthesis, light reaction	Pre-symbiosis (24 hour)	1	1	2	AT3G15095,AT4G04020
GO:0022900	electron transport chain	Pre-symbiosis (24 hour)	1	1	5	AT4G04020,AT4G33520,AT4G36400,AT5G17770,ATMG01360
GO:0009767	photosynthetic electron transport chain	Pre-symbiosis (24 hour)	1	1	1	AT4G04020
GO:0022904	respiratory electron transport chain	Pre-symbiosis (24 hour)	1	1	2	AT4G36400,ATMG01360
GO:0006793	phosphorus metabolic process	Pre-symbiosis (24 hour)	1	1	24	AT1G16260,AT1G16350,AT1G31190,AT1G61390,AT1G61550,AT1G79680,AT1G80460,AT2G05940,AT2G17520,AT2G19130,AT2G22530,AT2G28940,AT2G32710,AT2G38670,AT2G46580,AT3G47450,AT3G63340,AT4G05200,AT4G11460,AT4G21380,AT4G23180,AT5G13160,AT5G58003,AT5G61760
GO:0019637	organophosphate metabolic process	Pre-symbiosis (24 hour)	1	1	9	AT1G16350,AT1G31190,AT1G79680,AT1G80460,AT2G22530,AT2G38670,AT2G46580,AT3G47450,AT5G61760
GO:0090407	organophosphate biosynthetic process	Pre-symbiosis (24 hour)	1	1	8	AT1G16350,AT1G79680,AT1G80460,AT2G22530,AT2G38670,AT2G46580,AT3G47450,AT5G61760
GO:0046434	organophosphate catabolic process	Pre-symbiosis (24 hour)	1	1	1	AT1G31190
GO:0006796	phosphate-containing compound metabolic process	Pre-symbiosis (24 hour)	1	1	49	AT1G16130,AT1G16260,AT1G16350,AT1G31190,AT1G61390,AT1G61550,AT1G63500,AT1G67580,AT1G72710,AT1G79680,AT1G80460,AT2G05940,AT2G17520,AT2G19130,AT2G22530,AT2G28250,AT2G28940,AT2G31500,AT2G32710,AT2G33540,AT2G38670,AT2G40120,AT2G46580,AT3G09970,AT3G20860,AT3G24550,AT3G28700,AT3G47450,AT3G54950,AT3G57120,AT3G63340,AT4G03390,AT4G05200,AT4G11460,AT4G11530,AT4G21380,AT4G23160,AT4G23180,AT4G33080,AT4G33950…
GO:0019693	ribose phosphate metabolic process	Pre-symbiosis (24 hour)	1	1	2	AT1G16350,AT1G79680
GO:0046390	ribose phosphate biosynthetic process	Pre-symbiosis (24 hour)	1	1	2	AT1G16350,AT1G79680
GO:0052646	alditol phosphate metabolic process	Pre-symbiosis (24 hour)	1	1	1	AT1G80460
GO:0006072	glycerol-3-phosphate metabolic process	Pre-symbiosis (24 hour)	1	1	1	AT1G80460
GO:0046167	glycerol-3-phosphate biosynthetic process	Pre-symbiosis (24 hour)	1	1	1	AT1G80460
GO:0043647	inositol phosphate metabolic process	Pre-symbiosis (24 hour)	1	1	2	AT1G31190,AT5G61760
GO:0033517	myo-inositol hexakisphosphate metabolic process	Pre-symbiosis (24 hour)	1	1	1	AT5G61760
GO:0071545	inositol phosphate catabolic process	Pre-symbiosis (24 hour)	1	1	1	AT1G31190
GO:0032958	inositol phosphate biosynthetic process	Pre-symbiosis (24 hour)	1	1	1	AT5G61760
GO:0010264	myo-inositol hexakisphosphate biosynthetic process	Pre-symbiosis (24 hour)	1	1	1	AT5G61760
GO:0016310	phosphorylation	Pre-symbiosis (24 hour)	1	1	36	AT1G16130,AT1G16260,AT1G61390,AT1G61550,AT1G63500,AT1G67580,AT1G72710,AT2G05940,AT2G17520,AT2G19130,AT2G28250,AT2G28940,AT2G31500,AT2G32710,AT2G40120,AT3G20860,AT3G24550,AT3G57120,AT3G63340,AT4G03390,AT4G05200,AT4G11460,AT4G11530,AT4G21380,AT4G23160,AT4G23180,AT4G23220,AT4G27290,AT4G33080,AT4G33950,AT5G13160,AT5G18910,AT5G40380,AT5G47080,AT5G48820,ATMG01360
GO:0006468	protein phosphorylation	Pre-symbiosis (24 hour)	1	1	35	AT1G16130,AT1G16260,AT1G61390,AT1G61550,AT1G63500,AT1G67580,AT1G72710,AT2G05940,AT2G17520,AT2G19130,AT2G28250,AT2G28940,AT2G31500,AT2G32710,AT2G40120,AT3G20860,AT3G24550,AT3G57120,AT3G63340,AT4G03390,AT4G05200,AT4G11460,AT4G11530,AT4G21380,AT4G23160,AT4G23180,AT4G23220,AT4G27290,AT4G33080,AT4G33950,AT5G13160,AT5G18910,AT5G40380,AT5G47080,AT5G48820
GO:0046777	protein autophosphorylation	Pre-symbiosis (24 hour)	1	1	10	AT1G16130,AT2G17520,AT2G31500,AT2G40120,AT3G24550,AT3G51550,AT4G21380,AT4G33950,AT5G13160,AT5G18910
GO:0018105	peptidyl-serine phosphorylation	Pre-symbiosis (24 hour)	1	1	2	AT1G72710,AT4G33080
GO:0016311	dephosphorylation	Pre-symbiosis (24 hour)	1	1	5	AT1G31190,AT2G33540,AT3G09970,AT3G63340,AT5G58003
GO:0006470	protein dephosphorylation	Pre-symbiosis (24 hour)	1	1	4	AT2G33540,AT3G09970,AT3G63340,AT5G58003
GO:0035335	peptidyl-tyrosine dephosphorylation	Pre-symbiosis (24 hour)	1	1	1	AT3G09970
GO:0006753	nucleoside phosphate metabolic process	Pre-symbiosis (24 hour)	1	1	2	AT1G16350,AT1G79680
GO:0009123	nucleoside monophosphate metabolic process	Pre-symbiosis (24 hour)	1	1	2	AT3G28700,ATMG01360
GO:0009161	ribonucleoside monophosphate metabolic process	Pre-symbiosis (24 hour)	1	1	2	AT3G28700,ATMG01360
GO:0009126	purine nucleoside monophosphate metabolic process	Pre-symbiosis (24 hour)	1	1	2	AT3G28700,ATMG01360
GO:0009167	purine ribonucleoside monophosphate metabolic process	Pre-symbiosis (24 hour)	1	1	2	AT3G28700,ATMG01360
GO:0009141	nucleoside triphosphate metabolic process	Pre-symbiosis (24 hour)	1	1	1	AT1G16350
GO:0009199	ribonucleoside triphosphate metabolic process	Pre-symbiosis (24 hour)	1	1	1	AT1G16350
GO:0009144	purine nucleoside triphosphate metabolic process	Pre-symbiosis (24 hour)	1	1	1	AT1G16350
GO:0009205	purine ribonucleoside triphosphate metabolic process	Pre-symbiosis (24 hour)	1	1	1	AT1G16350
GO:0009117	nucleotide metabolic process	Pre-symbiosis (24 hour)	1	1	2	AT1G16350,AT1G79680
GO:0019362	pyridine nucleotide metabolic process	Pre-symbiosis (24 hour)	1	1	1	AT5G55810
GO:0046496	nicotinamide nucleotide metabolic process	Pre-symbiosis (24 hour)	1	1	1	AT5G55810
GO:0019674	NAD metabolic process	Pre-symbiosis (24 hour)	1	1	1	AT5G55810
GO:0009187	cyclic nucleotide metabolic process	Pre-symbiosis (24 hour)	1	1	1	AT1G79680
GO:0009259	ribonucleotide metabolic process	Pre-symbiosis (24 hour)	1	1	2	AT1G16350,AT1G79680
GO:0006163	purine nucleotide metabolic process	Pre-symbiosis (24 hour)	1	1	2	AT1G16350,AT1G79680
GO:0009150	purine ribonucleotide metabolic process	Pre-symbiosis (24 hour)	1	1	2	AT1G16350,AT1G79680
GO:0046068	cGMP metabolic process	Pre-symbiosis (24 hour)	1	1	1	AT1G79680
GO:0046039	GTP metabolic process	Pre-symbiosis (24 hour)	1	1	1	AT1G16350
GO:0046034	ATP metabolic process	Pre-symbiosis (24 hour)	1	1	2	AT3G28700,ATMG01360
GO:0006119	oxidative phosphorylation	Pre-symbiosis (24 hour)	1	1	1	ATMG01360
GO:0042773	ATP synthesis coupled electron transport	Pre-symbiosis (24 hour)	1	1	1	ATMG01360
GO:0042775	mitochondrial ATP synthesis coupled electron transport	Pre-symbiosis (24 hour)	1	1	1	ATMG01360
GO:0006123	mitochondrial electron transport, cytochrome c to oxygen	Pre-symbiosis (24 hour)	1	1	1	ATMG01360
GO:0044249	cellular biosynthetic process	Pre-symbiosis (24 hour)	1	1	55	AT1G13450,AT1G15950,AT1G16350,AT1G33240,AT1G61820,AT1G62810,AT1G63970,AT1G67080,AT1G72680,AT1G75540,AT1G79680,AT2G03667,AT2G22530,AT2G38670,AT2G45660,AT2G47760,AT3G04070,AT3G06350,AT3G07650,AT3G08550,AT3G15010,AT3G16810,AT3G20390,AT3G20770,AT3G24490,AT3G27100,AT3G47340,AT3G47450,AT3G48820,AT3G54610,AT3G57670,AT3G58560,AT4G01070,AT4G04920,AT4G17880,AT4G22140,AT4G23100,AT4G23980,AT4G26060,AT4G26840…
GO:0044271	cellular nitrogen compound biosynthetic process	Pre-symbiosis (24 hour)	1	1	37	AT1G13450,AT1G16350,AT1G33240,AT1G62810,AT1G63970,AT1G75540,AT1G79680,AT2G03667,AT2G45660,AT3G07650,AT3G16810,AT3G20770,AT3G24490,AT3G27100,AT3G47340,AT3G47450,AT3G54610,AT3G57670,AT4G04920,AT4G17880,AT4G22140,AT4G23100,AT4G23980,AT4G26060,AT4G26840,AT4G31270,AT4G35160,AT4G36990,AT5G09460,AT5G27030,AT5G28040,AT5G39785,AT5G40330,AT5G53180,AT5G54680,AT5G58003,AT5G61760
GO:0043604	amide biosynthetic process	Pre-symbiosis (24 hour)	1	1	1	AT4G35160
GO:0043043	peptide biosynthetic process	Pre-symbiosis (24 hour)	1	1	5	AT3G16810,AT4G23100,AT4G26060,AT5G39785,AT5G53180
GO:0019184	nonribosomal peptide biosynthetic process	Pre-symbiosis (24 hour)	1	1	1	AT4G23100
GO:0046938	phytochelatin biosynthetic process	Pre-symbiosis (24 hour)	1	1	1	AT5G44070
GO:0006809	nitric oxide biosynthetic process	Pre-symbiosis (24 hour)	1	1	2	AT1G62810,AT3G47450
GO:0018130	heterocycle biosynthetic process	Pre-symbiosis (24 hour)	1	1	22	AT1G16350,AT1G33240,AT1G63970,AT1G79680,AT3G07650,AT3G20770,AT3G24490,AT3G54610,AT3G57670,AT4G04920,AT4G17880,AT4G23980,AT4G31270,AT4G35160,AT4G36990,AT5G09460,AT5G27030,AT5G40330,AT5G53970,AT5G54680,AT5G58003,AT5G61760
GO:1901336	lactone biosynthetic process	Pre-symbiosis (24 hour)	1	1	1	AT4G32810
GO:0072528	pyrimidine-containing compound biosynthetic process	Pre-symbiosis (24 hour)	1	1	1	AT5G32470
GO:0072525	pyridine-containing compound biosynthetic process	Pre-symbiosis (24 hour)	1	1	2	AT2G46580,AT5G55810
GO:0019428	allantoin biosynthetic process	Pre-symbiosis (24 hour)	1	1	1	AT5G58220
GO:0044272	sulfur compound biosynthetic process	Pre-symbiosis (24 hour)	1	1	2	AT4G23100,AT5G32470
GO:0016144	S-glycoside biosynthetic process	Pre-symbiosis (24 hour)	1	1	1	AT4G23100
GO:0019758	glycosinolate biosynthetic process	Pre-symbiosis (24 hour)	1	1	1	AT4G23100
GO:0019761	glucosinolate biosynthetic process	Pre-symbiosis (24 hour)	1	1	1	AT4G23100
GO:0006750	glutathione biosynthetic process	Pre-symbiosis (24 hour)	1	1	1	AT4G23100
GO:0034645	cellular macromolecule biosynthetic process	Pre-symbiosis (24 hour)	1	1	34	AT1G13450,AT1G33240,AT1G75540,AT2G22530,AT2G45660,AT2G47760,AT3G07650,AT3G08550,AT3G16810,AT3G20770,AT3G24490,AT3G27100,AT3G48820,AT3G54610,AT3G57670,AT3G58560,AT4G04920,AT4G17880,AT4G22140,AT4G23980,AT4G26060,AT4G26840,AT4G31270,AT4G36990,AT5G09460,AT5G27030,AT5G28040,AT5G39785,AT5G40330,AT5G53180,AT5G54680,AT5G58003,AT5G61760,AT5G63840
GO:0042158	lipoprotein biosynthetic process	Pre-symbiosis (24 hour)	1	1	1	AT2G22530
GO:0006497	protein lipidation	Pre-symbiosis (24 hour)	1	1	1	AT2G22530
GO:0009101	glycoprotein biosynthetic process	Pre-symbiosis (24 hour)	1	1	3	AT2G47760,AT3G48820,AT5G03080
GO:0006486	protein glycosylation	Pre-symbiosis (24 hour)	1	1	3	AT2G47760,AT3G48820,AT5G03080
GO:0006493	protein O-linked glycosylation	Pre-symbiosis (24 hour)	1	1	1	AT5G62620
GO:0018258	protein O-linked glycosylation via hydroxyproline	Pre-symbiosis (24 hour)	1	1	1	AT5G62620
GO:0006487	protein N-linked glycosylation	Pre-symbiosis (24 hour)	1	1	1	AT3G48820
GO:0018279	protein N-linked glycosylation via asparagine	Pre-symbiosis (24 hour)	1	1	1	AT3G48820
GO:0006260	DNA replication	Pre-symbiosis (24 hour)	1	1	1	AT1G33240
GO:0006261	DNA-dependent DNA replication	Pre-symbiosis (24 hour)	1	1	1	AT1G33240
GO:0044786	cell cycle DNA replication	Pre-symbiosis (24 hour)	1	1	1	AT1G33240
GO:0042023	DNA endoreduplication	Pre-symbiosis (24 hour)	1	1	1	AT1G33240
GO:0033260	nuclear DNA replication	Pre-symbiosis (24 hour)	1	1	1	AT5G16690
GO:0006270	DNA replication initiation	Pre-symbiosis (24 hour)	1	1	1	AT5G16690
GO:0006412	translation	Pre-symbiosis (24 hour)	1	1	2	AT3G16810,AT4G26060
GO:0006418	tRNA aminoacylation for protein translation	Pre-symbiosis (24 hour)	1	1	1	AT4G39280
GO:0006432	phenylalanyl-tRNA aminoacylation	Pre-symbiosis (24 hour)	1	1	1	AT4G39280
GO:0043450	alkene biosynthetic process	Pre-symbiosis (24 hour)	1	1	2	AT3G04070,AT3G15010
GO:0009693	ethylene biosynthetic process	Pre-symbiosis (24 hour)	1	1	2	AT3G04070,AT3G15010
GO:0009403	toxin biosynthetic process	Pre-symbiosis (24 hour)	1	1	1	AT4G23100
GO:0052315	phytoalexin biosynthetic process	Pre-symbiosis (24 hour)	1	1	1	AT4G23100
GO:0009110	vitamin biosynthetic process	Pre-symbiosis (24 hour)	1	1	3	AT2G46580,AT5G32470,AT5G53970
GO:0042362	fat-soluble vitamin biosynthetic process	Pre-symbiosis (24 hour)	1	1	1	AT5G53970
GO:0010189	vitamin E biosynthetic process	Pre-symbiosis (24 hour)	1	1	1	AT5G53970
GO:0042364	water-soluble vitamin biosynthetic process	Pre-symbiosis (24 hour)	1	1	2	AT2G46580,AT5G32470
GO:0042819	vitamin B6 biosynthetic process	Pre-symbiosis (24 hour)	1	1	1	AT2G46580
GO:0016053	organic acid biosynthetic process	Pre-symbiosis (24 hour)	1	1	17	AT1G18640,AT1G67080,AT1G68320,AT1G79460,AT2G03667,AT2G43710,AT3G06350,AT3G11470,AT3G15690,AT3G20390,AT3G23940,AT3G47340,AT4G03560,AT4G13050,AT4G33950,AT5G42650,AT5G51830
GO:0046394	carboxylic acid biosynthetic process	Pre-symbiosis (24 hour)	1	1	17	AT1G18640,AT1G67080,AT1G68320,AT1G79460,AT2G03667,AT2G43710,AT3G06350,AT3G11470,AT3G15690,AT3G20390,AT3G23940,AT3G47340,AT4G03560,AT4G13050,AT4G33950,AT5G42650,AT5G51830
GO:0072330	monocarboxylic acid biosynthetic process	Pre-symbiosis (24 hour)	1	1	10	AT1G67080,AT2G03667,AT2G43710,AT3G15690,AT3G47340,AT4G03560,AT4G13050,AT4G33950,AT5G42650,AT5G51830
GO:0009695	jasmonic acid biosynthetic process	Pre-symbiosis (24 hour)	1	1	2	AT4G03560,AT5G42650
GO:0043650	dicarboxylic acid biosynthetic process	Pre-symbiosis (24 hour)	1	1	1	AT3G06350
GO:0009423	chorismate biosynthetic process	Pre-symbiosis (24 hour)	1	1	1	AT3G06350
GO:0008652	cellular amino acid biosynthetic process	Pre-symbiosis (24 hour)	1	1	3	AT2G03667,AT3G20390,AT3G47340
GO:1901607	alpha-amino acid biosynthetic process	Pre-symbiosis (24 hour)	1	1	3	AT2G03667,AT3G11470,AT3G47340
GO:0009070	serine family amino acid biosynthetic process	Pre-symbiosis (24 hour)	1	1	1	AT1G18640
GO:0006564	L-serine biosynthetic process	Pre-symbiosis (24 hour)	1	1	1	AT1G18640
GO:0009067	aspartate family amino acid biosynthetic process	Pre-symbiosis (24 hour)	1	1	3	AT2G03667,AT3G11470,AT3G47340
GO:0009085	lysine biosynthetic process	Pre-symbiosis (24 hour)	1	1	1	AT3G11470
GO:0019878	lysine biosynthetic process via aminoadipic acid	Pre-symbiosis (24 hour)	1	1	1	AT3G11470
GO:0009082	branched-chain amino acid biosynthetic process	Pre-symbiosis (24 hour)	1	1	2	AT3G20390,AT3G23940
GO:0051188	cofactor biosynthetic process	Pre-symbiosis (24 hour)	1	1	2	AT1G63970,AT2G46580
GO:0009108	coenzyme biosynthetic process	Pre-symbiosis (24 hour)	1	1	1	AT2G46580
GO:0010192	mucilage biosynthetic process	Pre-symbiosis (24 hour)	1	1	1	AT5G62620
GO:0019438	aromatic compound biosynthetic process	Pre-symbiosis (24 hour)	1	1	24	AT1G16350,AT1G33240,AT1G61820,AT1G63970,AT1G72680,AT1G79680,AT3G07650,AT3G20770,AT3G24490,AT3G54610,AT3G57670,AT4G01070,AT4G04920,AT4G17880,AT4G23980,AT4G31270,AT4G35160,AT4G36990,AT5G09460,AT5G27030,AT5G40330,AT5G54680,AT5G58003,AT5G61760
GO:0034654	nucleobase-containing compound biosynthetic process	Pre-symbiosis (24 hour)	1	1	19	AT1G16350,AT1G33240,AT1G79680,AT3G07650,AT3G20770,AT3G24490,AT3G54610,AT3G57670,AT4G04920,AT4G17880,AT4G23980,AT4G31270,AT4G36990,AT5G09460,AT5G27030,AT5G40330,AT5G54680,AT5G58003,AT5G61760
GO:1901293	nucleoside phosphate biosynthetic process	Pre-symbiosis (24 hour)	1	1	2	AT1G16350,AT1G79680
GO:0009142	nucleoside triphosphate biosynthetic process	Pre-symbiosis (24 hour)	1	1	1	AT1G16350
GO:0009201	ribonucleoside triphosphate biosynthetic process	Pre-symbiosis (24 hour)	1	1	1	AT1G16350
GO:0009145	purine nucleoside triphosphate biosynthetic process	Pre-symbiosis (24 hour)	1	1	1	AT1G16350
GO:0009206	purine ribonucleoside triphosphate biosynthetic process	Pre-symbiosis (24 hour)	1	1	1	AT1G16350
GO:0009165	nucleotide biosynthetic process	Pre-symbiosis (24 hour)	1	1	2	AT1G16350,AT1G79680
GO:0009260	ribonucleotide biosynthetic process	Pre-symbiosis (24 hour)	1	1	2	AT1G16350,AT1G79680
GO:0009190	cyclic nucleotide biosynthetic process	Pre-symbiosis (24 hour)	1	1	1	AT1G79680
GO:0019363	pyridine nucleotide biosynthetic process	Pre-symbiosis (24 hour)	1	1	1	AT5G55810
GO:0019359	nicotinamide nucleotide biosynthetic process	Pre-symbiosis (24 hour)	1	1	1	AT5G55810
GO:0019355	nicotinamide nucleotide biosynthetic process from aspartate	Pre-symbiosis (24 hour)	1	1	1	AT5G55810
GO:0009435	NAD biosynthetic process	Pre-symbiosis (24 hour)	1	1	1	AT5G55810
GO:0034627	'de novo' NAD biosynthetic process	Pre-symbiosis (24 hour)	1	1	1	AT5G55810
GO:0034628	'de novo' NAD biosynthetic process from aspartate	Pre-symbiosis (24 hour)	1	1	1	AT5G55810
GO:0009163	nucleoside biosynthetic process	Pre-symbiosis (24 hour)	1	1	1	AT1G16350
GO:0042455	ribonucleoside biosynthetic process	Pre-symbiosis (24 hour)	1	1	1	AT1G16350
GO:0032774	RNA biosynthetic process	Pre-symbiosis (24 hour)	1	1	36	AT1G05910,AT1G06920,AT1G13450,AT1G22770,AT1G33240,AT1G75540,AT2G27040,AT2G33540,AT2G45660,AT3G07650,AT3G20770,AT3G24490,AT3G27100,AT3G54610,AT3G57670,AT4G04920,AT4G17880,AT4G22140,AT4G23980,AT4G26640,AT4G26840,AT4G29100,AT4G31270,AT4G35580,AT4G36990,AT5G09460,AT5G20730,AT5G27030,AT5G28040,AT5G40330,AT5G54680,AT5G56960,AT5G58003,AT5G61760,AT5G62940,AT5G63320
GO:0097659	nucleic acid-templated transcription	Pre-symbiosis (24 hour)	1	1	36	AT1G05910,AT1G06920,AT1G13450,AT1G22770,AT1G33240,AT1G75540,AT2G27040,AT2G33540,AT2G45660,AT3G07650,AT3G20770,AT3G24490,AT3G27100,AT3G54610,AT3G57670,AT4G04920,AT4G17880,AT4G22140,AT4G23980,AT4G26640,AT4G26840,AT4G29100,AT4G31270,AT4G35580,AT4G36990,AT5G09460,AT5G20730,AT5G27030,AT5G28040,AT5G40330,AT5G54680,AT5G56960,AT5G58003,AT5G61760,AT5G62940,AT5G63320
GO:0006351	transcription, DNA-templated	Pre-symbiosis (24 hour)	1	1	36	AT1G05910,AT1G06920,AT1G13450,AT1G22770,AT1G33240,AT1G75540,AT2G27040,AT2G33540,AT2G45660,AT3G07650,AT3G20770,AT3G24490,AT3G27100,AT3G54610,AT3G57670,AT4G04920,AT4G17880,AT4G22140,AT4G23980,AT4G26640,AT4G26840,AT4G29100,AT4G31270,AT4G35580,AT4G36990,AT5G09460,AT5G20730,AT5G27030,AT5G28040,AT5G40330,AT5G54680,AT5G56960,AT5G58003,AT5G61760,AT5G62940,AT5G63320
GO:0006366	transcription from RNA polymerase II promoter	Pre-symbiosis (24 hour)	1	1	13	AT1G05910,AT1G32750,AT2G22370,AT2G33540,AT2G45660,AT3G27100,AT3G42170,AT4G29100,AT5G04290,AT5G09850,AT5G40330,AT5G43130,AT5G58003
GO:0009299	mRNA transcription	Pre-symbiosis (24 hour)	1	1	1	AT2G42610
GO:0006354	DNA-templated transcription, elongation	Pre-symbiosis (24 hour)	1	1	3	AT2G22370,AT5G04290,AT5G09850
GO:0006368	transcription elongation from RNA polymerase II promoter	Pre-symbiosis (24 hour)	1	1	2	AT5G04290,AT5G09850
GO:0006353	DNA-templated transcription, termination	Pre-symbiosis (24 hour)	1	1	1	AT2G22370
GO:0006369	termination of RNA polymerase II transcription	Pre-symbiosis (24 hour)	1	1	1	AT2G22370
GO:0006352	DNA-templated transcription, initiation	Pre-symbiosis (24 hour)	1	1	1	AT2G22370
GO:0042724	thiamine-containing compound biosynthetic process	Pre-symbiosis (24 hour)	1	1	1	AT5G32470
GO:0009228	thiamine biosynthetic process	Pre-symbiosis (24 hour)	1	1	1	AT5G32470
GO:0072522	purine-containing compound biosynthetic process	Pre-symbiosis (24 hour)	1	1	2	AT1G16350,AT1G79680
GO:0042451	purine nucleoside biosynthetic process	Pre-symbiosis (24 hour)	1	1	1	AT1G16350
GO:0046129	purine ribonucleoside biosynthetic process	Pre-symbiosis (24 hour)	1	1	1	AT1G16350
GO:1901070	guanosine-containing compound biosynthetic process	Pre-symbiosis (24 hour)	1	1	1	AT1G16350
GO:0006164	purine nucleotide biosynthetic process	Pre-symbiosis (24 hour)	1	1	2	AT1G16350,AT1G79680
GO:0052652	cyclic purine nucleotide metabolic process	Pre-symbiosis (24 hour)	1	1	1	AT1G79680
GO:0009152	purine ribonucleotide biosynthetic process	Pre-symbiosis (24 hour)	1	1	2	AT1G16350,AT1G79680
GO:0006182	cGMP biosynthetic process	Pre-symbiosis (24 hour)	1	1	1	AT1G79680
GO:0006183	GTP biosynthetic process	Pre-symbiosis (24 hour)	1	1	1	AT1G16350
GO:0042435	indole-containing compound biosynthetic process	Pre-symbiosis (24 hour)	1	1	1	AT4G35160
GO:0009700	indole phytoalexin biosynthetic process	Pre-symbiosis (24 hour)	1	1	1	AT4G23100
GO:0009699	phenylpropanoid biosynthetic process	Pre-symbiosis (24 hour)	1	1	4	AT1G15950,AT1G61820,AT1G72680,AT4G01070
GO:0010345	suberin biosynthetic process	Pre-symbiosis (24 hour)	1	1	1	AT5G41040
GO:0033014	tetrapyrrole biosynthetic process	Pre-symbiosis (24 hour)	1	1	2	AT1G50170,AT1G63970
GO:0006779	porphyrin-containing compound biosynthetic process	Pre-symbiosis (24 hour)	1	1	2	AT1G50170,AT1G63970
GO:0015995	chlorophyll biosynthetic process	Pre-symbiosis (24 hour)	1	1	1	AT1G63970
GO:0006783	heme biosynthetic process	Pre-symbiosis (24 hour)	1	1	1	AT1G50170
GO:0019354	siroheme biosynthetic process	Pre-symbiosis (24 hour)	1	1	1	AT1G50170
GO:0006081	cellular aldehyde metabolic process	Pre-symbiosis (24 hour)	1	1	2	AT2G46580,AT3G47450
GO:0046184	aldehyde biosynthetic process	Pre-symbiosis (24 hour)	1	1	1	AT2G46580
GO:0019682	glyceraldehyde-3-phosphate metabolic process	Pre-symbiosis (24 hour)	1	1	1	AT3G47450
GO:0042822	pyridoxal phosphate metabolic process	Pre-symbiosis (24 hour)	1	1	1	AT2G46580
GO:0042823	pyridoxal phosphate biosynthetic process	Pre-symbiosis (24 hour)	1	1	1	AT2G46580
GO:0009443	pyridoxal 5'-phosphate salvage	Pre-symbiosis (24 hour)	1	1	1	AT2G46580
GO:0044255	cellular lipid metabolic process	Pre-symbiosis (24 hour)	1	1	17	AT1G27980,AT1G63970,AT1G67080,AT1G79460,AT1G80460,AT2G22530,AT2G38670,AT3G06060,AT3G06860,AT3G47450,AT4G03560,AT4G32810,AT5G03080,AT5G42650,AT5G43280,AT5G51830,AT5G58560
GO:0030258	lipid modification	Pre-symbiosis (24 hour)	1	1	1	AT3G06860
GO:0034440	lipid oxidation	Pre-symbiosis (24 hour)	1	1	1	AT3G06860
GO:0006638	neutral lipid metabolic process	Pre-symbiosis (24 hour)	1	1	3	AT1G80460,AT4G33950,AT5G03080
GO:0046460	neutral lipid biosynthetic process	Pre-symbiosis (24 hour)	1	1	2	AT4G33950,AT5G03080
GO:0044242	cellular lipid catabolic process	Pre-symbiosis (24 hour)	1	1	4	AT1G27980,AT3G06860,AT4G32810,AT5G43280
GO:0006643	membrane lipid metabolic process	Pre-symbiosis (24 hour)	1	1	3	AT1G27980,AT2G22530,AT3G06060
GO:0006664	glycolipid metabolic process	Pre-symbiosis (24 hour)	1	1	1	AT2G22530
GO:0019374	galactolipid metabolic process	Pre-symbiosis (24 hour)	1	1	1	AT3G54950
GO:0006665	sphingolipid metabolic process	Pre-symbiosis (24 hour)	1	1	2	AT1G27980,AT3G06060
GO:0046467	membrane lipid biosynthetic process	Pre-symbiosis (24 hour)	1	1	2	AT2G22530,AT3G06060
GO:0030148	sphingolipid biosynthetic process	Pre-symbiosis (24 hour)	1	1	1	AT3G06060
GO:0009247	glycolipid biosynthetic process	Pre-symbiosis (24 hour)	1	1	1	AT2G22530
GO:0046466	membrane lipid catabolic process	Pre-symbiosis (24 hour)	1	1	1	AT1G27980
GO:0030149	sphingolipid catabolic process	Pre-symbiosis (24 hour)	1	1	1	AT1G27980
GO:0046486	glycerolipid metabolic process	Pre-symbiosis (24 hour)	1	1	1	AT2G38670
GO:0006639	acylglycerol metabolic process	Pre-symbiosis (24 hour)	1	1	3	AT1G80460,AT4G33950,AT5G03080
GO:0046339	diacylglycerol metabolic process	Pre-symbiosis (24 hour)	1	1	1	AT5G03080
GO:0006641	triglyceride metabolic process	Pre-symbiosis (24 hour)	1	1	2	AT1G80460,AT4G33950
GO:0045017	glycerolipid biosynthetic process	Pre-symbiosis (24 hour)	1	1	1	AT2G38670
GO:0046463	acylglycerol biosynthetic process	Pre-symbiosis (24 hour)	1	1	2	AT4G33950,AT5G03080
GO:0019432	triglyceride biosynthetic process	Pre-symbiosis (24 hour)	1	1	1	AT4G33950
GO:0006651	diacylglycerol biosynthetic process	Pre-symbiosis (24 hour)	1	1	1	AT5G03080
GO:0006720	isoprenoid metabolic process	Pre-symbiosis (24 hour)	1	1	6	AT1G63970,AT1G67080,AT1G79460,AT3G47450,AT4G32810,AT5G58560
GO:0042214	terpene metabolic process	Pre-symbiosis (24 hour)	1	1	2	AT4G32810,AT5G23960
GO:0016119	carotene metabolic process	Pre-symbiosis (24 hour)	1	1	1	AT4G32810
GO:0051761	sesquiterpene metabolic process	Pre-symbiosis (24 hour)	1	1	1	AT5G23960
GO:0006721	terpenoid metabolic process	Pre-symbiosis (24 hour)	1	1	5	AT1G63970,AT1G67080,AT1G79460,AT4G32810,AT5G58560
GO:0016101	diterpenoid metabolic process	Pre-symbiosis (24 hour)	1	1	1	AT1G79460
GO:0009685	gibberellin metabolic process	Pre-symbiosis (24 hour)	1	1	2	AT1G68320,AT1G79460
GO:0016108	tetraterpenoid metabolic process	Pre-symbiosis (24 hour)	1	1	3	AT1G63970,AT1G67080,AT4G32810
GO:0016116	carotenoid metabolic process	Pre-symbiosis (24 hour)	1	1	3	AT1G63970,AT1G67080,AT4G32810
GO:0016122	xanthophyll metabolic process	Pre-symbiosis (24 hour)	1	1	2	AT1G67080,AT4G32810
GO:0006714	sesquiterpenoid metabolic process	Pre-symbiosis (24 hour)	1	1	4	AT1G67080,AT4G32810,AT5G23960,AT5G58560
GO:1901600	strigolactone metabolic process	Pre-symbiosis (24 hour)	1	1	1	AT4G32810
GO:0043288	apocarotenoid metabolic process	Pre-symbiosis (24 hour)	1	1	1	AT1G67080
GO:0009687	abscisic acid metabolic process	Pre-symbiosis (24 hour)	1	1	1	AT1G67080
GO:0008300	isoprenoid catabolic process	Pre-symbiosis (24 hour)	1	1	1	AT4G32810
GO:0016115	terpenoid catabolic process	Pre-symbiosis (24 hour)	1	1	1	AT4G32810
GO:0016110	tetraterpenoid catabolic process	Pre-symbiosis (24 hour)	1	1	1	AT4G32810
GO:0016118	carotenoid catabolic process	Pre-symbiosis (24 hour)	1	1	1	AT4G32810
GO:0016124	xanthophyll catabolic process	Pre-symbiosis (24 hour)	1	1	1	AT4G32810
GO:0046247	terpene catabolic process	Pre-symbiosis (24 hour)	1	1	1	AT4G32810
GO:0016121	carotene catabolic process	Pre-symbiosis (24 hour)	1	1	1	AT4G32810
GO:0016093	polyprenol metabolic process	Pre-symbiosis (24 hour)	1	1	1	AT5G58560
GO:0016487	farnesol metabolic process	Pre-symbiosis (24 hour)	1	1	1	AT5G58560
GO:0008299	isoprenoid biosynthetic process	Pre-symbiosis (24 hour)	1	1	4	AT1G63970,AT1G67080,AT1G79460,AT3G47450
GO:0043289	apocarotenoid biosynthetic process	Pre-symbiosis (24 hour)	1	1	1	AT1G67080
GO:0046246	terpene biosynthetic process	Pre-symbiosis (24 hour)	1	1	1	AT5G23960
GO:0051762	sesquiterpene biosynthetic process	Pre-symbiosis (24 hour)	1	1	1	AT5G23960
GO:0016114	terpenoid biosynthetic process	Pre-symbiosis (24 hour)	1	1	6	AT1G63970,AT1G67080,AT1G68320,AT1G79460,AT4G32810,AT5G23960
GO:0016109	tetraterpenoid biosynthetic process	Pre-symbiosis (24 hour)	1	1	1	AT1G63970
GO:0016117	carotenoid biosynthetic process	Pre-symbiosis (24 hour)	1	1	1	AT1G63970
GO:0016102	diterpenoid biosynthetic process	Pre-symbiosis (24 hour)	1	1	2	AT1G68320,AT1G79460
GO:0009686	gibberellin biosynthetic process	Pre-symbiosis (24 hour)	1	1	2	AT1G68320,AT1G79460
GO:0016106	sesquiterpenoid biosynthetic process	Pre-symbiosis (24 hour)	1	1	3	AT1G67080,AT4G32810,AT5G23960
GO:1901601	strigolactone biosynthetic process	Pre-symbiosis (24 hour)	1	1	1	AT4G32810
GO:0009688	abscisic acid biosynthetic process	Pre-symbiosis (24 hour)	1	1	1	AT1G67080
GO:0006644	phospholipid metabolic process	Pre-symbiosis (24 hour)	1	1	1	AT2G38670
GO:0046490	isopentenyl diphosphate metabolic process	Pre-symbiosis (24 hour)	1	1	1	AT3G47450
GO:0006650	glycerophospholipid metabolic process	Pre-symbiosis (24 hour)	1	1	1	AT2G38670
GO:0046488	phosphatidylinositol metabolic process	Pre-symbiosis (24 hour)	1	1	1	AT2G22530
GO:0006505	GPI anchor metabolic process	Pre-symbiosis (24 hour)	1	1	1	AT2G22530
GO:0008654	phospholipid biosynthetic process	Pre-symbiosis (24 hour)	1	1	3	AT2G22530,AT2G38670,AT3G47450
GO:0009240	isopentenyl diphosphate biosynthetic process	Pre-symbiosis (24 hour)	1	1	1	AT3G47450
GO:0019288	isopentenyl diphosphate biosynthetic process, methylerythritol 4-phosphate pathway	Pre-symbiosis (24 hour)	1	1	1	AT3G47450
GO:0046474	glycerophospholipid biosynthetic process	Pre-symbiosis (24 hour)	1	1	1	AT2G38670
GO:0006661	phosphatidylinositol biosynthetic process	Pre-symbiosis (24 hour)	1	1	1	AT2G22530
GO:0006506	GPI anchor biosynthetic process	Pre-symbiosis (24 hour)	1	1	1	AT2G22530
GO:0006631	fatty acid metabolic process	Pre-symbiosis (24 hour)	1	1	10	AT2G43710,AT3G06860,AT3G15690,AT4G03560,AT4G13050,AT4G15440,AT4G33950,AT5G42650,AT5G43280,AT5G51830
GO:0033559	unsaturated fatty acid metabolic process	Pre-symbiosis (24 hour)	1	1	3	AT2G43710,AT4G33950,AT5G42650
GO:0019372	lipoxygenase pathway	Pre-symbiosis (24 hour)	1	1	1	AT4G15440
GO:0010597	green leaf volatile biosynthetic process	Pre-symbiosis (24 hour)	1	1	1	AT4G15440
GO:0001676	long-chain fatty acid metabolic process	Pre-symbiosis (24 hour)	1	1	1	AT5G42650
GO:0019369	arachidonic acid metabolic process	Pre-symbiosis (24 hour)	1	1	1	AT5G42650
GO:0019373	epoxygenase P450 pathway	Pre-symbiosis (24 hour)	1	1	1	AT5G42650
GO:0031407	oxylipin metabolic process	Pre-symbiosis (24 hour)	1	1	1	AT5G42650
GO:0019395	fatty acid oxidation	Pre-symbiosis (24 hour)	1	1	1	AT3G06860
GO:0006633	fatty acid biosynthetic process	Pre-symbiosis (24 hour)	1	1	6	AT2G43710,AT3G15690,AT4G03560,AT4G13050,AT4G33950,AT5G51830
GO:0006636	unsaturated fatty acid biosynthetic process	Pre-symbiosis (24 hour)	1	1	2	AT2G43710,AT4G33950
GO:0009062	fatty acid catabolic process	Pre-symbiosis (24 hour)	1	1	2	AT3G06860,AT5G43280
GO:0006635	fatty acid beta-oxidation	Pre-symbiosis (24 hour)	1	1	1	AT3G06860
GO:0044262	cellular carbohydrate metabolic process	Pre-symbiosis (24 hour)	1	1	11	AT1G27440,AT1G31190,AT1G80460,AT3G08550,AT3G23920,AT3G47450,AT3G58560,AT4G04920,AT5G51460,AT5G54690,AT5G63840
GO:0005984	disaccharide metabolic process	Pre-symbiosis (24 hour)	1	1	3	AT3G58560,AT4G33950,AT5G51460
GO:0005985	sucrose metabolic process	Pre-symbiosis (24 hour)	1	1	2	AT3G58560,AT4G33950
GO:0005991	trehalose metabolic process	Pre-symbiosis (24 hour)	1	1	1	AT5G51460
GO:0019400	alditol metabolic process	Pre-symbiosis (24 hour)	1	1	1	AT1G80460
GO:0006071	glycerol metabolic process	Pre-symbiosis (24 hour)	1	1	1	AT1G80460
GO:0034637	cellular carbohydrate biosynthetic process	Pre-symbiosis (24 hour)	1	1	7	AT1G27440,AT3G08550,AT3G58560,AT4G04920,AT5G51460,AT5G54690,AT5G63840
GO:0046351	disaccharide biosynthetic process	Pre-symbiosis (24 hour)	1	1	2	AT3G58560,AT5G51460
GO:0005992	trehalose biosynthetic process	Pre-symbiosis (24 hour)	1	1	1	AT5G51460
GO:0005986	sucrose biosynthetic process	Pre-symbiosis (24 hour)	1	1	1	AT3G58560
GO:0044275	cellular carbohydrate catabolic process	Pre-symbiosis (24 hour)	1	1	2	AT1G80460,AT3G23920
GO:0019405	alditol catabolic process	Pre-symbiosis (24 hour)	1	1	1	AT1G80460
GO:0019563	glycerol catabolic process	Pre-symbiosis (24 hour)	1	1	1	AT1G80460
GO:0044264	cellular polysaccharide metabolic process	Pre-symbiosis (24 hour)	1	1	11	AT1G27440,AT1G68560,AT3G08550,AT3G23920,AT3G58560,AT4G04920,AT5G04885,AT5G41040,AT5G54690,AT5G63840,AT5G66460
GO:0044247	cellular polysaccharide catabolic process	Pre-symbiosis (24 hour)	1	1	2	AT3G23920,AT5G66460
GO:0033692	cellular polysaccharide biosynthetic process	Pre-symbiosis (24 hour)	1	1	6	AT1G27440,AT3G08550,AT3G58560,AT4G04920,AT5G54690,AT5G63840
GO:0006073	cellular glucan metabolic process	Pre-symbiosis (24 hour)	1	1	4	AT3G08550,AT3G58560,AT4G04920,AT5G63840
GO:0051273	beta-glucan metabolic process	Pre-symbiosis (24 hour)	1	1	3	AT3G08550,AT4G04920,AT5G63840
GO:0030243	cellulose metabolic process	Pre-symbiosis (24 hour)	1	1	3	AT3G08550,AT4G04920,AT5G63840
GO:0009250	glucan biosynthetic process	Pre-symbiosis (24 hour)	1	1	4	AT3G08550,AT3G58560,AT4G04920,AT5G63840
GO:0051274	beta-glucan biosynthetic process	Pre-symbiosis (24 hour)	1	1	3	AT3G08550,AT4G04920,AT5G63840
GO:0030244	cellulose biosynthetic process	Pre-symbiosis (24 hour)	1	1	3	AT3G08550,AT4G04920,AT5G63840
GO:0005982	starch metabolic process	Pre-symbiosis (24 hour)	1	1	2	AT3G23920,AT3G58560
GO:0005983	starch catabolic process	Pre-symbiosis (24 hour)	1	1	1	AT3G23920
GO:0019252	starch biosynthetic process	Pre-symbiosis (24 hour)	1	1	1	AT3G58560
GO:0010411	xyloglucan metabolic process	Pre-symbiosis (24 hour)	1	1	2	AT1G68560,AT5G04885
GO:0009969	xyloglucan biosynthetic process	Pre-symbiosis (24 hour)	1	1	1	AT5G04885
GO:0010412	mannan metabolic process	Pre-symbiosis (24 hour)	1	1	1	AT5G66460
GO:0046355	mannan catabolic process	Pre-symbiosis (24 hour)	1	1	1	AT5G66460
GO:0046838	phosphorylated carbohydrate dephosphorylation	Pre-symbiosis (24 hour)	1	1	1	AT1G31190
GO:0046855	inositol phosphate dephosphorylation	Pre-symbiosis (24 hour)	1	1	1	AT1G31190
GO:0006020	inositol metabolic process	Pre-symbiosis (24 hour)	1	1	1	AT1G31190
GO:0010035	response to inorganic substance	Pre-symbiosis (24 hour)	1	1	44	AT1G12940,AT1G18390,AT1G22770,AT1G27880,AT1G33240,AT1G64550,AT1G68560,AT1G75280,AT2G37170,AT2G37330,AT2G37770,AT2G39550,AT2G39920,AT2G41430,AT3G01860,AT3G04070,AT3G05740,AT3G09270,AT3G20390,AT3G20770,AT3G23920,AT3G28580,AT3G47450,AT4G00430,AT4G05590,AT4G19880,AT4G22790,AT4G23100,AT4G31180,AT4G31940,AT4G33950,AT4G37870,AT4G39230,AT5G13750,AT5G14420,AT5G19790,AT5G35630,AT5G36890,AT5G40010,AT5G44070…
GO:0010038	response to metal ion	Pre-symbiosis (24 hour)	1	1	21	AT1G64550,AT1G68560,AT1G75280,AT2G37330,AT2G39920,AT3G01860,AT3G09270,AT3G20390,AT3G20770,AT4G19880,AT4G23100,AT4G31180,AT4G31940,AT4G37870,AT4G39230,AT5G19790,AT5G35630,AT5G36890,AT5G44070,AT5G51830,AT5G63840
GO:0035864	response to potassium ion	Pre-symbiosis (24 hour)	1	1	1	AT5G19790
GO:0046686	response to cadmium ion	Pre-symbiosis (24 hour)	1	1	13	AT1G64550,AT2G39920,AT3G01860,AT3G09270,AT3G20390,AT4G19880,AT4G23100,AT4G31180,AT4G37870,AT5G35630,AT5G44070,AT5G51830,AT5G63840
GO:0010039	response to iron ion	Pre-symbiosis (24 hour)	1	1	1	AT3G20770
GO:0010044	response to aluminum ion	Pre-symbiosis (24 hour)	1	1	1	AT2G37330
GO:0042493	response to drug	Pre-symbiosis (24 hour)	1	1	6	AT1G15520,AT1G73700,AT2G29940,AT2G34360,AT2G37280,AT4G22790
GO:1901698	response to nitrogen compound	Pre-symbiosis (24 hour)	1	1	14	AT1G09700,AT1G12940,AT1G14790,AT1G42990,AT2G27040,AT2G29100,AT2G29120,AT3G49250,AT4G26640,AT4G35290,AT5G04290,AT5G09860,AT5G36890,AT5G56960
GO:0010167	response to nitrate	Pre-symbiosis (24 hour)	1	1	1	AT1G12940
GO:0009636	response to toxic substance	Pre-symbiosis (24 hour)	1	1	4	AT1G74590,AT1G80460,AT3G09270,AT4G01070
GO:0010188	response to microbial phytotoxin	Pre-symbiosis (24 hour)	1	1	1	AT1G80460
GO:0046685	response to arsenic-containing substance	Pre-symbiosis (24 hour)	1	1	2	AT4G18910,AT5G44070
GO:0033993	response to lipid	Pre-symbiosis (24 hour)	1	1	39	AT1G04120,AT1G09700,AT1G12420,AT1G18390,AT1G50420,AT1G62810,AT1G63500,AT1G68360,AT1G79460,AT1G80080,AT2G22370,AT2G26040,AT2G26980,AT2G30470,AT2G31500,AT2G33540,AT2G37170,AT2G38280,AT2G39550,AT2G45200,AT2G45660,AT3G08550,AT3G17980,AT3G28580,AT3G56850,AT4G04020,AT4G09600,AT4G13510,AT4G19810,AT4G33950,AT4G35890,AT5G13170,AT5G40010,AT5G44120,AT5G50720,AT5G58220,AT5G58560,AT5G63320,AT5G66880
GO:0034097	response to cytokine	Pre-symbiosis (24 hour)	1	1	1	AT5G25220
GO:0014070	response to organic cyclic compound	Pre-symbiosis (24 hour)	1	1	23	AT1G09700,AT1G14790,AT1G15520,AT1G21270,AT1G63500,AT1G68320,AT1G79680,AT2G06010,AT2G14580,AT2G17520,AT2G27040,AT2G43710,AT3G49250,AT3G50930,AT3G51550,AT4G19040,AT4G35890,AT5G04290,AT5G09860,AT5G13170,AT5G47010,AT5G54610,AT5G58220
GO:0043331	response to dsRNA	Pre-symbiosis (24 hour)	1	1	6	AT1G09700,AT1G14790,AT2G27040,AT3G49250,AT5G04290,AT5G09860
GO:0009751	response to salicylic acid	Pre-symbiosis (24 hour)	1	1	15	AT1G14790,AT1G15520,AT1G21270,AT1G68320,AT1G79680,AT2G06010,AT2G14580,AT2G17520,AT2G43710,AT3G50930,AT4G19040,AT4G35890,AT5G13170,AT5G47010,AT5G54610
GO:0097305	response to alcohol	Pre-symbiosis (24 hour)	1	1	32	AT1G04120,AT1G09700,AT1G12420,AT1G18390,AT1G62810,AT1G80080,AT2G22370,AT2G26040,AT2G26980,AT2G30470,AT2G31500,AT2G33540,AT2G37170,AT2G38280,AT2G39550,AT2G45200,AT3G08550,AT3G17980,AT3G28580,AT3G56850,AT4G04020,AT4G13510,AT4G19810,AT4G33950,AT4G35890,AT5G13170,AT5G40010,AT5G44120,AT5G50720,AT5G58560,AT5G63320,AT5G66880
GO:0010243	response to organonitrogen compound	Pre-symbiosis (24 hour)	1	1	1	AT1G42990
GO:0010200	response to chitin	Pre-symbiosis (24 hour)	1	1	1	AT1G42990
GO:0043200	response to amino acid	Pre-symbiosis (24 hour)	1	1	5	AT2G29100,AT2G29120,AT4G26640,AT4G35290,AT5G48400
GO:0009961	response to 1-aminocyclopropane-1-carboxylic acid	Pre-symbiosis (24 hour)	1	1	1	AT4G26640
GO:0009743	response to carbohydrate	Pre-symbiosis (24 hour)	1	1	2	AT3G08550,AT3G20770
GO:0034284	response to monosaccharide	Pre-symbiosis (24 hour)	1	1	2	AT3G08550,AT3G47340
GO:0009746	response to hexose	Pre-symbiosis (24 hour)	1	1	2	AT3G08550,AT3G47340
GO:0009750	response to fructose	Pre-symbiosis (24 hour)	1	1	1	AT3G47340
GO:0009749	response to glucose	Pre-symbiosis (24 hour)	1	1	2	AT3G08550,AT3G47340
GO:0034285	response to disaccharide	Pre-symbiosis (24 hour)	1	1	1	AT3G47340
GO:0009744	response to sucrose	Pre-symbiosis (24 hour)	1	1	1	AT3G47340
GO:0010037	response to carbon dioxide	Pre-symbiosis (24 hour)	1	1	1	AT4G22790
GO:0009410	response to xenobiotic stimulus	Pre-symbiosis (24 hour)	1	1	1	AT4G01070
GO:0051606	detection of stimulus	Pre-symbiosis (24 hour)	1	1	4	AT1G52520,AT3G59470,AT5G20480,AT5G25220
GO:0009593	detection of chemical stimulus	Pre-symbiosis (24 hour)	1	1	1	AT5G25220
GO:0071495	cellular response to endogenous stimulus	Pre-symbiosis (24 hour)	1	1	37	AT1G04120,AT1G18390,AT1G62810,AT1G63500,AT1G68360,AT1G75500,AT1G79460,AT2G26040,AT2G26980,AT2G29100,AT2G29120,AT2G31500,AT2G33540,AT2G39550,AT2G41370,AT2G43710,AT3G07360,AT3G12380,AT3G13300,AT3G17980,AT3G20770,AT3G23240,AT3G51550,AT4G02570,AT4G04920,AT4G23980,AT4G32330,AT4G33950,AT4G35290,AT5G09860,AT5G13170,AT5G36890,AT5G44120,AT5G47010,AT5G48400,AT5G58220,AT5G66880
GO:0009726	detection of endogenous stimulus	Pre-symbiosis (24 hour)	1	1	1	AT5G25220
GO:0048545	response to steroid hormone	Pre-symbiosis (24 hour)	1	1	2	AT1G63500,AT5G58220
GO:0009720	detection of hormone stimulus	Pre-symbiosis (24 hour)	1	1	1	AT5G25220
GO:0009733	response to auxin	Pre-symbiosis (24 hour)	1	1	13	AT1G09700,AT1G75500,AT2G39550,AT2G47260,AT3G13300,AT3G55120,AT4G02570,AT4G23980,AT4G30080,AT4G32810,AT5G08640,AT5G13930,AT5G20730
GO:0009735	response to cytokinin	Pre-symbiosis (24 hour)	1	1	9	AT1G09700,AT1G16350,AT1G68360,AT1G69040,AT2G26980,AT3G12380,AT3G26040,AT5G25220,AT5G35630
GO:0009722	detection of cytokinin stimulus	Pre-symbiosis (24 hour)	1	1	1	AT5G25220
GO:0009723	response to ethylene	Pre-symbiosis (24 hour)	1	1	13	AT1G15520,AT2G14580,AT2G22370,AT3G20770,AT3G23240,AT3G51550,AT4G04920,AT4G19040,AT4G32330,AT5G09860,AT5G19790,AT5G20730,AT5G36890
GO:0009753	response to jasmonic acid	Pre-symbiosis (24 hour)	1	1	15	AT1G15520,AT2G14580,AT2G41370,AT2G43710,AT3G23240,AT3G51420,AT4G02570,AT4G04920,AT4G19810,AT4G23100,AT4G35890,AT5G07010,AT5G13930,AT5G42650,AT5G47010
GO:0009739	response to gibberellin	Pre-symbiosis (24 hour)	1	1	6	AT1G50420,AT1G68360,AT1G79460,AT2G45660,AT4G09600,AT5G66880
GO:0009741	response to brassinosteroid	Pre-symbiosis (24 hour)	1	1	3	AT1G63500,AT3G51550,AT5G58220
GO:0009737	response to abscisic acid	Pre-symbiosis (24 hour)	1	1	32	AT1G04120,AT1G09700,AT1G12420,AT1G18390,AT1G62810,AT1G80080,AT2G22370,AT2G26040,AT2G26980,AT2G30470,AT2G31500,AT2G33540,AT2G37170,AT2G38280,AT2G39550,AT2G45200,AT3G08550,AT3G17980,AT3G28580,AT3G56850,AT4G04020,AT4G13510,AT4G19810,AT4G33950,AT4G35890,AT5G13170,AT5G40010,AT5G44120,AT5G50720,AT5G58560,AT5G63320,AT5G66880
GO:0071496	cellular response to external stimulus	Pre-symbiosis (24 hour)	1	1	10	AT1G18390,AT1G33240,AT3G05740,AT3G47340,AT4G37870,AT5G03570,AT5G12200,AT5G58220,AT5G63320,AT5G64370
GO:0009581	detection of external stimulus	Pre-symbiosis (24 hour)	1	1	2	AT1G52520,AT3G59470
GO:0009606	tropism	Pre-symbiosis (24 hour)	1	1	1	AT5G13750
GO:0009991	response to extracellular stimulus	Pre-symbiosis (24 hour)	1	1	10	AT1G18390,AT1G33240,AT3G05740,AT3G47340,AT4G37870,AT5G03570,AT5G12200,AT5G58220,AT5G63320,AT5G64370
GO:0031667	response to nutrient levels	Pre-symbiosis (24 hour)	1	1	5	AT3G47340,AT4G37870,AT5G03570,AT5G12200,AT5G64370
GO:0009628	response to abiotic stimulus	Pre-symbiosis (24 hour)	1	1	36	AT1G04120,AT1G10520,AT1G15950,AT1G33240,AT1G53210,AT1G75540,AT1G80460,AT2G37170,AT2G37860,AT2G45660,AT3G04070,AT3G07650,AT3G08550,AT3G17980,AT3G18990,AT3G20770,AT3G47340,AT3G47450,AT3G50930,AT3G54610,AT4G01070,AT4G04020,AT4G04920,AT4G13510,AT4G22140,AT4G23100,AT4G24230,AT4G26840,AT4G36990,AT4G37270,AT5G08640,AT5G13750,AT5G14420,AT5G19350,AT5G25220,AT5G58003
GO:0009582	detection of abiotic stimulus	Pre-symbiosis (24 hour)	1	1	2	AT1G52520,AT3G59470
GO:0070482	response to oxygen levels	Pre-symbiosis (24 hour)	1	1	2	AT3G20770,AT4G24230
GO:0036293	response to decreased oxygen levels	Pre-symbiosis (24 hour)	1	1	2	AT3G20770,AT4G24230
GO:0009629	response to gravity	Pre-symbiosis (24 hour)	1	1	1	AT5G13750
GO:0009630	gravitropism	Pre-symbiosis (24 hour)	1	1	1	AT5G13750
GO:0009959	negative gravitropism	Pre-symbiosis (24 hour)	1	1	1	AT5G46860
GO:0009314	response to radiation	Pre-symbiosis (24 hour)	1	1	7	AT1G10520,AT3G07650,AT3G08550,AT3G50930,AT4G04920,AT4G24230,AT4G37270
GO:0009416	response to light stimulus	Pre-symbiosis (24 hour)	1	1	7	AT1G10520,AT3G07650,AT3G08550,AT3G50930,AT4G04920,AT4G24230,AT4G37270
GO:0009642	response to light intensity	Pre-symbiosis (24 hour)	1	1	4	AT3G47340,AT4G04020,AT4G24230,AT4G37270
GO:0009644	response to high light intensity	Pre-symbiosis (24 hour)	1	1	3	AT2G41430,AT4G04020,AT4G34190
GO:0009646	response to absence of light	Pre-symbiosis (24 hour)	1	1	2	AT3G47340,AT4G24230
GO:0009639	response to red or far red light	Pre-symbiosis (24 hour)	1	1	3	AT1G22770,AT1G75540,AT3G59470
GO:0009641	shade avoidance	Pre-symbiosis (24 hour)	1	1	1	AT1G75540
GO:0010218	response to far red light	Pre-symbiosis (24 hour)	1	1	3	AT1G22770,AT1G52520,AT3G59470
GO:0009637	response to blue light	Pre-symbiosis (24 hour)	1	1	3	AT1G22770,AT5G20610,AT5G20730
GO:0009638	phototropism	Pre-symbiosis (24 hour)	1	1	1	AT5G20730
GO:0009411	response to UV	Pre-symbiosis (24 hour)	1	1	2	AT1G10520,AT3G50930
GO:0070141	response to UV-A	Pre-symbiosis (24 hour)	1	1	1	AT4G34190
GO:0010224	response to UV-B	Pre-symbiosis (24 hour)	1	1	1	AT1G10520
GO:0009648	photoperiodism	Pre-symbiosis (24 hour)	1	1	9	AT1G18390,AT1G22770,AT1G67580,AT2G22370,AT2G37860,AT3G07650,AT4G04920,AT4G22140,AT5G47010
GO:0009583	detection of light stimulus	Pre-symbiosis (24 hour)	1	1	2	AT1G52520,AT3G59470
GO:0010212	response to ionizing radiation	Pre-symbiosis (24 hour)	1	1	1	AT3G22880
GO:0080167	response to karrikin	Pre-symbiosis (24 hour)	1	1	10	AT1G22770,AT1G80460,AT2G26250,AT2G41040,AT3G53260,AT3G55120,AT4G13510,AT5G08640,AT5G13750,AT5G40780
GO:0009266	response to temperature stimulus	Pre-symbiosis (24 hour)	1	1	22	AT1G15950,AT1G22770,AT1G49480,AT2G17690,AT2G22370,AT2G26250,AT2G37770,AT2G45660,AT3G05740,AT3G17880,AT3G18990,AT3G20740,AT4G04020,AT4G23100,AT4G26840,AT4G36990,AT5G15450,AT5G19350,AT5G21160,AT5G40010,AT5G50720,AT5G63320
GO:0009415	response to water	Pre-symbiosis (24 hour)	1	1	2	AT1G33240,AT5G13750
GO:0035966	response to topologically incorrect protein	Pre-symbiosis (24 hour)	1	1	1	AT1G42990
GO:0006986	response to unfolded protein	Pre-symbiosis (24 hour)	1	1	1	AT1G42990
GO:0009611	response to wounding	Pre-symbiosis (24 hour)	1	1	12	AT1G72920,AT2G14580,AT3G24550,AT3G51420,AT3G54420,AT4G15440,AT4G26640,AT4G34190,AT5G13930,AT5G42650,AT5G47010,AT5G63450
GO:0006979	response to oxidative stress	Pre-symbiosis (24 hour)	1	1	1	AT3G14430
GO:0000302	response to reactive oxygen species	Pre-symbiosis (24 hour)	1	1	5	AT1G22770,AT2G37860,AT3G28580,AT3G47450,AT4G23100
GO:0042542	response to hydrogen peroxide	Pre-symbiosis (24 hour)	1	1	1	AT1G22770
GO:0000304	response to singlet oxygen	Pre-symbiosis (24 hour)	1	1	1	AT3G28580
GO:0071731	response to nitric oxide	Pre-symbiosis (24 hour)	1	1	1	AT5G36890
GO:0010193	response to ozone	Pre-symbiosis (24 hour)	1	1	2	AT3G47450,AT4G23100
GO:0002213	defense response to insect	Pre-symbiosis (24 hour)	1	1	3	AT2G43710,AT4G23100,AT5G14180
GO:0006970	response to osmotic stress	Pre-symbiosis (24 hour)	1	1	4	AT1G04120,AT1G53210,AT3G17980,AT4G04920
GO:0006972	hyperosmotic response	Pre-symbiosis (24 hour)	1	1	1	AT5G50720
GO:0009651	response to salt stress	Pre-symbiosis (24 hour)	1	1	5	AT1G04120,AT1G53210,AT3G17980,AT4G01070,AT5G58003
GO:0042538	hyperosmotic salinity response	Pre-symbiosis (24 hour)	1	1	1	AT5G50720
GO:0009409	response to cold	Pre-symbiosis (24 hour)	1	1	12	AT1G15950,AT1G22770,AT1G49480,AT2G22370,AT2G26250,AT2G37770,AT2G45660,AT3G05740,AT3G18990,AT4G04020,AT5G50720,AT5G63320
GO:0010048	vernalization response	Pre-symbiosis (24 hour)	1	1	2	AT2G22370,AT3G18990
GO:0009408	response to heat	Pre-symbiosis (24 hour)	1	1	4	AT4G23100,AT4G26840,AT4G36990,AT5G19350
GO:0010286	heat acclimation	Pre-symbiosis (24 hour)	1	1	3	AT3G17880,AT4G26840,AT5G21160
GO:0042594	response to starvation	Pre-symbiosis (24 hour)	1	1	3	AT3G47340,AT4G37870,AT5G03570
GO:0001666	response to hypoxia	Pre-symbiosis (24 hour)	1	1	2	AT3G20770,AT4G24230
GO:0009413	response to flooding	Pre-symbiosis (24 hour)	1	1	1	AT3G04070
GO:0009414	response to water deprivation	Pre-symbiosis (24 hour)	1	1	2	AT1G33240,AT5G13750
GO:0009595	detection of biotic stimulus	Pre-symbiosis (24 hour)	1	1	1	AT5G20480
GO:0098581	detection of external biotic stimulus	Pre-symbiosis (24 hour)	1	1	1	AT5G20480
GO:0104004	cellular response to environmental stimulus	Pre-symbiosis (24 hour)	1	1	13	AT1G18390,AT1G27880,AT1G33240,AT1G52520,AT1G53210,AT1G67580,AT3G05740,AT3G08550,AT3G59470,AT4G34190,AT4G35580,AT5G13170,AT5G20730
GO:0071214	cellular response to abiotic stimulus	Pre-symbiosis (24 hour)	1	1	13	AT1G18390,AT1G27880,AT1G33240,AT1G52520,AT1G53210,AT1G67580,AT3G05740,AT3G08550,AT3G59470,AT4G34190,AT4G35580,AT5G13170,AT5G20730
GO:0071478	cellular response to radiation	Pre-symbiosis (24 hour)	1	1	4	AT3G08550,AT3G59470,AT4G34190,AT5G20730
GO:0071482	cellular response to light stimulus	Pre-symbiosis (24 hour)	1	1	4	AT3G08550,AT3G59470,AT4G34190,AT5G20730
GO:0071489	cellular response to red or far red light	Pre-symbiosis (24 hour)	1	1	2	AT1G52520,AT3G59470
GO:0071490	cellular response to far red light	Pre-symbiosis (24 hour)	1	1	2	AT1G52520,AT3G59470
GO:0071483	cellular response to blue light	Pre-symbiosis (24 hour)	1	1	1	AT5G20730
GO:0034644	cellular response to UV	Pre-symbiosis (24 hour)	1	1	1	AT4G34190
GO:0071492	cellular response to UV-A	Pre-symbiosis (24 hour)	1	1	1	AT4G34190
GO:0071484	cellular response to light intensity	Pre-symbiosis (24 hour)	1	1	1	AT4G34190
GO:0071486	cellular response to high light intensity	Pre-symbiosis (24 hour)	1	1	1	AT4G34190
GO:0070887	cellular response to chemical stimulus	Pre-symbiosis (24 hour)	1	1	16	AT1G04120,AT1G12940,AT1G14790,AT1G31170,AT1G33240,AT1G42990,AT2G13600,AT2G41370,AT3G12380,AT3G13300,AT3G17980,AT3G20770,AT3G50930,AT4G01070,AT4G04920,AT4G23980
GO:0071241	cellular response to inorganic substance	Pre-symbiosis (24 hour)	1	1	6	AT1G12940,AT3G20770,AT4G22790,AT4G31940,AT5G19790,AT5G36890
GO:0071248	cellular response to metal ion	Pre-symbiosis (24 hour)	1	1	4	AT3G20770,AT4G31940,AT5G19790,AT5G36890
GO:0035865	cellular response to potassium ion	Pre-symbiosis (24 hour)	1	1	1	AT5G19790
GO:0071281	cellular response to iron ion	Pre-symbiosis (24 hour)	1	1	1	AT3G20770
GO:1901701	cellular response to oxygen-containing compound	Pre-symbiosis (24 hour)	1	1	38	AT1G04120,AT1G12940,AT1G18390,AT1G27880,AT1G33240,AT1G62810,AT1G63500,AT1G68360,AT1G79460,AT2G13600,AT2G26040,AT2G26980,AT2G29100,AT2G29120,AT2G31500,AT2G33540,AT2G39550,AT2G41370,AT2G43710,AT3G05740,AT3G07360,AT3G17980,AT3G20770,AT3G23240,AT3G50930,AT3G51550,AT4G02570,AT4G04920,AT4G22790,AT4G33950,AT4G35290,AT5G13170,AT5G36890,AT5G44120,AT5G47010,AT5G48400,AT5G58220,AT5G66880
GO:0071244	cellular response to carbon dioxide	Pre-symbiosis (24 hour)	1	1	1	AT4G22790
GO:0071462	cellular response to water stimulus	Pre-symbiosis (24 hour)	1	1	3	AT1G18390,AT1G33240,AT3G05740
GO:0071310	cellular response to organic substance	Pre-symbiosis (24 hour)	1	1	47	AT1G04120,AT1G09700,AT1G14790,AT1G18390,AT1G42990,AT1G62810,AT1G63500,AT1G68360,AT1G75500,AT1G79460,AT2G13600,AT2G17520,AT2G26040,AT2G26980,AT2G27040,AT2G29100,AT2G29120,AT2G31500,AT2G33540,AT2G39550,AT2G41370,AT2G43710,AT3G07360,AT3G12380,AT3G13300,AT3G17980,AT3G20770,AT3G23240,AT3G49250,AT3G50930,AT3G51550,AT4G02570,AT4G04920,AT4G23980,AT4G32330,AT4G33950,AT4G35290,AT5G04290,AT5G09860,AT5G13170…
GO:0071407	cellular response to organic cyclic compound	Pre-symbiosis (24 hour)	1	1	12	AT1G09700,AT1G14790,AT1G63500,AT2G27040,AT2G43710,AT3G49250,AT3G50930,AT5G04290,AT5G09860,AT5G13170,AT5G47010,AT5G58220
GO:0071446	cellular response to salicylic acid stimulus	Pre-symbiosis (24 hour)	1	1	1	AT3G50930
GO:0071396	cellular response to lipid	Pre-symbiosis (24 hour)	1	1	19	AT1G04120,AT1G18390,AT1G62810,AT1G63500,AT1G68360,AT1G79460,AT2G26040,AT2G26980,AT2G31500,AT2G33540,AT2G39550,AT3G07360,AT3G17980,AT3G51550,AT4G33950,AT5G13170,AT5G44120,AT5G58220,AT5G66880
GO:0097306	cellular response to alcohol	Pre-symbiosis (24 hour)	1	1	15	AT1G04120,AT1G18390,AT1G62810,AT2G26040,AT2G26980,AT2G31500,AT2G33540,AT2G39550,AT3G07360,AT3G17980,AT3G51550,AT4G33950,AT5G13170,AT5G44120,AT5G66880
GO:0032870	cellular response to hormone stimulus	Pre-symbiosis (24 hour)	1	1	32	AT1G04120,AT1G18390,AT1G62810,AT1G63500,AT1G68360,AT1G75500,AT1G79460,AT2G26040,AT2G26980,AT2G31500,AT2G33540,AT2G39550,AT2G41370,AT2G43710,AT3G07360,AT3G12380,AT3G13300,AT3G17980,AT3G20770,AT3G23240,AT4G02570,AT4G04920,AT4G23980,AT4G32330,AT4G33950,AT5G09860,AT5G13170,AT5G36890,AT5G44120,AT5G47010,AT5G58220,AT5G66880
GO:0071383	cellular response to steroid hormone stimulus	Pre-symbiosis (24 hour)	1	1	2	AT1G63500,AT5G58220
GO:0071365	cellular response to auxin stimulus	Pre-symbiosis (24 hour)	1	1	2	AT3G13300,AT4G23980
GO:0071368	cellular response to cytokinin stimulus	Pre-symbiosis (24 hour)	1	1	1	AT3G12380
GO:0071369	cellular response to ethylene stimulus	Pre-symbiosis (24 hour)	1	1	2	AT3G20770,AT4G04920
GO:0071395	cellular response to jasmonic acid stimulus	Pre-symbiosis (24 hour)	1	1	2	AT2G41370,AT4G04920
GO:0071367	cellular response to brassinosteroid stimulus	Pre-symbiosis (24 hour)	1	1	2	AT1G63500,AT5G58220
GO:0071370	cellular response to gibberellin stimulus	Pre-symbiosis (24 hour)	1	1	2	AT1G68360,AT1G79460
GO:0071215	cellular response to abscisic acid stimulus	Pre-symbiosis (24 hour)	1	1	15	AT1G04120,AT1G18390,AT1G62810,AT2G26040,AT2G26980,AT2G31500,AT2G33540,AT2G39550,AT3G07360,AT3G17980,AT3G51550,AT4G33950,AT5G13170,AT5G44120,AT5G66880
GO:0071322	cellular response to carbohydrate stimulus	Pre-symbiosis (24 hour)	1	1	2	AT2G13600,AT3G20770
GO:0071345	cellular response to cytokine stimulus	Pre-symbiosis (24 hour)	1	1	1	AT5G25220
GO:0071466	cellular response to xenobiotic stimulus	Pre-symbiosis (24 hour)	1	1	1	AT4G01070
GO:0006805	xenobiotic metabolic process	Pre-symbiosis (24 hour)	1	1	1	AT4G01070
GO:0042178	xenobiotic catabolic process	Pre-symbiosis (24 hour)	1	1	1	AT4G01070
GO:1901699	cellular response to nitrogen compound	Pre-symbiosis (24 hour)	1	1	12	AT1G09700,AT1G12940,AT1G14790,AT2G27040,AT2G29100,AT2G29120,AT3G49250,AT4G35290,AT5G04290,AT5G09860,AT5G36890,AT5G48400
GO:1902170	cellular response to reactive nitrogen species	Pre-symbiosis (24 hour)	1	1	1	AT1G12940
GO:0071249	cellular response to nitrate	Pre-symbiosis (24 hour)	1	1	1	AT1G12940
GO:0071359	cellular response to dsRNA	Pre-symbiosis (24 hour)	1	1	6	AT1G09700,AT1G14790,AT2G27040,AT3G49250,AT5G04290,AT5G09860
GO:0031050	dsRNA fragmentation	Pre-symbiosis (24 hour)	1	1	6	AT1G09700,AT1G14790,AT2G27040,AT3G49250,AT5G04290,AT5G09860
GO:0071417	cellular response to organonitrogen compound	Pre-symbiosis (24 hour)	1	1	4	AT2G29100,AT2G29120,AT4G35290,AT5G48400
GO:0071230	cellular response to amino acid stimulus	Pre-symbiosis (24 hour)	1	1	4	AT2G29100,AT2G29120,AT4G35290,AT5G48400
GO:0033554	cellular response to stress	Pre-symbiosis (24 hour)	1	1	9	AT1G07960,AT1G10520,AT1G31170,AT1G33240,AT1G42990,AT1G53210,AT3G14470,AT3G50930,AT5G56950
GO:0035967	cellular response to topologically incorrect protein	Pre-symbiosis (24 hour)	1	1	1	AT1G42990
GO:0034620	cellular response to unfolded protein	Pre-symbiosis (24 hour)	1	1	2	AT1G42990,AT2G17520
GO:0006974	cellular response to DNA damage stimulus	Pre-symbiosis (24 hour)	1	1	2	AT1G10520,AT5G56950
GO:0006281	DNA repair	Pre-symbiosis (24 hour)	1	1	2	AT1G10520,AT5G56950
GO:0000726	non-recombinational repair	Pre-symbiosis (24 hour)	1	1	1	AT1G10520
GO:0006284	base-excision repair	Pre-symbiosis (24 hour)	1	1	2	AT1G27880,AT1G75230
GO:0006285	base-excision repair, AP site formation	Pre-symbiosis (24 hour)	1	1	1	AT1G75230
GO:0006289	nucleotide-excision repair	Pre-symbiosis (24 hour)	1	1	1	AT1G10520
GO:0006302	double-strand break repair	Pre-symbiosis (24 hour)	1	1	2	AT1G10520,AT5G56950
GO:0006303	double-strand break repair via nonhomologous end joining	Pre-symbiosis (24 hour)	1	1	1	AT1G10520
GO:0000725	recombinational repair	Pre-symbiosis (24 hour)	1	1	6	AT1G27880,AT2G17690,AT3G05740,AT3G22880,AT4G31400,AT5G56950
GO:0000724	double-strand break repair via homologous recombination	Pre-symbiosis (24 hour)	1	1	6	AT1G27880,AT2G17690,AT3G05740,AT3G22880,AT4G31400,AT5G56950
GO:0045003	double-strand break repair via synthesis-dependent strand annealing	Pre-symbiosis (24 hour)	1	1	1	AT3G22880
GO:0006307	DNA dealkylation involved in DNA repair	Pre-symbiosis (24 hour)	1	1	1	AT1G75230
GO:0034976	response to endoplasmic reticulum stress	Pre-symbiosis (24 hour)	1	1	2	AT1G07960,AT1G42990
GO:0034605	cellular response to heat	Pre-symbiosis (24 hour)	1	1	2	AT5G19350,AT5G21160
GO:0070370	cellular heat acclimation	Pre-symbiosis (24 hour)	1	1	1	AT5G21160
GO:0034599	cellular response to oxidative stress	Pre-symbiosis (24 hour)	1	1	1	AT1G31170
GO:0034614	cellular response to reactive oxygen species	Pre-symbiosis (24 hour)	1	1	1	AT5G36890
GO:0071732	cellular response to nitric oxide	Pre-symbiosis (24 hour)	1	1	1	AT5G36890
GO:0070417	cellular response to cold	Pre-symbiosis (24 hour)	1	1	1	AT3G05740
GO:0071470	cellular response to osmotic stress	Pre-symbiosis (24 hour)	1	1	4	AT1G53210,AT1G67580,AT4G35580,AT5G13170
GO:0071472	cellular response to salt stress	Pre-symbiosis (24 hour)	1	1	1	AT1G53210
GO:0031668	cellular response to extracellular stimulus	Pre-symbiosis (24 hour)	1	1	10	AT1G18390,AT1G33240,AT3G05740,AT3G47340,AT4G37870,AT5G03570,AT5G12200,AT5G58220,AT5G63320,AT5G64370
GO:0031669	cellular response to nutrient levels	Pre-symbiosis (24 hour)	1	1	5	AT3G47340,AT4G37870,AT5G03570,AT5G12200,AT5G64370
GO:0043562	cellular response to nitrogen levels	Pre-symbiosis (24 hour)	1	1	2	AT5G12200,AT5G64370
GO:0009267	cellular response to starvation	Pre-symbiosis (24 hour)	1	1	3	AT3G47340,AT4G37870,AT5G03570
GO:0051365	cellular response to potassium ion starvation	Pre-symbiosis (24 hour)	1	1	1	AT5G63320
GO:0010106	cellular response to iron ion starvation	Pre-symbiosis (24 hour)	1	1	1	AT5G03570
GO:0016036	cellular response to phosphate starvation	Pre-symbiosis (24 hour)	1	1	1	AT4G37870
GO:0043617	cellular response to sucrose starvation	Pre-symbiosis (24 hour)	1	1	1	AT3G47340
GO:0042631	cellular response to water deprivation	Pre-symbiosis (24 hour)	1	1	3	AT1G18390,AT1G33240,AT3G05740
GO:0009626	plant-type hypersensitive response	Pre-symbiosis (24 hour)	1	1	2	AT3G14470,AT3G50930
GO:0051179	localization	Pre-symbiosis (24 hour)	1	1	97	AT1G01490,AT1G04120,AT1G09070,AT1G11060,AT1G12940,AT1G15520,AT1G21170,AT1G25530,AT1G26170,AT1G29420,AT1G29450,AT1G31260,AT1G44750,AT1G47670,AT1G49480,AT1G51160,AT1G52360,AT1G54710,AT1G54730,AT1G55910,AT1G65730,AT1G73190,AT1G73700,AT1G74240,AT1G75500,AT1G77380,AT2G13620,AT2G19950,AT2G21600,AT2G26570,AT2G29100,AT2G29120,AT2G29530,AT2G29940,AT2G30710,AT2G31500,AT2G34360,AT2G37170,AT2G37280,AT2G39130…
GO:0033036	macromolecule localization	Pre-symbiosis (24 hour)	1	1	1	AT1G09070
GO:0010876	lipid localization	Pre-symbiosis (24 hour)	1	1	1	AT4G24230
GO:0033037	polysaccharide localization	Pre-symbiosis (24 hour)	1	1	3	AT3G07160,AT4G23100,AT5G44070
GO:0052545	callose localization	Pre-symbiosis (24 hour)	1	1	3	AT3G07160,AT4G23100,AT5G44070
GO:0052542	defense response by callose deposition	Pre-symbiosis (24 hour)	1	1	2	AT4G23100,AT5G44070
GO:0006403	RNA localization	Pre-symbiosis (24 hour)	1	1	2	AT2G41620,AT3G27100
GO:0008104	protein localization	Pre-symbiosis (24 hour)	1	1	1	AT1G09070
GO:0031503	protein complex localization	Pre-symbiosis (24 hour)	1	1	1	AT3G19990
GO:0051236	establishment of RNA localization	Pre-symbiosis (24 hour)	1	1	2	AT2G41620,AT3G27100
GO:0098657	import into cell	Pre-symbiosis (24 hour)	1	1	1	AT3G05030
GO:0071702	organic substance transport	Pre-symbiosis (24 hour)	1	1	1	AT1G09070
GO:0015748	organophosphate ester transport	Pre-symbiosis (24 hour)	1	1	1	AT4G28390
GO:0015849	organic acid transport	Pre-symbiosis (24 hour)	1	1	8	AT1G25530,AT1G47670,AT1G77380,AT2G39130,AT3G30390,AT4G05590,AT4G24230,AT5G40780
GO:0008643	carbohydrate transport	Pre-symbiosis (24 hour)	1	1	4	AT1G54730,AT3G18830,AT5G13170,AT5G23660
GO:0015772	oligosaccharide transport	Pre-symbiosis (24 hour)	1	1	2	AT5G13170,AT5G23660
GO:0015766	disaccharide transport	Pre-symbiosis (24 hour)	1	1	2	AT5G13170,AT5G23660
GO:0015770	sucrose transport	Pre-symbiosis (24 hour)	1	1	2	AT5G13170,AT5G23660
GO:0015749	monosaccharide transport	Pre-symbiosis (24 hour)	1	1	2	AT1G54730,AT3G18830
GO:0008645	hexose transport	Pre-symbiosis (24 hour)	1	1	2	AT1G54730,AT3G18830
GO:0015758	glucose transport	Pre-symbiosis (24 hour)	1	1	2	AT1G54730,AT3G18830
GO:0046323	glucose import	Pre-symbiosis (24 hour)	1	1	2	AT1G54730,AT3G18830
GO:0015850	organic hydroxy compound transport	Pre-symbiosis (24 hour)	1	1	1	AT1G15520
GO:0006869	lipid transport	Pre-symbiosis (24 hour)	1	1	1	AT4G24230
GO:0046864	isoprenoid transport	Pre-symbiosis (24 hour)	1	1	1	AT1G15520
GO:0046865	terpenoid transport	Pre-symbiosis (24 hour)	1	1	1	AT1G15520
GO:1901998	toxin transport	Pre-symbiosis (24 hour)	1	1	1	AT3G59280
GO:0046903	secretion	Pre-symbiosis (24 hour)	1	1	2	AT1G21170,AT5G41950
GO:0032940	secretion by cell	Pre-symbiosis (24 hour)	1	1	2	AT1G21170,AT5G41950
GO:0006818	hydrogen transport	Pre-symbiosis (24 hour)	1	1	1	ATMG01360
GO:0042044	fluid transport	Pre-symbiosis (24 hour)	1	1	2	AT2G37170,AT3G54820
GO:0006833	water transport	Pre-symbiosis (24 hour)	1	1	2	AT2G37170,AT3G54820
GO:0099111	microtubule-based transport	Pre-symbiosis (24 hour)	1	1	2	AT3G19990,AT5G20110
GO:0098739	import across plasma membrane	Pre-symbiosis (24 hour)	1	1	1	AT3G05030
GO:1903825	organic acid transmembrane transport	Pre-symbiosis (24 hour)	1	1	6	AT1G25530,AT1G47670,AT1G77380,AT2G39130,AT3G30390,AT4G05590
GO:0080170	hydrogen peroxide transmembrane transport	Pre-symbiosis (24 hour)	1	1	1	AT4G18910
GO:0034219	carbohydrate transmembrane transport	Pre-symbiosis (24 hour)	1	1	1	AT1G54730
GO:1905950	monosaccharide transmembrane transport	Pre-symbiosis (24 hour)	1	1	1	AT1G54730
GO:0035428	hexose transmembrane transport	Pre-symbiosis (24 hour)	1	1	1	AT1G54730
GO:0071705	nitrogen compound transport	Pre-symbiosis (24 hour)	1	1	1	AT1G09070
GO:0042886	amide transport	Pre-symbiosis (24 hour)	1	1	1	AT1G09070
GO:0015833	peptide transport	Pre-symbiosis (24 hour)	1	1	1	AT1G09070
GO:0015931	nucleobase-containing compound transport	Pre-symbiosis (24 hour)	1	1	3	AT2G41620,AT3G27100,AT4G28390
GO:0050657	nucleic acid transport	Pre-symbiosis (24 hour)	1	1	2	AT2G41620,AT3G27100
GO:0050658	RNA transport	Pre-symbiosis (24 hour)	1	1	2	AT2G41620,AT3G27100
GO:0051028	mRNA transport	Pre-symbiosis (24 hour)	1	1	2	AT2G41620,AT3G27100
GO:0006862	nucleotide transport	Pre-symbiosis (24 hour)	1	1	1	AT4G28390
GO:0015865	purine nucleotide transport	Pre-symbiosis (24 hour)	1	1	1	AT4G28390
GO:0015851	nucleobase transport	Pre-symbiosis (24 hour)	1	1	2	AT1G44750,AT3G10960
GO:0006863	purine nucleobase transport	Pre-symbiosis (24 hour)	1	1	2	AT1G44750,AT3G10960
GO:0015854	guanine transport	Pre-symbiosis (24 hour)	1	1	1	AT3G10960
GO:0015853	adenine transport	Pre-symbiosis (24 hour)	1	1	1	AT3G10960
GO:0006812	cation transport	Pre-symbiosis (24 hour)	1	1	22	AT1G01490,AT1G15520,AT1G31260,AT1G55910,AT2G13620,AT2G29100,AT2G29120,AT2G31500,AT3G05030,AT3G06130,AT3G44900,AT4G03560,AT4G05590,AT4G13510,AT4G16380,AT4G33520,AT4G35290,AT5G02600,AT5G03570,AT5G48400,AT5G62000,ATMG01360
GO:0072511	divalent inorganic cation transport	Pre-symbiosis (24 hour)	1	1	8	AT1G31260,AT1G55910,AT2G29100,AT2G29120,AT4G03560,AT4G35290,AT5G03570,AT5G48400
GO:0015672	monovalent inorganic cation transport	Pre-symbiosis (24 hour)	1	1	1	AT3G05030
GO:0015992	proton transport	Pre-symbiosis (24 hour)	1	1	1	ATMG01360
GO:0030001	metal ion transport	Pre-symbiosis (24 hour)	1	1	18	AT1G01490,AT1G15520,AT1G31260,AT1G55910,AT2G29100,AT2G29120,AT2G31500,AT3G05030,AT3G06130,AT4G03560,AT4G05590,AT4G16380,AT4G33520,AT4G35290,AT5G02600,AT5G03570,AT5G48400,AT5G62000
GO:0070838	divalent metal ion transport	Pre-symbiosis (24 hour)	1	1	7	AT1G31260,AT1G55910,AT2G29100,AT2G29120,AT4G03560,AT4G35290,AT5G48400
GO:0006816	calcium ion transport	Pre-symbiosis (24 hour)	1	1	5	AT2G29100,AT2G29120,AT4G03560,AT4G35290,AT5G48400
GO:0015692	lead ion transport	Pre-symbiosis (24 hour)	1	1	1	AT1G15520
GO:0000041	transition metal ion transport	Pre-symbiosis (24 hour)	1	1	4	AT1G31260,AT1G55910,AT4G33520,AT5G03570
GO:0006826	iron ion transport	Pre-symbiosis (24 hour)	1	1	1	AT5G03570
GO:0006825	copper ion transport	Pre-symbiosis (24 hour)	1	1	1	AT4G33520
GO:0015675	nickel cation transport	Pre-symbiosis (24 hour)	1	1	1	AT5G03570
GO:0006824	cobalt ion transport	Pre-symbiosis (24 hour)	1	1	1	AT5G03570
GO:0006829	zinc II ion transport	Pre-symbiosis (24 hour)	1	1	2	AT1G31260,AT1G55910
GO:0006814	sodium ion transport	Pre-symbiosis (24 hour)	1	1	1	AT3G05030
GO:0006813	potassium ion transport	Pre-symbiosis (24 hour)	1	1	1	AT3G05030
GO:0071804	cellular potassium ion transport	Pre-symbiosis (24 hour)	1	1	4	AT2G31500,AT3G05030,AT4G05590,AT5G62000
GO:0015696	ammonium transport	Pre-symbiosis (24 hour)	1	1	1	AT4G13510
GO:0015695	organic cation transport	Pre-symbiosis (24 hour)	1	1	1	AT4G13510
GO:0006820	anion transport	Pre-symbiosis (24 hour)	1	1	16	AT1G12940,AT1G15520,AT1G25530,AT1G47670,AT1G77380,AT2G39130,AT2G41705,AT3G26570,AT3G30390,AT4G05590,AT4G18910,AT4G24230,AT4G33950,AT5G20480,AT5G40780,AT5G44070
GO:0015698	inorganic anion transport	Pre-symbiosis (24 hour)	1	1	4	AT1G12940,AT2G41705,AT3G26570,AT5G44070
GO:0006817	phosphate ion transport	Pre-symbiosis (24 hour)	1	1	1	AT3G26570
GO:0015700	arsenite transport	Pre-symbiosis (24 hour)	1	1	2	AT4G18910,AT5G44070
GO:0015706	nitrate transport	Pre-symbiosis (24 hour)	1	1	1	AT1G12940
GO:0015711	organic anion transport	Pre-symbiosis (24 hour)	1	1	8	AT1G25530,AT1G47670,AT1G77380,AT2G39130,AT3G30390,AT4G05590,AT4G24230,AT5G40780
GO:0046942	carboxylic acid transport	Pre-symbiosis (24 hour)	1	1	8	AT1G25530,AT1G47670,AT1G77380,AT2G39130,AT3G30390,AT4G05590,AT4G24230,AT5G40780
GO:0015718	monocarboxylic acid transport	Pre-symbiosis (24 hour)	1	1	3	AT1G15520,AT4G05590,AT4G24230
GO:0006848	pyruvate transport	Pre-symbiosis (24 hour)	1	1	1	AT4G05590
GO:0015908	fatty acid transport	Pre-symbiosis (24 hour)	1	1	1	AT4G24230
GO:0080168	abscisic acid transport	Pre-symbiosis (24 hour)	1	1	1	AT1G15520
GO:0006865	amino acid transport	Pre-symbiosis (24 hour)	1	1	6	AT1G25530,AT1G47670,AT1G77380,AT2G39130,AT3G30390,AT5G40780
GO:0043090	amino acid import	Pre-symbiosis (24 hour)	1	1	1	AT5G40780
GO:0015802	basic amino acid transport	Pre-symbiosis (24 hour)	1	1	1	AT1G77380
GO:0098660	inorganic ion transmembrane transport	Pre-symbiosis (24 hour)	1	1	10	AT1G31260,AT1G55910,AT2G31500,AT2G41705,AT3G05030,AT4G05590,AT4G33520,AT5G03570,AT5G62000,ATMG01360
GO:0099587	inorganic ion import across plasma membrane	Pre-symbiosis (24 hour)	1	1	1	AT3G05030
GO:0098655	cation transmembrane transport	Pre-symbiosis (24 hour)	1	1	9	AT1G31260,AT1G55910,AT2G31500,AT3G05030,AT4G05590,AT4G33520,AT5G03570,AT5G62000,ATMG01360
GO:0098662	inorganic cation transmembrane transport	Pre-symbiosis (24 hour)	1	1	9	AT1G31260,AT1G55910,AT2G31500,AT3G05030,AT4G05590,AT4G33520,AT5G03570,AT5G62000,ATMG01360
GO:0098659	inorganic cation import across plasma membrane	Pre-symbiosis (24 hour)	1	1	1	AT3G05030
GO:0035434	copper ion transmembrane transport	Pre-symbiosis (24 hour)	1	1	1	AT4G33520
GO:0035725	sodium ion transmembrane transport	Pre-symbiosis (24 hour)	1	1	1	AT3G05030
GO:0097369	sodium ion import	Pre-symbiosis (24 hour)	1	1	1	AT3G05030
GO:0098719	sodium ion import across plasma membrane	Pre-symbiosis (24 hour)	1	1	1	AT3G05030
GO:1902600	hydrogen ion transmembrane transport	Pre-symbiosis (24 hour)	1	1	1	ATMG01360
GO:0015988	energy coupled proton transmembrane transport, against electrochemical gradient	Pre-symbiosis (24 hour)	1	1	1	ATMG01360
GO:0015990	electron transport coupled proton transport	Pre-symbiosis (24 hour)	1	1	1	ATMG01360
GO:0035444	nickel cation transmembrane transport	Pre-symbiosis (24 hour)	1	1	1	AT5G03570
GO:0071805	potassium ion transmembrane transport	Pre-symbiosis (24 hour)	1	1	4	AT2G31500,AT3G05030,AT4G05590,AT5G62000
GO:0010107	potassium ion import	Pre-symbiosis (24 hour)	1	1	1	AT3G05030
GO:0071577	zinc II ion transmembrane transport	Pre-symbiosis (24 hour)	1	1	2	AT1G31260,AT1G55910
GO:0098656	anion transmembrane transport	Pre-symbiosis (24 hour)	1	1	9	AT1G25530,AT1G47670,AT1G77380,AT2G39130,AT2G41705,AT3G30390,AT4G05590,AT4G33950,AT5G20480
GO:0098661	inorganic anion transmembrane transport	Pre-symbiosis (24 hour)	1	1	1	AT2G41705
GO:1903424	fluoride transmembrane transport	Pre-symbiosis (24 hour)	1	1	1	AT2G41705
GO:1905039	carboxylic acid transmembrane transport	Pre-symbiosis (24 hour)	1	1	6	AT1G25530,AT1G47670,AT1G77380,AT2G39130,AT3G30390,AT4G05590
GO:0003333	amino acid transmembrane transport	Pre-symbiosis (24 hour)	1	1	5	AT1G25530,AT1G47670,AT1G77380,AT2G39130,AT3G30390
GO:1901475	pyruvate transmembrane transport	Pre-symbiosis (24 hour)	1	1	1	AT4G05590
GO:0016192	vesicle-mediated transport	Pre-symbiosis (24 hour)	1	1	1	AT2G19950
GO:0048193	Golgi vesicle transport	Pre-symbiosis (24 hour)	1	1	6	AT1G51160,AT1G52360,AT2G19950,AT2G21600,AT2G45200,AT3G24350
GO:0006890	retrograde vesicle-mediated transport, Golgi to ER	Pre-symbiosis (24 hour)	1	1	2	AT1G52360,AT2G21600
GO:0006891	intra-Golgi vesicle-mediated transport	Pre-symbiosis (24 hour)	1	1	1	AT2G19950
GO:0000301	retrograde transport, vesicle recycling within Golgi	Pre-symbiosis (24 hour)	1	1	1	AT2G19950
GO:0006887	exocytosis	Pre-symbiosis (24 hour)	1	1	2	AT1G21170,AT5G41950
GO:0140029	exocytic process	Pre-symbiosis (24 hour)	1	1	1	AT1G21170
GO:0015893	drug transport	Pre-symbiosis (24 hour)	1	1	6	AT1G15520,AT1G73700,AT2G29940,AT2G34360,AT2G37280,AT4G22790
GO:0006855	drug transmembrane transport	Pre-symbiosis (24 hour)	1	1	6	AT1G15520,AT1G73700,AT2G29940,AT2G34360,AT2G37280,AT4G22790
GO:0045184	establishment of protein localization	Pre-symbiosis (24 hour)	1	1	1	AT1G09070
GO:0015031	protein transport	Pre-symbiosis (24 hour)	1	1	1	AT1G09070
GO:0099118	microtubule-based protein transport	Pre-symbiosis (24 hour)	1	1	1	AT3G19990
GO:0017038	protein import	Pre-symbiosis (24 hour)	1	1	6	AT1G26170,AT2G29530,AT2G41620,AT2G45660,AT3G59280,AT5G62810
GO:0071806	protein transmembrane transport	Pre-symbiosis (24 hour)	1	1	3	AT2G29530,AT3G59280,AT5G62810
GO:0051641	cellular localization	Pre-symbiosis (24 hour)	1	1	21	AT1G09070,AT1G11060,AT1G26170,AT1G52360,AT1G74240,AT2G29530,AT2G41620,AT2G45660,AT3G19990,AT3G27100,AT3G51870,AT3G59280,AT4G05590,AT4G23100,AT4G28390,AT4G33200,AT5G20110,AT5G20610,AT5G27430,AT5G44070,AT5G62810
GO:0071166	ribonucleoprotein complex localization	Pre-symbiosis (24 hour)	1	1	2	AT2G41620,AT3G27100
GO:0051649	establishment of localization in cell	Pre-symbiosis (24 hour)	1	1	18	AT1G09070,AT1G26170,AT1G52360,AT1G74240,AT2G29530,AT2G41620,AT2G45660,AT3G19990,AT3G27100,AT3G51870,AT3G59280,AT4G05590,AT4G28390,AT4G33200,AT5G20110,AT5G20610,AT5G27430,AT5G62810
GO:0070727	cellular macromolecule localization	Pre-symbiosis (24 hour)	1	1	1	AT1G09070
GO:0034613	cellular protein localization	Pre-symbiosis (24 hour)	1	1	1	AT1G09070
GO:0072657	protein localization to membrane	Pre-symbiosis (24 hour)	1	1	1	AT2G29530
GO:0090150	establishment of protein localization to membrane	Pre-symbiosis (24 hour)	1	1	1	AT2G29530
GO:0033365	protein localization to organelle	Pre-symbiosis (24 hour)	1	1	1	AT1G09070
GO:0070585	protein localization to mitochondrion	Pre-symbiosis (24 hour)	1	1	2	AT2G29530,AT3G59280
GO:0070972	protein localization to endoplasmic reticulum	Pre-symbiosis (24 hour)	1	1	1	AT5G27430
GO:0034502	protein localization to chromosome	Pre-symbiosis (24 hour)	1	1	1	AT1G11060
GO:0071168	protein localization to chromatin	Pre-symbiosis (24 hour)	1	1	1	AT1G11060
GO:0072665	protein localization to vacuole	Pre-symbiosis (24 hour)	1	1	1	AT1G09070
GO:0072594	establishment of protein localization to organelle	Pre-symbiosis (24 hour)	1	1	1	AT1G09070
GO:0072655	establishment of protein localization to mitochondrion	Pre-symbiosis (24 hour)	1	1	2	AT2G29530,AT3G59280
GO:0072666	establishment of protein localization to vacuole	Pre-symbiosis (24 hour)	1	1	1	AT1G09070
GO:0072599	establishment of protein localization to endoplasmic reticulum	Pre-symbiosis (24 hour)	1	1	1	AT5G27430
GO:0034504	protein localization to nucleus	Pre-symbiosis (24 hour)	1	1	3	AT1G26170,AT2G41620,AT2G45660
GO:0061512	protein localization to cilium	Pre-symbiosis (24 hour)	1	1	1	AT3G19990
GO:0051640	organelle localization	Pre-symbiosis (24 hour)	1	1	7	AT1G21170,AT2G26570,AT2G45200,AT3G24350,AT4G33200,AT5G20610,AT5G46860
GO:0051647	nucleus localization	Pre-symbiosis (24 hour)	1	1	2	AT4G33200,AT5G20610
GO:0051644	plastid localization	Pre-symbiosis (24 hour)	1	1	2	AT2G26570,AT5G20610
GO:0019750	chloroplast localization	Pre-symbiosis (24 hour)	1	1	2	AT2G26570,AT5G20610
GO:0051648	vesicle localization	Pre-symbiosis (24 hour)	1	1	1	AT2G45200
GO:0051656	establishment of organelle localization	Pre-symbiosis (24 hour)	1	1	4	AT2G26570,AT2G45200,AT4G33200,AT5G20610
GO:0051667	establishment of plastid localization	Pre-symbiosis (24 hour)	1	1	2	AT2G26570,AT5G20610
GO:0051650	establishment of vesicle localization	Pre-symbiosis (24 hour)	1	1	1	AT2G45200
GO:0006903	vesicle targeting	Pre-symbiosis (24 hour)	1	1	1	AT2G45200
GO:0048199	vesicle targeting, to, from or within Golgi	Pre-symbiosis (24 hour)	1	1	1	AT2G45200
GO:0140056	organelle localization by membrane tethering	Pre-symbiosis (24 hour)	1	1	3	AT1G21170,AT3G24350,AT5G46860
GO:0048278	vesicle docking	Pre-symbiosis (24 hour)	1	1	3	AT1G21170,AT3G24350,AT5G46860
GO:0006904	vesicle docking involved in exocytosis	Pre-symbiosis (24 hour)	1	1	1	AT1G21170
GO:0046907	intracellular transport	Pre-symbiosis (24 hour)	1	1	18	AT1G09070,AT1G26170,AT1G52360,AT1G74240,AT2G29530,AT2G41620,AT2G45660,AT3G19990,AT3G27100,AT3G51870,AT3G59280,AT4G05590,AT4G28390,AT4G33200,AT5G20110,AT5G20610,AT5G27430,AT5G62810
GO:0051169	nuclear transport	Pre-symbiosis (24 hour)	1	1	4	AT1G26170,AT2G41620,AT2G45660,AT3G27100
GO:0006913	nucleocytoplasmic transport	Pre-symbiosis (24 hour)	1	1	4	AT1G26170,AT2G41620,AT2G45660,AT3G27100
GO:0051168	nuclear export	Pre-symbiosis (24 hour)	1	1	2	AT2G41620,AT3G27100
GO:0006405	RNA export from nucleus	Pre-symbiosis (24 hour)	1	1	2	AT2G41620,AT3G27100
GO:0051170	nuclear import	Pre-symbiosis (24 hour)	1	1	3	AT1G26170,AT2G41620,AT2G45660
GO:0099515	actin filament-based transport	Pre-symbiosis (24 hour)	1	1	1	AT5G20610
GO:0010970	transport along microtubule	Pre-symbiosis (24 hour)	1	1	2	AT3G19990,AT5G20110
GO:0043574	peroxisomal transport	Pre-symbiosis (24 hour)	1	1	1	AT5G62810
GO:0007034	vacuolar transport	Pre-symbiosis (24 hour)	1	1	1	AT1G09070
GO:0006839	mitochondrial transport	Pre-symbiosis (24 hour)	1	1	2	AT1G74240,AT3G51870
GO:1990542	mitochondrial transmembrane transport	Pre-symbiosis (24 hour)	1	1	1	AT2G29530
GO:0006850	mitochondrial pyruvate transport	Pre-symbiosis (24 hour)	1	1	1	AT4G05590
GO:1902361	mitochondrial pyruvate transmembrane transport	Pre-symbiosis (24 hour)	1	1	1	AT4G05590
GO:0006888	ER to Golgi vesicle-mediated transport	Pre-symbiosis (24 hour)	1	1	4	AT1G51160,AT1G52360,AT2G45200,AT3G24350
GO:0007097	nuclear migration	Pre-symbiosis (24 hour)	1	1	2	AT4G33200,AT5G20610
GO:0031022	nuclear migration along microfilament	Pre-symbiosis (24 hour)	1	1	1	AT5G20610
GO:0006886	intracellular protein transport	Pre-symbiosis (24 hour)	1	1	1	AT1G09070
GO:0098840	protein transport along microtubule	Pre-symbiosis (24 hour)	1	1	1	AT3G19990
GO:0006605	protein targeting	Pre-symbiosis (24 hour)	1	1	1	AT1G09070
GO:0045047	protein targeting to ER	Pre-symbiosis (24 hour)	1	1	1	AT5G27430
GO:0006623	protein targeting to vacuole	Pre-symbiosis (24 hour)	1	1	1	AT1G09070
GO:0065002	intracellular protein transmembrane transport	Pre-symbiosis (24 hour)	1	1	3	AT2G29530,AT3G59280,AT5G62810
GO:0044743	protein transmembrane import into intracellular organelle	Pre-symbiosis (24 hour)	1	1	3	AT2G29530,AT3G59280,AT5G62810
GO:0006611	protein export from nucleus	Pre-symbiosis (24 hour)	1	1	2	AT2G41620,AT3G27100
GO:0071426	ribonucleoprotein complex export from nucleus	Pre-symbiosis (24 hour)	1	1	2	AT2G41620,AT3G27100
GO:0071427	mRNA-containing ribonucleoprotein complex export from nucleus	Pre-symbiosis (24 hour)	1	1	2	AT2G41620,AT3G27100
GO:0006406	mRNA export from nucleus	Pre-symbiosis (24 hour)	1	1	2	AT2G41620,AT3G27100
GO:0016973	poly(A)+ mRNA export from nucleus	Pre-symbiosis (24 hour)	1	1	2	AT2G41620,AT3G27100
GO:0006606	protein import into nucleus	Pre-symbiosis (24 hour)	1	1	3	AT1G26170,AT2G41620,AT2G45660
GO:0000060	protein import into nucleus, translocation	Pre-symbiosis (24 hour)	1	1	1	AT2G45660
GO:0010817	regulation of hormone levels	Pre-symbiosis (24 hour)	1	1	2	AT4G35160,AT5G13750
GO:0042445	hormone metabolic process	Pre-symbiosis (24 hour)	1	1	1	AT4G35160
GO:0034754	cellular hormone metabolic process	Pre-symbiosis (24 hour)	1	1	1	AT4G35160
GO:0009690	cytokinin metabolic process	Pre-symbiosis (24 hour)	1	1	3	AT1G68460,AT5G14420,AT5G38450
GO:0033397	zeatin metabolic process	Pre-symbiosis (24 hour)	1	1	1	AT5G38450
GO:0033400	trans-zeatin metabolic process	Pre-symbiosis (24 hour)	1	1	1	AT5G38450
GO:0042446	hormone biosynthetic process	Pre-symbiosis (24 hour)	1	1	1	AT4G35160
GO:0009691	cytokinin biosynthetic process	Pre-symbiosis (24 hour)	1	1	2	AT1G68460,AT5G38450
GO:0033398	zeatin biosynthetic process	Pre-symbiosis (24 hour)	1	1	1	AT5G38450
GO:0033466	trans-zeatin biosynthetic process	Pre-symbiosis (24 hour)	1	1	1	AT5G38450
GO:0009850	auxin metabolic process	Pre-symbiosis (24 hour)	1	1	2	AT1G75500,AT5G14420
GO:0016131	brassinosteroid metabolic process	Pre-symbiosis (24 hour)	1	1	3	AT1G12740,AT2G36800,AT2G42850
GO:0016132	brassinosteroid biosynthetic process	Pre-symbiosis (24 hour)	1	1	2	AT1G12740,AT2G42850
GO:0009914	hormone transport	Pre-symbiosis (24 hour)	1	1	1	AT5G13750
GO:0060918	auxin transport	Pre-symbiosis (24 hour)	1	1	1	AT5G13750
GO:0009926	auxin polar transport	Pre-symbiosis (24 hour)	1	1	1	AT5G13750
GO:0010540	basipetal auxin transport	Pre-symbiosis (24 hour)	1	1	1	AT5G13750
GO:0031647	regulation of protein stability	Pre-symbiosis (24 hour)	1	1	1	AT1G09300
GO:0050821	protein stabilization	Pre-symbiosis (24 hour)	1	1	1	AT1G09300
GO:0090066	regulation of anatomical structure size	Pre-symbiosis (24 hour)	1	1	1	AT1G33240
GO:0042592	homeostatic process	Pre-symbiosis (24 hour)	1	1	4	AT1G04120,AT2G46560,AT3G05030,AT4G37270
GO:0048878	chemical homeostasis	Pre-symbiosis (24 hour)	1	1	4	AT1G04120,AT2G46560,AT3G05030,AT4G37270
GO:0033500	carbohydrate homeostasis	Pre-symbiosis (24 hour)	1	1	1	AT5G57130
GO:0055088	lipid homeostasis	Pre-symbiosis (24 hour)	1	1	3	AT1G12740,AT1G68570,AT2G42850
GO:0010268	brassinosteroid homeostasis	Pre-symbiosis (24 hour)	1	1	2	AT1G12740,AT2G42850
GO:0030104	water homeostasis	Pre-symbiosis (24 hour)	1	1	1	AT1G21270
GO:0050801	ion homeostasis	Pre-symbiosis (24 hour)	1	1	5	AT1G04120,AT2G46560,AT3G05030,AT4G37270,AT5G02600
GO:0006885	regulation of pH	Pre-symbiosis (24 hour)	1	1	2	AT2G46560,AT3G05030
GO:0045851	pH reduction	Pre-symbiosis (24 hour)	1	1	1	AT2G46560
GO:0072507	divalent inorganic cation homeostasis	Pre-symbiosis (24 hour)	1	1	2	AT1G53210,AT4G37270
GO:0055065	metal ion homeostasis	Pre-symbiosis (24 hour)	1	1	5	AT1G04120,AT1G53210,AT3G05030,AT4G37270,AT5G02600
GO:0055076	transition metal ion homeostasis	Pre-symbiosis (24 hour)	1	1	2	AT4G37270,AT5G02600
GO:0055068	cobalt ion homeostasis	Pre-symbiosis (24 hour)	1	1	1	AT5G03570
GO:0055070	copper ion homeostasis	Pre-symbiosis (24 hour)	1	1	1	AT4G37270
GO:0055069	zinc ion homeostasis	Pre-symbiosis (24 hour)	1	1	1	AT4G37270
GO:0055078	sodium ion homeostasis	Pre-symbiosis (24 hour)	1	1	1	AT5G02600
GO:0055074	calcium ion homeostasis	Pre-symbiosis (24 hour)	1	1	1	AT1G53210
GO:0055081	anion homeostasis	Pre-symbiosis (24 hour)	1	1	2	AT1G68320,AT1G68570
GO:0072506	trivalent inorganic anion homeostasis	Pre-symbiosis (24 hour)	1	1	1	AT1G68320
GO:0072505	divalent inorganic anion homeostasis	Pre-symbiosis (24 hour)	1	1	1	AT1G68320
GO:0055083	monovalent inorganic anion homeostasis	Pre-symbiosis (24 hour)	1	1	1	AT1G68320
GO:0055062	phosphate ion homeostasis	Pre-symbiosis (24 hour)	1	1	1	AT1G68320
GO:0010336	gibberellic acid homeostasis	Pre-symbiosis (24 hour)	1	1	1	AT1G68570
GO:0051452	intracellular pH reduction	Pre-symbiosis (24 hour)	1	1	1	AT2G46560
GO:0007035	vacuolar acidification	Pre-symbiosis (24 hour)	1	1	1	AT2G46560
GO:0006875	cellular metal ion homeostasis	Pre-symbiosis (24 hour)	1	1	3	AT1G04120,AT4G37270,AT5G02600
GO:0046916	cellular transition metal ion homeostasis	Pre-symbiosis (24 hour)	1	1	2	AT4G37270,AT5G02600
GO:0006878	cellular copper ion homeostasis	Pre-symbiosis (24 hour)	1	1	1	AT4G37270
GO:0030007	cellular potassium ion homeostasis	Pre-symbiosis (24 hour)	1	1	2	AT1G04120,AT5G55630
GO:0042391	regulation of membrane potential	Pre-symbiosis (24 hour)	1	1	2	AT4G03560,AT5G55630
GO:0051899	membrane depolarization	Pre-symbiosis (24 hour)	1	1	1	AT4G03560
GO:0001508	action potential	Pre-symbiosis (24 hour)	1	1	1	AT4G03560
GO:0086010	membrane depolarization during action potential	Pre-symbiosis (24 hour)	1	1	1	AT4G03560
GO:0030322	stabilization of membrane potential	Pre-symbiosis (24 hour)	1	1	1	AT5G55630
GO:0006450	regulation of translational fidelity	Pre-symbiosis (24 hour)	1	1	1	ATCG00380
GO:0090559	regulation of membrane permeability	Pre-symbiosis (24 hour)	1	1	1	AT4G28390
GO:0065009	regulation of molecular function	Pre-symbiosis (24 hour)	1	1	16	AT1G11060,AT1G47710,AT2G17520,AT2G23380,AT2G30710,AT2G31500,AT2G32710,AT3G17980,AT4G05590,AT4G26840,AT4G33950,AT5G19390,AT5G20110,AT5G20480,AT5G47080,AT5G48820
GO:0040030	regulation of molecular function, epigenetic	Pre-symbiosis (24 hour)	1	1	1	AT2G23380
GO:0045857	negative regulation of molecular function, epigenetic	Pre-symbiosis (24 hour)	1	1	1	AT2G23380
GO:0051098	regulation of binding	Pre-symbiosis (24 hour)	1	1	1	AT1G11060
GO:0051101	regulation of DNA binding	Pre-symbiosis (24 hour)	1	1	1	AT1G11060
GO:0044093	positive regulation of molecular function	Pre-symbiosis (24 hour)	1	1	4	AT1G11060,AT2G17520,AT3G17980,AT5G20110
GO:0051099	positive regulation of binding	Pre-symbiosis (24 hour)	1	1	1	AT1G11060
GO:0043388	positive regulation of DNA binding	Pre-symbiosis (24 hour)	1	1	1	AT1G11060
GO:0050790	regulation of catalytic activity	Pre-symbiosis (24 hour)	1	1	4	AT1G47710,AT2G32710,AT3G17980,AT5G20110
GO:0051338	regulation of transferase activity	Pre-symbiosis (24 hour)	1	1	3	AT2G17520,AT2G32710,AT5G48820
GO:0051336	regulation of hydrolase activity	Pre-symbiosis (24 hour)	1	1	4	AT1G47710,AT2G17520,AT3G17980,AT5G20110
GO:2000574	regulation of microtubule motor activity	Pre-symbiosis (24 hour)	1	1	1	AT5G20110
GO:0043462	regulation of ATPase activity	Pre-symbiosis (24 hour)	1	1	1	AT5G20110
GO:2000580	regulation of ATP-dependent microtubule motor activity, plus-end-directed	Pre-symbiosis (24 hour)	1	1	1	AT5G20110
GO:0043087	regulation of GTPase activity	Pre-symbiosis (24 hour)	1	1	3	AT2G30710,AT3G17980,AT5G19390
GO:0043086	negative regulation of catalytic activity	Pre-symbiosis (24 hour)	1	1	3	AT1G47710,AT2G32710,AT5G48820
GO:0051348	negative regulation of transferase activity	Pre-symbiosis (24 hour)	1	1	2	AT2G32710,AT5G48820
GO:0051346	negative regulation of hydrolase activity	Pre-symbiosis (24 hour)	1	1	1	AT1G47710
GO:0043085	positive regulation of catalytic activity	Pre-symbiosis (24 hour)	1	1	2	AT3G17980,AT5G20110
GO:0051345	positive regulation of hydrolase activity	Pre-symbiosis (24 hour)	1	1	3	AT2G17520,AT3G17980,AT5G20110
GO:2000576	positive regulation of microtubule motor activity	Pre-symbiosis (24 hour)	1	1	1	AT5G20110
GO:0032781	positive regulation of ATPase activity	Pre-symbiosis (24 hour)	1	1	1	AT5G20110
GO:2000582	positive regulation of ATP-dependent microtubule motor activity, plus-end-directed	Pre-symbiosis (24 hour)	1	1	1	AT5G20110
GO:0043547	positive regulation of GTPase activity	Pre-symbiosis (24 hour)	1	1	1	AT3G17980
GO:0090630	activation of GTPase activity	Pre-symbiosis (24 hour)	1	1	1	AT2G30710
GO:0051347	positive regulation of transferase activity	Pre-symbiosis (24 hour)	1	1	1	AT2G17520
GO:0040011	locomotion	Pre-symbiosis (24 hour)	1	1	1	AT5G61760
GO:0042330	taxis	Pre-symbiosis (24 hour)	1	1	1	AT5G61760
GO:0006935	chemotaxis	Pre-symbiosis (24 hour)	1	1	1	AT5G61760
GO:0050918	positive chemotaxis	Pre-symbiosis (24 hour)	1	1	1	AT5G61760
GO:0001763	morphogenesis of a branching structure	Pre-symbiosis (24 hour)	1	1	2	AT4G13510,AT4G32810
GO:0010232	vascular transport	Pre-symbiosis (24 hour)	1	1	2	AT5G02600,AT5G57130
GO:0010233	phloem transport	Pre-symbiosis (24 hour)	1	1	2	AT5G02600,AT5G57130
GO:0019827	stem cell population maintenance	Pre-symbiosis (24 hour)	1	1	2	AT2G45660,AT3G08550
GO:0007275	multicellular organism development	Pre-symbiosis (24 hour)	1	1	101	AT1G06230,AT1G08320,AT1G09700,AT1G11060,AT1G11190,AT1G12740,AT1G17020,AT1G17110,AT1G18390,AT1G18640,AT1G18750,AT1G22770,AT1G30490,AT1G33240,AT1G56180,AT1G65570,AT1G67580,AT1G68480,AT1G75540,AT2G04660,AT2G22370,AT2G23380,AT2G34710,AT2G37860,AT2G38280,AT2G41370,AT2G41720,AT2G42160,AT2G42850,AT2G45660,AT3G04070,AT3G06350,AT3G07160,AT3G07650,AT3G08550,AT3G10390,AT3G12380,AT3G13300,AT3G15010,AT3G16785…
GO:0009790	embryo development	Pre-symbiosis (24 hour)	1	1	23	AT1G11060,AT1G18640,AT1G30490,AT2G34710,AT2G38280,AT2G41720,AT3G04070,AT3G06350,AT3G13300,AT3G23440,AT3G54420,AT4G02570,AT4G31400,AT5G02110,AT5G03800,AT5G04560,AT5G05950,AT5G10250,AT5G13170,AT5G23660,AT5G27030,AT5G61760,AT5G62940
GO:0048598	embryonic morphogenesis	Pre-symbiosis (24 hour)	1	1	1	AT5G10250
GO:0009838	abscission	Pre-symbiosis (24 hour)	1	1	1	AT2G41370
GO:0048229	gametophyte development	Pre-symbiosis (24 hour)	1	1	16	AT1G18640,AT1G18750,AT1G66170,AT1G69500,AT2G04660,AT3G07160,AT3G21180,AT3G23440,AT3G23940,AT3G53810,AT4G31400,AT4G34850,AT5G22000,AT5G50260,AT5G55810,AT5G61760
GO:0009555	pollen development	Pre-symbiosis (24 hour)	1	1	13	AT1G18640,AT1G18750,AT1G66170,AT1G69500,AT3G07160,AT3G21180,AT3G23940,AT3G53810,AT4G34850,AT5G22000,AT5G50260,AT5G55810,AT5G61760
GO:0010152	pollen maturation	Pre-symbiosis (24 hour)	1	1	1	AT1G18750
GO:0009553	embryo sac development	Pre-symbiosis (24 hour)	1	1	5	AT2G04660,AT3G23440,AT3G23940,AT4G31400,AT5G22000
GO:0048731	system development	Pre-symbiosis (24 hour)	1	1	81	AT1G06230,AT1G08320,AT1G11060,AT1G11190,AT1G17020,AT1G17110,AT1G18390,AT1G18640,AT1G22770,AT1G30490,AT1G56180,AT1G65570,AT1G67580,AT1G68480,AT2G22370,AT2G23380,AT2G34710,AT2G37860,AT2G38280,AT2G41370,AT2G41720,AT2G45660,AT3G04070,AT3G06350,AT3G07650,AT3G08550,AT3G10390,AT3G12380,AT3G13300,AT3G15010,AT3G16785,AT3G18830,AT3G18990,AT3G20740,AT3G23440,AT3G23940,AT3G47450,AT3G54420,AT3G54610,AT3G55510…
GO:0061458	reproductive system development	Pre-symbiosis (24 hour)	1	1	54	AT1G08320,AT1G11060,AT1G11190,AT1G17110,AT1G18390,AT1G18640,AT1G22770,AT1G30490,AT1G67580,AT1G68480,AT2G22370,AT2G23380,AT2G34710,AT2G38280,AT2G41370,AT2G41720,AT2G45660,AT3G04070,AT3G06350,AT3G07650,AT3G10390,AT3G13300,AT3G18990,AT3G20740,AT3G23440,AT3G54420,AT3G54610,AT3G55510,AT3G57670,AT4G02560,AT4G02570,AT4G04920,AT4G15180,AT4G22140,AT4G23100,AT4G28370,AT4G31400,AT5G02110,AT5G02600,AT5G03800…
GO:0048367	shoot system development	Pre-symbiosis (24 hour)	1	1	42	AT1G08320,AT1G11190,AT1G17020,AT1G17110,AT1G22770,AT1G30490,AT1G56180,AT1G68480,AT2G22370,AT2G23380,AT2G34710,AT2G37860,AT2G41370,AT2G45660,AT3G13300,AT3G15010,AT3G18990,AT3G47450,AT3G54610,AT3G55510,AT3G55515,AT3G57670,AT4G02570,AT4G15180,AT4G19040,AT4G23100,AT4G31400,AT4G32810,AT4G33950,AT4G35890,AT5G02600,AT5G05780,AT5G10250,AT5G13170,AT5G14930,AT5G20730,AT5G24860,AT5G27030,AT5G50260,AT5G58560…
GO:0010016	shoot system morphogenesis	Pre-symbiosis (24 hour)	1	1	3	AT2G41370,AT3G13300,AT5G27030
GO:0010346	shoot axis formation	Pre-symbiosis (24 hour)	1	1	1	AT4G32810
GO:0010223	secondary shoot formation	Pre-symbiosis (24 hour)	1	1	1	AT4G32810
GO:0022622	root system development	Pre-symbiosis (24 hour)	1	1	10	AT1G65570,AT3G08550,AT3G12380,AT3G13300,AT3G54610,AT4G04920,AT5G02600,AT5G13750,AT5G24740,AT5G40330
GO:0099402	plant organ development	Pre-symbiosis (24 hour)	1	1	48	AT1G06230,AT1G08320,AT1G11190,AT1G17020,AT1G17110,AT1G18640,AT1G30490,AT1G56180,AT1G65570,AT1G68480,AT2G22370,AT2G23380,AT2G34710,AT2G37860,AT2G41370,AT3G08550,AT3G12380,AT3G13300,AT3G15010,AT3G16785,AT3G18830,AT3G23940,AT3G47450,AT3G54610,AT4G02570,AT4G04920,AT4G13510,AT4G15180,AT4G19040,AT4G30080,AT4G31400,AT4G32810,AT4G33950,AT4G35890,AT5G02600,AT5G05780,AT5G10250,AT5G13170,AT5G13750,AT5G14930…
GO:1905392	plant organ morphogenesis	Pre-symbiosis (24 hour)	1	1	8	AT2G41370,AT3G08550,AT3G12380,AT3G13300,AT3G54610,AT5G02600,AT5G24740,AT5G40330
GO:0090693	plant organ senescence	Pre-symbiosis (24 hour)	1	1	9	AT1G11190,AT1G17020,AT3G15010,AT4G19040,AT4G35890,AT5G13170,AT5G14930,AT5G62000,AT5G62620
GO:0048827	phyllome development	Pre-symbiosis (24 hour)	1	1	30	AT1G08320,AT1G11190,AT1G17020,AT1G17110,AT1G30490,AT1G56180,AT1G68480,AT2G22370,AT2G23380,AT2G34710,AT2G37860,AT2G41370,AT3G13300,AT3G15010,AT3G47450,AT4G02570,AT4G15180,AT4G19040,AT4G31400,AT4G32810,AT4G33950,AT4G35890,AT5G05780,AT5G10250,AT5G13170,AT5G14930,AT5G20730,AT5G50260,AT5G58560,AT5G62620
GO:0048366	leaf development	Pre-symbiosis (24 hour)	1	1	21	AT1G11190,AT1G17020,AT1G17110,AT1G56180,AT1G68480,AT2G23380,AT2G37860,AT3G13300,AT3G15010,AT3G47450,AT4G02570,AT4G19040,AT4G32810,AT4G33950,AT4G35890,AT5G05780,AT5G10250,AT5G13170,AT5G14930,AT5G20730,AT5G62620
GO:0010150	leaf senescence	Pre-symbiosis (24 hour)	1	1	9	AT1G11190,AT1G17020,AT3G15010,AT4G19040,AT4G35890,AT5G13170,AT5G14930,AT5G62000,AT5G62620
GO:0009965	leaf morphogenesis	Pre-symbiosis (24 hour)	1	1	6	AT1G68480,AT2G23380,AT3G13300,AT4G32810,AT5G05780,AT5G10250
GO:0010432	bract development	Pre-symbiosis (24 hour)	1	1	1	AT2G41370
GO:0010433	bract morphogenesis	Pre-symbiosis (24 hour)	1	1	1	AT2G41370
GO:0010434	bract formation	Pre-symbiosis (24 hour)	1	1	1	AT2G41370
GO:0048364	root development	Pre-symbiosis (24 hour)	1	1	10	AT1G65570,AT3G08550,AT3G12380,AT3G13300,AT3G54610,AT4G04920,AT5G02600,AT5G13750,AT5G24740,AT5G40330
GO:0080022	primary root development	Pre-symbiosis (24 hour)	1	1	1	AT5G10250
GO:0048829	root cap development	Pre-symbiosis (24 hour)	1	1	1	AT1G65570
GO:0010015	root morphogenesis	Pre-symbiosis (24 hour)	1	1	7	AT3G08550,AT3G12380,AT3G13300,AT3G54610,AT5G02600,AT5G24740,AT5G40330
GO:0010053	root epidermal cell differentiation	Pre-symbiosis (24 hour)	1	1	2	AT5G40330,AT5G41950
GO:0010054	trichoblast differentiation	Pre-symbiosis (24 hour)	1	1	1	AT5G41950
GO:0048764	trichoblast maturation	Pre-symbiosis (24 hour)	1	1	1	AT5G41950
GO:0048765	root hair cell differentiation	Pre-symbiosis (24 hour)	1	1	1	AT5G41950
GO:0080147	root hair cell development	Pre-symbiosis (24 hour)	1	1	1	AT5G41950
GO:0009791	post-embryonic development	Pre-symbiosis (24 hour)	1	1	69	AT1G08320,AT1G11060,AT1G11190,AT1G17110,AT1G18390,AT1G18640,AT1G22770,AT1G30490,AT1G33240,AT1G67580,AT1G68480,AT1G75540,AT2G22370,AT2G23380,AT2G34710,AT2G38280,AT2G41370,AT2G41720,AT2G42160,AT2G45660,AT3G04070,AT3G06350,AT3G07650,AT3G10160,AT3G10390,AT3G13300,AT3G18830,AT3G18990,AT3G20440,AT3G20740,AT3G23440,AT3G42170,AT3G54420,AT3G54610,AT3G55510,AT3G57670,AT4G02560,AT4G02570,AT4G03560,AT4G04920…
GO:0090351	seedling development	Pre-symbiosis (24 hour)	1	1	6	AT2G42160,AT4G03560,AT4G22140,AT4G28370,AT5G53180,AT5G55630
GO:0010050	vegetative phase change	Pre-symbiosis (24 hour)	1	1	1	AT3G54610
GO:0010374	stomatal complex development	Pre-symbiosis (24 hour)	1	1	1	AT1G33240
GO:0090696	post-embryonic plant organ development	Pre-symbiosis (24 hour)	1	1	7	AT1G68480,AT2G04160,AT3G18830,AT3G20860,AT4G13510,AT5G19790,AT5G20730
GO:0048528	post-embryonic root development	Pre-symbiosis (24 hour)	1	1	6	AT2G04160,AT3G18830,AT3G20860,AT4G13510,AT5G19790,AT5G20730
GO:0048527	lateral root development	Pre-symbiosis (24 hour)	1	1	5	AT2G04160,AT3G18830,AT3G20860,AT4G13510,AT5G20730
GO:0090697	post-embryonic plant organ morphogenesis	Pre-symbiosis (24 hour)	1	1	6	AT1G68480,AT2G04160,AT3G18830,AT3G20860,AT4G13510,AT5G20730
GO:0010101	post-embryonic root morphogenesis	Pre-symbiosis (24 hour)	1	1	5	AT2G04160,AT3G18830,AT3G20860,AT4G13510,AT5G20730
GO:0010102	lateral root morphogenesis	Pre-symbiosis (24 hour)	1	1	5	AT2G04160,AT3G18830,AT3G20860,AT4G13510,AT5G20730
GO:0080181	lateral root branching	Pre-symbiosis (24 hour)	1	1	1	AT4G13510
GO:0009640	photomorphogenesis	Pre-symbiosis (24 hour)	1	1	1	AT1G75540
GO:0010311	lateral root formation	Pre-symbiosis (24 hour)	1	1	4	AT3G18830,AT3G20860,AT4G13510,AT5G20730
GO:0007389	pattern specification process	Pre-symbiosis (24 hour)	1	1	12	AT1G09700,AT1G30490,AT1G33240,AT1G68480,AT2G22370,AT2G34710,AT2G41370,AT4G30080,AT4G31400,AT5G10250,AT5G24740,AT5G51590
GO:0009798	axis specification	Pre-symbiosis (24 hour)	1	1	3	AT1G30490,AT2G34710,AT2G41370
GO:0065001	specification of axis polarity	Pre-symbiosis (24 hour)	1	1	3	AT1G30490,AT2G34710,AT2G41370
GO:0009799	specification of symmetry	Pre-symbiosis (24 hour)	1	1	2	AT1G30490,AT2G34710
GO:0009855	determination of bilateral symmetry	Pre-symbiosis (24 hour)	1	1	2	AT1G30490,AT2G34710
GO:0003002	regionalization	Pre-symbiosis (24 hour)	1	1	10	AT1G09700,AT1G30490,AT1G33240,AT2G22370,AT2G34710,AT2G41370,AT4G31400,AT5G10250,AT5G24740,AT5G51590
GO:0010375	stomatal complex patterning	Pre-symbiosis (24 hour)	1	1	1	AT1G33240
GO:0009954	proximal/distal pattern formation	Pre-symbiosis (24 hour)	1	1	2	AT1G09700,AT2G41370
GO:0010589	leaf proximal/distal pattern formation	Pre-symbiosis (24 hour)	1	1	1	AT1G09700
GO:1990064	ground tissue pattern formation	Pre-symbiosis (24 hour)	1	1	1	AT5G24740
GO:0009955	adaxial/abaxial pattern specification	Pre-symbiosis (24 hour)	1	1	3	AT1G30490,AT2G34710,AT2G41370
GO:0009943	adaxial/abaxial axis specification	Pre-symbiosis (24 hour)	1	1	3	AT1G30490,AT2G34710,AT2G41370
GO:0009944	polarity specification of adaxial/abaxial axis	Pre-symbiosis (24 hour)	1	1	3	AT1G30490,AT2G34710,AT2G41370
GO:0009956	radial pattern formation	Pre-symbiosis (24 hour)	1	1	1	AT4G31400
GO:0060771	phyllotactic patterning	Pre-symbiosis (24 hour)	1	1	1	AT4G31400
GO:0060772	leaf phyllotactic patterning	Pre-symbiosis (24 hour)	1	1	1	AT4G31400
GO:0010051	xylem and phloem pattern formation	Pre-symbiosis (24 hour)	1	1	3	AT1G09700,AT5G10250,AT5G51590
GO:0010305	leaf vascular tissue pattern formation	Pre-symbiosis (24 hour)	1	1	2	AT1G09700,AT5G10250
GO:0090701	specification of plant organ identity	Pre-symbiosis (24 hour)	1	1	1	AT1G68480
GO:0009880	embryonic pattern specification	Pre-symbiosis (24 hour)	1	1	1	AT1G30490
GO:0010074	maintenance of meristem identity	Pre-symbiosis (24 hour)	1	1	2	AT2G45660,AT3G08550
GO:0010077	maintenance of inflorescence meristem identity	Pre-symbiosis (24 hour)	1	1	1	AT2G45660
GO:0010078	maintenance of root meristem identity	Pre-symbiosis (24 hour)	1	1	1	AT3G08550
GO:0010022	meristem determinacy	Pre-symbiosis (24 hour)	1	1	2	AT2G41370,AT3G55510
GO:0009845	seed germination	Pre-symbiosis (24 hour)	1	1	6	AT2G42160,AT4G03560,AT4G22140,AT4G28370,AT5G53180,AT5G55630
GO:0009561	megagametogenesis	Pre-symbiosis (24 hour)	1	1	3	AT2G04660,AT3G23440,AT5G22000
GO:0055046	microgametogenesis	Pre-symbiosis (24 hour)	1	1	1	AT5G22000
GO:0048511	rhythmic process	Pre-symbiosis (24 hour)	1	1	9	AT1G15950,AT1G22770,AT3G07650,AT3G14620,AT3G46780,AT3G59470,AT4G02570,AT4G03390,AT4G04920
GO:0007623	circadian rhythm	Pre-symbiosis (24 hour)	1	1	9	AT1G15950,AT1G22770,AT3G07650,AT3G14620,AT3G46780,AT3G59470,AT4G02570,AT4G03390,AT4G04920
GO:0051703	intraspecies interaction between organisms	Pre-symbiosis (24 hour)	1	1	1	AT3G51550
GO:0044764	multi-organism cellular process	Pre-symbiosis (24 hour)	1	1	5	AT1G06230,AT1G32750,AT2G23380,AT5G53430,AT5G56950
GO:0009292	genetic transfer	Pre-symbiosis (24 hour)	1	1	5	AT1G06230,AT1G32750,AT2G23380,AT5G53430,AT5G56950
GO:0009294	DNA mediated transformation	Pre-symbiosis (24 hour)	1	1	5	AT1G06230,AT1G32750,AT2G23380,AT5G53430,AT5G56950
GO:0044706	multi-multicellular organism process	Pre-symbiosis (24 hour)	1	1	5	AT1G18750,AT2G43900,AT3G48820,AT3G57670,AT5G61760
GO:0044419	interspecies interaction between organisms	Pre-symbiosis (24 hour)	1	1	2	AT1G32370,AT2G27040
GO:0035821	modification of morphology or physiology of other organism	Pre-symbiosis (24 hour)	1	1	1	AT2G27040
GO:0044403	symbiosis, encompassing mutualism through parasitism	Pre-symbiosis (24 hour)	1	1	2	AT1G32370,AT2G27040
GO:0051817	modification of morphology or physiology of other organism involved in symbiotic interaction	Pre-symbiosis (24 hour)	1	1	1	AT2G27040
GO:0016032	viral process	Pre-symbiosis (24 hour)	1	1	2	AT1G32370,AT2G27040
GO:0019058	viral life cycle	Pre-symbiosis (24 hour)	1	1	1	AT1G32370
GO:0019079	viral genome replication	Pre-symbiosis (24 hour)	1	1	1	AT1G32370
GO:0046786	viral replication complex formation and maintenance	Pre-symbiosis (24 hour)	1	1	1	AT1G32370
GO:0051701	interaction with host	Pre-symbiosis (24 hour)	1	1	1	AT2G27040
GO:0044003	modification by symbiont of host morphology or physiology	Pre-symbiosis (24 hour)	1	1	1	AT2G27040
GO:0019048	modulation by virus of host morphology or physiology	Pre-symbiosis (24 hour)	1	1	1	AT2G27040
GO:0098543	detection of other organism	Pre-symbiosis (24 hour)	1	1	1	AT5G20480
GO:0009624	response to nematode	Pre-symbiosis (24 hour)	1	1	2	AT2G47260,AT3G51870
GO:0009620	response to fungus	Pre-symbiosis (24 hour)	1	1	21	AT1G17615,AT1G79670,AT1G79680,AT2G22370,AT2G34930,AT2G39210,AT3G18165,AT3G24550,AT3G51550,AT4G16950,AT4G19040,AT4G23100,AT4G24230,AT4G31180,AT4G37870,AT4G38540,AT5G09860,AT5G14620,AT5G38280,AT5G42650,AT5G50260
GO:0080027	response to herbivore	Pre-symbiosis (24 hour)	1	1	2	AT2G14580,AT5G23960
GO:0002237	response to molecule of bacterial origin	Pre-symbiosis (24 hour)	1	1	4	AT1G08320,AT1G80460,AT3G50930,AT3G59280
GO:0016045	detection of bacterium	Pre-symbiosis (24 hour)	1	1	1	AT5G20480
GO:0002239	response to oomycetes	Pre-symbiosis (24 hour)	1	1	4	AT3G59280,AT4G10490,AT5G10530,AT5G14930
GO:0009615	response to virus	Pre-symbiosis (24 hour)	1	1	3	AT1G14790,AT2G27040,AT5G14930
GO:0050832	defense response to fungus	Pre-symbiosis (24 hour)	1	1	17	AT1G17615,AT2G22370,AT2G34930,AT2G39210,AT3G18165,AT3G51550,AT4G16950,AT4G19040,AT4G23100,AT4G24230,AT4G31180,AT4G37870,AT4G38540,AT5G09860,AT5G14620,AT5G42650,AT5G50260
GO:0009682	induced systemic resistance	Pre-symbiosis (24 hour)	1	1	1	AT2G41370
GO:0002229	defense response to oomycetes	Pre-symbiosis (24 hour)	1	1	4	AT3G59280,AT4G10490,AT5G10530,AT5G14930
GO:0051607	defense response to virus	Pre-symbiosis (24 hour)	1	1	3	AT2G27040,AT2G43710,AT5G14930
GO:0009627	systemic acquired resistance	Pre-symbiosis (24 hour)	1	1	1	AT4G04920
GO:0009817	defense response to fungus, incompatible interaction	Pre-symbiosis (24 hour)	1	1	2	AT4G16950,AT4G37870
GO:0071840	cellular component organization or biogenesis	Pre-symbiosis (24 hour)	1	1	72	AT1G05910,AT1G06530,AT1G06920,AT1G11060,AT1G12800,AT1G18750,AT1G20830,AT1G21460,AT1G27440,AT1G29170,AT1G33240,AT1G42440,AT1G47720,AT1G69070,AT1G72710,AT1G75500,AT1G77320,AT1G80350,AT2G19950,AT2G20650,AT2G23380,AT2G27040,AT2G29530,AT2G33560,AT2G38080,AT2G41620,AT2G46560,AT3G03340,AT3G08550,AT3G10390,AT3G15095,AT3G19990,AT3G27100,AT3G27730,AT3G43610,AT3G47450,AT3G48820,AT3G54610,AT3G57670,AT3G59280…
GO:0044085	cellular component biogenesis	Pre-symbiosis (24 hour)	1	1	24	AT1G06920,AT1G12800,AT1G21460,AT1G29170,AT1G42440,AT1G69070,AT1G75500,AT1G80350,AT2G41620,AT2G46560,AT3G03340,AT3G08550,AT3G15095,AT3G43610,AT3G47450,AT4G04920,AT4G13510,AT4G22140,AT4G32820,AT5G10070,AT5G16690,AT5G20110,AT5G39785,AT5G55630
GO:0070271	protein complex biogenesis	Pre-symbiosis (24 hour)	1	1	18	AT1G21170,AT1G21460,AT1G29170,AT2G22370,AT2G41620,AT2G46560,AT3G15095,AT3G17880,AT3G28700,AT3G43610,AT4G09730,AT4G13510,AT4G14570,AT4G19006,AT5G23660,AT5G55630,AT5G56280,AT5G58220
GO:0097031	mitochondrial respiratory chain complex I biogenesis	Pre-symbiosis (24 hour)	1	1	1	AT3G28700
GO:0080158	chloroplast ribulose bisphosphate carboxylase complex biogenesis	Pre-symbiosis (24 hour)	1	1	1	AT4G09730
GO:0022613	ribonucleoprotein complex biogenesis	Pre-symbiosis (24 hour)	1	1	3	AT1G42440,AT1G69070,AT3G03340
GO:0042254	ribosome biogenesis	Pre-symbiosis (24 hour)	1	1	1	AT1G69070
GO:0006364	rRNA processing	Pre-symbiosis (24 hour)	1	1	6	AT1G12800,AT1G42440,AT1G69070,AT4G34910,AT5G10070,AT5G11010
GO:0000460	maturation of 5.8S rRNA	Pre-symbiosis (24 hour)	1	1	3	AT1G12800,AT3G07750,AT5G11010
GO:0000466	maturation of 5.8S rRNA from tricistronic rRNA transcript (SSU-rRNA, 5.8S rRNA, LSU-rRNA)	Pre-symbiosis (24 hour)	1	1	3	AT1G12800,AT3G07750,AT5G11010
GO:1901259	chloroplast rRNA processing	Pre-symbiosis (24 hour)	1	1	2	AT1G12800,AT4G09730
GO:0000469	cleavage involved in rRNA processing	Pre-symbiosis (24 hour)	1	1	3	AT1G42440,AT3G07750,AT5G11010
GO:0000459	exonucleolytic trimming involved in rRNA processing	Pre-symbiosis (24 hour)	1	1	1	AT3G07750
GO:0000478	endonucleolytic cleavage involved in rRNA processing	Pre-symbiosis (24 hour)	1	1	2	AT1G42440,AT5G11010
GO:0000479	endonucleolytic cleavage of tricistronic rRNA transcript (SSU-rRNA, 5.8S rRNA, LSU-rRNA)	Pre-symbiosis (24 hour)	1	1	2	AT1G42440,AT5G11010
GO:0031125	rRNA 3'-end processing	Pre-symbiosis (24 hour)	1	1	1	AT3G07750
GO:0000467	exonucleolytic trimming to generate mature 3'-end of 5.8S rRNA from tricistronic rRNA transcript (SSU-rRNA, 5.8S rRNA, LSU-rRNA)	Pre-symbiosis (24 hour)	1	1	1	AT3G07750
GO:0042274	ribosomal small subunit biogenesis	Pre-symbiosis (24 hour)	1	1	4	AT1G12800,AT1G42440,AT1G69070,AT5G10070
GO:0030490	maturation of SSU-rRNA	Pre-symbiosis (24 hour)	1	1	4	AT1G12800,AT1G42440,AT1G69070,AT5G10070
GO:0000462	maturation of SSU-rRNA from tricistronic rRNA transcript (SSU-rRNA, 5.8S rRNA, LSU-rRNA)	Pre-symbiosis (24 hour)	1	1	2	AT1G12800,AT1G42440
GO:0042273	ribosomal large subunit biogenesis	Pre-symbiosis (24 hour)	1	1	2	AT2G18220,AT5G11010
GO:0000470	maturation of LSU-rRNA	Pre-symbiosis (24 hour)	1	1	1	AT5G11010
GO:0000463	maturation of LSU-rRNA from tricistronic rRNA transcript (SSU-rRNA, 5.8S rRNA, LSU-rRNA)	Pre-symbiosis (24 hour)	1	1	1	AT5G11010
GO:0000448	cleavage in ITS2 between 5.8S rRNA and LSU-rRNA of tricistronic rRNA transcript (SSU-rRNA, 5.8S rRNA, LSU-rRNA)	Pre-symbiosis (24 hour)	1	1	1	AT5G11010
GO:0070589	cellular component macromolecule biosynthetic process	Pre-symbiosis (24 hour)	1	1	2	AT3G08550,AT4G04920
GO:0042546	cell wall biogenesis	Pre-symbiosis (24 hour)	1	1	13	AT1G06920,AT1G27440,AT1G75500,AT1G80350,AT2G38080,AT2G40320,AT3G08550,AT4G04920,AT4G28500,AT5G15630,AT5G19390,AT5G41040,AT5G54690
GO:0044038	cell wall macromolecule biosynthetic process	Pre-symbiosis (24 hour)	1	1	2	AT3G08550,AT4G04920
GO:0070592	cell wall polysaccharide biosynthetic process	Pre-symbiosis (24 hour)	1	1	2	AT3G08550,AT4G04920
GO:0045492	xylan biosynthetic process	Pre-symbiosis (24 hour)	1	1	2	AT1G27440,AT5G54690
GO:0010417	glucuronoxylan biosynthetic process	Pre-symbiosis (24 hour)	1	1	2	AT1G27440,AT5G54690
GO:0009832	plant-type cell wall biogenesis	Pre-symbiosis (24 hour)	1	1	12	AT1G06920,AT1G27440,AT1G75500,AT1G80350,AT2G38080,AT2G40320,AT3G08550,AT4G04920,AT4G28500,AT5G15630,AT5G19390,AT5G41040
GO:0009834	plant-type secondary cell wall biogenesis	Pre-symbiosis (24 hour)	1	1	7	AT1G06920,AT1G27440,AT1G75500,AT2G38080,AT2G40320,AT4G28500,AT5G15630
GO:0016043	cellular component organization	Pre-symbiosis (24 hour)	1	1	40	AT1G11060,AT1G18750,AT1G21460,AT1G29170,AT1G33240,AT1G47720,AT1G75500,AT1G80350,AT2G19950,AT2G23380,AT2G33560,AT2G41620,AT2G46560,AT3G03340,AT3G08550,AT3G10390,AT3G15095,AT3G19990,AT3G27100,AT3G43610,AT3G47450,AT3G48820,AT3G54610,AT3G57670,AT4G04920,AT4G13510,AT4G22140,AT4G23100,AT4G31270,AT4G31400,AT4G32820,AT4G33200,AT5G16690,AT5G20110,AT5G40330,AT5G41950,AT5G42480,AT5G55630,AT5G62810,AT5G63840
GO:0097435	supramolecular fiber organization	Pre-symbiosis (24 hour)	1	1	3	AT1G29170,AT1G80350,AT3G43610
GO:0043933	macromolecular complex subunit organization	Pre-symbiosis (24 hour)	1	1	1	AT2G46560
GO:0071826	ribonucleoprotein complex subunit organization	Pre-symbiosis (24 hour)	1	1	1	AT3G03340
GO:0071824	protein-DNA complex subunit organization	Pre-symbiosis (24 hour)	1	1	2	AT4G32820,AT5G16690
GO:0071822	protein complex subunit organization	Pre-symbiosis (24 hour)	1	1	17	AT1G21170,AT1G21460,AT1G29170,AT2G22370,AT2G41620,AT2G46560,AT3G15095,AT3G17880,AT3G28700,AT3G43610,AT4G13510,AT4G14570,AT4G19006,AT5G23660,AT5G55630,AT5G56280,AT5G58220
GO:0061024	membrane organization	Pre-symbiosis (24 hour)	1	1	8	AT2G29530,AT2G30710,AT2G45200,AT3G24350,AT3G47450,AT4G28390,AT4G31430,AT5G46860
GO:0061025	membrane fusion	Pre-symbiosis (24 hour)	1	1	4	AT2G30710,AT2G45200,AT3G24350,AT5G46860
GO:0022411	cellular component disassembly	Pre-symbiosis (24 hour)	1	1	1	AT2G22370
GO:0032984	macromolecular complex disassembly	Pre-symbiosis (24 hour)	1	1	1	AT2G22370
GO:0043241	protein complex disassembly	Pre-symbiosis (24 hour)	1	1	1	AT2G22370
GO:0045229	external encapsulating structure organization	Pre-symbiosis (24 hour)	1	1	12	AT1G69500,AT2G20650,AT3G07160,AT3G08550,AT4G04920,AT4G23100,AT4G28370,AT4G33870,AT4G34850,AT5G41040,AT5G44070,AT5G54690
GO:0071555	cell wall organization	Pre-symbiosis (24 hour)	1	1	7	AT2G20650,AT3G08550,AT4G04920,AT4G23100,AT4G28370,AT5G44070,AT5G54690
GO:0042545	cell wall modification	Pre-symbiosis (24 hour)	1	1	5	AT2G20650,AT3G08550,AT4G23100,AT4G28370,AT5G44070
GO:0052386	cell wall thickening	Pre-symbiosis (24 hour)	1	1	3	AT3G07160,AT4G23100,AT5G44070
GO:0052482	defense response by cell wall thickening	Pre-symbiosis (24 hour)	1	1	2	AT4G23100,AT5G44070
GO:0052543	callose deposition in cell wall	Pre-symbiosis (24 hour)	1	1	3	AT3G07160,AT4G23100,AT5G44070
GO:0052544	defense response by callose deposition in cell wall	Pre-symbiosis (24 hour)	1	1	2	AT4G23100,AT5G44070
GO:0009664	plant-type cell wall organization	Pre-symbiosis (24 hour)	1	1	2	AT3G08550,AT4G04920
GO:0009827	plant-type cell wall modification	Pre-symbiosis (24 hour)	1	1	3	AT2G20650,AT3G08550,AT4G28370
GO:0052546	cell wall pectin metabolic process	Pre-symbiosis (24 hour)	1	1	1	AT4G04920
GO:0052325	cell wall pectin biosynthetic process	Pre-symbiosis (24 hour)	1	1	1	AT5G41040
GO:0043062	extracellular structure organization	Pre-symbiosis (24 hour)	1	1	1	AT3G08550
GO:0030198	extracellular matrix organization	Pre-symbiosis (24 hour)	1	1	1	AT3G08550
GO:0030030	cell projection organization	Pre-symbiosis (24 hour)	1	1	2	AT3G19990,AT5G20110
GO:0120036	plasma membrane bounded cell projection organization	Pre-symbiosis (24 hour)	1	1	2	AT3G19990,AT5G20110
GO:0034330	cell junction organization	Pre-symbiosis (24 hour)	1	1	1	AT3G08550
GO:0045216	cell-cell junction organization	Pre-symbiosis (24 hour)	1	1	1	AT3G08550
GO:0009663	plasmodesma organization	Pre-symbiosis (24 hour)	1	1	1	AT3G08550
GO:0032535	regulation of cellular component size	Pre-symbiosis (24 hour)	1	1	1	AT1G33240
GO:0008361	regulation of cell size	Pre-symbiosis (24 hour)	1	1	1	AT1G33240
GO:0006884	cell volume homeostasis	Pre-symbiosis (24 hour)	1	1	1	AT1G21270
GO:0009992	cellular water homeostasis	Pre-symbiosis (24 hour)	1	1	1	AT1G21270
GO:0022607	cellular component assembly	Pre-symbiosis (24 hour)	1	1	14	AT1G21460,AT1G29170,AT2G41620,AT2G46560,AT3G03340,AT3G08550,AT3G15095,AT3G43610,AT4G13510,AT4G22140,AT4G32820,AT5G16690,AT5G20110,AT5G55630
GO:0030031	cell projection assembly	Pre-symbiosis (24 hour)	1	1	1	AT5G20110
GO:0120031	plasma membrane bounded cell projection assembly	Pre-symbiosis (24 hour)	1	1	1	AT5G20110
GO:0065003	macromolecular complex assembly	Pre-symbiosis (24 hour)	1	1	1	AT2G46560
GO:0034622	cellular macromolecular complex assembly	Pre-symbiosis (24 hour)	1	1	1	AT2G46560
GO:0065004	protein-DNA complex assembly	Pre-symbiosis (24 hour)	1	1	2	AT4G32820,AT5G16690
GO:0036388	pre-replicative complex assembly	Pre-symbiosis (24 hour)	1	1	1	AT5G16690
GO:1902299	pre-replicative complex assembly involved in cell cycle DNA replication	Pre-symbiosis (24 hour)	1	1	1	AT5G16690
GO:0006267	pre-replicative complex assembly involved in nuclear cell cycle DNA replication	Pre-symbiosis (24 hour)	1	1	1	AT5G16690
GO:0022618	ribonucleoprotein complex assembly	Pre-symbiosis (24 hour)	1	1	1	AT3G03340
GO:0000245	spliceosomal complex assembly	Pre-symbiosis (24 hour)	1	1	1	AT3G03340
GO:0006376	mRNA splice site selection	Pre-symbiosis (24 hour)	1	1	1	AT3G03340
GO:0090735	DNA repair complex assembly	Pre-symbiosis (24 hour)	1	1	1	AT3G22880
GO:0000730	DNA recombinase assembly	Pre-symbiosis (24 hour)	1	1	1	AT3G22880
GO:0006461	protein complex assembly	Pre-symbiosis (24 hour)	1	1	17	AT1G21170,AT1G21460,AT1G29170,AT2G22370,AT2G41620,AT2G46560,AT3G15095,AT3G17880,AT3G28700,AT3G43610,AT4G13510,AT4G14570,AT4G19006,AT5G23660,AT5G55630,AT5G56280,AT5G58220
GO:0046931	pore complex assembly	Pre-symbiosis (24 hour)	1	1	1	AT2G41620
GO:0043623	cellular protein complex assembly	Pre-symbiosis (24 hour)	1	1	6	AT1G29170,AT2G41620,AT2G46560,AT3G15095,AT3G43610,AT4G13510
GO:0070071	proton-transporting two-sector ATPase complex assembly	Pre-symbiosis (24 hour)	1	1	1	AT2G46560
GO:0070070	proton-transporting V-type ATPase complex assembly	Pre-symbiosis (24 hour)	1	1	1	AT2G46560
GO:0070072	vacuolar proton-transporting V-type ATPase complex assembly	Pre-symbiosis (24 hour)	1	1	1	AT2G46560
GO:0043248	proteasome assembly	Pre-symbiosis (24 hour)	1	1	1	AT4G19006
GO:0010257	NADH dehydrogenase complex assembly	Pre-symbiosis (24 hour)	1	1	1	AT3G28700
GO:0010387	COP9 signalosome assembly	Pre-symbiosis (24 hour)	1	1	1	AT5G56280
GO:0051258	protein polymerization	Pre-symbiosis (24 hour)	1	1	3	AT1G29170,AT3G43610,AT4G13510
GO:0010207	photosystem II assembly	Pre-symbiosis (24 hour)	1	1	1	AT3G15095
GO:0001927	exocyst assembly	Pre-symbiosis (24 hour)	1	1	1	AT1G21170
GO:0051259	protein oligomerization	Pre-symbiosis (24 hour)	1	1	6	AT1G21460,AT3G17880,AT4G14570,AT5G23660,AT5G55630,AT5G58220
GO:0051262	protein tetramerization	Pre-symbiosis (24 hour)	1	1	2	AT4G14570,AT5G58220
GO:0051289	protein homotetramerization	Pre-symbiosis (24 hour)	1	1	2	AT4G14570,AT5G58220
GO:0085029	extracellular matrix assembly	Pre-symbiosis (24 hour)	1	1	2	AT1G69500,AT4G34850
GO:0070726	cell wall assembly	Pre-symbiosis (24 hour)	1	1	1	AT3G08550
GO:0071668	plant-type cell wall assembly	Pre-symbiosis (24 hour)	1	1	1	AT3G08550
GO:0010215	cellulose microfibril organization	Pre-symbiosis (24 hour)	1	1	1	AT3G08550
GO:0000919	cell plate assembly	Pre-symbiosis (24 hour)	1	1	2	AT5G11040,AT5G19390
GO:0032989	cellular component morphogenesis	Pre-symbiosis (24 hour)	1	1	7	AT1G33240,AT1G80350,AT3G08550,AT3G48820,AT3G57670,AT4G33200,AT5G40330
GO:0010927	cellular component assembly involved in morphogenesis	Pre-symbiosis (24 hour)	1	1	2	AT1G69500,AT4G34850
GO:0010208	pollen wall assembly	Pre-symbiosis (24 hour)	1	1	2	AT1G69500,AT4G34850
GO:0010584	pollen exine formation	Pre-symbiosis (24 hour)	1	1	2	AT1G69500,AT4G34850
GO:0080110	sporopollenin biosynthetic process	Pre-symbiosis (24 hour)	1	1	2	AT1G69500,AT4G34850
GO:0000902	cell morphogenesis	Pre-symbiosis (24 hour)	1	1	7	AT1G33240,AT1G80350,AT3G08550,AT3G48820,AT3G57670,AT4G33200,AT5G40330
GO:0000904	cell morphogenesis involved in differentiation	Pre-symbiosis (24 hour)	1	1	5	AT1G33240,AT1G80350,AT3G48820,AT3G57670,AT5G40330
GO:0010090	trichome morphogenesis	Pre-symbiosis (24 hour)	1	1	3	AT1G33240,AT1G80350,AT5G40330
GO:0010091	trichome branching	Pre-symbiosis (24 hour)	1	1	2	AT1G80350,AT5G40330
GO:0006996	organelle organization	Pre-symbiosis (24 hour)	1	1	21	AT1G11060,AT1G29170,AT1G47720,AT1G80350,AT2G19950,AT2G23380,AT2G33560,AT2G41620,AT3G10390,AT3G19990,AT3G27100,AT3G43610,AT3G47450,AT3G54610,AT4G22140,AT4G31270,AT4G31400,AT4G32820,AT5G20110,AT5G42480,AT5G62810
GO:0048284	organelle fusion	Pre-symbiosis (24 hour)	1	1	4	AT2G30710,AT2G45200,AT3G24350,AT5G46860
GO:0090174	organelle membrane fusion	Pre-symbiosis (24 hour)	1	1	4	AT2G30710,AT2G45200,AT3G24350,AT5G46860
GO:0048285	organelle fission	Pre-symbiosis (24 hour)	1	1	13	AT1G11060,AT1G20830,AT1G66170,AT1G77320,AT2G33560,AT3G07160,AT3G13170,AT3G22880,AT3G27730,AT3G43610,AT4G31400,AT5G19390,AT5G42480
GO:0043572	plastid fission	Pre-symbiosis (24 hour)	1	1	2	AT1G20830,AT5G42480
GO:0000280	nuclear division	Pre-symbiosis (24 hour)	1	1	11	AT1G11060,AT1G66170,AT1G77320,AT2G33560,AT3G07160,AT3G13170,AT3G22880,AT3G27730,AT3G43610,AT4G31400,AT5G19390
GO:0140014	mitotic nuclear division	Pre-symbiosis (24 hour)	1	1	4	AT1G11060,AT2G33560,AT3G43610,AT4G31400
GO:0009920	cell plate formation involved in plant-type cell wall biogenesis	Pre-symbiosis (24 hour)	1	1	1	AT5G19390
GO:0070925	organelle assembly	Pre-symbiosis (24 hour)	1	1	2	AT3G43610,AT5G20110
GO:0044782	cilium organization	Pre-symbiosis (24 hour)	1	1	2	AT3G19990,AT5G20110
GO:0042073	intraciliary transport	Pre-symbiosis (24 hour)	1	1	1	AT3G19990
GO:0035721	intraciliary retrograde transport	Pre-symbiosis (24 hour)	1	1	1	AT3G19990
GO:0060271	cilium assembly	Pre-symbiosis (24 hour)	1	1	1	AT5G20110
GO:0006997	nucleus organization	Pre-symbiosis (24 hour)	1	1	1	AT2G41620
GO:0006999	nuclear pore organization	Pre-symbiosis (24 hour)	1	1	1	AT2G41620
GO:0051292	nuclear pore complex assembly	Pre-symbiosis (24 hour)	1	1	1	AT2G41620
GO:0016050	vesicle organization	Pre-symbiosis (24 hour)	1	1	4	AT2G30710,AT2G45200,AT3G24350,AT5G46860
GO:0006906	vesicle fusion	Pre-symbiosis (24 hour)	1	1	4	AT2G30710,AT2G45200,AT3G24350,AT5G46860
GO:0007005	mitochondrion organization	Pre-symbiosis (24 hour)	1	1	5	AT1G06530,AT1G47720,AT2G29530,AT3G59280,AT4G28390
GO:0007006	mitochondrial membrane organization	Pre-symbiosis (24 hour)	1	1	2	AT2G29530,AT4G28390
GO:0007007	inner mitochondrial membrane organization	Pre-symbiosis (24 hour)	1	1	1	AT2G29530
GO:0090151	establishment of protein localization to mitochondrial membrane	Pre-symbiosis (24 hour)	1	1	1	AT2G29530
GO:0046902	regulation of mitochondrial membrane permeability	Pre-symbiosis (24 hour)	1	1	1	AT4G28390
GO:0000002	mitochondrial genome maintenance	Pre-symbiosis (24 hour)	1	1	1	AT1G47720
GO:0033108	mitochondrial respiratory chain complex assembly	Pre-symbiosis (24 hour)	1	1	1	AT3G28700
GO:0032981	mitochondrial respiratory chain complex I assembly	Pre-symbiosis (24 hour)	1	1	1	AT3G28700
GO:0006626	protein targeting to mitochondrion	Pre-symbiosis (24 hour)	1	1	2	AT2G29530,AT3G59280
GO:0030150	protein import into mitochondrial matrix	Pre-symbiosis (24 hour)	1	1	1	AT3G59280
GO:0045039	protein import into mitochondrial inner membrane	Pre-symbiosis (24 hour)	1	1	1	AT2G29530
GO:0009657	plastid organization	Pre-symbiosis (24 hour)	1	1	1	AT5G42480
GO:0009668	plastid membrane organization	Pre-symbiosis (24 hour)	1	1	1	AT3G47450
GO:0010027	thylakoid membrane organization	Pre-symbiosis (24 hour)	1	1	1	AT3G47450
GO:0009660	amyloplast organization	Pre-symbiosis (24 hour)	1	1	1	AT5G46860
GO:0009658	chloroplast organization	Pre-symbiosis (24 hour)	1	1	1	AT5G42480
GO:0010020	chloroplast fission	Pre-symbiosis (24 hour)	1	1	2	AT1G20830,AT5G42480
GO:0009902	chloroplast relocation	Pre-symbiosis (24 hour)	1	1	2	AT2G26570,AT5G20610
GO:0009903	chloroplast avoidance movement	Pre-symbiosis (24 hour)	1	1	2	AT2G26570,AT5G20610
GO:0009904	chloroplast accumulation movement	Pre-symbiosis (24 hour)	1	1	1	AT2G26570
GO:0007010	cytoskeleton organization	Pre-symbiosis (24 hour)	1	1	3	AT1G29170,AT1G80350,AT3G43610
GO:0030865	cortical cytoskeleton organization	Pre-symbiosis (24 hour)	1	1	1	AT1G80350
GO:0030036	actin cytoskeleton organization	Pre-symbiosis (24 hour)	1	1	1	AT1G29170
GO:0007015	actin filament organization	Pre-symbiosis (24 hour)	1	1	1	AT1G29170
GO:0008154	actin polymerization or depolymerization	Pre-symbiosis (24 hour)	1	1	1	AT1G29170
GO:0030041	actin filament polymerization	Pre-symbiosis (24 hour)	1	1	1	AT1G29170
GO:0000226	microtubule cytoskeleton organization	Pre-symbiosis (24 hour)	1	1	2	AT1G80350,AT3G43610
GO:0031109	microtubule polymerization or depolymerization	Pre-symbiosis (24 hour)	1	1	1	AT3G43610
GO:0046785	microtubule polymerization	Pre-symbiosis (24 hour)	1	1	1	AT3G43610
GO:1902850	microtubule cytoskeleton organization involved in mitosis	Pre-symbiosis (24 hour)	1	1	1	AT3G43610
GO:0031122	cytoplasmic microtubule organization	Pre-symbiosis (24 hour)	1	1	2	AT1G80350,AT3G43610
GO:0043622	cortical microtubule organization	Pre-symbiosis (24 hour)	1	1	1	AT1G80350
GO:0007051	spindle organization	Pre-symbiosis (24 hour)	1	1	1	AT3G43610
GO:0007052	mitotic spindle organization	Pre-symbiosis (24 hour)	1	1	1	AT3G43610
GO:0051225	spindle assembly	Pre-symbiosis (24 hour)	1	1	1	AT3G43610
GO:0090307	mitotic spindle assembly	Pre-symbiosis (24 hour)	1	1	1	AT3G43610
GO:0007020	microtubule nucleation	Pre-symbiosis (24 hour)	1	1	1	AT3G43610
GO:0051418	microtubule nucleation by microtubule organizing center	Pre-symbiosis (24 hour)	1	1	1	AT3G43610
GO:0051415	interphase microtubule nucleation by interphase microtubule organizing center	Pre-symbiosis (24 hour)	1	1	1	AT3G43610
GO:0007031	peroxisome organization	Pre-symbiosis (24 hour)	1	1	1	AT5G62810
GO:0072662	protein localization to peroxisome	Pre-symbiosis (24 hour)	1	1	1	AT5G62810
GO:0072663	establishment of protein localization to peroxisome	Pre-symbiosis (24 hour)	1	1	1	AT5G62810
GO:0006625	protein targeting to peroxisome	Pre-symbiosis (24 hour)	1	1	1	AT5G62810
GO:0016558	protein import into peroxisome matrix	Pre-symbiosis (24 hour)	1	1	1	AT5G62810
GO:0016560	protein import into peroxisome matrix, docking	Pre-symbiosis (24 hour)	1	1	1	AT5G62810
GO:0051276	chromosome organization	Pre-symbiosis (24 hour)	1	1	11	AT1G11060,AT2G23380,AT2G27040,AT2G33560,AT3G10390,AT3G27100,AT3G54610,AT4G22140,AT4G31270,AT4G31400,AT4G32820
GO:0071103	DNA conformation change	Pre-symbiosis (24 hour)	1	1	3	AT1G11060,AT4G22140,AT4G32820
GO:0032392	DNA geometric change	Pre-symbiosis (24 hour)	1	1	1	AT1G27880
GO:0032508	DNA duplex unwinding	Pre-symbiosis (24 hour)	1	1	1	AT1G27880
GO:0006323	DNA packaging	Pre-symbiosis (24 hour)	1	1	3	AT1G11060,AT4G22140,AT4G32820
GO:0030261	chromosome condensation	Pre-symbiosis (24 hour)	1	1	2	AT1G11060,AT1G66170
GO:0000819	sister chromatid segregation	Pre-symbiosis (24 hour)	1	1	3	AT1G11060,AT2G33560,AT4G31400
GO:0000070	mitotic sister chromatid segregation	Pre-symbiosis (24 hour)	1	1	3	AT1G11060,AT2G33560,AT4G31400
GO:0051306	mitotic sister chromatid separation	Pre-symbiosis (24 hour)	1	1	1	AT2G33560
GO:0007062	sister chromatid cohesion	Pre-symbiosis (24 hour)	1	1	3	AT1G11060,AT2G33560,AT4G31400
GO:0071921	cohesin loading	Pre-symbiosis (24 hour)	1	1	1	AT1G11060
GO:0070601	centromeric sister chromatid cohesion	Pre-symbiosis (24 hour)	1	1	1	AT2G33560
GO:0007064	mitotic sister chromatid cohesion	Pre-symbiosis (24 hour)	1	1	1	AT1G11060
GO:0010256	endomembrane system organization	Pre-symbiosis (24 hour)	1	1	1	AT2G19950
GO:0007030	Golgi organization	Pre-symbiosis (24 hour)	1	1	1	AT2G19950
GO:0006998	nuclear envelope organization	Pre-symbiosis (24 hour)	1	1	1	AT4G31430
GO:0071763	nuclear membrane organization	Pre-symbiosis (24 hour)	1	1	1	AT4G31430
GO:0006325	chromatin organization	Pre-symbiosis (24 hour)	1	1	13	AT1G05910,AT2G22370,AT2G23380,AT2G27040,AT3G10390,AT3G27100,AT3G49250,AT3G54610,AT4G22140,AT4G31270,AT4G32820,AT5G04290,AT5G14620
GO:0006338	chromatin remodeling	Pre-symbiosis (24 hour)	1	1	1	AT4G22140
GO:0006333	chromatin assembly or disassembly	Pre-symbiosis (24 hour)	1	1	2	AT4G22140,AT4G32820
GO:0031497	chromatin assembly	Pre-symbiosis (24 hour)	1	1	2	AT4G22140,AT4G32820
GO:0070828	heterochromatin organization	Pre-symbiosis (24 hour)	1	1	1	AT4G22140
GO:0031507	heterochromatin assembly	Pre-symbiosis (24 hour)	1	1	1	AT4G22140
GO:0034728	nucleosome organization	Pre-symbiosis (24 hour)	1	1	1	AT4G32820
GO:0034724	DNA replication-independent nucleosome organization	Pre-symbiosis (24 hour)	1	1	1	AT4G32820
GO:0006334	nucleosome assembly	Pre-symbiosis (24 hour)	1	1	1	AT4G32820
GO:0006336	DNA replication-independent nucleosome assembly	Pre-symbiosis (24 hour)	1	1	1	AT4G32820
GO:0016569	covalent chromatin modification	Pre-symbiosis (24 hour)	1	1	6	AT2G23380,AT2G27040,AT3G10390,AT3G27100,AT3G54610,AT4G22140
GO:0016570	histone modification	Pre-symbiosis (24 hour)	1	1	6	AT2G23380,AT2G27040,AT3G10390,AT3G27100,AT3G54610,AT4G22140
GO:0061647	histone H3-K9 modification	Pre-symbiosis (24 hour)	1	1	2	AT2G27040,AT5G14620
GO:0016575	histone deacetylation	Pre-symbiosis (24 hour)	1	1	1	AT3G10390
GO:0016578	histone deubiquitination	Pre-symbiosis (24 hour)	1	1	1	AT3G27100
GO:0016571	histone methylation	Pre-symbiosis (24 hour)	1	1	5	AT2G22370,AT2G23380,AT2G27040,AT3G20740,AT5G14620
GO:0034968	histone lysine methylation	Pre-symbiosis (24 hour)	1	1	3	AT2G22370,AT2G27040,AT5G14620
GO:0010452	histone H3-K36 methylation	Pre-symbiosis (24 hour)	1	1	1	AT2G22370
GO:0097198	histone H3-K36 trimethylation	Pre-symbiosis (24 hour)	1	1	1	AT2G22370
GO:0051567	histone H3-K9 methylation	Pre-symbiosis (24 hour)	1	1	2	AT2G27040,AT5G14620
GO:0016573	histone acetylation	Pre-symbiosis (24 hour)	1	1	2	AT3G54610,AT4G22140
GO:0019740	nitrogen utilization	Pre-symbiosis (24 hour)	1	1	1	AT5G35630
GO:0019676	ammonia assimilation cycle	Pre-symbiosis (24 hour)	1	1	1	AT5G35630
GO:0000003	reproduction	Pre-symbiosis (24 hour)	1	1	68	AT1G08320,AT1G11060,AT1G11190,AT1G17110,AT1G18390,AT1G18640,AT1G18750,AT1G22770,AT1G30490,AT1G67580,AT1G68480,AT1G77320,AT2G07020,AT2G22370,AT2G23380,AT2G31500,AT2G33560,AT2G34710,AT2G38280,AT2G41370,AT2G41720,AT2G43900,AT2G45660,AT3G03340,AT3G04070,AT3G06350,AT3G07160,AT3G07650,AT3G10390,AT3G13170,AT3G13300,AT3G18990,AT3G20740,AT3G23440,AT3G27730,AT3G43610,AT3G48820,AT3G54420,AT3G54610,AT3G55510…
GO:0032504	multicellular organism reproduction	Pre-symbiosis (24 hour)	1	1	10	AT1G66170,AT1G77320,AT3G07160,AT4G28370,AT4G31400,AT5G13170,AT5G23660,AT5G40010,AT5G44120,AT5G62000
GO:0040007	growth	Pre-symbiosis (24 hour)	1	1	13	AT1G18750,AT1G33240,AT1G75500,AT1G80350,AT3G08550,AT3G12380,AT3G48820,AT3G57670,AT4G23410,AT4G31400,AT5G24740,AT5G41950,AT5G63840
GO:0048589	developmental growth	Pre-symbiosis (24 hour)	1	1	11	AT1G18750,AT1G75500,AT3G08550,AT3G12380,AT3G48820,AT3G57670,AT4G23410,AT4G31400,AT5G24740,AT5G41950,AT5G63840
GO:0080186	developmental vegetative growth	Pre-symbiosis (24 hour)	1	1	1	AT4G31400
GO:0035265	organ growth	Pre-symbiosis (24 hour)	1	1	3	AT1G29420,AT1G29450,AT4G23410
GO:0060560	developmental growth involved in morphogenesis	Pre-symbiosis (24 hour)	1	1	7	AT1G18750,AT1G75500,AT3G08550,AT3G48820,AT3G57670,AT5G41950,AT5G63840
GO:0035266	meristem growth	Pre-symbiosis (24 hour)	1	1	2	AT3G12380,AT5G24740
GO:0010449	root meristem growth	Pre-symbiosis (24 hour)	1	1	2	AT3G12380,AT5G24740
GO:0016049	cell growth	Pre-symbiosis (24 hour)	1	1	5	AT1G33240,AT1G80350,AT3G08550,AT3G48820,AT3G57670
GO:0048588	developmental cell growth	Pre-symbiosis (24 hour)	1	1	4	AT1G18750,AT3G48820,AT3G57670,AT5G41950
GO:0048767	root hair elongation	Pre-symbiosis (24 hour)	1	1	1	AT5G41950
GO:0009825	multidimensional cell growth	Pre-symbiosis (24 hour)	1	1	2	AT1G80350,AT3G08550
GO:0042547	cell wall modification involved in multidimensional cell growth	Pre-symbiosis (24 hour)	1	1	1	AT3G08550
GO:0009831	plant-type cell wall modification involved in multidimensional cell growth	Pre-symbiosis (24 hour)	1	1	1	AT3G08550
GO:0009826	unidimensional cell growth	Pre-symbiosis (24 hour)	1	1	7	AT1G18750,AT1G75500,AT3G08550,AT3G48820,AT3G57670,AT5G41950,AT5G63840
GO:0009932	cell tip growth	Pre-symbiosis (24 hour)	1	1	9	AT1G18750,AT2G07020,AT2G31500,AT3G07160,AT3G48820,AT3G57670,AT4G12420,AT5G41950,AT5G55810
GO:0048768	root hair cell tip growth	Pre-symbiosis (24 hour)	1	1	1	AT5G41950
GO:0032878	regulation of establishment or maintenance of cell polarity	Pre-symbiosis (24 hour)	1	1	1	AT4G33200
GO:0010646	regulation of cell communication	Pre-symbiosis (24 hour)	1	1	3	AT3G12380,AT3G17980,AT4G04920
GO:0051983	regulation of chromosome segregation	Pre-symbiosis (24 hour)	1	1	2	AT1G11060,AT2G33560
GO:0051128	regulation of cellular component organization	Pre-symbiosis (24 hour)	1	1	10	AT1G11060,AT1G18750,AT1G29170,AT1G33240,AT2G33560,AT3G08550,AT4G04920,AT4G22140,AT4G31270,AT4G33200
GO:0033043	regulation of organelle organization	Pre-symbiosis (24 hour)	1	1	5	AT1G11060,AT1G29170,AT2G33560,AT4G22140,AT4G31270
GO:0051493	regulation of cytoskeleton organization	Pre-symbiosis (24 hour)	1	1	1	AT1G29170
GO:0033044	regulation of chromosome organization	Pre-symbiosis (24 hour)	1	1	7	AT1G05910,AT1G11060,AT2G22370,AT2G33560,AT3G49250,AT4G22140,AT4G31270
GO:1902275	regulation of chromatin organization	Pre-symbiosis (24 hour)	1	1	5	AT1G05910,AT2G22370,AT3G49250,AT4G22140,AT4G31270
GO:0060623	regulation of chromosome condensation	Pre-symbiosis (24 hour)	1	1	1	AT1G11060
GO:0051783	regulation of nuclear division	Pre-symbiosis (24 hour)	1	1	1	AT2G33560
GO:0043244	regulation of protein complex disassembly	Pre-symbiosis (24 hour)	1	1	1	AT2G22370
GO:1902903	regulation of supramolecular fiber organization	Pre-symbiosis (24 hour)	1	1	1	AT1G29170
GO:0032970	regulation of actin filament-based process	Pre-symbiosis (24 hour)	1	1	1	AT1G29170
GO:0032956	regulation of actin cytoskeleton organization	Pre-symbiosis (24 hour)	1	1	1	AT1G29170
GO:0030832	regulation of actin filament length	Pre-symbiosis (24 hour)	1	1	1	AT1G29170
GO:0110053	regulation of actin filament organization	Pre-symbiosis (24 hour)	1	1	1	AT1G29170
GO:0008064	regulation of actin polymerization or depolymerization	Pre-symbiosis (24 hour)	1	1	1	AT1G29170
GO:0010941	regulation of cell death	Pre-symbiosis (24 hour)	1	1	1	AT5G10530
GO:1903338	regulation of cell wall organization or biogenesis	Pre-symbiosis (24 hour)	1	1	2	AT3G08550,AT4G04920
GO:0010119	regulation of stomatal movement	Pre-symbiosis (24 hour)	1	1	2	AT3G05030,AT5G13750
GO:1902456	regulation of stomatal opening	Pre-symbiosis (24 hour)	1	1	2	AT4G22790,AT4G33950
GO:0042127	regulation of cell proliferation	Pre-symbiosis (24 hour)	1	1	1	AT5G62000
GO:0051726	regulation of cell cycle	Pre-symbiosis (24 hour)	1	1	1	AT1G33240
GO:0010564	regulation of cell cycle process	Pre-symbiosis (24 hour)	1	1	1	AT1G33240
GO:1901987	regulation of cell cycle phase transition	Pre-symbiosis (24 hour)	1	1	1	AT2G33560
GO:1905818	regulation of chromosome separation	Pre-symbiosis (24 hour)	1	1	1	AT2G33560
GO:0033045	regulation of sister chromatid segregation	Pre-symbiosis (24 hour)	1	1	2	AT1G11060,AT2G33560
GO:0007063	regulation of sister chromatid cohesion	Pre-symbiosis (24 hour)	1	1	1	AT1G11060
GO:0044784	metaphase/anaphase transition of cell cycle	Pre-symbiosis (24 hour)	1	1	1	AT2G33560
GO:1902099	regulation of metaphase/anaphase transition of cell cycle	Pre-symbiosis (24 hour)	1	1	1	AT2G33560
GO:0007346	regulation of mitotic cell cycle	Pre-symbiosis (24 hour)	1	1	3	AT1G06230,AT1G67580,AT2G33560
GO:1901990	regulation of mitotic cell cycle phase transition	Pre-symbiosis (24 hour)	1	1	1	AT2G33560
GO:0007088	regulation of mitotic nuclear division	Pre-symbiosis (24 hour)	1	1	1	AT2G33560
GO:0033047	regulation of mitotic sister chromatid segregation	Pre-symbiosis (24 hour)	1	1	1	AT2G33560
GO:0010965	regulation of mitotic sister chromatid separation	Pre-symbiosis (24 hour)	1	1	1	AT2G33560
GO:0007091	metaphase/anaphase transition of mitotic cell cycle	Pre-symbiosis (24 hour)	1	1	1	AT2G33560
GO:0030071	regulation of mitotic metaphase/anaphase transition	Pre-symbiosis (24 hour)	1	1	1	AT2G33560
GO:0030522	intracellular receptor signaling pathway	Pre-symbiosis (24 hour)	1	1	1	AT5G20730
GO:0009785	blue light signaling pathway	Pre-symbiosis (24 hour)	1	1	1	AT5G20730
GO:0009756	carbohydrate mediated signaling	Pre-symbiosis (24 hour)	1	1	2	AT2G13600,AT3G20770
GO:0010182	sugar mediated signaling pathway	Pre-symbiosis (24 hour)	1	1	2	AT2G13600,AT3G20770
GO:0007602	phototransduction	Pre-symbiosis (24 hour)	1	1	2	AT1G52520,AT3G59470
GO:0035556	intracellular signal transduction	Pre-symbiosis (24 hour)	1	1	3	AT3G20770,AT3G63340,AT4G04920
GO:0019932	second-messenger-mediated signaling	Pre-symbiosis (24 hour)	1	1	5	AT2G29100,AT2G29120,AT4G03560,AT4G35290,AT5G48400
GO:0019722	calcium-mediated signaling	Pre-symbiosis (24 hour)	1	1	5	AT2G29100,AT2G29120,AT4G03560,AT4G35290,AT5G48400
GO:0000160	phosphorelay signal transduction system	Pre-symbiosis (24 hour)	1	1	2	AT3G20770,AT4G04920
GO:0007186	G-protein coupled receptor signaling pathway	Pre-symbiosis (24 hour)	1	1	1	AT2G23460
GO:0007187	G-protein coupled receptor signaling pathway, coupled to cyclic nucleotide second messenger	Pre-symbiosis (24 hour)	1	1	1	AT2G23460
GO:0007188	adenylate cyclase-modulating G-protein coupled receptor signaling pathway	Pre-symbiosis (24 hour)	1	1	1	AT2G23460
GO:0071588	hydrogen peroxide mediated signaling pathway	Pre-symbiosis (24 hour)	1	1	1	AT1G08320
GO:0009755	hormone-mediated signaling pathway	Pre-symbiosis (24 hour)	1	1	6	AT1G04120,AT2G41370,AT3G17980,AT3G20770,AT4G04920,AT4G23980
GO:0043401	steroid hormone mediated signaling pathway	Pre-symbiosis (24 hour)	1	1	2	AT1G63500,AT5G58220
GO:0009742	brassinosteroid mediated signaling pathway	Pre-symbiosis (24 hour)	1	1	2	AT1G63500,AT5G58220
GO:0009734	auxin-activated signaling pathway	Pre-symbiosis (24 hour)	1	1	2	AT1G75500,AT4G23980
GO:0009736	cytokinin-activated signaling pathway	Pre-symbiosis (24 hour)	1	1	1	AT3G12380
GO:0009873	ethylene-activated signaling pathway	Pre-symbiosis (24 hour)	1	1	2	AT3G20770,AT4G04920
GO:0009867	jasmonic acid mediated signaling pathway	Pre-symbiosis (24 hour)	1	1	4	AT2G41370,AT3G23240,AT4G02570,AT4G04920
GO:0010476	gibberellin mediated signaling pathway	Pre-symbiosis (24 hour)	1	1	2	AT1G68360,AT1G79460
GO:0009740	gibberellic acid mediated signaling pathway	Pre-symbiosis (24 hour)	1	1	2	AT1G68360,AT1G79460
GO:0009738	abscisic acid-activated signaling pathway	Pre-symbiosis (24 hour)	1	1	10	AT1G04120,AT1G62810,AT2G26040,AT2G26980,AT2G31500,AT2G33540,AT2G39550,AT3G17980,AT4G33950,AT5G66880
GO:1901527	abscisic acid-activated signaling pathway involved in stomatal movement	Pre-symbiosis (24 hour)	1	1	1	AT1G04120
GO:0010017	red or far-red light signaling pathway	Pre-symbiosis (24 hour)	1	1	2	AT1G52520,AT3G59470
GO:0010018	far-red light signaling pathway	Pre-symbiosis (24 hour)	1	1	2	AT1G52520,AT3G59470
GO:0009585	red, far-red light phototransduction	Pre-symbiosis (24 hour)	1	1	2	AT1G52520,AT3G59470
GO:0030968	endoplasmic reticulum unfolded protein response	Pre-symbiosis (24 hour)	1	1	2	AT1G42990,AT2G17520
GO:0009863	salicylic acid mediated signaling pathway	Pre-symbiosis (24 hour)	1	1	1	AT3G50930
GO:0051239	regulation of multicellular organismal process	Pre-symbiosis (24 hour)	1	1	12	AT1G18750,AT1G33240,AT2G45660,AT3G07650,AT3G12380,AT3G18990,AT3G54610,AT4G04920,AT4G19040,AT4G22140,AT5G24740,AT5G55630
GO:0032879	regulation of localization	Pre-symbiosis (24 hour)	1	1	9	AT1G11060,AT2G30710,AT2G31500,AT2G45200,AT3G59280,AT4G05590,AT4G33950,AT5G20480,AT5G62000
GO:0060341	regulation of cellular localization	Pre-symbiosis (24 hour)	1	1	2	AT1G11060,AT2G45200
GO:0051049	regulation of transport	Pre-symbiosis (24 hour)	1	1	8	AT2G30710,AT2G31500,AT2G45200,AT3G59280,AT4G05590,AT4G33950,AT5G20480,AT5G62000
GO:1902007	regulation of toxin transport	Pre-symbiosis (24 hour)	1	1	1	AT3G59280
GO:0032409	regulation of transporter activity	Pre-symbiosis (24 hour)	1	1	4	AT2G31500,AT4G05590,AT4G33950,AT5G20480
GO:0022898	regulation of transmembrane transporter activity	Pre-symbiosis (24 hour)	1	1	4	AT2G31500,AT4G05590,AT4G33950,AT5G20480
GO:0043269	regulation of ion transport	Pre-symbiosis (24 hour)	1	1	5	AT2G31500,AT4G05590,AT4G33950,AT5G20480,AT5G62000
GO:0010959	regulation of metal ion transport	Pre-symbiosis (24 hour)	1	1	3	AT2G31500,AT4G05590,AT5G62000
GO:0043266	regulation of potassium ion transport	Pre-symbiosis (24 hour)	1	1	3	AT2G31500,AT4G05590,AT5G62000
GO:0044070	regulation of anion transport	Pre-symbiosis (24 hour)	1	1	3	AT4G05590,AT4G33950,AT5G20480
GO:1903286	regulation of potassium ion import	Pre-symbiosis (24 hour)	1	1	1	AT5G62000
GO:0032412	regulation of ion transmembrane transporter activity	Pre-symbiosis (24 hour)	1	1	4	AT2G31500,AT4G05590,AT4G33950,AT5G20480
GO:2001257	regulation of cation channel activity	Pre-symbiosis (24 hour)	1	1	1	AT2G31500
GO:1901016	regulation of potassium ion transmembrane transporter activity	Pre-symbiosis (24 hour)	1	1	2	AT2G31500,AT4G05590
GO:1903959	regulation of anion transmembrane transport	Pre-symbiosis (24 hour)	1	1	3	AT4G05590,AT4G33950,AT5G20480
GO:0010359	regulation of anion channel activity	Pre-symbiosis (24 hour)	1	1	3	AT4G05590,AT4G33950,AT5G20480
GO:0060627	regulation of vesicle-mediated transport	Pre-symbiosis (24 hour)	1	1	2	AT2G30710,AT2G45200
GO:0048209	regulation of vesicle targeting, to, from or within Golgi	Pre-symbiosis (24 hour)	1	1	1	AT2G45200
GO:0031338	regulation of vesicle fusion	Pre-symbiosis (24 hour)	1	1	1	AT2G30710
GO:2000012	regulation of auxin polar transport	Pre-symbiosis (24 hour)	1	1	1	AT3G59280
GO:0032880	regulation of protein localization	Pre-symbiosis (24 hour)	1	1	1	AT1G11060
GO:1903827	regulation of cellular protein localization	Pre-symbiosis (24 hour)	1	1	1	AT1G11060
GO:1905634	regulation of protein localization to chromatin	Pre-symbiosis (24 hour)	1	1	1	AT1G11060
GO:0071922	regulation of cohesin loading	Pre-symbiosis (24 hour)	1	1	1	AT1G11060
GO:0002697	regulation of immune effector process	Pre-symbiosis (24 hour)	1	1	1	AT5G14930
GO:0044087	regulation of cellular component biogenesis	Pre-symbiosis (24 hour)	1	1	3	AT1G29170,AT3G08550,AT4G04920
GO:0043254	regulation of protein complex assembly	Pre-symbiosis (24 hour)	1	1	1	AT1G29170
GO:0032271	regulation of protein polymerization	Pre-symbiosis (24 hour)	1	1	1	AT1G29170
GO:0030833	regulation of actin filament polymerization	Pre-symbiosis (24 hour)	1	1	1	AT1G29170
GO:2000652	regulation of secondary cell wall biogenesis	Pre-symbiosis (24 hour)	1	1	2	AT1G06920,AT4G28500
GO:0048583	regulation of response to stimulus	Pre-symbiosis (24 hour)	1	1	12	AT2G41370,AT3G07650,AT3G12380,AT3G17980,AT3G18165,AT3G25040,AT4G04920,AT4G19040,AT4G22140,AT5G13160,AT5G14420,AT5G62570
GO:0032101	regulation of response to external stimulus	Pre-symbiosis (24 hour)	1	1	9	AT2G22370,AT3G17980,AT3G59280,AT4G04920,AT4G13040,AT4G19040,AT4G35580,AT5G14930,AT5G62570
GO:1901419	regulation of response to alcohol	Pre-symbiosis (24 hour)	1	1	5	AT2G33540,AT2G39550,AT3G17980,AT3G51550,AT4G33950
GO:1905957	regulation of cellular response to alcohol	Pre-symbiosis (24 hour)	1	1	5	AT2G33540,AT2G39550,AT3G17980,AT3G51550,AT4G33950
GO:0080134	regulation of response to stress	Pre-symbiosis (24 hour)	1	1	9	AT2G41370,AT3G17980,AT3G18165,AT3G25040,AT4G04920,AT4G19040,AT5G13160,AT5G14420,AT5G62570
GO:0031347	regulation of defense response	Pre-symbiosis (24 hour)	1	1	5	AT2G41370,AT3G17980,AT3G18165,AT4G04920,AT5G62570
GO:1902288	regulation of defense response to oomycetes	Pre-symbiosis (24 hour)	1	1	2	AT3G59280,AT5G14930
GO:1900424	regulation of defense response to bacterium	Pre-symbiosis (24 hour)	1	1	6	AT3G17980,AT3G59280,AT4G13040,AT4G35580,AT5G14930,AT5G62570
GO:1900150	regulation of defense response to fungus	Pre-symbiosis (24 hour)	1	1	2	AT2G22370,AT4G19040
GO:0050688	regulation of defense response to virus	Pre-symbiosis (24 hour)	1	1	1	AT5G14930
GO:0050691	regulation of defense response to virus by host	Pre-symbiosis (24 hour)	1	1	1	AT5G14930
GO:0002230	positive regulation of defense response to virus by host	Pre-symbiosis (24 hour)	1	1	1	AT5G14930
GO:0047484	regulation of response to osmotic stress	Pre-symbiosis (24 hour)	1	1	1	AT3G17980
GO:1901000	regulation of response to salt stress	Pre-symbiosis (24 hour)	1	1	1	AT3G17980
GO:0010219	regulation of vernalization response	Pre-symbiosis (24 hour)	1	1	1	AT2G22370
GO:2000070	regulation of response to water deprivation	Pre-symbiosis (24 hour)	1	1	2	AT4G05590,AT5G14420
GO:0010112	regulation of systemic acquired resistance	Pre-symbiosis (24 hour)	1	1	1	AT4G04920
GO:0002764	immune response-regulating signaling pathway	Pre-symbiosis (24 hour)	1	1	2	AT5G13160,AT5G20480
GO:0023051	regulation of signaling	Pre-symbiosis (24 hour)	1	1	3	AT3G12380,AT3G17980,AT4G04920
GO:0009966	regulation of signal transduction	Pre-symbiosis (24 hour)	1	1	3	AT3G12380,AT3G17980,AT4G04920
GO:0010469	regulation of receptor activity	Pre-symbiosis (24 hour)	1	1	1	AT2G31500
GO:1901979	regulation of inward rectifier potassium channel activity	Pre-symbiosis (24 hour)	1	1	1	AT2G31500
GO:1902531	regulation of intracellular signal transduction	Pre-symbiosis (24 hour)	1	1	1	AT4G04920
GO:0070297	regulation of phosphorelay signal transduction system	Pre-symbiosis (24 hour)	1	1	1	AT4G04920
GO:0010104	regulation of ethylene-activated signaling pathway	Pre-symbiosis (24 hour)	1	1	1	AT4G04920
GO:0010928	regulation of auxin mediated signaling pathway	Pre-symbiosis (24 hour)	1	1	1	AT1G75500
GO:0010315	auxin efflux	Pre-symbiosis (24 hour)	1	1	1	AT1G75500
GO:0080036	regulation of cytokinin-activated signaling pathway	Pre-symbiosis (24 hour)	1	1	1	AT3G12380
GO:2000031	regulation of salicylic acid mediated signaling pathway	Pre-symbiosis (24 hour)	1	1	1	AT2G43710
GO:2000022	regulation of jasmonic acid mediated signaling pathway	Pre-symbiosis (24 hour)	1	1	1	AT4G04920
GO:0009787	regulation of abscisic acid-activated signaling pathway	Pre-symbiosis (24 hour)	1	1	5	AT2G33540,AT2G39550,AT3G17980,AT3G51550,AT4G33950
GO:0048519	negative regulation of biological process	Pre-symbiosis (24 hour)	1	1	42	AT1G02970,AT1G05910,AT1G06920,AT1G08370,AT1G09700,AT1G14790,AT1G33240,AT1G47710,AT1G47720,AT1G50410,AT2G22090,AT2G22370,AT2G27040,AT2G30470,AT2G32710,AT2G33540,AT2G33560,AT2G39550,AT2G39740,AT3G07650,AT3G07750,AT3G13300,AT3G49250,AT3G59280,AT4G04020,AT4G05590,AT4G19040,AT4G22140,AT4G26840,AT4G31270,AT4G35580,AT4G36990,AT5G04290,AT5G14420,AT5G14620,AT5G21160,AT5G47010,AT5G48820,AT5G58130,AT5G62570…
GO:0051051	negative regulation of transport	Pre-symbiosis (24 hour)	1	1	1	AT4G05590
GO:0032410	negative regulation of transporter activity	Pre-symbiosis (24 hour)	1	1	1	AT4G05590
GO:0043271	negative regulation of ion transport	Pre-symbiosis (24 hour)	1	1	1	AT4G05590
GO:0043267	negative regulation of potassium ion transport	Pre-symbiosis (24 hour)	1	1	1	AT4G05590
GO:1903792	negative regulation of anion transport	Pre-symbiosis (24 hour)	1	1	1	AT4G05590
GO:0034763	negative regulation of transmembrane transport	Pre-symbiosis (24 hour)	1	1	1	AT4G05590
GO:0034766	negative regulation of ion transmembrane transport	Pre-symbiosis (24 hour)	1	1	1	AT4G05590
GO:0032413	negative regulation of ion transmembrane transporter activity	Pre-symbiosis (24 hour)	1	1	1	AT4G05590
GO:1904063	negative regulation of cation transmembrane transport	Pre-symbiosis (24 hour)	1	1	1	AT4G05590
GO:1903960	negative regulation of anion transmembrane transport	Pre-symbiosis (24 hour)	1	1	1	AT4G05590
GO:0010360	negative regulation of anion channel activity	Pre-symbiosis (24 hour)	1	1	1	AT4G05590
GO:0051241	negative regulation of multicellular organismal process	Pre-symbiosis (24 hour)	1	1	3	AT3G07650,AT4G19040,AT4G22140
GO:0002683	negative regulation of immune system process	Pre-symbiosis (24 hour)	1	1	1	AT5G62570
GO:0043901	negative regulation of multi-organism process	Pre-symbiosis (24 hour)	1	1	1	AT5G62570
GO:0048523	negative regulation of cellular process	Pre-symbiosis (24 hour)	1	1	26	AT1G05910,AT1G06920,AT1G09700,AT1G33240,AT1G47710,AT1G47720,AT2G22090,AT2G22370,AT2G27040,AT2G30470,AT2G32710,AT2G33540,AT2G33560,AT2G39550,AT2G39740,AT3G49250,AT3G59280,AT4G04020,AT4G05590,AT4G22140,AT4G31270,AT4G35580,AT4G36990,AT5G04290,AT5G48820,AT5G63320
GO:0051129	negative regulation of cellular component organization	Pre-symbiosis (24 hour)	1	1	3	AT1G05910,AT2G33560,AT4G22140
GO:0010639	negative regulation of organelle organization	Pre-symbiosis (24 hour)	1	1	3	AT1G05910,AT2G33560,AT4G22140
GO:0051784	negative regulation of nuclear division	Pre-symbiosis (24 hour)	1	1	1	AT2G33560
GO:2001251	negative regulation of chromosome organization	Pre-symbiosis (24 hour)	1	1	3	AT1G05910,AT2G33560,AT4G22140
GO:1905268	negative regulation of chromatin organization	Pre-symbiosis (24 hour)	1	1	2	AT1G05910,AT4G22140
GO:0051985	negative regulation of chromosome segregation	Pre-symbiosis (24 hour)	1	1	1	AT2G33560
GO:0010648	negative regulation of cell communication	Pre-symbiosis (24 hour)	1	1	3	AT2G33540,AT2G39550,AT3G51550
GO:1901380	negative regulation of potassium ion transmembrane transport	Pre-symbiosis (24 hour)	1	1	1	AT4G05590
GO:1901017	negative regulation of potassium ion transmembrane transporter activity	Pre-symbiosis (24 hour)	1	1	1	AT4G05590
GO:0008285	negative regulation of cell proliferation	Pre-symbiosis (24 hour)	1	1	1	AT5G62000
GO:0045786	negative regulation of cell cycle	Pre-symbiosis (24 hour)	1	1	6	AT1G02970,AT1G33240,AT2G32710,AT2G33560,AT3G48160,AT5G48820
GO:0010948	negative regulation of cell cycle process	Pre-symbiosis (24 hour)	1	1	1	AT1G33240
GO:1901988	negative regulation of cell cycle phase transition	Pre-symbiosis (24 hour)	1	1	1	AT2G33560
GO:1902100	negative regulation of metaphase/anaphase transition of cell cycle	Pre-symbiosis (24 hour)	1	1	1	AT2G33560
GO:1905819	negative regulation of chromosome separation	Pre-symbiosis (24 hour)	1	1	1	AT2G33560
GO:0033046	negative regulation of sister chromatid segregation	Pre-symbiosis (24 hour)	1	1	1	AT2G33560
GO:0000075	cell cycle checkpoint	Pre-symbiosis (24 hour)	1	1	2	AT1G02970,AT2G33560
GO:0031577	spindle checkpoint	Pre-symbiosis (24 hour)	1	1	1	AT2G33560
GO:0071173	spindle assembly checkpoint	Pre-symbiosis (24 hour)	1	1	1	AT2G33560
GO:0031570	DNA integrity checkpoint	Pre-symbiosis (24 hour)	1	1	1	AT1G02970
GO:0000076	DNA replication checkpoint	Pre-symbiosis (24 hour)	1	1	1	AT1G02970
GO:0007050	cell cycle arrest	Pre-symbiosis (24 hour)	1	1	1	AT1G02970
GO:0045930	negative regulation of mitotic cell cycle	Pre-symbiosis (24 hour)	1	1	1	AT2G33560
GO:1901991	negative regulation of mitotic cell cycle phase transition	Pre-symbiosis (24 hour)	1	1	1	AT2G33560
GO:0007093	mitotic cell cycle checkpoint	Pre-symbiosis (24 hour)	1	1	1	AT2G33560
GO:0045839	negative regulation of mitotic nuclear division	Pre-symbiosis (24 hour)	1	1	1	AT2G33560
GO:0033048	negative regulation of mitotic sister chromatid segregation	Pre-symbiosis (24 hour)	1	1	1	AT2G33560
GO:2000816	negative regulation of mitotic sister chromatid separation	Pre-symbiosis (24 hour)	1	1	1	AT2G33560
GO:0045841	negative regulation of mitotic metaphase/anaphase transition	Pre-symbiosis (24 hour)	1	1	1	AT2G33560
GO:0071174	mitotic spindle checkpoint	Pre-symbiosis (24 hour)	1	1	1	AT2G33560
GO:0007094	mitotic spindle assembly checkpoint	Pre-symbiosis (24 hour)	1	1	1	AT2G33560
GO:0048585	negative regulation of response to stimulus	Pre-symbiosis (24 hour)	1	1	2	AT3G07650,AT5G62570
GO:0002832	negative regulation of response to biotic stimulus	Pre-symbiosis (24 hour)	1	1	1	AT5G62570
GO:0032102	negative regulation of response to external stimulus	Pre-symbiosis (24 hour)	1	1	1	AT5G62570
GO:1901420	negative regulation of response to alcohol	Pre-symbiosis (24 hour)	1	1	3	AT2G33540,AT2G39550,AT3G51550
GO:1905958	negative regulation of cellular response to alcohol	Pre-symbiosis (24 hour)	1	1	3	AT2G33540,AT2G39550,AT3G51550
GO:0031348	negative regulation of defense response	Pre-symbiosis (24 hour)	1	1	1	AT5G62570
GO:1902289	negative regulation of defense response to oomycetes	Pre-symbiosis (24 hour)	1	1	1	AT3G59280
GO:1900425	negative regulation of defense response to bacterium	Pre-symbiosis (24 hour)	1	1	1	AT5G62570
GO:0050777	negative regulation of immune response	Pre-symbiosis (24 hour)	1	1	1	AT5G62570
GO:0045824	negative regulation of innate immune response	Pre-symbiosis (24 hour)	1	1	1	AT5G62570
GO:1902478	negative regulation of defense response to bacterium, incompatible interaction	Pre-symbiosis (24 hour)	1	1	1	AT5G62570
GO:0080148	negative regulation of response to water deprivation	Pre-symbiosis (24 hour)	1	1	1	AT5G14420
GO:0023057	negative regulation of signaling	Pre-symbiosis (24 hour)	1	1	3	AT2G33540,AT2G39550,AT3G51550
GO:0009968	negative regulation of signal transduction	Pre-symbiosis (24 hour)	1	1	3	AT2G33540,AT2G39550,AT3G51550
GO:0009788	negative regulation of abscisic acid-activated signaling pathway	Pre-symbiosis (24 hour)	1	1	3	AT2G33540,AT2G39550,AT3G51550
GO:0040008	regulation of growth	Pre-symbiosis (24 hour)	1	1	1	AT1G33240
GO:0045926	negative regulation of growth	Pre-symbiosis (24 hour)	1	1	1	AT1G33240
GO:0001558	regulation of cell growth	Pre-symbiosis (24 hour)	1	1	1	AT1G33240
GO:0030308	negative regulation of cell growth	Pre-symbiosis (24 hour)	1	1	1	AT1G33240
GO:0001560	regulation of cell growth by extracellular stimulus	Pre-symbiosis (24 hour)	1	1	1	AT5G58220
GO:0050793	regulation of developmental process	Pre-symbiosis (24 hour)	1	1	13	AT1G18750,AT1G33240,AT2G45660,AT3G07650,AT3G12380,AT3G18990,AT3G54610,AT4G04920,AT4G19040,AT4G22140,AT4G33200,AT5G24740,AT5G55630
GO:0022603	regulation of anatomical structure morphogenesis	Pre-symbiosis (24 hour)	1	1	2	AT1G18750,AT4G33200
GO:0022604	regulation of cell morphogenesis	Pre-symbiosis (24 hour)	1	1	5	AT1G18750,AT1G72710,AT2G31500,AT3G07160,AT4G33200
GO:0008360	regulation of cell shape	Pre-symbiosis (24 hour)	1	1	2	AT1G72710,AT4G33200
GO:0071963	establishment or maintenance of cell polarity regulating cell shape	Pre-symbiosis (24 hour)	1	1	1	AT4G33200
GO:2000769	regulation of establishment or maintenance of cell polarity regulating cell shape	Pre-symbiosis (24 hour)	1	1	1	AT4G33200
GO:0048832	specification of plant organ number	Pre-symbiosis (24 hour)	1	1	1	AT2G22370
GO:0051093	negative regulation of developmental process	Pre-symbiosis (24 hour)	1	1	3	AT3G07650,AT4G19040,AT4G22140
GO:0040034	regulation of development, heterochronic	Pre-symbiosis (24 hour)	1	1	1	AT2G22370
GO:0048509	regulation of meristem development	Pre-symbiosis (24 hour)	1	1	2	AT3G12380,AT5G24740
GO:0048506	regulation of timing of meristematic phase transition	Pre-symbiosis (24 hour)	1	1	1	AT2G22370
GO:0048510	regulation of timing of transition from vegetative to reproductive phase	Pre-symbiosis (24 hour)	1	1	1	AT2G22370
GO:0048638	regulation of developmental growth	Pre-symbiosis (24 hour)	1	1	3	AT1G18750,AT3G12380,AT5G24740
GO:0046620	regulation of organ growth	Pre-symbiosis (24 hour)	1	1	2	AT1G29420,AT1G29450
GO:0010075	regulation of meristem growth	Pre-symbiosis (24 hour)	1	1	2	AT3G12380,AT5G24740
GO:0051510	regulation of unidimensional cell growth	Pre-symbiosis (24 hour)	1	1	3	AT1G18750,AT2G31500,AT3G07160
GO:2000026	regulation of multicellular organismal development	Pre-symbiosis (24 hour)	1	1	11	AT1G33240,AT2G45660,AT3G07650,AT3G12380,AT3G18990,AT3G54610,AT4G04920,AT4G19040,AT4G22140,AT5G24740,AT5G55630
GO:0048580	regulation of post-embryonic development	Pre-symbiosis (24 hour)	1	1	8	AT1G33240,AT2G45660,AT3G07650,AT3G18990,AT3G54610,AT4G04920,AT4G22140,AT5G55630
GO:0048581	negative regulation of post-embryonic development	Pre-symbiosis (24 hour)	1	1	1	AT3G07650
GO:1900140	regulation of seedling development	Pre-symbiosis (24 hour)	1	1	3	AT2G42160,AT5G55630,AT5G66880
GO:0010029	regulation of seed germination	Pre-symbiosis (24 hour)	1	1	3	AT2G42160,AT5G55630,AT5G66880
GO:0010321	regulation of vegetative phase change	Pre-symbiosis (24 hour)	1	1	1	AT3G54610
GO:2000038	regulation of stomatal complex development	Pre-symbiosis (24 hour)	1	1	1	AT1G33240
GO:0048831	regulation of shoot system development	Pre-symbiosis (24 hour)	1	1	3	AT2G45660,AT3G18990,AT4G19040
GO:2000024	regulation of leaf development	Pre-symbiosis (24 hour)	1	1	3	AT4G19040,AT5G14930,AT5G62620
GO:1905622	negative regulation of leaf development	Pre-symbiosis (24 hour)	1	1	2	AT4G19040,AT5G62620
GO:1900055	regulation of leaf senescence	Pre-symbiosis (24 hour)	1	1	3	AT4G19040,AT5G14930,AT5G62620
GO:1900056	negative regulation of leaf senescence	Pre-symbiosis (24 hour)	1	1	2	AT4G19040,AT5G62620
GO:2000037	regulation of stomatal complex patterning	Pre-symbiosis (24 hour)	1	1	1	AT1G33240
GO:2000280	regulation of root development	Pre-symbiosis (24 hour)	1	1	2	AT3G12380,AT5G24740
GO:0010082	regulation of root meristem growth	Pre-symbiosis (24 hour)	1	1	2	AT3G12380,AT5G24740
GO:0045595	regulation of cell differentiation	Pre-symbiosis (24 hour)	1	1	3	AT1G18750,AT2G31500,AT3G07160
GO:0060284	regulation of cell development	Pre-symbiosis (24 hour)	1	1	3	AT1G18750,AT2G31500,AT3G07160
GO:0010769	regulation of cell morphogenesis involved in differentiation	Pre-symbiosis (24 hour)	1	1	3	AT1G18750,AT2G31500,AT3G07160
GO:1900908	regulation of olefin metabolic process	Pre-symbiosis (24 hour)	1	1	2	AT3G04070,AT3G20860
GO:0009889	regulation of biosynthetic process	Pre-symbiosis (24 hour)	1	1	42	AT1G05910,AT1G06920,AT1G13450,AT1G22770,AT1G33240,AT1G75540,AT2G27040,AT2G33540,AT2G45660,AT3G04070,AT3G07650,AT3G08550,AT3G16810,AT3G20770,AT3G24490,AT3G27100,AT3G47450,AT3G54610,AT3G57670,AT4G03560,AT4G04920,AT4G17880,AT4G22140,AT4G23980,AT4G26640,AT4G26840,AT4G29100,AT4G31270,AT4G35580,AT4G36990,AT5G09460,AT5G20730,AT5G27030,AT5G28040,AT5G40330,AT5G53180,AT5G54680,AT5G56960,AT5G58003,AT5G61760…
GO:1900911	regulation of olefin biosynthetic process	Pre-symbiosis (24 hour)	1	1	2	AT3G04070,AT3G20860
GO:0043455	regulation of secondary metabolic process	Pre-symbiosis (24 hour)	1	1	1	AT1G68320
GO:0060255	regulation of macromolecule metabolic process	Pre-symbiosis (24 hour)	1	1	38	AT1G08370,AT1G13450,AT1G14790,AT1G33240,AT1G47710,AT1G47720,AT1G75540,AT2G22090,AT2G23380,AT2G32710,AT2G41370,AT2G45660,AT3G07650,AT3G08550,AT3G13300,AT3G16810,AT3G20770,AT3G24490,AT3G27100,AT3G47450,AT3G54610,AT3G57670,AT3G63340,AT4G04920,AT4G17880,AT4G22140,AT4G23980,AT4G26840,AT4G31270,AT4G36990,AT5G09460,AT5G27030,AT5G28040,AT5G40330,AT5G53180,AT5G54680,AT5G58003,AT5G61760
GO:0071514	genetic imprinting	Pre-symbiosis (24 hour)	1	1	3	AT2G23380,AT3G20740,AT5G04560
GO:0010556	regulation of macromolecule biosynthetic process	Pre-symbiosis (24 hour)	1	1	27	AT1G13450,AT1G33240,AT1G75540,AT2G45660,AT3G07650,AT3G08550,AT3G16810,AT3G20770,AT3G24490,AT3G27100,AT3G54610,AT3G57670,AT4G04920,AT4G17880,AT4G22140,AT4G23980,AT4G26840,AT4G31270,AT4G36990,AT5G09460,AT5G27030,AT5G28040,AT5G40330,AT5G53180,AT5G54680,AT5G58003,AT5G61760
GO:0010468	regulation of gene expression	Pre-symbiosis (24 hour)	1	1	32	AT1G08370,AT1G13450,AT1G14790,AT1G33240,AT1G75540,AT2G22090,AT2G23380,AT2G45660,AT3G07650,AT3G13300,AT3G16810,AT3G20770,AT3G24490,AT3G27100,AT3G54610,AT3G57670,AT3G63340,AT4G04920,AT4G17880,AT4G22140,AT4G23980,AT4G26840,AT4G31270,AT4G36990,AT5G09460,AT5G27030,AT5G28040,AT5G40330,AT5G53180,AT5G54680,AT5G58003,AT5G61760
GO:0040029	regulation of gene expression, epigenetic	Pre-symbiosis (24 hour)	1	1	13	AT1G05910,AT1G09700,AT1G14790,AT2G23380,AT2G27040,AT2G39740,AT3G20740,AT3G49250,AT4G22140,AT4G31270,AT5G04290,AT5G04560,AT5G09860
GO:0006349	regulation of gene expression by genetic imprinting	Pre-symbiosis (24 hour)	1	1	3	AT2G23380,AT3G20740,AT5G04560
GO:0010608	posttranscriptional regulation of gene expression	Pre-symbiosis (24 hour)	1	1	11	AT1G09700,AT1G14790,AT2G22090,AT2G27040,AT2G39740,AT3G12680,AT3G16810,AT5G04290,AT5G09860,AT5G53180,ATCG00380
GO:0032922	circadian regulation of gene expression	Pre-symbiosis (24 hour)	1	1	1	AT4G04920
GO:0009894	regulation of catabolic process	Pre-symbiosis (24 hour)	1	1	3	AT1G32340,AT2G22090,AT3G14250
GO:0031323	regulation of cellular metabolic process	Pre-symbiosis (24 hour)	1	1	54	AT1G05910,AT1G06920,AT1G13450,AT1G22770,AT1G32340,AT1G33240,AT1G47710,AT1G47720,AT1G67080,AT1G69040,AT1G75500,AT1G75540,AT2G17520,AT2G22090,AT2G27040,AT2G32710,AT2G33540,AT2G45660,AT3G04070,AT3G07650,AT3G08550,AT3G16810,AT3G20770,AT3G24490,AT3G27100,AT3G47450,AT3G54610,AT3G57670,AT4G03560,AT4G04020,AT4G04920,AT4G17880,AT4G22140,AT4G23980,AT4G26640,AT4G26840,AT4G29100,AT4G31270,AT4G35580,AT4G36990…
GO:0043467	regulation of generation of precursor metabolites and energy	Pre-symbiosis (24 hour)	1	1	1	AT4G04020
GO:0010565	regulation of cellular ketone metabolic process	Pre-symbiosis (24 hour)	1	1	8	AT1G68320,AT1G69040,AT1G75500,AT3G04070,AT3G20860,AT3G47450,AT4G03560,AT4G13040
GO:0010337	regulation of salicylic acid metabolic process	Pre-symbiosis (24 hour)	1	1	1	AT4G13040
GO:0051174	regulation of phosphorus metabolic process	Pre-symbiosis (24 hour)	1	1	4	AT2G17520,AT2G32710,AT3G47450,AT5G48820
GO:0019220	regulation of phosphate metabolic process	Pre-symbiosis (24 hour)	1	1	4	AT2G17520,AT2G32710,AT3G47450,AT5G48820
GO:0042325	regulation of phosphorylation	Pre-symbiosis (24 hour)	1	1	3	AT2G17520,AT2G32710,AT5G48820
GO:0043549	regulation of kinase activity	Pre-symbiosis (24 hour)	1	1	3	AT2G17520,AT2G32710,AT5G48820
GO:0031326	regulation of cellular biosynthetic process	Pre-symbiosis (24 hour)	1	1	42	AT1G05910,AT1G06920,AT1G13450,AT1G22770,AT1G33240,AT1G75540,AT2G27040,AT2G33540,AT2G45660,AT3G04070,AT3G07650,AT3G08550,AT3G16810,AT3G20770,AT3G24490,AT3G27100,AT3G47450,AT3G54610,AT3G57670,AT4G03560,AT4G04920,AT4G17880,AT4G22140,AT4G23980,AT4G26640,AT4G26840,AT4G29100,AT4G31270,AT4G35580,AT4G36990,AT5G09460,AT5G20730,AT5G27030,AT5G28040,AT5G40330,AT5G53180,AT5G54680,AT5G56960,AT5G58003,AT5G61760…
GO:2000112	regulation of cellular macromolecule biosynthetic process	Pre-symbiosis (24 hour)	1	1	39	AT1G05910,AT1G06920,AT1G13450,AT1G22770,AT1G33240,AT1G75540,AT2G27040,AT2G33540,AT2G45660,AT3G07650,AT3G08550,AT3G16810,AT3G20770,AT3G24490,AT3G27100,AT3G54610,AT3G57670,AT4G04920,AT4G17880,AT4G22140,AT4G23980,AT4G26640,AT4G26840,AT4G29100,AT4G31270,AT4G35580,AT4G36990,AT5G09460,AT5G20730,AT5G27030,AT5G28040,AT5G40330,AT5G53180,AT5G54680,AT5G56960,AT5G58003,AT5G61760,AT5G62940,AT5G63320
GO:0031329	regulation of cellular catabolic process	Pre-symbiosis (24 hour)	1	1	3	AT1G32340,AT2G22090,AT3G14250
GO:2000377	regulation of reactive oxygen species metabolic process	Pre-symbiosis (24 hour)	1	1	3	AT1G67080,AT3G59280,AT5G10530
GO:0010310	regulation of hydrogen peroxide metabolic process	Pre-symbiosis (24 hour)	1	1	1	AT5G10530
GO:0090322	regulation of superoxide metabolic process	Pre-symbiosis (24 hour)	1	1	1	AT1G67080
GO:0032928	regulation of superoxide anion generation	Pre-symbiosis (24 hour)	1	1	1	AT1G67080
GO:0042762	regulation of sulfur metabolic process	Pre-symbiosis (24 hour)	1	1	1	AT3G04070
GO:0010109	regulation of photosynthesis	Pre-symbiosis (24 hour)	1	1	1	AT4G04020
GO:0042548	regulation of photosynthesis, light reaction	Pre-symbiosis (24 hour)	1	1	1	AT4G04020
GO:0010629	negative regulation of gene expression	Pre-symbiosis (24 hour)	1	1	24	AT1G05910,AT1G06920,AT1G08370,AT1G09700,AT1G14790,AT1G33240,AT1G50410,AT2G22090,AT2G22370,AT2G27040,AT2G30470,AT2G39740,AT3G07750,AT3G13300,AT3G49250,AT4G22140,AT4G31270,AT4G35580,AT4G36990,AT5G04290,AT5G14620,AT5G21160,AT5G58130,AT5G63320
GO:0016458	gene silencing	Pre-symbiosis (24 hour)	1	1	12	AT1G05910,AT1G09700,AT1G14790,AT1G50410,AT2G27040,AT2G39740,AT3G49250,AT4G22140,AT4G31270,AT5G04290,AT5G14620,AT5G58130
GO:0098795	mRNA cleavage involved in gene silencing	Pre-symbiosis (24 hour)	1	1	1	AT1G09700
GO:0031047	gene silencing by RNA	Pre-symbiosis (24 hour)	1	1	7	AT1G09700,AT1G14790,AT1G50410,AT2G27040,AT2G39740,AT3G49250,AT5G04290
[truncated: 4,362 more rows]
